# Supplementary material for: Functional characterization of all CDKN2A missense variants and comparison to in silico models of pathogenicity
Source: eLife. 2025 Apr 16;13:RP95347. doi: 10.7554/eLife.95347 (PMC12002794; doi:10.7554/eLife.95347)
Supplement: Figure 1—figure supplement 1—source data 1. [file elife-95347-fig1-figsupp1-data1.xlsx]

## Sheet: Figure1-figure supplement 1A
Variant	Replicate	Replicate	Replicate	Average	Ratio	S.D
Empty vector	12.6	12.5	13.2	12.7667	1	0.0296549
Codon optimized	3.9	4..2	2.9	3.4	0.266319	0.055387
L32L	4.6	4.9	4.9	4.8	0.375979	0.013567
G101G	4.4	4.4	3.2	4	0.313316	0.0542679
V126V	4.1	4.2	4.9	4.4	0.344648	0.0341428
L32P	11	9.52	12.3	10.94	0.856919	0.108953
G101W	12.5	8.6	10.1	10.4	0.814621	0.154091
V126D	12.8	11.8	11.3	11.9667	0.937337	0.0598247
