# Supplementary material for: Functional characterization of all CDKN2A missense variants and comparison to in silico models of pathogenicity
Source: eLife. 2025 Apr 16;13:RP95347. doi: 10.7554/eLife.95347 (PMC12002794; doi:10.7554/eLife.95347)
Supplement: Figure 1—figure supplement 1—source data 2. [file elife-95347-fig1-figsupp1-data2.xlsx]

## Sheet: Figure 1- figure supplement 1B
	Day 9	Confluent
Barcode 1	4.51781	4.35407
Barcode 2	5.58165	5.68904
Barcode 3	4.73219	5.00329
Barcode 4	6.20377	6.16893
Barcode 5	4.65158	4.7788
Barcode 6	5.38619	5.46669
Barcode 7	4.3897	4.77924
Barcode 8	4.88016	4.96098
Barcode 9	5.22257	5.25954
Barcode 10	4.84438	4.5472
Barcode 11	6.10093	6.23486
Barcode 12	6.5243	6.56917
Barcode 13	4.40692	4.44354
Barcode 14	6.30799	5.98864
Barcode 15	5.99176	6.08761
Barcode 16	3.67709	3.60088
Barcode 17	1.25955	1.06535
Barcode 18	6.11252	6.13112
Barcode 19	6.42147	6.15228
Barcode 20	2.78748	2.71876
