# Supplementary material for: Functional characterization of all CDKN2A missense variants and comparison to in silico models of pathogenicity
Source: eLife. 2025 Apr 16;13:RP95347. doi: 10.7554/eLife.95347 (PMC12002794; doi:10.7554/eLife.95347)
Supplement: Figure 1—source data 1. [file elife-95347-fig1-data1.xlsx]

## Sheet: Figure 1
Figure 1A				Figure 1B
	Day 9	Confluent			Day 9	Confluent
p.V126R	6.56567	23.1568		p.R144P	2.86624	2.81116
p.V126W	5.67376	17.5265		p.R144R	4.27651	4.66723
p.V126K	5.3827	13.3155		p.R144G	4.26976	4.51441
p.V126Y	4.98097	13.0066		p.R144K	3.60327	3.54181
p.V126D	3.76747	8.98074		p.R144I	4.05629	4.09417
p.V126H	4.87169	5.45941		p.R144H	4.20842	4.20878
p.V126Q	5.83785	2.5181		p.R144E	5.0939	5.31192
p.V126V	3.70468	1.32153		p.R144D	4.244	4.14511
p.V126N	4.71524	1.64572		p.R144Q	5.17027	5.36604
p.V126F	4.76242	1.6469		p.R144S	4.15873	4.00185
p.V126G	4.624	1.57853		p.R144A	5.36412	5.55706
p.V126M	6.78631	1.55259		p.R144M	4.54304	4.4189
p.V126E	5.37541	1.47832		p.R144T	4.61389	4.50486
p.V126A	4.82555	1.24726		p.R144Y	4.99667	4.9649
p.V126S	4.76138	1.08222		p.R144W	5.28652	5.27849
p.V126I	5.60819	1.32153		p.R144L	7.12557	7.48476
p.V126P	5.19294	1.04331		p.R144V	6.04257	5.99163
p.V126L	4.26252	0.84526		p.R144N	6.06036	5.82767
p.V126C	3.67623	0.592979		p.R144F	6.60078	6.51215
p.V126T	4.62504	0.680216		p.R144C	7.4191	6.79709
