# Supplementary material for: Functional characterization of all CDKN2A missense variants and comparison to in silico models of pathogenicity
Source: eLife. 2025 Apr 16;13:RP95347. doi: 10.7554/eLife.95347 (PMC12002794; doi:10.7554/eLife.95347)
Supplement: Figure 2—figure supplement 1—source data 1. [file elife-95347-fig2-figsupp1-data1.xlsx]

## Sheet: Figure 2-figure supplement 1
Figure 2-figure supplement 1A			Figure 2-figure supplement 1B
Log P value	Number of variant			Number of varaiant
Less than -50	525		Log P value	Pathogenic	Benign	Functionally deleterious VUS	Functionally neutral VUS
From -35 to-30	98		Less than -50	27		28
From -30 to-20	109		From -35 to-30	2		2
From -20 to-10	228		From -30 to-20	2		1
From -10 to-5	279		From -20 to-10	1			2
From -5 to-2	420		From -10 to-5				1
From -2 to-1	444		From -5 to-2		1		3
From -1 to-0	1017		From -2 to-1		2		5
			From -1 to-0		3		7
