# Supplementary material for: Functional characterization of all CDKN2A missense variants and comparison to in silico models of pathogenicity
Source: eLife. 2025 Apr 16;13:RP95347. doi: 10.7554/eLife.95347 (PMC12002794; doi:10.7554/eLife.95347)
Supplement: Figure 2—figure supplement 2—source data 1. [file elife-95347-fig2-figsupp2-data1.xlsx]

## Sheet: Figure 2-figure supplement 2D
		Log2 P value
		Deleterious	Indeterminate	Neutral
Log2 normalized fold change	Deleterious	517	115	0
	Indeterminate	8	468	198
	Neutral	0	72	1742
