# Supplementary material for: Functional characterization of all CDKN2A missense variants and comparison to in silico models of pathogenicity
Source: eLife. 2025 Apr 16;13:RP95347. doi: 10.7554/eLife.95347 (PMC12002794; doi:10.7554/eLife.95347)
Supplement: Figure 2—figure supplement 3—source data 1. [file elife-95347-fig2-figsupp3-data1.xlsx]

## Sheet: Figure 2-figure supplement 3A
Residues	Variant	Log2 P value_1	Log2 P value_2
15	p.Trp15Asn	-7.5941	-0.021428
15	p.Trp15Lys	-4.65698	-0.0067839
15	p.Trp15Thr	-13.5314	-1.28935
15	p.Trp15Arg	-3.39334	-0.00863529
15	p.Trp15Ser	-4.03689	-0.00336033
15	p.Trp15Ile	-1.4705	-1.10883
15	p.Trp15Met	-2.95043	-0.746984
15	p.Trp15His	-12.9967	-15.3136
15	p.Trp15Gln	-5.90915	-1.28767
15	p.Trp15Pro	-23.2627	-9.0474
15	p.Trp15Leu	-1.28267	-0.316046
15	p.Trp15Asp	-1.21733	-0.280686
15	p.Trp15Glu	-0.520197	-0.595663
15	p.Trp15Ala	-3.19962	-0.0132495
15	p.Trp15Gly	-3.80165	-8.45789
15	p.Trp15Val	-2.66885	-0.0134518
15	p.Trp15Tyr	-8.61129	-0.151468
15	p.Trp15Cys	-8.48005	-0.0778029
15	p.Trp15Trp	-1.06151	-1.06151
15	p.Trp15Phe	-1.75608	-0.00409704
20	p.Ala20Asn	-53.1508	-53.1508
20	p.Ala20Lys	-53.1508	-53.1508
20	p.Ala20Thr	-16.0617	-10.1116
20	p.Ala20Arg	-53.1508	-53.1508
20	p.Ala20Ser	-2.25068	-27.073
20	p.Ala20Ile	-53.1508	-53.1508
20	p.Ala20Met	-53.1508	-53.1508
20	p.Ala20His	-53.1508	-53.1508
20	p.Ala20Gln	-53.1508	-53.1508
20	p.Ala20Pro	-53.1508	-53.1508
20	p.Ala20Leu	-53.1508	-53.1508
20	p.Ala20Asp	-53.1508	-53.1508
20	p.Ala20Glu	-53.1508	-53.1508
20	p.Ala20Ala	-1.06151	-1.06151
20	p.Ala20Gly	-53.1508	-20.6403
20	p.Ala20Val	-2.7404	-10.0948
20	p.Ala20Tyr	-53.1508	-53.1508
20	p.Ala20Cys	-2.84348	-5.42584
20	p.Ala20Trp	-53.1508	-53.1508
20	p.Ala20Phe	-53.1508	-53.1508
24	p.Arg24Asn	-0.0913844	-1.69635
24	p.Arg24Lys	-0.00160448	-3.49252
24	p.Arg24Thr	-0.0496617	-6.38243
24	p.Arg24Arg	-1.06151	-1.06151
24	p.Arg24Ser	-0.00073987	-0.924046
24	p.Arg24Ile	-0.190961	-1.04137
24	p.Arg24Met	-0.339824	-1.40258
24	p.Arg24His	-0.000129065	-0.172428
24	p.Arg24Gln	-8.69308	-11.4186
24	p.Arg24Pro	-53.1508	-53.1508
24	p.Arg24Leu	-0.297637	-2.22666
24	p.Arg24Asp	-0.0117507	-0.0731673
24	p.Arg24Glu	-0.00827805	-2.43455
24	p.Arg24Ala	-0.000361868	-0.336452
24	p.Arg24Gly	-0.0457837	-5.10217
24	p.Arg24Val	-0.00226162	-0.659538
24	p.Arg24Tyr	-0.0104674	-2.59895
24	p.Arg24Cys	-0.409226	-0.160832
24	p.Arg24Trp	-0.234421	-1.18711
24	p.Arg24Phe	-0.109778	-0.444885
27	p.Glu27Asn	-0.011523	-19.1496
27	p.Glu27Lys	-0.384966	-0.678919
27	p.Glu27Thr	-25.4476	-6.91766
27	p.Glu27Arg	-3.02968	-5.8977
27	p.Glu27Ser	-1.34333	-5.15421
27	p.Glu27Ile	-0.0834036	-4.97341
27	p.Glu27Met	-1.373	-2.89638
27	p.Glu27His	-1.39105	-5.27201
27	p.Glu27Gln	-1.43717	-3.97704
27	p.Glu27Pro	-4.39592	-6.0995
27	p.Glu27Leu	-0.0143142	-4.05646
27	p.Glu27Asp	-4.295	-25.7488
27	p.Glu27Glu	-1.06151	-1.06151
27	p.Glu27Ala	-1.07825	-4.2447
27	p.Glu27Gly	-10.7457	-11.0763
27	p.Glu27Val	-0.183521	-1.75614
27	p.Glu27Tyr	-53.1508	-8.60361
27	p.Glu27Cys	-6.9433	-15.6194
27	p.Glu27Trp	-0.121661	-1.03368
27	p.Glu27Phe	-0.0126393	-0.882549
32	p.Leu32Asn	-24.9218	-29.7941
32	p.Leu32Lys	-29.0409	-27.2643
32	p.Leu32Thr	-19.793	-0.0376488
32	p.Leu32Arg	-41.6585	-51.415
32	p.Leu32Ser	-35.0786	-4.41231
32	p.Leu32Ile	-0.447292	-0.000101371
32	p.Leu32Met	-0.6293	-1.10871e-05
32	p.Leu32His	-52	-40.1553
32	p.Leu32Gln	-9.0475	-5.04547
32	p.Leu32Pro	-28.9444	-43.5571
32	p.Leu32Leu	-1.06151	-1.06151
32	p.Leu32Asp	-41.3022	-53.1508
32	p.Leu32Glu	-45.2384	-40.7604
32	p.Leu32Ala	-8.43099	-14.242
32	p.Leu32Gly	-53.1508	-36.8285
32	p.Leu32Val	-0.39565	-1.55661e-05
32	p.Leu32Tyr	-30.2303	-31.4324
32	p.Leu32Cys	-5.42882	-0.000152917
32	p.Leu32Trp	-32.2035	-29.6051
32	p.Leu32Phe	-7.75703	-0.00735581
34	p.Ala34Asn	-5.06094	-9.96399
34	p.Ala34Lys	-1.62642	-0.922047
34	p.Ala34Thr	-1.33596	-7.07015
34	p.Ala34Arg	-0.0688738	-0.0702894
34	p.Ala34Ser	-0.470278	-4.43903
34	p.Ala34Ile	-1.50494	-0.861088
34	p.Ala34Met	-1.25276	-0.132075
34	p.Ala34His	-0.0695609	-0.580108
34	p.Ala34Gln	-1.55869	-1.97798
34	p.Ala34Pro	-11.0809	-4.35683
34	p.Ala34Leu	-0.670119	-0.681247
34	p.Ala34Asp	-2.80831	-0.433238
34	p.Ala34Glu	-3.24604	-0.897762
34	p.Ala34Ala	-1.06151	-1.06151
34	p.Ala34Gly	-4.55949	-0.283938
34	p.Ala34Val	-13.9947	-1.86515
34	p.Ala34Tyr	-0.0313512	-0.951337
34	p.Ala34Cys	-1.01084	-0.088865
34	p.Ala34Trp	-2.44936	-0.682556
34	p.Ala34Phe	-0.589711	-0.0489906
35	p.Gly35Asn	-8.72779	-1.64943
35	p.Gly35Lys	-12.3113	-4.60366
35	p.Gly35Thr	-25.9747	-15.4452
35	p.Gly35Arg	-2.05972	-2.38988
35	p.Gly35Ser	-12.4838	-5.14277
35	p.Gly35Ile	-53.1508	-53.1508
35	p.Gly35Met	-15.1471	-10.3911
35	p.Gly35His	-2.1364	-2.69115
35	p.Gly35Gln	-5.27711	-7.21175
35	p.Gly35Pro	-53.1508	-53.1508
35	p.Gly35Leu	-53.1508	-22.2598
35	p.Gly35Asp	-17.4911	-3.68981
35	p.Gly35Glu	-6.09192	-7.71979
35	p.Gly35Ala	-6.09646	-4.51608
35	p.Gly35Gly	-1.06151	-1.06151
35	p.Gly35Val	-53.1508	-37.261
35	p.Gly35Tyr	-26.3035	-4.46506
35	p.Gly35Cys	-11.5099	-4.72531
35	p.Gly35Trp	-40.9625	-14.6008
35	p.Gly35Phe	-8.60383	-3.56658
45	p.Gly45Asn	-0.0361987	-3.50506
45	p.Gly45Lys	-4.19299	-2.19793
45	p.Gly45Thr	-0.0112261	-3.59152
45	p.Gly45Arg	-0.282298	-1.27351
45	p.Gly45Ser	-13.1022	-0.849021
45	p.Gly45Ile	-15.3758	-2.00042
45	p.Gly45Met	-2.82373	-1.80666
45	p.Gly45His	-1.72188	-2.17227
45	p.Gly45Gln	-0.0179677	-1.07273
45	p.Gly45Pro	-53.1508	-53.1508
45	p.Gly45Leu	-1.04208	-1.0862
45	p.Gly45Asp	-0.0132099	-1.02812
45	p.Gly45Glu	-1.2643	-1.39048
45	p.Gly45Ala	-0.0106266	-4.12761
45	p.Gly45Gly	-1.06151	-1.06151
45	p.Gly45Val	-20.691	-5.32745
45	p.Gly45Tyr	-0.054191	-5.62149
45	p.Gly45Cys	-0.110613	-1.48259
45	p.Gly45Trp	-1.42284	-5.01373
45	p.Gly45Phe	-0.0940979	-0.479342
57	p.Ala57Asn	-8.42416e-07	-1.686
57	p.Ala57Lys	-2.62951e-07	-4.12973
57	p.Ala57Thr	-0.00064173	-5.777
57	p.Ala57Arg	-1.56794e-05	-1.00517
57	p.Ala57Ser	-3.19857e-05	-6.569
57	p.Ala57Ile	-0.10991	-2.51386
57	p.Ala57Met	-1.92311e-06	-5.54136
57	p.Ala57His	-1.45078e-05	-0.162258
57	p.Ala57Gln	-7.20585e-06	-3.41908
57	p.Ala57Pro	-0.000347228	-7.51248
57	p.Ala57Leu	-3.44559e-07	-12.5846
57	p.Ala57Asp	-0.0101441	-0.669057
57	p.Ala57Glu	-6.85657e-05	-12.9976
57	p.Ala57Ala	-1.06151	-1.06151
57	p.Ala57Gly	-2.63028e-07	-2.63932
57	p.Ala57Val	-1.29445e-05	-0.79419
57	p.Ala57Tyr	-7.92584e-05	-19.8533
57	p.Ala57Cys	-5.41776e-10	-7.62288
57	p.Ala57Trp	-3.20654e-06	-11.5897
57	p.Ala57Phe	-2.374e-09	-18.964
62	p.Leu62Asn	-0.00291626	-0.0204731
62	p.Leu62Lys	-2.77912	-0.0110428
62	p.Leu62Thr	-0.856867	-0.00331741
62	p.Leu62Arg	-37.9211	-0.000235667
62	p.Leu62Ser	-0.371446	-0.034036
62	p.Leu62Ile	-10.5807	-0.00155335
62	p.Leu62Met	-0.0127549	-1.56862e-07
62	p.Leu62His	-1.03475e-05	-0.000198045
62	p.Leu62Gln	-49.0931	-0.847768
62	p.Leu62Pro	-15.757	-1.19251
62	p.Leu62Leu	-1.06151	-1.06151
62	p.Leu62Asp	-0.192122	-0.195344
62	p.Leu62Glu	-0.521399	-1.97572e-09
62	p.Leu62Ala	-0.196026	-4.26045e-07
62	p.Leu62Gly	-5.16811	-1.38986
62	p.Leu62Val	-0.844666	-1.73409e-05
62	p.Leu62Tyr	-11.3947	-0.171088
62	p.Leu62Cys	-5.30702	-2.52566
62	p.Leu62Trp	-0.0153944	-0.0175484
62	p.Leu62Phe	-0.00131443	-0.00283918
72	p.Cys72Asn	-7.97599	-0.388308
72	p.Cys72Lys	-8.3433	-1.30978
72	p.Cys72Thr	-5.62932	-0.0758341
72	p.Cys72Arg	-1.75251	-0.00963268
72	p.Cys72Ser	-6.3051	-5.20184
72	p.Cys72Ile	-8.61206	-1.65263
72	p.Cys72Met	-2.7382	-2.76973
72	p.Cys72His	-7.22805	-6.27246
72	p.Cys72Gln	-15.9427	-0.246286
72	p.Cys72Pro	-10.7855	-0.00741578
72	p.Cys72Leu	-17.6381	-6.47967
72	p.Cys72Asp	-1.25621	-2.50077
72	p.Cys72Glu	-2.85905	-2.44338
72	p.Cys72Ala	-2.61202	-4.81488
72	p.Cys72Gly	-5.16316	-0.00142154
72	p.Cys72Val	-5.58023	-2.34624
72	p.Cys72Tyr	-1.70091	-0.188211
72	p.Cys72Cys	-1.06151	-1.06151
72	p.Cys72Trp	-13.8151	-0.671682
72	p.Cys72Phe	-1.57642	-10.1233
73	p.Ala73Asn	-7.09843	-3.83301
73	p.Ala73Lys	-0.666467	-4.4127
73	p.Ala73Thr	-1.26204	-0.41015
73	p.Ala73Arg	-5.14532	-1.34999
73	p.Ala73Ser	-3.6729	-2.13383
73	p.Ala73Ile	-0.52291	-2.48555
73	p.Ala73Met	-1.29384	-3.85563
73	p.Ala73His	-0.230898	-0.659782
73	p.Ala73Gln	-4.809	-3.5224
73	p.Ala73Pro	-1.49086	-3.02751
73	p.Ala73Leu	-0.807131	-2.43737
73	p.Ala73Asp	-4.57327	-3.54105
73	p.Ala73Glu	-1.23436	-2.58176
73	p.Ala73Ala	-1.06151	-1.06151
73	p.Ala73Gly	-3.40778	-1.78172
73	p.Ala73Val	-3.56986	-0.600435
73	p.Ala73Tyr	-2.25062	-4.27251
73	p.Ala73Cys	-3.4048	-1.78969
73	p.Ala73Trp	-7.71682	-2.37236
73	p.Ala73Phe	-1.5083	-3.70091
74	p.Asp74Asn	-16.1224	-26.3027
74	p.Asp74Lys	-53.1508	-53.1508
74	p.Asp74Thr	-53.1508	-53.1508
74	p.Asp74Arg	-53.1508	-53.1508
74	p.Asp74Ser	-3.49696	-12.6074
74	p.Asp74Ile	-53.1508	-53.1508
74	p.Asp74Met	-53.1508	-53.1508
74	p.Asp74His	-5.37911	-2.83531
74	p.Asp74Gln	-53.1508	-53.1508
74	p.Asp74Pro	-53.1508	-53.1508
74	p.Asp74Leu	-53.1508	-53.1508
74	p.Asp74Asp	-1.06151	-1.06151
74	p.Asp74Glu	-0.000234829	-4.71539e-06
74	p.Asp74Ala	-53.1508	-53.1508
74	p.Asp74Gly	-39.8218	-27.2214
74	p.Asp74Val	-53.1508	-53.1508
74	p.Asp74Tyr	-53.1508	-53.1508
74	p.Asp74Cys	-0.0363112	-0.108201
74	p.Asp74Trp	-53.1508	-53.1508
74	p.Asp74Phe	-53.1508	-53.1508
75	p.Pro75Asn	-1.8368	-2.33288
75	p.Pro75Lys	-5.17881	-2.16126
75	p.Pro75Thr	-2.80916	-0.798176
75	p.Pro75Arg	-0.574968	-1.39161
75	p.Pro75Ser	-3.05586	-0.365618
75	p.Pro75Ile	-0.952449	-3.23422
75	p.Pro75Met	-5.42553	-1.61351
75	p.Pro75His	-1.0416	-0.123266
75	p.Pro75Gln	-4.97665	-1.11141
75	p.Pro75Pro	-1.06151	-1.06151
75	p.Pro75Leu	-2.45987	-1.13795
75	p.Pro75Asp	-2.65915	-1.12671
75	p.Pro75Glu	-2.12144	-0.352009
75	p.Pro75Ala	-1.83431	-0.589013
75	p.Pro75Gly	-2.17172	-0.757186
75	p.Pro75Val	-1.5986	-1.30083
75	p.Pro75Tyr	-1.50421	-1.35639
75	p.Pro75Cys	-2.65926	-0.630686
75	p.Pro75Trp	-3.29392	-1.84528
75	p.Pro75Phe	-1.72917	-1.51462
96	p.Val96Asn	-0.25991	-7.47422
96	p.Val96Lys	-0.4196	-1.02601
96	p.Val96Thr	-0.0573621	-1.48078
96	p.Val96Arg	-0.249487	-1.18653
96	p.Val96Ser	-0.151978	-0.251846
96	p.Val96Ile	-2.20613	-6.40278
96	p.Val96Met	-0.451619	-1.4633
96	p.Val96His	-4.0254	-3.31013
96	p.Val96Gln	-0.925814	-4.04154
96	p.Val96Pro	-1.9372	-0.837792
96	p.Val96Leu	-3.19128	-13.2693
96	p.Val96Asp	-0.733578	-13.4207
96	p.Val96Glu	-0.0128642	-2.40873
96	p.Val96Ala	-15.6519	-42.5395
96	p.Val96Gly	-6.46164	-1.61193
96	p.Val96Val	-1.06151	-1.06151
96	p.Val96Tyr	-2.40513	-8.07472
96	p.Val96Cys	-0.415578	-11.2503
96	p.Val96Trp	-0.360829	-21.6439
96	p.Val96Phe	-0.285414	-5.304
106	p.Val106Asn	-7.07103	-4.24527
106	p.Val106Lys	-18.9788	-1.65944
106	p.Val106Thr	-1.6643	-1.77051
106	p.Val106Arg	-26.7118	-1.82076
106	p.Val106Ser	-1.38674	-0.578066
106	p.Val106Ile	-0.0205132	-2.53625
106	p.Val106Met	-1.02586	-1.07651
106	p.Val106His	-0.683335	-1.26339
106	p.Val106Gln	-0.0164211	-3.40934
106	p.Val106Pro	-21.8423	-4.23804
106	p.Val106Leu	-9.78043	-3.33312
106	p.Val106Asp	-0.502554	-2.36184
106	p.Val106Glu	-27.4223	-6.66645
106	p.Val106Ala	-6.62061	-1.76608
106	p.Val106Gly	-12.4023	-0.501276
106	p.Val106Val	-1.06151	-1.06151
106	p.Val106Tyr	-0.388061	-2.87829
106	p.Val106Cys	-2.95673	-0.430916
106	p.Val106Trp	-13.1546	-3.91243
106	p.Val106Phe	-0.601136	-2.05991
107	p.Arg107Asn	-1.5042	-3.31784
107	p.Arg107Lys	-1.22835	-1.00221
107	p.Arg107Thr	-0.416497	-0.0389985
107	p.Arg107Arg	-1.06151	-1.06151
107	p.Arg107Ser	-3.58975	-2.26043
107	p.Arg107Ile	-2.26397	-0.35292
107	p.Arg107Met	-0.327588	-0.220007
107	p.Arg107His	-1.34205	-2.07205
107	p.Arg107Gln	-0.087113	-0.00653203
107	p.Arg107Pro	-0.436045	-0.097331
107	p.Arg107Leu	-0.846407	-3.14147
107	p.Arg107Asp	-2.06823	-1.29024
107	p.Arg107Glu	-3.47883	-4.9655
107	p.Arg107Ala	-0.160645	-0.0542868
107	p.Arg107Gly	-1.16033	-2.15739
107	p.Arg107Val	-0.1635	-0.443639
107	p.Arg107Tyr	-1.81586	-0.696751
107	p.Arg107Cys	-1.57888	-10.1228
107	p.Arg107Trp	-0.434062	-0.10801
107	p.Arg107Phe	-1.34505	-1.37816
109	p.Ala109Asn	-0.0543061	-6.54744e-05
109	p.Ala109Lys	-1.14908	-1.01393
109	p.Ala109Thr	-0.787012	-0.00019822
109	p.Ala109Arg	-0.0789713	-1.35892
109	p.Ala109Ser	-0.00686489	-0.0272501
109	p.Ala109Ile	-0.0108239	-7.81171e-06
109	p.Ala109Met	-0.0024777	-0.00123512
109	p.Ala109His	-0.00819731	-0.00380544
109	p.Ala109Gln	-0.325722	-0.0188539
109	p.Ala109Pro	-53.1508	-53.1508
109	p.Ala109Leu	-1.26414e-05	-2.14519
109	p.Ala109Asp	-0.104274	-0.0652718
109	p.Ala109Glu	-2.5754	-0.137914
109	p.Ala109Ala	-1.06151	-1.06151
109	p.Ala109Gly	-0.0528803	-0.0259984
109	p.Ala109Val	-0.133866	-0.0810575
109	p.Ala109Tyr	-0.100894	-0.0930329
109	p.Ala109Cys	-0.014097	-0.000141375
109	p.Ala109Trp	-0.217696	-0.00775835
109	p.Ala109Phe	-1.35435	-0.0043525
113	p.Leu113Asn	-5.05386	-6.01012
113	p.Leu113Lys	-1.25144	-0.0603613
113	p.Leu113Thr	-5.14557	-0.899682
113	p.Leu113Arg	-7.80724	-0.52252
113	p.Leu113Ser	-1.50018	-0.0432096
113	p.Leu113Ile	-3.54491	-0.0238587
113	p.Leu113Met	-0.348895	-8.33856
113	p.Leu113His	-10.7766	-7.02666
113	p.Leu113Gln	-2.71529	-2.57582e-09
113	p.Leu113Pro	-35.727	-22.3643
113	p.Leu113Leu	-1.06151	-1.06151
113	p.Leu113Asp	-2.78438	-0.74816
113	p.Leu113Glu	-0.479725	-1.20343
113	p.Leu113Ala	-5.31993	-21.1396
113	p.Leu113Gly	-2.61165	-6.24668
113	p.Leu113Val	-0.568998	-0.128791
113	p.Leu113Tyr	-4.4753	-0.307479
113	p.Leu113Cys	-1.24916	-0.9278
113	p.Leu113Trp	-1.31741	-4.25938
113	p.Leu113Phe	-8.78198	-8.92875
120	p.Glu120Asn	-2.64397	-0.99444
120	p.Glu120Lys	-2.2432	-1.50076
120	p.Glu120Thr	-2.98122	-0.0560934
120	p.Glu120Arg	-5.53	-2.95161
120	p.Glu120Ser	-2.99182	-0.434687
120	p.Glu120Ile	-7.14176	-0.554572
120	p.Glu120Met	-13.6945	-2.88416
120	p.Glu120His	-2.92851	-2.22851
120	p.Glu120Gln	-4.97937	-1.66001
120	p.Glu120Pro	-6.47833	-0.664955
120	p.Glu120Leu	-1.34518	-1.49914
120	p.Glu120Asp	-2.64116	-1.62479
120	p.Glu120Glu	-1.06151	-1.06151
120	p.Glu120Ala	-2.05849	-0.0100339
120	p.Glu120Gly	-3.67448	-0.148022
120	p.Glu120Val	-2.52763	-0.813937
120	p.Glu120Tyr	-7.40397	-7.88282
120	p.Glu120Cys	-2.11538	-0.528591
120	p.Glu120Trp	-4.43697	-0.26173
120	p.Glu120Phe	-0.624694	-0.0615106
122	p.Gly122Asn	-0.460774	-1.75725e-05
122	p.Gly122Lys	-1.46402	-0.000166205
122	p.Gly122Thr	-0.631245	-0.0167402
122	p.Gly122Arg	-2.8641	-1.50157
122	p.Gly122Ser	-0.203173	-0.0259814
122	p.Gly122Ile	-6.10241	-0.00775837
122	p.Gly122Met	-0.477643	-0.520535
122	p.Gly122His	-0.351865	-0.102409
122	p.Gly122Gln	-0.618824	-0.000896803
122	p.Gly122Pro	-0.888494	-2.6555
122	p.Gly122Leu	-2.34769	-0.00771443
122	p.Gly122Asp	-1.1101	-0.000500854
122	p.Gly122Glu	-1.38333	-0.000587142
122	p.Gly122Ala	-1.2271	-0.00815131
122	p.Gly122Gly	-1.06151	-1.06151
122	p.Gly122Val	-0.261169	-0.258716
122	p.Gly122Tyr	-0.793364	-0.953223
122	p.Gly122Cys	-6.2901	-0.861102
122	p.Gly122Trp	-0.331021	-7.6943
122	p.Gly122Phe	-2.71106	-0.302904
123	p.His123Asn	-6.16105	-2.66578
123	p.His123Lys	-0.235614	-1.18507
123	p.His123Thr	-17.5665	-13.5554
123	p.His123Arg	-3.02817	-2.46144
123	p.His123Ser	-5.21446	-1.45418
123	p.His123Ile	-6.24058	-2.4226
123	p.His123Met	-10.7276	-6.07955
123	p.His123His	-1.06151	-1.06151
123	p.His123Gln	-2.08624	-0.703933
123	p.His123Pro	-53.1508	-53.1508
123	p.His123Leu	-5.92934	-5.64231
123	p.His123Asp	-12.2126	-11.1162
123	p.His123Glu	-4.09649	-16.3785
123	p.His123Ala	-3.91111	-4.87227
123	p.His123Gly	-31.7842	-23.489
123	p.His123Val	-10.772	-21.5489
123	p.His123Tyr	-1.96814	-0.306935
123	p.His123Cys	-3.05872	-0.36311
123	p.His123Trp	-1.09571	-1.09539
123	p.His123Phe	-4.58178	-23.8583
124	p.Arg124Asn	-0.329232	-0.0257895
124	p.Arg124Lys	-1.11684	-0.870663
124	p.Arg124Thr	-1.77654	-9.90967
124	p.Arg124Arg	-1.06151	-1.06151
124	p.Arg124Ser	-0.42257	-0.00390706
124	p.Arg124Ile	-4.51743	-49.2996
124	p.Arg124Met	-0.922908	-4.1496e-09
124	p.Arg124His	-1.17044	-1.16394e-05
124	p.Arg124Gln	-0.814004	-0.0735113
124	p.Arg124Pro	-1.16766	-0.00405321
124	p.Arg124Leu	-1.1671	-0.31651
124	p.Arg124Asp	-0.354711	-0.000688323
124	p.Arg124Glu	-0.301015	-0.748866
124	p.Arg124Ala	-0.961744	-0.00381133
124	p.Arg124Gly	-9.59934	-4.91317
124	p.Arg124Val	-0.878975	-2.22568
124	p.Arg124Tyr	-0.411098	-19.0424
124	p.Arg124Cys	-2.99231	-0.000171358
124	p.Arg124Trp	-0.924321	-0.00561862
124	p.Arg124Phe	-0.271727	-0.444152
125	p.Asp125Asn	-1.78331	-0.117835
125	p.Asp125Lys	-0.302022	-0.023726
125	p.Asp125Thr	-0.01522	-0.0994636
125	p.Asp125Arg	-0.709556	-0.290834
125	p.Asp125Ser	-0.0503567	-1.06891
125	p.Asp125Ile	-0.0239393	-0.0164219
125	p.Asp125Met	-0.0324238	-0.156284
125	p.Asp125His	-0.465245	-0.0625499
125	p.Asp125Gln	-0.0365005	-0.0206867
125	p.Asp125Pro	-0.26327	-1.53611
125	p.Asp125Leu	-0.244107	-1.35127
125	p.Asp125Asp	-1.06151	-1.06151
125	p.Asp125Glu	-0.0518358	-1.12049
125	p.Asp125Ala	-0.0968148	-5.32526
125	p.Asp125Gly	-2.44077	-0.00449306
125	p.Asp125Val	-0.000161712	-0.0770295
125	p.Asp125Tyr	-29.6367	-37.0791
125	p.Asp125Cys	-0.962457	-0.000229366
125	p.Asp125Trp	-0.22896	-0.314521
125	p.Asp125Phe	-0.0478587	-1.95737
134	p.Ala134Asn	-0.588449	-0.0322678
134	p.Ala134Lys	-2.23648	-0.0723337
134	p.Ala134Thr	-0.686906	-3.78823
134	p.Ala134Arg	-4.25022	-6.80596e-09
134	p.Ala134Ser	-0.406755	-2.57261
134	p.Ala134Ile	-0.448854	-0.766533
134	p.Ala134Met	-0.813638	-0.152751
134	p.Ala134His	-0.503444	-0.141295
134	p.Ala134Gln	-0.750203	-0.293653
134	p.Ala134Pro	-1.61724	-0.0385298
134	p.Ala134Leu	-0.404001	-0.0100833
134	p.Ala134Asp	-0.292381	-0.279018
134	p.Ala134Glu	-0.555489	-5.8923e-05
134	p.Ala134Ala	-1.06151	-1.06151
134	p.Ala134Gly	-1.18383	-0.181447
134	p.Ala134Val	-0.317058	-0.287436
134	p.Ala134Tyr	-0.182854	-1.8304
134	p.Ala134Cys	-0.143942	-3.09781
134	p.Ala134Trp	-2.1514	-4.19368e-09
134	p.Ala134Phe	-0.392294	-0.0671177
136	p.Gly136Asn	-0.58392	-9.83754
136	p.Gly136Lys	-0.444209	-0.099266
136	p.Gly136Thr	-0.423207	-2.85181e-09
136	p.Gly136Arg	-0.343167	-0.02067
136	p.Gly136Ser	-0.772027	-7.10234
136	p.Gly136Ile	-1.54632	-0.000645191
136	p.Gly136Met	-0.632997	-4.03181e-05
136	p.Gly136His	-0.277638	-11.4055
136	p.Gly136Gln	-0.627052	-1.2574
136	p.Gly136Pro	-2.09112	-19.3064
136	p.Gly136Leu	-0.766225	-8.56723
136	p.Gly136Asp	-0.761344	-25.556
136	p.Gly136Glu	-1.08532	-0.00984011
136	p.Gly136Ala	-1.75505	-7.69904e-08
136	p.Gly136Gly	-1.06151	-1.06151
136	p.Gly136Val	-0.708296	-4.00396e-07
136	p.Gly136Tyr	-3.80157	-0.243419
136	p.Gly136Cys	-1.22838	-11.1288
136	p.Gly136Trp	-5.2708	-1.34945e-09
136	p.Gly136Phe	-0.768947	-4.73835
139	p.Gly139Asn	-2.29042	-2.33156
139	p.Gly139Lys	-1.71304	-5.42706
139	p.Gly139Thr	-1.27787	-9.45319
139	p.Gly139Arg	-0.359516	-2.97891
139	p.Gly139Ser	-3.32183	-3.4642
139	p.Gly139Ile	-0.627572	-2.23693
139	p.Gly139Met	-3.11493	-4.67673
139	p.Gly139His	-0.565119	-2.87856
139	p.Gly139Gln	-1.03435	-1.41615
139	p.Gly139Pro	-9.03217	-0.705234
139	p.Gly139Leu	-0.242287	-6.13008
139	p.Gly139Asp	-0.515726	-9.56556
139	p.Gly139Glu	-1.91986	-3.66246
139	p.Gly139Ala	-0.281435	-9.76402
139	p.Gly139Gly	-1.06151	-1.06151
139	p.Gly139Val	-0.238884	-0.80897
139	p.Gly139Tyr	-7.99528	-7.32871
139	p.Gly139Cys	-0.309172	-1.34781
139	p.Gly139Trp	-0.604303	-3.28349
139	p.Gly139Phe	-2.51769	-4.64085
153	p.Asp153Asn	-5.0174	-0.225341
153	p.Asp153Lys	-0.351254	-3.15835
153	p.Asp153Thr	-6.39624	-1.37611
153	p.Asp153Arg	-2.73875	-4.36616
153	p.Asp153Ser	-0.0418749	-0.010116
153	p.Asp153Ile	-0.219383	-1.7089
153	p.Asp153Met	-2.96301	-0.205803
153	p.Asp153His	-4.09647	-0.332775
153	p.Asp153Gln	-4.19159	-0.404461
153	p.Asp153Pro	-0.0368814	-0.000905431
153	p.Asp153Leu	-3.48093	-0.305322
153	p.Asp153Asp	-1.06151	-1.06151
153	p.Asp153Glu	-1.83953	-0.110394
153	p.Asp153Ala	-0.00248931	-0.461329
153	p.Asp153Gly	-0.0140661	-0.00220362
153	p.Asp153Val	-2.16942	-3.37894
153	p.Asp153Tyr	-0.745178	-5.68446
153	p.Asp153Cys	-3.86002	-1.03241
153	p.Asp153Trp	-2.31658	-2.54455
153	p.Asp153Phe	-0.636765	-1.00195
