# Supplementary material for: Functional characterization of all CDKN2A missense variants and comparison to in silico models of pathogenicity
Source: eLife. 2025 Apr 16;13:RP95347. doi: 10.7554/eLife.95347 (PMC12002794; doi:10.7554/eLife.95347)
Supplement: Figure 2—figure supplement 3—source data 2. [file elife-95347-fig2-figsupp3-data2.xlsx]

## Sheet: Figure 2-figure supplement 3B
		Exp_1
		Deleterious	Indeterminate	Neutral
Exp_2	Deleterious	33	1	0
	Indeterminate	5	34	42
	Neutral	0	60	385
