# Supplementary material for: Functional characterization of all CDKN2A missense variants and comparison to in silico models of pathogenicity
Source: eLife. 2025 Apr 16;13:RP95347. doi: 10.7554/eLife.95347 (PMC12002794; doi:10.7554/eLife.95347)
Supplement: Figure 2—figure supplement 4—source data 1. [file elife-95347-fig2-figsupp4-data1.xlsx]

## Sheet: Figure 2-figure supplement 4
	Total	Deleterious	Indeteminate or Neutral	Z_Score	P_Value	P_Value_Adj
<2	53	12	41	1.3	0.1936	1
2~3	171	28	143	0.034	0.97288	1
3~4	508	85	423	0.3	0.76418	1
4~5	881	142	739	-0.16	0.87288	1
5~6	880	137	743	-0.68	0.4965	1
6~7	385	69	316	0.93	0.35237	1
7~8	150	25	125	0.13	0.89657	1
>8	92	10	82	-1.4	0.16151	1
	Total	Deleterious	Indeteminate or Neutral
>2	2911	496	2415
