# Supplementary material for: Functional characterization of all CDKN2A missense variants and comparison to in silico models of pathogenicity
Source: eLife. 2025 Apr 16;13:RP95347. doi: 10.7554/eLife.95347 (PMC12002794; doi:10.7554/eLife.95347)
Supplement: Figure 2—figure supplement 5—source data 1. [file elife-95347-fig2-figsupp5-data1.xlsx]

## Sheet: Figure 2-figure supplement 5B
	Deleterious	Indeterminate	Neutral			Deleterious	Indeterminate or Neutral	Z_Score	P_Value	P_Value_Adj
11~40	126	143	331		11~40	126	474	3	0.0026998	0.013499
44~72	152	124	304		44~72	152	428	6.7	2.0842e-11	1.0421e-10
77~106	158	172	270		77~106	158	442	6.9	5.2003e-12	2.6001e-11
110~139	39	121	440		110~139	39	561	-7.5	6.3727e-14	3.1863e-13
Non AK	50	95	595		Non AK	50	690	-8.4	0	0
