# Supplementary material for: Functional characterization of all CDKN2A missense variants and comparison to in silico models of pathogenicity
Source: eLife. 2025 Apr 16;13:RP95347. doi: 10.7554/eLife.95347 (PMC12002794; doi:10.7554/eLife.95347)
Supplement: Figure 2—figure supplement 5—source data 2. [file elife-95347-fig2-figsupp5-data2.xlsx]

## Sheet: Figure 2-figure supplement 5C
Residue	Nember of deleterious variant
1	0
2	0
3	1
4	1
5	1
6	2
7	0
8	0
9	0
10	0
11	0
12	0
13	0
14	0
15	0
16	13
17	9
18	1
19	1
20	15
21	13
22	2
23	17
24	1
25	1
26	0
27	1
28	11
29	1
30	3
31	2
32	10
33	0
34	0
35	6
36	2
37	1
38	10
39	4
40	2
41	0
42	13
43	0
44	0
45	1
46	4
47	1
48	13
49	12
50	10
51	12
52	2
53	9
54	0
55	17
56	3
57	0
58	0
59	11
60	7
61	1
62	0
63	16
64	1
65	1
66	1
67	3
68	10
69	2
70	3
71	12
72	0
73	0
74	15
75	0
76	0
77	0
78	0
79	1
80	2
81	15
82	6
83	17
84	18
85	1
86	13
87	6
88	1
89	17
90	0
91	1
92	0
93	4
94	10
95	1
96	1
97	13
98	1
99	1
100	2
101	5
102	16
103	0
104	2
105	4
106	0
107	0
108	16
109	1
110	0
111	3
112	1
113	1
114	15
115	0
116	1
117	0
118	0
119	0
120	0
121	1
122	0
123	2
124	0
125	1
126	5
127	1
128	1
129	1
130	4
131	1
132	1
133	0
134	0
135	0
136	0
137	0
138	0
139	0
140	0
141	0
142	0
143	0
144	0
145	0
146	0
147	0
148	0
149	0
150	0
151	0
152	0
153	0
154	0
155	0
156	0
