# Supplementary material for: Functional characterization of all CDKN2A missense variants and comparison to in silico models of pathogenicity
Source: eLife. 2025 Apr 16;13:RP95347. doi: 10.7554/eLife.95347 (PMC12002794; doi:10.7554/eLife.95347)
Supplement: Figure 2—source data 1. [file elife-95347-fig2-data1.xlsx]

## Sheet: Raw data in Figure 2B
Residue	Variant	Benchmark	Variant of uncertain significance	Log2 P value	Fucntional characterization
9	p.Met9Thr		Neutral	-0.271973	Neutral
11	p.Pro11Leu		Neutral	-1.78338	Neutral
16	p.Leu16Arg	Pathogenic		-53.1508	Deleterious
16	p.Leu16Pro	Pathogenic		-53.1508	Deleterious
18	p.Thr18Pro		Deleterious	-53.1508	Deleterious
20	p.Ala20Pro		Deleterious	-53.1508	Deleterious
20	p.Ala20Gly		Deleterious	-53.1508	Deleterious
23	p.Gly23Arg	Likely pathogenic		-53.1508	Deleterious
23	p.Gly23Ser	Likely pathogenic		-53.1508	Deleterious
23	p.Gly23Asp	Pathogenic		-53.1508	Deleterious
24	p.Arg24Pro	Pathogenic		-53.1508	Deleterious
32	p.Leu32Pro	Pathogenic		-53.1508	Deleterious
35	p.Gly35Val		Deleterious	-53.1508	Deleterious
35	p.Gly35Trp		Deleterious	-53.1508	Deleterious
35	p.Gly35Arg		Neutral	-2.41954	Neutral
35	p.Gly35Glu		Neutral	-10.4093	Indeterminate
41	p.Pro41Gln		Neutral	-2.48365	Neutral
48	p.Pro48Thr	Pathogenic		-19.3017	Indeterminate
49	p.Ile49Thr	Likely pathogenic		-29.951	Indeterminate
49	p.Ile49Ser	Likely pathogenic		-53.1508	Deleterious
50	p.Gln50Arg		Deleterious	-53.1508	Deleterious
53	p.Met53Val	Likely pathogenic		-53.1508	Deleterious
53	p.Met53Ile	Pathogenic		-53.1508	Deleterious
56	p.Ser56Ile	Pathogenic		-53.1508	Deleterious
57	p.Ala57Val	Likely benign		-0.16147	Neutral
59	p.Val59Gly	Pathogenic		-33.2172	Indeterminate
60	p.Ala60Arg		Deleterious	-53.1508	Deleterious
60	p.Ala60Glu	Likely pathogenic		-33.2193	Indeterminate
65	p.Leu65Pro	Likely pathogenic		-53.1508	Deleterious
66	p.His66Pro		Deleterious	-53.1508	Deleterious
66	p.His66Arg		Neutral	-1.93155	Neutral
67	p.Gly67Arg		Neutral	-0.00244498	Neutral
68	p.Ala68Leu	Likely pathogenic		-53.1508	Deleterious
71	p.Asn71Lys		Deleterious	-53.1508	Deleterious
71	p.Asn71Ile		Deleterious	-53.1508	Deleterious
71	p.Asn71Ser	Likely pathogenic		-53.1508	Deleterious
74	p.Asp74Ala		Deleterious	-53.1508	Deleterious
74	p.Asp74Tyr		Deleterious	-53.1508	Deleterious
74	p.Asp74His		Neutral	-5.47159	Neutral
77	p.Thr77Pro		Deleterious	-33.2185	Indeterminate
81	p.Pro81Thr		Deleterious	-33.2193	Indeterminate
81	p.Pro81Leu		Deleterious	-53.1508	Deleterious
83	p.His83Asp	Likely pathogenic		-53.1508	Deleterious
83	p.His83Tyr	Likely pathogenic		-53.1508	Deleterious
83	p.His83Arg	Pathogenic		-53.1508	Deleterious
84	p.Asp84His		Deleterious	-53.1508	Deleterious
84	p.Asp84Ala		Deleterious	-53.1508	Deleterious
84	p.Asp84Gly		Deleterious	-53.1508	Deleterious
84	p.Asp84Val		Deleterious	-53.1508	Deleterious
84	p.Asp84Tyr		Deleterious	-53.1508	Deleterious
84	p.Asp84Asn	Likely pathogenic		-53.1508	Deleterious
87	p.Arg87Trp	Likely pathogenic		-53.1508	Deleterious
87	p.Arg87Pro	Pathogenic		-53.1508	Deleterious
88	p.Glu88Lys		Deleterious	-26.5472	Indeterminate
89	p.Gly89Asp		Deleterious	-53.1508	Deleterious
94	p.Leu94Gln	Likely pathogenic		-53.1508	Deleterious
94	p.Leu94Pro	Likely pathogenic		-53.1508	Deleterious
97	p.Leu97Arg		Deleterious	-53.1508	Deleterious
98	p.His98Pro		Deleterious	-53.1508	Deleterious
99	p.Arg99Gly		Neutral	-1.22054	Neutral
99	p.Arg99Pro	Likely pathogenic		-53.1508	Deleterious
100	p.Ala100Pro		Deleterious	-53.1508	Deleterious
100	p.Ala100Ser	Likely benign		-0.00877295	Neutral
101	p.Gly101Arg		Neutral	-10.3263	Indeterminate
101	p.Gly101Trp	Pathogenic		-53.1508	Deleterious
108	p.Asp108His		Deleterious	-53.1508	Deleterious
108	p.Asp108Tyr		Deleterious	-53.1508	Deleterious
108	p.Asp108Asn		Neutral	-0.777142	Neutral
109	p.Ala109Pro		Deleterious	-53.1508	Deleterious
111	p.Gly111Ser		Neutral	-0.29542	Neutral
112	p.Arg112Gly	Pathogenic		-29.4171	Indeterminate
114	p.Pro114Leu		Deleterious	-53.1508	Deleterious
114	p.Pro114Thr	Likely pathogenic		-53.1508	Deleterious
114	p.Pro114His	Likely pathogenic		-53.1508	Deleterious
122	p.Gly122Val		Neutral	-0.0758999	Neutral
123	p.His123Gln	Likely benign		-1.2373	Neutral
124	p.Arg124Cys		Neutral	-1.37226	Neutral
125	p.Asp125His		Neutral	-0.0780069	Neutral
126	p.Val126Asp	Pathogenic		-53.1508	Deleterious
127	p.Ala127Pro		Deleterious	-53.1508	Deleterious
127	p.Ala127Ser	Benign		-2.10384	Neutral
128	p.Arg128Pro		Deleterious	-53.1508	Deleterious
134	p.Ala134Thr		Neutral	-2.43883	Neutral
139	p.Gly139Arg		Neutral	-1.60984	Neutral
143	p.Ala143Thr		Neutral	-0.476776	Neutral
144	p.Arg144Cys	Benign		-0.0260657	Neutral
148	p.Ala148Thr	Benign		-1.31617	Neutral
