# Supplementary material for: Functional characterization of all CDKN2A missense variants and comparison to in silico models of pathogenicity
Source: eLife. 2025 Apr 16;13:RP95347. doi: 10.7554/eLife.95347 (PMC12002794; doi:10.7554/eLife.95347)
Supplement: Figure 3—figure supplement 1—source data 1. [file elife-95347-fig3-figsupp1-data1.xlsx]

## Sheet: Figure 3-figure supplement 1AB
	Number of algorithms predicting deleterious effect	0	1	2	3	4	5	6	7
Number of variant	Total	170	117	141	98	92	110	125	34
	Deleterious	3	4	6	2	8	29	65	35
	Indeterminate or neutral	167	113	135	96	84	81	60	36
