# Supplementary material for: Functional characterization of all CDKN2A missense variants and comparison to in silico models of pathogenicity
Source: eLife. 2025 Apr 16;13:RP95347. doi: 10.7554/eLife.95347 (PMC12002794; doi:10.7554/eLife.95347)
Supplement: Figure 3—figure supplement 1—source data 2. [file elife-95347-fig3-figsupp1-data2.xlsx]

## Sheet: Figure 3-figure supplement 1C
	Number of varaiants
Number of algorithms predicting deleterious effect	Ank1	Ank2	Ank3	Ank4	Non Ank
0	29	16	2	35	88
1	22	10	6	25	54
2	29	28	23	21	40
3	20	10	26	23	19
4	22	22	24	24	0
5	19	30	38	19	4
6	20	39	33	16	17
7	9	15	17	10	0
