# Supplementary material for: Functional characterization of all CDKN2A missense variants and comparison to in silico models of pathogenicity
Source: eLife. 2025 Apr 16;13:RP95347. doi: 10.7554/eLife.95347 (PMC12002794; doi:10.7554/eLife.95347)
Supplement: Figure 3—figure supplement 1—source data 3. [file elife-95347-fig3-figsupp1-data3.xlsx]

## Sheet: Figure 3-figure supplement 1D-H
Ank1		Number of algorithms predicting deleterious effect	0	1	2	3	4	5	6	7
	Number of variants	Total	29	22	29	20	22	19	20	9
		Deleterious	1	2	3	0	0	6	14	7
		Indterminate or neutral	28	20	26	20	22	13	6	2
Ank2		Number of algorithms predicting deleterious effect	0	1	2	3	4	5	6	7
	Number of variants	Total	16	10	28	10	22	30	39	15
		Deleterious	0	0	0	0	4	4	18	10
		Indterminate or neutral	16	10	28	10	18	26	21	5
Ank3		Number of algorithms predicting deleterious effect	0	1	2	3	4	5	6	7
	Number of variants	Total	2	6	23	26	24	38	33	17
		Deleterious	1	0	2	0	3	14	16	13
		Indterminate or neutral	1	6	21	26	21	24	17	4
Ank4		Number of algorithms predicting deleterious effect	0	1	2	3	4	5	6	7
	Number of variants	Total	35	25	21	23	24	19	16	10
		Deleterious	0	2	0	1	1	3	5	5
		Indterminate or neutral	35	23	21	22	23	16	11	5
Non Ank		Number of algorithms predicting deleterious effect	0	1	2	3	4	5	6	7
	Number of variants	Total	88	54	40	19	0	4	17	0
		Deleterious	1	0	1	1	0	2	12	0
		Indterminate or neutral	87	54	39	18	0	2	5	0
