# Supplementary material for: Functional characterization of all CDKN2A missense variants and comparison to in silico models of pathogenicity
Source: eLife. 2025 Apr 16;13:RP95347. doi: 10.7554/eLife.95347 (PMC12002794; doi:10.7554/eLife.95347)
Supplement: Figure 3—figure supplement 2—source data 1. [file elife-95347-fig3-figsupp2-data1.xlsx]

## Sheet: Figure 3-figure supplement 2AB
	Number of algorithms predicting deleterious effect	0	1	2	3	4	5
Number of variant	Total	200	358	395	257	271	579
	Deleterious	1	3	8	11	55	295
	Indeterminate or neutral	199	355	387	246	216	284
