# Supplementary material for: Functional characterization of all CDKN2A missense variants and comparison to in silico models of pathogenicity
Source: eLife. 2025 Apr 16;13:RP95347. doi: 10.7554/eLife.95347 (PMC12002794; doi:10.7554/eLife.95347)
Supplement: Figure 3—figure supplement 2—source data 2. [file elife-95347-fig3-figsupp2-data2.xlsx]

## Sheet: Figure 3-figure supplement 2C
	Number of varaiants
Number of algorithms predicting deleterious effect	Ank1	Ank2	Ank3	Ank4	Non Ank
0	39	6	1	48	106
1	70	33	24	75	156
2	74	48	61	73	139
3	61	41	65	53	37
4	49	86	78	51	7
5	107	167	172	97	36
