# Supplementary material for: Functional characterization of all CDKN2A missense variants and comparison to in silico models of pathogenicity
Source: eLife. 2025 Apr 16;13:RP95347. doi: 10.7554/eLife.95347 (PMC12002794; doi:10.7554/eLife.95347)
Supplement: Figure 3—figure supplement 2—source data 3. [file elife-95347-fig3-figsupp2-data3.xlsx]

## Sheet: Figure 3-sigure supplement 2D-H
Ank1		Number of algorithms predicting deleterious effect	0	1	2	3	4	5
	Number of variants	Total	39	70	74	61	49	107
		Deleterious	0	1	4	7	14	67
		Indterminate or neutral	39	69	70	54	35	40
Ank2		Number of algorithms predicting deleterious effect	0	1	2	3	4	5
	Number of variants	Total	6	33	48	41	86	167
		Deleterious	1	0	1	2	18	94
		Indterminate or neutral	5	33	47	39	68	73
Ank3		Number of algorithms predicting deleterious effect	0	1	2	3	4	5
	Number of variants	Total	1	24	61	65	78	172
		Deleterious	0	1	1	2	19	86
		Indterminate or neutral	1	23	60	63	59	86
Ank4		Number of algorithms predicting deleterious effect	0	1	2	3	4	5
	Number of variants	Total	48	75	73	53	51	97
		Deleterious	0	0	0	0	3	19
		Indterminate or neutral	48	75	73	53	48	78
Non Ank		Number of algorithms predicting deleterious effect	0	1	2	3	4	5
	Number of variants	Total	106	156	139	37	7	36
		Deleterious	0	1	2	0	1	29
		Indterminate or neutral	106	155	137	37	6	7
