# Supplementary material for: Functional characterization of all CDKN2A missense variants and comparison to in silico models of pathogenicity
Source: eLife. 2025 Apr 16;13:RP95347. doi: 10.7554/eLife.95347 (PMC12002794; doi:10.7554/eLife.95347)
Supplement: Figure 3—source data 1. [file elife-95347-fig3-data1.xlsx]

## Sheet: Figure 3
		Deleterious prediction	Neutral prediction	Total
CADD	Deleterious (assay result)	147	5	152
	Indeterminate (assay result)	151	45	196
	Neutral (assay result)	344	218	562
PolyPhen-2	Deleterious (assay result)	512	13	525
	Indeterminate (assay result)	550	105	655
	Neutral (assay result)	1229	555	1784
SIFT	Deleterious (assay result)	417	108	525
	Indeterminate (assay result)	333	322	655
	Neutral (assay result)	718	1066	1784
VEST	Deleterious (assay result)	477	48	525
	Indeterminate (assay result)	309	346	655
	Neutral (assay result)	475	1309	1784
AlphaMisssense	Deleterious (assay result)	492	33	525
	Indeterminate (assay result)	315	340	655
	Neutral (assay result)	495	1289	1784
ESM1b	Deleterious (assay result)	500	25	525
	Indeterminate (assay result)	412	243	655
	Neutral (assay result)	771	1013	1784
PrimateAI-3D	Deleterious (assay result)	38	114	152
	Indeterminate (assay result)	14	182	196
	Neutral (assay result)	4	552	556
