# Supplementary material for: Functional characterization of all CDKN2A missense variants and comparison to in silico models of pathogenicity
Source: eLife. 2025 Apr 16;13:RP95347. doi: 10.7554/eLife.95347 (PMC12002794; doi:10.7554/eLife.95347)
Supplement: Figure 4—figure supplement 1—source data 1. [file elife-95347-fig4-figsupp1-data1.xlsx]

## Sheet: Figure 4-figure supplement 1AB
		Number of variants
Misssense somatic mutations by ACMG clasification	Pathogenic	26
	VUS	324
	Benign	5
		Number of variants
		COSMIC	TCGA	JHU	MSK-IMPACT
Misssense somatic mutations by ACMG clasification	Pathogenic	23	14	12	9
	VUS	287	89	85	74
	Benign	5	0	2	1
