# Supplementary material for: Functional characterization of all CDKN2A missense variants and comparison to in silico models of pathogenicity
Source: eLife. 2025 Apr 16;13:RP95347. doi: 10.7554/eLife.95347 (PMC12002794; doi:10.7554/eLife.95347)
Supplement: Figure 4—figure supplement 1—source data 2. [file elife-95347-fig4-figsupp1-data2.xlsx]

## Sheet: Figure 4-figure supplement 1C
		Number of patients
		COSMIC	TCGA	JHU	MSK-IMPACT
Pathogenic variant	p.His83Tyr	139	18	17	32
	p.Asp84Asn	40	10	3	4
	Other	84	17	20	10
