# Supplementary material for: Functional characterization of all CDKN2A missense variants and comparison to in silico models of pathogenicity
Source: eLife. 2025 Apr 16;13:RP95347. doi: 10.7554/eLife.95347 (PMC12002794; doi:10.7554/eLife.95347)
Supplement: Figure 4—figure supplement 2—source data 1. [file elife-95347-fig4-figsupp2-data1.xlsx]

## Sheet: Figure-figure supplement 2A-D
COSMIC		Number of patients				TCGA		Number of patients				JHU		Number of patients				MSK-IMPACT		Number of patients
		Deleterious	Indeterminate	Neutral				Deleterious	Indeterminate	Neutral				Deleterious	Indeterminate	Neutral				Deleterious	Indeterminate	Neutral
Esophagus adenocarcinoma	EAC	13	2	2		Esophagus adenocarcinoma	EAC	3	0	1		Esophagus adenocarcinoma	EAC	0	0	0		Esophagus adenocarcinoma	EAC	7	1	1
Esophagus SCC	ESCC	46	8	15		Esophagus SCC	ESCC	1	0	0		Esophagus SCC	ESCC	0	0	0		Esophagus SCC	ESCC	0	0	0
Stomach adenocarcinoma	STAD	10	2	2		Stomach adenocarcinoma	STAD	6	2	2		Stomach adenocarcinoma	STAD	0	0	0		Stomach adenocarcinoma	STAD	1	0	0
Hepatocellular carcinoma	HCC	15	2	8		Hepatocellular carcinoma	HCC	5	0	1		Hepatocellular carcinoma	HCC	0	0	0		Hepatocellular carcinoma	HCC	0	0	0
Biliary tract cancer	BTC	26	11	21		Biliary tract cancer	BTC	1	1	0		Biliary tract cancer	BTC	0	0	0		Biliary tract cancer	BTC	4	0	1
PDAC	PDAC	70	10	17		PDAC	PDAC	14	1	1		PDAC	PDAC	7	0	3		PDAC	PDAC	14	2	1
Colorectal adenocarcinoma	CRC	6	10	20		Colorectal adenocarcinoma	CRC	0	0	1		Colorectal adenocarcinoma	CRC	4	4	5		Colorectal adenocarcinoma	CRC	2	2	5
Non small cell lung cancer	NSCLC	18	4	2		Non small cell lung cancer	NSCLC	0	0	0		Non small cell lung cancer	NSCLC	11	0	4		Non small cell lung cancer	NSCLC	4	1	0
Lung adenocarcinoma	LUAD	44	10	37		Lung adenocarcinoma	LUAD	18	0	5		Lung adenocarcinoma	LUAD	52	12	12		Lung adenocarcinoma	LUAD	19	7	7
Lung scc	LUSCC	49	3	11		Lung scc	LUSCC	28	3	3		Lung scc	LUSCC	0	0	0		Lung scc	LUSCC	6	0	1
GBM, Glioblastoma multiforme	GBM	7	6	5		GBM, Glioblastoma multiforme	GBM	0	1	1		GBM, Glioblastoma multiforme	GBM	0	1	1		GBM, Glioblastoma multiforme	GBM	3	1	0
Head and neck SCC	HNSCC	38	5	11		Head and neck SCC	HNSCC	13	1	4		Head and neck SCC	HNSCC	0	0	0		Head and neck SCC	HNSCC	3	0	0
Larynx carcinoma	LC	19	3	8		Larynx carcinoma	LC	0	0	0		Larynx carcinoma	LC	0	0	0		Larynx carcinoma	LC	0	0	0
Melanoma	MM	103	17	23		Melanoma	MM	19	3	1		Melanoma	MM	21	4	3		Melanoma	MM	13	5	3
Skin cancer-non melanoma	NMSC	43	10	21		Skin cancer-non melanoma	NMSC	0	0	0		Skin cancer-non melanoma	NMSC	0	0	0		Skin cancer-non melanoma	NMSC	7	1	2
Bladder urothelial carcinoma	BLCA	32	6	17		Bladder urothelial carcinoma	BLCA	8	2	7		Bladder urothelial carcinoma	BLCA	0	0	0		Bladder urothelial carcinoma	BLCA	9	1	2
Ovary carcinoma	OVCA	21	3	15		Ovary carcinoma	OVCA	1	0	1		Ovary carcinoma	OVCA	0	0	0		Ovary carcinoma	OVCA	3	0	0
Breast cancer	BC	22	3	8		Breast cancer	BC	2	1	1		Breast cancer	BC	1	0	0		Breast cancer	BC	8	1	5
