# Supplementary material for: Functional characterization of all CDKN2A missense variants and comparison to in silico models of pathogenicity
Source: eLife. 2025 Apr 16;13:RP95347. doi: 10.7554/eLife.95347 (PMC12002794; doi:10.7554/eLife.95347)
Supplement: Figure 4—source data 1. [file elife-95347-fig4-data1.xlsx]

## Sheet: Figure 4A and B
Number of variants	COSMIC	TCGA	JHU	MSK-IMPACT
Deleterious	108	55	50	42
Indeterminate	69	15	15	14
Neutral	138	33	34	28
Total	315	103	99	84
Number of patients	COSMIC	TCGA	JHU	MSK-IMPACT
Deleterious	710	125	116	112
Indeterminate	152	21	24	23
Neutral	294	39	44	39
Total	1156	185	184	174
Number of deleterious variants	COSMIC	TCGA	JHU	MSK-IMPACT
Ank1	23	10	1	5
Ank2	24	11	10	7
Ank3	35	20	25	20
Ank4	12	5	7	4
Non Ank	14	9	7	6
Total	108	55	50	42
Number of patients with deleterious variants	COSMIC	TCGA	JHU	MSK-IMPACT
Ank1	55	10	1	6
Ank2	87	17	14	13
Ank3	360	60	67	65
Ank4	107	19	19	14
Non Ank	101	19	15	14
Total	710	125	116	112
