# Supplementary material for: Functional characterization of all CDKN2A missense variants and comparison to in silico models of pathogenicity
Source: eLife. 2025 Apr 16;13:RP95347. doi: 10.7554/eLife.95347 (PMC12002794; doi:10.7554/eLife.95347)
Supplement: Figure 4—source data 2. [file elife-95347-fig4-data2.xlsx]

## Sheet: Figure 4C
		Deleterious	Indeterminate	Neutral				Deleterious	Indeterminate or Neutral	Z_Score	P_Value	P_Value_Adj
Esophagus adenocarcinoma	EAC	16	2	3		Esophagus adenocarcinoma	EAC	16	5	1.3	0.1936	1
Esophagus SCC	ESCC	47	8	15		Esophagus SCC	ESCC	47	23	0.79	0.42953	1
Stomach adenocarcinoma	STAD	10	2	2		Stomach adenocarcinoma	STAD	10	4	0.68	0.4965	1
Hepatocellular carcinoma	HCC	15	2	8		Hepatocellular carcinoma	HCC	15	10	-0.28	0.77948	1
Biliary tract cancer	BTC	27	12	21		Biliary tract cancer	BTC	27	33	-2.9	0.0037316	0.067169
PDAC	PDAC	86	11	20		PDAC	PDAC	86	31	2.6	0.0093224	0.1678
Colorectal adenocarcinoma	CRC	10	14	25		Colorectal adenocarcinoma	CRC	10	39	-6.3	2.9765e-10	5.3576e-09
Non small cell lung cancer	NSCLC	29	4	6		Non small cell lung cancer	NSCLC	29	10	1.5	0.13361	1
Lung adenocarcinoma	LUAD	101	22	51		Lung adenocarcinoma	LUAD	101	73	-1.4	0.16151	1
Lung scc	LUSCC	53	4	12		Lung scc	LUSCC	53	16	2.5	0.012419	0.22355
GBM, Glioblastoma multiforme	GBM	7	7	7		GBM, Glioblastoma multiforme	GBM	7	14	-2.8	0.0051103	0.091985
Head and neck SCC	HNSCC	38	5	11		Head and neck SCC	HNSCC	38	16	1.2	0.23014	1
Larynx carcinoma	LC	19	3	8		Larynx carcinoma	LC	19	11	0.071	0.9434	1
Melanoma	MM	124	21	26		Melanoma	MM	124	47	2.9	0.0037316	0.067169
Skin cancer-non melanoma	NMSC	43	10	21		Skin cancer-non melanoma	NMSC	43	31	-0.85	0.39533	1
Bladder urothelial carcinoma	BLCA	32	6	17		Bladder urothelial carcinoma	BLCA	32	23	-0.71	0.4777	1
Ovary carcinoma	OVCA	21	3	16		Ovary carcinoma	OVCA	21	19	-1.4	0.16151	1
Breast cancer	BC	25	4	9		Breast cancer	BC	25	13	0.4	0.68916	1
