# Supplementary material for: Functional characterization of all CDKN2A missense variants and comparison to in silico models of pathogenicity
Source: eLife. 2025 Apr 16;13:RP95347. doi: 10.7554/eLife.95347 (PMC12002794; doi:10.7554/eLife.95347)
Supplement: Supplementary file 1. [file elife-95347-supp1.xlsx]

## Sheet: Appendix 1-table 1
Supplementary File 1. Assay outputs for CellTag experiments.
CellTag number	Experiment 1				Experiment 2				Experiment 3				Proprotion
	Read count		Proportion		Read count		Proportion		Read count		Proportion
	Day 9	Day 45	Day 9	Day 45	Day 9	Day 45	Day 9	Day 45	Day 9	Day 45	Day 9	Day 45	Mean Day 9	Mean Day 45	Standard deviation Day 9	Standard deviation Day 45
CellTag1	18886	7358	4.68441	4.39525	9135	7518	4.4887	4.24499	9860	6608	4.38031	4.42196	4.51781	4.35407	0.154124	0.095404
CellTag2	22571	9930	5.59842	5.93162	11498	10239	5.64982	5.78138	12373	8001	5.49672	5.35413	5.58165	5.68904	0.077916	0.299611
CellTag3	18731	8318	4.64597	4.9687	9439	9057	4.63808	5.11397	11058	7363	4.91253	4.92719	4.73219	5.00329	0.156226	0.0980767
CellTag4	25031	10273	6.20859	6.1365	13022	10865	6.39867	6.13485	13515	9318	6.00405	6.23545	6.20377	6.16893	0.197354	0.0576075
CellTag5	18034	8229	4.47308	4.91554	9654	8455	4.74372	4.77406	10665	6944	4.73794	4.64681	4.65158	4.7788	0.15461	0.134428
CellTag6	21130	8923	5.241	5.33009	10702	9912	5.25868	5.59674	12738	8179	5.65887	5.47325	5.38619	5.46669	0.236316	0.133446
CellTag7	17421	8023	4.32104	4.79248	9086	8475	4.46462	4.78535	9867	7113	4.38342	4.7599	4.3897	4.77924	0.0719978	0.0171299
CellTag8	19780	8156	4.90616	4.87193	9708	8955	4.77026	5.05638	11174	7404	4.96406	4.95463	4.88016	4.96098	0.0994822	0.0923888
CellTag9	20872	8931	5.17701	5.33487	10628	9194	5.22232	5.19133	11859	7849	5.26837	5.25242	5.22257	5.25954	0.045681	0.0720352
CellTag10	19441	7610	4.82207	4.54578	10308	7461	5.06508	4.2128	10458	7297	4.64598	4.88303	4.84438	4.5472	0.210441	0.335114
CellTag11	24278	10397	6.02182	6.21058	12258	11333	6.02326	6.3991	14086	9108	6.25772	6.09492	6.10093	6.23486	0.135781	0.15354
CellTag12	26268	11069	6.51541	6.61199	13209	11494	6.49056	6.49001	14782	9871	6.56692	6.6055	6.5243	6.56917	0.0389469	0.0686301
CellTag13	18378	7440	4.55841	4.44423	8926	8197	4.386	4.62838	9626	6363	4.27636	4.25801	4.40692	4.44354	0.142184	0.185186
CellTag14	26288	9801	6.52037	5.85456	12418	11095	6.10188	6.26472	14185	8737	6.3017	5.84665	6.30799	5.98864	0.209318	0.23912
CellTag15	23881	9917	5.92335	5.92385	12073	11203	5.93236	6.3257	13775	8986	6.11956	6.01328	5.99176	6.08761	0.110771	0.210984
CellTag16	15131	6019	3.75304	3.59541	7421	6208	3.64649	3.5053	8175	5532	3.63175	3.70192	3.67709	3.60088	0.0661811	0.0984212
CellTag17	5094	1861	1.2635	1.11166	2598	1787	1.27659	1.00902	2788	1607	1.23857	1.07538	1.25955	1.06535	0.0193133	0.0520485
CellTag18	25447	10259	6.31178	6.12814	12235	10417	6.01196	5.88189	13537	9539	6.01383	6.38333	6.11252	6.13112	0.172563	0.250737
CellTag19	25280	10523	6.27035	6.28584	13419	10627	6.59375	6.00046	14407	9221	6.40032	6.17053	6.42147	6.15228	0.16273	0.143562
CellTag20	11225	4371	2.78421	2.61099	5774	4611	2.83719	2.60357	6170	4396	2.74103	2.94173	2.78748	2.71876	0.0481657	0.19313
