# Supplementary material for: Functional characterization of all CDKN2A missense variants and comparison to in silico models of pathogenicity
Source: eLife. 2025 Apr 16;13:RP95347. doi: 10.7554/eLife.95347 (PMC12002794; doi:10.7554/eLife.95347)
Supplement: Supplementary file 2. [file elife-95347-supp2.xlsx]

## Sheet: Appendix 1-table 2
Supplementary File 2. Proportion of each variant in the initial plasmid library.
Residue	Variant	Respresentation in library (%)
1	p.Met1Asn	4.97581
1	p.Met1Lys	6.70352
1	p.Met1Thr	5.16932
1	p.Met1Arg	4.45059
1	p.Met1Ser	4.57498
1	p.Met1Ile	6.15066
1	p.Met1Met	0
1	p.Met1His	4.56116
1	p.Met1Gln	4.22944
1	p.Met1Pro	4.47823
1	p.Met1Leu	10.6427
1	p.Met1Asp	4.34001
1	p.Met1Glu	4.38148
1	p.Met1Ala	4.57498
1	p.Met1Gly	4.09122
1	p.Met1Val	8.63856
1	p.Met1Tyr	4.3953
1	p.Met1Cys	4.50587
1	p.Met1Trp	4.50587
1	p.Met1Phe	4.63027
2	p.Glu2Asn	3.3
2	p.Glu2Lys	3.4
2	p.Glu2Thr	2.6
2	p.Glu2Arg	2.8
2	p.Glu2Ser	2
2	p.Glu2Ile	3.9
2	p.Glu2Met	2.9
2	p.Glu2His	3.7
2	p.Glu2Gln	4.8
2	p.Glu2Pro	3.7
2	p.Glu2Leu	3.4
2	p.Glu2Asp	26.3
2	p.Glu2Glu	12.6
2	p.Glu2Ala	4.1
2	p.Glu2Gly	3.4
2	p.Glu2Val	3.4
2	p.Glu2Tyr	2.8
2	p.Glu2Cys	3.3
2	p.Glu2Trp	3.7
2	p.Glu2Phe	3.8
3	p.Pro3Asn	4.7
3	p.Pro3Lys	3.5
3	p.Pro3Thr	7.5
3	p.Pro3Arg	4.2
3	p.Pro3Ser	4.3
3	p.Pro3Ile	3.9
3	p.Pro3Met	3.3
3	p.Pro3His	9.4
3	p.Pro3Gln	3.6
3	p.Pro3Pro	9.6
3	p.Pro3Leu	4.3
3	p.Pro3Asp	4.6
3	p.Pro3Glu	4.5
3	p.Pro3Ala	6
3	p.Pro3Gly	5.4
3	p.Pro3Val	4.7
3	p.Pro3Tyr	3.4
3	p.Pro3Cys	4.4
3	p.Pro3Trp	3.8
3	p.Pro3Phe	4.9
4	p.Ala4Asn	4.8
4	p.Ala4Lys	3.4
4	p.Ala4Thr	8.7
4	p.Ala4Arg	4.3
4	p.Ala4Ser	4.1
4	p.Ala4Ile	3.4
4	p.Ala4Met	3.6
4	p.Ala4His	5.8
4	p.Ala4Gln	3.9
4	p.Ala4Pro	4.6
4	p.Ala4Leu	3.9
4	p.Ala4Asp	10.1
4	p.Ala4Glu	3.7
4	p.Ala4Ala	8.5
4	p.Ala4Gly	6
4	p.Ala4Val	5.2
4	p.Ala4Tyr	3.6
4	p.Ala4Cys	4.2
4	p.Ala4Trp	4.5
4	p.Ala4Phe	3.7
5	p.Ala5Asn	6.2
5	p.Ala5Lys	4
5	p.Ala5Thr	4.5
5	p.Ala5Arg	4.5
5	p.Ala5Ser	4.3
5	p.Ala5Ile	6
5	p.Ala5Met	4.4
5	p.Ala5His	5.1
5	p.Ala5Gln	5.7
5	p.Ala5Pro	5.1
5	p.Ala5Leu	6.4
5	p.Ala5Asp	5.7
5	p.Ala5Glu	4.5
5	p.Ala5Ala	7.9
5	p.Ala5Gly	3.6
5	p.Ala5Val	6.2
5	p.Ala5Tyr	2.8
5	p.Ala5Cys	3.6
5	p.Ala5Trp	5.9
5	p.Ala5Phe	3.4
6	p.Gly6Asn	4.3
6	p.Gly6Lys	4.5
6	p.Gly6Thr	4
6	p.Gly6Arg	4
6	p.Gly6Ser	6.7
6	p.Gly6Ile	2.7
6	p.Gly6Met	4.3
6	p.Gly6His	2.7
6	p.Gly6Gln	3.5
6	p.Gly6Pro	3.6
6	p.Gly6Leu	4.3
6	p.Gly6Asp	8.4
6	p.Gly6Glu	3.8
6	p.Gly6Ala	6.6
6	p.Gly6Gly	10
6	p.Gly6Val	5
6	p.Gly6Tyr	3.3
6	p.Gly6Cys	11
6	p.Gly6Trp	4.3
6	p.Gly6Phe	3.1
7	p.Ser7Asn	5.6
7	p.Ser7Lys	5.9
7	p.Ser7Thr	7.3
7	p.Ser7Arg	6.7
7	p.Ser7Ser	3.4
7	p.Ser7Ile	5.6
7	p.Ser7Met	7.3
7	p.Ser7His	6.7
7	p.Ser7Gln	6.1
7	p.Ser7Pro	8.9
7	p.Ser7Leu	6.6
7	p.Ser7Asp	3.7
7	p.Ser7Glu	1.5
7	p.Ser7Ala	4.3
7	p.Ser7Gly	0.9
7	p.Ser7Val	2.6
7	p.Ser7Tyr	4.1
7	p.Ser7Cys	4.3
7	p.Ser7Trp	3.6
7	p.Ser7Phe	4.8
8	p.Ser8Asn	5.5
8	p.Ser8Lys	4.3
8	p.Ser8Thr	6
8	p.Ser8Arg	5.9
8	p.Ser8Ser	6.1
8	p.Ser8Ile	6.2
8	p.Ser8Met	3.4
8	p.Ser8His	3.7
8	p.Ser8Gln	4.7
8	p.Ser8Pro	4.8
8	p.Ser8Leu	4.8
8	p.Ser8Asp	5.6
8	p.Ser8Glu	4.6
8	p.Ser8Ala	4.2
8	p.Ser8Gly	4.7
8	p.Ser8Val	5.6
8	p.Ser8Tyr	4.4
8	p.Ser8Cys	4.5
8	p.Ser8Trp	6.1
8	p.Ser8Phe	4.6
9	p.Met9Asn	4.6
9	p.Met9Lys	7
9	p.Met9Thr	5.1
9	p.Met9Arg	6.4
9	p.Met9Ser	4
9	p.Met9Ile	5.9
9	p.Met9Met	0
9	p.Met9His	3.1
9	p.Met9Gln	4.1
9	p.Met9Pro	3.9
9	p.Met9Leu	6.8
9	p.Met9Asp	4.9
9	p.Met9Glu	4.6
9	p.Met9Ala	4.6
9	p.Met9Gly	4.2
9	p.Met9Val	8.6
9	p.Met9Tyr	6.1
9	p.Met9Cys	5.6
9	p.Met9Trp	5.2
9	p.Met9Phe	5.5
10	p.Glu10Asn	3.5
10	p.Glu10Lys	4.9
10	p.Glu10Thr	2.5
10	p.Glu10Arg	4.9
10	p.Glu10Ser	2.6
10	p.Glu10Ile	3.4
10	p.Glu10Met	5.9
10	p.Glu10His	3.2
10	p.Glu10Gln	4.8
10	p.Glu10Pro	4.8
10	p.Glu10Leu	3.2
10	p.Glu10Asp	13.4
10	p.Glu10Glu	10.8
10	p.Glu10Ala	2.9
10	p.Glu10Gly	4.4
10	p.Glu10Val	4.6
10	p.Glu10Tyr	5.7
10	p.Glu10Cys	5.8
10	p.Glu10Trp	4
10	p.Glu10Phe	4.5
11	p.Pro11Asn	4.8
11	p.Pro11Lys	3.7
11	p.Pro11Thr	4.9
11	p.Pro11Arg	4
11	p.Pro11Ser	4.9
11	p.Pro11Ile	5.1
11	p.Pro11Met	5.4
11	p.Pro11His	7
11	p.Pro11Gln	5.1
11	p.Pro11Pro	5.9
11	p.Pro11Leu	4.3
11	p.Pro11Asp	5.6
11	p.Pro11Glu	4.6
11	p.Pro11Ala	6.1
11	p.Pro11Gly	6
11	p.Pro11Val	5.3
11	p.Pro11Tyr	4.6
11	p.Pro11Cys	3.8
11	p.Pro11Trp	4.7
11	p.Pro11Phe	4.4
12	p.Ser12Asn	3.8
12	p.Ser12Lys	4.8
12	p.Ser12Thr	4
12	p.Ser12Arg	4.9
12	p.Ser12Ser	4.5
12	p.Ser12Ile	4.1
12	p.Ser12Met	6.3
12	p.Ser12His	4.9
12	p.Ser12Gln	6.4
12	p.Ser12Pro	5.9
12	p.Ser12Leu	6.5
12	p.Ser12Asp	5.4
12	p.Ser12Glu	4.6
12	p.Ser12Ala	3.5
12	p.Ser12Gly	4.4
12	p.Ser12Val	3.5
12	p.Ser12Tyr	4.8
12	p.Ser12Cys	5.3
12	p.Ser12Trp	6.1
12	p.Ser12Phe	6.2
13	p.Ala13Asn	4.9
13	p.Ala13Lys	4.3
13	p.Ala13Thr	5.1
13	p.Ala13Arg	6.3
13	p.Ala13Ser	5.3
13	p.Ala13Ile	4.6
13	p.Ala13Met	5.8
13	p.Ala13His	3.5
13	p.Ala13Gln	4.9
13	p.Ala13Pro	5.2
13	p.Ala13Leu	4.6
13	p.Ala13Asp	5.7
13	p.Ala13Glu	5.5
13	p.Ala13Ala	8.6
13	p.Ala13Gly	4.6
13	p.Ala13Val	4
13	p.Ala13Tyr	4.5
13	p.Ala13Cys	3.7
13	p.Ala13Trp	3.6
13	p.Ala13Phe	5.2
14	p.Asp14Asn	4.3
14	p.Asp14Lys	4.6
14	p.Asp14Thr	4.4
14	p.Asp14Arg	4.8
14	p.Asp14Ser	4.6
14	p.Asp14Ile	4.1
14	p.Asp14Met	3.6
14	p.Asp14His	3.9
14	p.Asp14Gln	5.6
14	p.Asp14Pro	4.3
14	p.Asp14Leu	5.2
14	p.Asp14Asp	7.1
14	p.Asp14Glu	11.9
14	p.Asp14Ala	4.3
14	p.Asp14Gly	5.6
14	p.Asp14Val	4.6
14	p.Asp14Tyr	4.5
14	p.Asp14Cys	4.4
14	p.Asp14Trp	5.1
14	p.Asp14Phe	3.3
15	p.Trp15Asn	5.6
15	p.Trp15Lys	5.3
15	p.Trp15Thr	3.3
15	p.Trp15Arg	5.8
15	p.Trp15Ser	6.9
15	p.Trp15Ile	3.4
15	p.Trp15Met	2.6
15	p.Trp15His	4.1
15	p.Trp15Gln	5
15	p.Trp15Pro	4.1
15	p.Trp15Leu	7.3
15	p.Trp15Asp	7.6
15	p.Trp15Glu	5.4
15	p.Trp15Ala	6.1
15	p.Trp15Gly	4.1
15	p.Trp15Val	3
15	p.Trp15Tyr	5.8
15	p.Trp15Cys	7.4
15	p.Trp15Trp	0
15	p.Trp15Phe	7.1
16	p.Leu16Asn	4.1
16	p.Leu16Lys	6.6
16	p.Leu16Thr	4.3
16	p.Leu16Arg	4.7
16	p.Leu16Ser	4.6
16	p.Leu16Ile	4.2
16	p.Leu16Met	4
16	p.Leu16His	7.6
16	p.Leu16Gln	5.6
16	p.Leu16Pro	10.2
16	p.Leu16Leu	2.8
16	p.Leu16Asp	3.4
16	p.Leu16Glu	5.4
16	p.Leu16Ala	3.9
16	p.Leu16Gly	4.7
16	p.Leu16Val	5.1
16	p.Leu16Tyr	4.3
16	p.Leu16Cys	4.5
16	p.Leu16Trp	4.8
16	p.Leu16Phe	5.2
17	p.Ala17Asn	4.6
17	p.Ala17Lys	6.3
17	p.Ala17Thr	4.8
17	p.Ala17Arg	5.1
17	p.Ala17Ser	5.6
17	p.Ala17Ile	4.1
17	p.Ala17Met	3.3
17	p.Ala17His	3.7
17	p.Ala17Gln	5.4
17	p.Ala17Pro	6.2
17	p.Ala17Leu	3.1
17	p.Ala17Asp	4.7
17	p.Ala17Glu	4.3
17	p.Ala17Ala	9.9
17	p.Ala17Gly	7.6
17	p.Ala17Val	5.1
17	p.Ala17Tyr	3.9
17	p.Ala17Cys	2.9
17	p.Ala17Trp	4.7
17	p.Ala17Phe	4.9
18	p.Thr18Asn	7
18	p.Thr18Lys	5.3
18	p.Thr18Thr	5.9
18	p.Thr18Arg	4.2
18	p.Thr18Ser	4.7
18	p.Thr18Ile	4.8
18	p.Thr18Met	7.2
18	p.Thr18His	2.7
18	p.Thr18Gln	5.7
18	p.Thr18Pro	5
18	p.Thr18Leu	6.2
18	p.Thr18Asp	3.8
18	p.Thr18Glu	5.5
18	p.Thr18Ala	6.8
18	p.Thr18Gly	3.1
18	p.Thr18Val	5.9
18	p.Thr18Tyr	3.4
18	p.Thr18Cys	4.2
18	p.Thr18Trp	5.8
18	p.Thr18Phe	2.7
19	p.Ala19Asn	4.3
19	p.Ala19Lys	4.8
19	p.Ala19Thr	5.3
19	p.Ala19Arg	3.6
19	p.Ala19Ser	4.3
19	p.Ala19Ile	5.1
19	p.Ala19Met	3.5
19	p.Ala19His	6.3
19	p.Ala19Gln	4.7
19	p.Ala19Pro	5.2
19	p.Ala19Leu	5.2
19	p.Ala19Asp	4.2
19	p.Ala19Glu	6.9
19	p.Ala19Ala	11.5
19	p.Ala19Gly	4.4
19	p.Ala19Val	3.7
19	p.Ala19Tyr	4.3
19	p.Ala19Cys	3.4
19	p.Ala19Trp	5
19	p.Ala19Phe	4.5
20	p.Ala20Asn	4.7
20	p.Ala20Lys	6.6
20	p.Ala20Thr	6.5
20	p.Ala20Arg	3.8
20	p.Ala20Ser	3.3
20	p.Ala20Ile	4.2
20	p.Ala20Met	5.4
20	p.Ala20His	3.1
20	p.Ala20Gln	4.3
20	p.Ala20Pro	5.4
20	p.Ala20Leu	4.5
20	p.Ala20Asp	7
20	p.Ala20Glu	6.7
20	p.Ala20Ala	6.8
20	p.Ala20Gly	4
20	p.Ala20Val	5.7
20	p.Ala20Tyr	3.8
20	p.Ala20Cys	5.5
20	p.Ala20Trp	4.5
20	p.Ala20Phe	4.3
21	p.Ala21Asn	2.3
21	p.Ala21Lys	4
21	p.Ala21Thr	3.1
21	p.Ala21Arg	2.7
21	p.Ala21Ser	2.4
21	p.Ala21Ile	1.8
21	p.Ala21Met	4.6
21	p.Ala21His	4.7
21	p.Ala21Gln	5.8
21	p.Ala21Pro	4.1
21	p.Ala21Leu	4.9
21	p.Ala21Asp	4.7
21	p.Ala21Glu	15.6
21	p.Ala21Ala	7.6
21	p.Ala21Gly	5.8
21	p.Ala21Val	10.4
21	p.Ala21Tyr	4.1
21	p.Ala21Cys	4.8
21	p.Ala21Trp	3.7
21	p.Ala21Phe	2.9
22	p.Arg22Asn	5.1
22	p.Arg22Lys	5
22	p.Arg22Thr	4.7
22	p.Arg22Arg	39.7
22	p.Arg22Ser	2.8
22	p.Arg22Ile	4.2
22	p.Arg22Met	4.9
22	p.Arg22His	1.5
22	p.Arg22Gln	5.1
22	p.Arg22Pro	1.8
22	p.Arg22Leu	3.4
22	p.Arg22Asp	1.4
22	p.Arg22Glu	3.6
22	p.Arg22Ala	1.5
22	p.Arg22Gly	1.5
22	p.Arg22Val	1.7
22	p.Arg22Tyr	3.8
22	p.Arg22Cys	1.9
22	p.Arg22Trp	4.1
22	p.Arg22Phe	2.4
23	p.Gly23Asn	5.1
23	p.Gly23Lys	4.7
23	p.Gly23Thr	5.4
23	p.Gly23Arg	8.4
23	p.Gly23Ser	4
23	p.Gly23Ile	4.4
23	p.Gly23Met	5.6
23	p.Gly23His	5.1
23	p.Gly23Gln	4.8
23	p.Gly23Pro	4.7
23	p.Gly23Leu	1.6
23	p.Gly23Asp	4.6
23	p.Gly23Glu	5.3
23	p.Gly23Ala	5.3
23	p.Gly23Gly	5.1
23	p.Gly23Val	6.2
23	p.Gly23Tyr	4.8
23	p.Gly23Cys	5.1
23	p.Gly23Trp	4.7
23	p.Gly23Phe	5.1
24	p.Arg24Asn	4.1
24	p.Arg24Lys	4.9
24	p.Arg24Thr	3.9
24	p.Arg24Arg	12.1
24	p.Arg24Ser	5.1
24	p.Arg24Ile	3.6
24	p.Arg24Met	4.6
24	p.Arg24His	4.5
24	p.Arg24Gln	5.4
24	p.Arg24Pro	3.5
24	p.Arg24Leu	4.2
24	p.Arg24Asp	6.6
24	p.Arg24Glu	4.2
24	p.Arg24Ala	4.7
24	p.Arg24Gly	3.3
24	p.Arg24Val	5.7
24	p.Arg24Tyr	4.3
24	p.Arg24Cys	4.2
24	p.Arg24Trp	6.2
24	p.Arg24Phe	4.9
25	p.Val25Asn	3.9
25	p.Val25Lys	5.6
25	p.Val25Thr	4.2
25	p.Val25Arg	7.4
25	p.Val25Ser	4.2
25	p.Val25Ile	3.9
25	p.Val25Met	10.1
25	p.Val25His	2.6
25	p.Val25Gln	2.2
25	p.Val25Pro	1.5
25	p.Val25Leu	5.1
25	p.Val25Asp	5.9
25	p.Val25Glu	9.8
25	p.Val25Ala	3.3
25	p.Val25Gly	5.3
25	p.Val25Val	6.4
25	p.Val25Tyr	4.6
25	p.Val25Cys	4.3
25	p.Val25Trp	5.8
25	p.Val25Phe	3.6
26	p.Glu26Asn	2.1
26	p.Glu26Lys	3.4
26	p.Glu26Thr	1.7
26	p.Glu26Arg	9.3
26	p.Glu26Ser	2
26	p.Glu26Ile	5.3
26	p.Glu26Met	5.8
26	p.Glu26His	3.1
26	p.Glu26Gln	3.6
26	p.Glu26Pro	1
26	p.Glu26Leu	4
26	p.Glu26Asp	15.7
26	p.Glu26Glu	15.1
26	p.Glu26Ala	5.5
26	p.Glu26Gly	2.4
26	p.Glu26Val	6.2
26	p.Glu26Tyr	3.4
26	p.Glu26Cys	0.8
26	p.Glu26Trp	5.7
26	p.Glu26Phe	3.8
27	p.Glu27Asn	1.2
27	p.Glu27Lys	14.1
27	p.Glu27Thr	0.2
27	p.Glu27Arg	5.1
27	p.Glu27Ser	3.1
27	p.Glu27Ile	0.6
27	p.Glu27Met	7.4
27	p.Glu27His	0
27	p.Glu27Gln	6.4
27	p.Glu27Pro	0.8
27	p.Glu27Leu	4.4
27	p.Glu27Asp	6.8
27	p.Glu27Glu	14.1
27	p.Glu27Ala	0.7
27	p.Glu27Gly	2.3
27	p.Glu27Val	10.5
27	p.Glu27Tyr	2.5
27	p.Glu27Cys	2.4
27	p.Glu27Trp	9.2
27	p.Glu27Phe	8.1
28	p.Val28Asn	4.1
28	p.Val28Lys	4.4
28	p.Val28Thr	3.7
28	p.Val28Arg	4.3
28	p.Val28Ser	4.7
28	p.Val28Ile	7
28	p.Val28Met	3.8
28	p.Val28His	2.9
28	p.Val28Gln	4.2
28	p.Val28Pro	3.8
28	p.Val28Leu	5
28	p.Val28Asp	6.5
28	p.Val28Glu	5.7
28	p.Val28Ala	7.5
28	p.Val28Gly	8.9
28	p.Val28Val	7.1
28	p.Val28Tyr	3.8
28	p.Val28Cys	3.8
28	p.Val28Trp	4.3
28	p.Val28Phe	4.6
29	p.Arg29Asn	4.4
29	p.Arg29Lys	5.7
29	p.Arg29Thr	3.9
29	p.Arg29Arg	16.6
29	p.Arg29Ser	9.7
29	p.Arg29Ile	4
29	p.Arg29Met	4.8
29	p.Arg29His	2
29	p.Arg29Gln	5.7
29	p.Arg29Pro	1.4
29	p.Arg29Leu	5.3
29	p.Arg29Asp	4.7
29	p.Arg29Glu	3.5
29	p.Arg29Ala	4.7
29	p.Arg29Gly	5.7
29	p.Arg29Val	3.2
29	p.Arg29Tyr	4.1
29	p.Arg29Cys	5.7
29	p.Arg29Trp	3
29	p.Arg29Phe	1.8
30	p.Ala30Asn	5
30	p.Ala30Lys	4.1
30	p.Ala30Thr	5
30	p.Ala30Arg	5.6
30	p.Ala30Ser	3.6
30	p.Ala30Ile	3.6
30	p.Ala30Met	6.4
30	p.Ala30His	3.6
30	p.Ala30Gln	4.4
30	p.Ala30Pro	3.6
30	p.Ala30Leu	3.3
30	p.Ala30Asp	3.8
30	p.Ala30Glu	12.6
30	p.Ala30Ala	4.4
30	p.Ala30Gly	3.6
30	p.Ala30Val	11.6
30	p.Ala30Tyr	3.6
30	p.Ala30Cys	2.7
30	p.Ala30Trp	6.8
30	p.Ala30Phe	2.8
31	p.Leu31Asn	2.5
31	p.Leu31Lys	3.5
31	p.Leu31Thr	3.1
31	p.Leu31Arg	3.3
31	p.Leu31Ser	3.3
31	p.Leu31Ile	10.3
31	p.Leu31Met	4.7
31	p.Leu31His	6.8
31	p.Leu31Gln	4.4
31	p.Leu31Pro	15.8
31	p.Leu31Leu	11.4
31	p.Leu31Asp	3.8
31	p.Leu31Glu	1.7
31	p.Leu31Ala	3
31	p.Leu31Gly	4
31	p.Leu31Val	2.6
31	p.Leu31Tyr	4.3
31	p.Leu31Cys	2.5
31	p.Leu31Trp	2
31	p.Leu31Phe	6.9
32	p.Leu32Asn	4.6
32	p.Leu32Lys	4.9
32	p.Leu32Thr	4.2
32	p.Leu32Arg	4.6
32	p.Leu32Ser	4.9
32	p.Leu32Ile	5.8
32	p.Leu32Met	6.4
32	p.Leu32His	4.4
32	p.Leu32Gln	5.7
32	p.Leu32Pro	6.5
32	p.Leu32Leu	5.5
32	p.Leu32Asp	2.7
32	p.Leu32Glu	4.3
32	p.Leu32Ala	4.9
32	p.Leu32Gly	3.9
32	p.Leu32Val	6.4
32	p.Leu32Tyr	5.6
32	p.Leu32Cys	4.3
32	p.Leu32Trp	4.5
32	p.Leu32Phe	5.9
33	p.Glu33Asn	7.1
33	p.Glu33Lys	4
33	p.Glu33Thr	4.6
33	p.Glu33Arg	3.8
33	p.Glu33Ser	1.8
33	p.Glu33Ile	5.6
33	p.Glu33Met	4.2
33	p.Glu33His	5
33	p.Glu33Gln	5
33	p.Glu33Pro	2.8
33	p.Glu33Leu	5.2
33	p.Glu33Asp	8.8
33	p.Glu33Glu	9
33	p.Glu33Ala	3.4
33	p.Glu33Gly	4.4
33	p.Glu33Val	5.6
33	p.Glu33Tyr	4.8
33	p.Glu33Cys	4.7
33	p.Glu33Trp	5.5
33	p.Glu33Phe	4.6
34	p.Ala34Asn	3.6
34	p.Ala34Lys	6.4
34	p.Ala34Thr	5.3
34	p.Ala34Arg	6.3
34	p.Ala34Ser	3.4
34	p.Ala34Ile	2.5
34	p.Ala34Met	4.8
34	p.Ala34His	3.4
34	p.Ala34Gln	4.4
34	p.Ala34Pro	4.6
34	p.Ala34Leu	4.8
34	p.Ala34Asp	10.6
34	p.Ala34Glu	5.6
34	p.Ala34Ala	7.2
34	p.Ala34Gly	5.1
34	p.Ala34Val	4.1
34	p.Ala34Tyr	4.9
34	p.Ala34Cys	4.5
34	p.Ala34Trp	4
34	p.Ala34Phe	4.4
35	p.Gly35Asn	3.3
35	p.Gly35Lys	4.3
35	p.Gly35Thr	4.2
35	p.Gly35Arg	4.9
35	p.Gly35Ser	3.4
35	p.Gly35Ile	3.1
35	p.Gly35Met	5.2
35	p.Gly35His	5.1
35	p.Gly35Gln	5.4
35	p.Gly35Pro	4.4
35	p.Gly35Leu	5.2
35	p.Gly35Asp	4.6
35	p.Gly35Glu	5.2
35	p.Gly35Ala	3.5
35	p.Gly35Gly	10.4
35	p.Gly35Val	6.6
35	p.Gly35Tyr	4.7
35	p.Gly35Cys	4.8
35	p.Gly35Trp	6.3
35	p.Gly35Phe	5.4
36	p.Ala36Asn	4.9
36	p.Ala36Lys	5.4
36	p.Ala36Thr	3.4
36	p.Ala36Arg	4
36	p.Ala36Ser	3.4
36	p.Ala36Ile	5.3
36	p.Ala36Met	4.8
36	p.Ala36His	4.5
36	p.Ala36Gln	5.8
36	p.Ala36Pro	5.5
36	p.Ala36Leu	5.5
36	p.Ala36Asp	4.6
36	p.Ala36Glu	6.4
36	p.Ala36Ala	8
36	p.Ala36Gly	2.6
36	p.Ala36Val	5.9
36	p.Ala36Tyr	4.4
36	p.Ala36Cys	4.2
36	p.Ala36Trp	6.4
36	p.Ala36Phe	5.1
37	p.Leu37Asn	5.4
37	p.Leu37Lys	4.9
37	p.Leu37Thr	3.1
37	p.Leu37Arg	3.3
37	p.Leu37Ser	3.7
37	p.Leu37Ile	5
37	p.Leu37Met	5.9
37	p.Leu37His	4.8
37	p.Leu37Gln	7.4
37	p.Leu37Pro	3.6
37	p.Leu37Leu	7.3
37	p.Leu37Asp	3.4
37	p.Leu37Glu	4.6
37	p.Leu37Ala	4.7
37	p.Leu37Gly	3
37	p.Leu37Val	9.3
37	p.Leu37Tyr	3.8
37	p.Leu37Cys	3.2
37	p.Leu37Trp	6.3
37	p.Leu37Phe	7.1
38	p.Pro38Asn	4.2
38	p.Pro38Lys	3.5
38	p.Pro38Thr	3.4
38	p.Pro38Arg	3.9
38	p.Pro38Ser	3.2
38	p.Pro38Ile	3.1
38	p.Pro38Met	5.2
38	p.Pro38His	3.3
38	p.Pro38Gln	10.8
38	p.Pro38Pro	9.5
38	p.Pro38Leu	6.3
38	p.Pro38Asp	4.3
38	p.Pro38Glu	6.9
38	p.Pro38Ala	3.4
38	p.Pro38Gly	4.6
38	p.Pro38Val	6
38	p.Pro38Tyr	2.7
38	p.Pro38Cys	5
38	p.Pro38Trp	4.4
38	p.Pro38Phe	6.5
39	p.Asn39Asn	7.6
39	p.Asn39Lys	8.2
39	p.Asn39Thr	3
39	p.Asn39Arg	4
39	p.Asn39Ser	5
39	p.Asn39Ile	4.1
39	p.Asn39Met	6.3
39	p.Asn39His	4.2
39	p.Asn39Gln	2.9
39	p.Asn39Pro	3.8
39	p.Asn39Leu	6.5
39	p.Asn39Asp	6.4
39	p.Asn39Glu	6
39	p.Asn39Ala	3.9
39	p.Asn39Gly	6.1
39	p.Asn39Val	5.2
39	p.Asn39Tyr	3.1
39	p.Asn39Cys	5.2
39	p.Asn39Trp	3.8
39	p.Asn39Phe	4.6
40	p.Ala40Asn	5
40	p.Ala40Lys	6.2
40	p.Ala40Thr	4.3
40	p.Ala40Arg	4.5
40	p.Ala40Ser	2.5
40	p.Ala40Ile	3.1
40	p.Ala40Met	3.4
40	p.Ala40His	2.9
40	p.Ala40Gln	4
40	p.Ala40Pro	3.9
40	p.Ala40Leu	4
40	p.Ala40Asp	5.1
40	p.Ala40Glu	14.6
40	p.Ala40Ala	5.8
40	p.Ala40Gly	4.5
40	p.Ala40Val	11
40	p.Ala40Tyr	4.1
40	p.Ala40Cys	3.3
40	p.Ala40Trp	3.8
40	p.Ala40Phe	4.1
41	p.Pro41Asn	4.9
41	p.Pro41Lys	4.3
41	p.Pro41Thr	4
41	p.Pro41Arg	3.4
41	p.Pro41Ser	6
41	p.Pro41Ile	3.9
41	p.Pro41Met	6.1
41	p.Pro41His	3.9
41	p.Pro41Gln	5.7
41	p.Pro41Pro	4.9
41	p.Pro41Leu	5.1
41	p.Pro41Asp	6.5
41	p.Pro41Glu	5.2
41	p.Pro41Ala	6
41	p.Pro41Gly	2.9
41	p.Pro41Val	6.6
41	p.Pro41Tyr	5.5
41	p.Pro41Cys	5.2
41	p.Pro41Trp	4
41	p.Pro41Phe	5.9
42	p.Asn42Asn	4.8
42	p.Asn42Lys	6.4
42	p.Asn42Thr	7.5
42	p.Asn42Arg	5.4
42	p.Asn42Ser	5.8
42	p.Asn42Ile	5.8
42	p.Asn42Met	3.6
42	p.Asn42His	7.8
42	p.Asn42Gln	4.4
42	p.Asn42Pro	3
42	p.Asn42Leu	3.6
42	p.Asn42Asp	5.5
42	p.Asn42Glu	4.6
42	p.Asn42Ala	3
42	p.Asn42Gly	4.4
42	p.Asn42Val	5.5
42	p.Asn42Tyr	5.4
42	p.Asn42Cys	4.3
42	p.Asn42Trp	4.2
42	p.Asn42Phe	5.1
43	p.Ser43Asn	2.8
43	p.Ser43Lys	4.6
43	p.Ser43Thr	7.4
43	p.Ser43Arg	3.8
43	p.Ser43Ser	3.4
43	p.Ser43Ile	2.3
43	p.Ser43Met	4
43	p.Ser43His	4.3
43	p.Ser43Gln	4
43	p.Ser43Pro	7.7
43	p.Ser43Leu	2.7
43	p.Ser43Asp	4
43	p.Ser43Glu	3.5
43	p.Ser43Ala	13.7
43	p.Ser43Gly	2
43	p.Ser43Val	4.3
43	p.Ser43Tyr	10.9
43	p.Ser43Cys	4.4
43	p.Ser43Trp	3.7
43	p.Ser43Phe	6.5
44	p.Tyr44Asn	6.1
44	p.Tyr44Lys	5.3
44	p.Tyr44Thr	5.3
44	p.Tyr44Arg	3.6
44	p.Tyr44Ser	4.6
44	p.Tyr44Ile	4.8
44	p.Tyr44Met	4
44	p.Tyr44His	6.7
44	p.Tyr44Gln	2.9
44	p.Tyr44Pro	3.5
44	p.Tyr44Leu	4
44	p.Tyr44Asp	3
44	p.Tyr44Glu	6.1
44	p.Tyr44Ala	4.4
44	p.Tyr44Gly	4.7
44	p.Tyr44Val	6.4
44	p.Tyr44Tyr	10.5
44	p.Tyr44Cys	3.9
44	p.Tyr44Trp	6.1
44	p.Tyr44Phe	4
45	p.Gly45Asn	4.3
45	p.Gly45Lys	4.7
45	p.Gly45Thr	3
45	p.Gly45Arg	8.9
45	p.Gly45Ser	6.3
45	p.Gly45Ile	5.1
45	p.Gly45Met	4.3
45	p.Gly45His	4.1
45	p.Gly45Gln	4.6
45	p.Gly45Pro	3.2
45	p.Gly45Leu	5.5
45	p.Gly45Asp	5.4
45	p.Gly45Glu	4.7
45	p.Gly45Ala	3.6
45	p.Gly45Gly	9.8
45	p.Gly45Val	4.3
45	p.Gly45Tyr	4
45	p.Gly45Cys	5
45	p.Gly45Trp	3.8
45	p.Gly45Phe	5.4
46	p.Arg46Asn	4.9
46	p.Arg46Lys	3.4
46	p.Arg46Thr	5
46	p.Arg46Arg	4.4
46	p.Arg46Ser	9.2
46	p.Arg46Ile	6
46	p.Arg46Met	2.7
46	p.Arg46His	9.1
46	p.Arg46Gln	3.9
46	p.Arg46Pro	7.5
46	p.Arg46Leu	5.7
46	p.Arg46Asp	3.3
46	p.Arg46Glu	2.9
46	p.Arg46Ala	3.2
46	p.Arg46Gly	5.1
46	p.Arg46Val	2.7
46	p.Arg46Tyr	5.7
46	p.Arg46Cys	7.3
46	p.Arg46Trp	4
46	p.Arg46Phe	4
47	p.Arg47Asn	3.6
47	p.Arg47Lys	3.5
47	p.Arg47Thr	4
47	p.Arg47Arg	4.8
47	p.Arg47Ser	10.4
47	p.Arg47Ile	3.3
47	p.Arg47Met	4
47	p.Arg47His	9.5
47	p.Arg47Gln	4.5
47	p.Arg47Pro	4.8
47	p.Arg47Leu	3.8
47	p.Arg47Asp	4.3
47	p.Arg47Glu	4.9
47	p.Arg47Ala	3.3
47	p.Arg47Gly	5
47	p.Arg47Val	3.8
47	p.Arg47Tyr	5
47	p.Arg47Cys	8.1
47	p.Arg47Trp	4.5
47	p.Arg47Phe	4.7
48	p.Pro48Asn	4.7
48	p.Pro48Lys	5.5
48	p.Pro48Thr	5.1
48	p.Pro48Arg	5.6
48	p.Pro48Ser	4.6
48	p.Pro48Ile	6.7
48	p.Pro48Met	6.6
48	p.Pro48His	4.4
48	p.Pro48Gln	5.3
48	p.Pro48Pro	5.2
48	p.Pro48Leu	7.1
48	p.Pro48Asp	4.6
48	p.Pro48Glu	4.7
48	p.Pro48Ala	3.5
48	p.Pro48Gly	4.7
48	p.Pro48Val	4.8
48	p.Pro48Tyr	3.8
48	p.Pro48Cys	3.4
48	p.Pro48Trp	5.6
48	p.Pro48Phe	4.3
49	p.Ile49Asn	3.5
49	p.Ile49Lys	5.2
49	p.Ile49Thr	3.9
49	p.Ile49Arg	8.3
49	p.Ile49Ser	4.8
49	p.Ile49Ile	7.3
49	p.Ile49Met	7.5
49	p.Ile49His	4.7
49	p.Ile49Gln	4.8
49	p.Ile49Pro	4.5
49	p.Ile49Leu	4.6
49	p.Ile49Asp	5.5
49	p.Ile49Glu	5.4
49	p.Ile49Ala	3.7
49	p.Ile49Gly	5.2
49	p.Ile49Val	5.5
49	p.Ile49Tyr	3.6
49	p.Ile49Cys	3
49	p.Ile49Trp	4.9
49	p.Ile49Phe	4.2
50	p.Gln50Asn	3.8
50	p.Gln50Lys	4.2
50	p.Gln50Thr	4.3
50	p.Gln50Arg	3.9
50	p.Gln50Ser	3.9
50	p.Gln50Ile	4.2
50	p.Gln50Met	5.4
50	p.Gln50His	9.2
50	p.Gln50Gln	7.5
50	p.Gln50Pro	5.7
50	p.Gln50Leu	5.1
50	p.Gln50Asp	4.7
50	p.Gln50Glu	6
50	p.Gln50Ala	4.4
50	p.Gln50Gly	4.1
50	p.Gln50Val	6.3
50	p.Gln50Tyr	4.6
50	p.Gln50Cys	3.7
50	p.Gln50Trp	3.8
50	p.Gln50Phe	5.1
51	p.Val51Asn	2.1
51	p.Val51Lys	3.6
51	p.Val51Thr	2.7
51	p.Val51Arg	3.2
51	p.Val51Ser	3.1
51	p.Val51Ile	7.2
51	p.Val51Met	4.8
51	p.Val51His	4.1
51	p.Val51Gln	6.2
51	p.Val51Pro	5.7
51	p.Val51Leu	6.3
51	p.Val51Asp	6.2
51	p.Val51Glu	4.9
51	p.Val51Ala	3.7
51	p.Val51Gly	2.5
51	p.Val51Val	14.3
51	p.Val51Tyr	4.5
51	p.Val51Cys	7.5
51	p.Val51Trp	4
51	p.Val51Phe	3.5
52	p.Met52Asn	4.3
52	p.Met52Lys	7.2
52	p.Met52Thr	4.5
52	p.Met52Arg	4.2
52	p.Met52Ser	5.5
52	p.Met52Ile	5.5
52	p.Met52Met	0
52	p.Met52His	4.5
52	p.Met52Gln	4.3
52	p.Met52Pro	3.9
52	p.Met52Leu	9.7
52	p.Met52Asp	3.7
52	p.Met52Glu	4.8
52	p.Met52Ala	5.7
52	p.Met52Gly	7.2
52	p.Met52Val	7
52	p.Met52Tyr	4.7
52	p.Met52Cys	5.1
52	p.Met52Trp	3.9
52	p.Met52Phe	4.3
53	p.Met53Asn	4.9
53	p.Met53Lys	6.9
53	p.Met53Thr	5.1
53	p.Met53Arg	4.7
53	p.Met53Ser	4.1
53	p.Met53Ile	4.7
53	p.Met53Met	0
53	p.Met53His	5.9
53	p.Met53Gln	6.5
53	p.Met53Pro	4.4
53	p.Met53Leu	8.6
53	p.Met53Asp	3.9
53	p.Met53Glu	5.7
53	p.Met53Ala	5.5
53	p.Met53Gly	4.2
53	p.Met53Val	6.3
53	p.Met53Tyr	4.5
53	p.Met53Cys	3.4
53	p.Met53Trp	6.6
53	p.Met53Phe	4.2
54	p.Met54Asn	5.1
54	p.Met54Lys	4.7
54	p.Met54Thr	5.1
54	p.Met54Arg	3.5
54	p.Met54Ser	5.8
54	p.Met54Ile	7.4
54	p.Met54Met	0
54	p.Met54His	1.4
54	p.Met54Gln	4.4
54	p.Met54Pro	3.4
54	p.Met54Leu	14.3
54	p.Met54Asp	5.1
54	p.Met54Glu	4.9
54	p.Met54Ala	3
54	p.Met54Gly	3.2
54	p.Met54Val	9.6
54	p.Met54Tyr	2.3
54	p.Met54Cys	4.4
54	p.Met54Trp	4.7
54	p.Met54Phe	7.8
55	p.Gly55Asn	3.3
55	p.Gly55Lys	4.4
55	p.Gly55Thr	5.4
55	p.Gly55Arg	11.8
55	p.Gly55Ser	4.6
55	p.Gly55Ile	5.1
55	p.Gly55Met	4.9
55	p.Gly55His	4
55	p.Gly55Gln	3.5
55	p.Gly55Pro	6.1
55	p.Gly55Leu	5.8
55	p.Gly55Asp	4.6
55	p.Gly55Glu	5.8
55	p.Gly55Ala	2.8
55	p.Gly55Gly	8.6
55	p.Gly55Val	3.4
55	p.Gly55Tyr	4.9
55	p.Gly55Cys	4.5
55	p.Gly55Trp	3.4
55	p.Gly55Phe	3.1
56	p.Ser56Asn	4.9
56	p.Ser56Lys	7.2
56	p.Ser56Thr	3.6
56	p.Ser56Arg	3.9
56	p.Ser56Ser	5
56	p.Ser56Ile	4.7
56	p.Ser56Met	3
56	p.Ser56His	5.3
56	p.Ser56Gln	4.8
56	p.Ser56Pro	4.8
56	p.Ser56Leu	6.1
56	p.Ser56Asp	4.7
56	p.Ser56Glu	6.1
56	p.Ser56Ala	5.3
56	p.Ser56Gly	5.9
56	p.Ser56Val	5.7
56	p.Ser56Tyr	2.6
56	p.Ser56Cys	4.5
56	p.Ser56Trp	6.5
56	p.Ser56Phe	5.6
57	p.Ala57Asn	5.6
57	p.Ala57Lys	6.2
57	p.Ala57Thr	3.2
57	p.Ala57Arg	4
57	p.Ala57Ser	5.2
57	p.Ala57Ile	4.5
57	p.Ala57Met	3.9
57	p.Ala57His	5.4
57	p.Ala57Gln	4.2
57	p.Ala57Pro	5.1
57	p.Ala57Leu	5
57	p.Ala57Asp	5.5
57	p.Ala57Glu	5.7
57	p.Ala57Ala	6.1
57	p.Ala57Gly	5.4
57	p.Ala57Val	6.7
57	p.Ala57Tyr	4.3
57	p.Ala57Cys	5.4
57	p.Ala57Trp	4
57	p.Ala57Phe	4.5
58	p.Arg58Asn	5.1
58	p.Arg58Lys	7.3
58	p.Arg58Thr	2.3
58	p.Arg58Arg	5.6
58	p.Arg58Ser	5.4
58	p.Arg58Ile	5.3
58	p.Arg58Met	11.8
58	p.Arg58His	3.7
58	p.Arg58Gln	3.5
58	p.Arg58Pro	3.5
58	p.Arg58Leu	5.1
58	p.Arg58Asp	3.8
58	p.Arg58Glu	5.2
58	p.Arg58Ala	3.4
58	p.Arg58Gly	4.1
58	p.Arg58Val	5.7
58	p.Arg58Tyr	4.6
58	p.Arg58Cys	4.8
58	p.Arg58Trp	5.3
58	p.Arg58Phe	4.5
59	p.Val59Asn	4.8
59	p.Val59Lys	6.2
59	p.Val59Thr	5.1
59	p.Val59Arg	5
59	p.Val59Ser	5
59	p.Val59Ile	4.7
59	p.Val59Met	5.2
59	p.Val59His	4.4
59	p.Val59Gln	5.4
59	p.Val59Pro	4.3
59	p.Val59Leu	5.1
59	p.Val59Asp	5.3
59	p.Val59Glu	6.5
59	p.Val59Ala	3.5
59	p.Val59Gly	3.6
59	p.Val59Val	7.8
59	p.Val59Tyr	4.1
59	p.Val59Cys	4.5
59	p.Val59Trp	5.8
59	p.Val59Phe	3.9
60	p.Ala60Asn	3.6
60	p.Ala60Lys	5.3
60	p.Ala60Thr	5.4
60	p.Ala60Arg	4.5
60	p.Ala60Ser	3.6
60	p.Ala60Ile	5
60	p.Ala60Met	6
60	p.Ala60His	4.7
60	p.Ala60Gln	6.1
60	p.Ala60Pro	4.6
60	p.Ala60Leu	3.7
60	p.Ala60Asp	4.7
60	p.Ala60Glu	5.5
60	p.Ala60Ala	10.6
60	p.Ala60Gly	4.2
60	p.Ala60Val	4.5
60	p.Ala60Tyr	3.5
60	p.Ala60Cys	4.3
60	p.Ala60Trp	4.9
60	p.Ala60Phe	5.2
61	p.Glu61Asn	4.5
61	p.Glu61Lys	4.6
61	p.Glu61Thr	4.5
61	p.Glu61Arg	4.2
61	p.Glu61Ser	4.4
61	p.Glu61Ile	5.1
61	p.Glu61Met	5.7
61	p.Glu61His	4.1
61	p.Glu61Gln	5.1
61	p.Glu61Pro	3.7
61	p.Glu61Leu	5.8
61	p.Glu61Asp	8.7
61	p.Glu61Glu	8.1
61	p.Glu61Ala	4.2
61	p.Glu61Gly	4.2
61	p.Glu61Val	4.6
61	p.Glu61Tyr	4.8
61	p.Glu61Cys	4.7
61	p.Glu61Trp	5
61	p.Glu61Phe	3.7
62	p.Leu62Asn	3.6
62	p.Leu62Lys	4.9
62	p.Leu62Thr	4.8
62	p.Leu62Arg	4.9
62	p.Leu62Ser	4.2
62	p.Leu62Ile	4.5
62	p.Leu62Met	3.9
62	p.Leu62His	4.7
62	p.Leu62Gln	4.2
62	p.Leu62Pro	4.8
62	p.Leu62Leu	8.1
62	p.Leu62Asp	3
62	p.Leu62Glu	4.6
62	p.Leu62Ala	4.1
62	p.Leu62Gly	6.2
62	p.Leu62Val	6.4
62	p.Leu62Tyr	4.9
62	p.Leu62Cys	5.5
62	p.Leu62Trp	4.7
62	p.Leu62Phe	7.8
63	p.Leu63Asn	4.2
63	p.Leu63Lys	3.8
63	p.Leu63Thr	3.6
63	p.Leu63Arg	3.8
63	p.Leu63Ser	4.1
63	p.Leu63Ile	12.4
63	p.Leu63Met	4.8
63	p.Leu63His	7.3
63	p.Leu63Gln	3
63	p.Leu63Pro	10.7
63	p.Leu63Leu	4.9
63	p.Leu63Asp	3.8
63	p.Leu63Glu	4.8
63	p.Leu63Ala	2.9
63	p.Leu63Gly	3.2
63	p.Leu63Val	4.6
63	p.Leu63Tyr	4.5
63	p.Leu63Cys	2.5
63	p.Leu63Trp	5.1
63	p.Leu63Phe	6
64	p.Leu64Asn	3.9
64	p.Leu64Lys	4
64	p.Leu64Thr	3.9
64	p.Leu64Arg	4.9
64	p.Leu64Ser	3.8
64	p.Leu64Ile	10.3
64	p.Leu64Met	3.2
64	p.Leu64His	9.1
64	p.Leu64Gln	4.4
64	p.Leu64Pro	5.1
64	p.Leu64Leu	5.7
64	p.Leu64Asp	3.4
64	p.Leu64Glu	4.4
64	p.Leu64Ala	4.8
64	p.Leu64Gly	4.8
64	p.Leu64Val	3.5
64	p.Leu64Tyr	3.9
64	p.Leu64Cys	4.4
64	p.Leu64Trp	5.3
64	p.Leu64Phe	7.2
65	p.Leu65Asn	3.1
65	p.Leu65Lys	5.2
65	p.Leu65Thr	4.4
65	p.Leu65Arg	5
65	p.Leu65Ser	5.3
65	p.Leu65Ile	4.5
65	p.Leu65Met	6.5
65	p.Leu65His	3.5
65	p.Leu65Gln	4.8
65	p.Leu65Pro	3.2
65	p.Leu65Leu	6.9
65	p.Leu65Asp	5.6
65	p.Leu65Glu	5.4
65	p.Leu65Ala	4
65	p.Leu65Gly	5.8
65	p.Leu65Val	7.4
65	p.Leu65Tyr	4.6
65	p.Leu65Cys	4.4
65	p.Leu65Trp	6
65	p.Leu65Phe	4.7
66	p.His66Asn	4.6
66	p.His66Lys	5.6
66	p.His66Thr	3.6
66	p.His66Arg	4.8
66	p.His66Ser	4.9
66	p.His66Ile	4.6
66	p.His66Met	4.7
66	p.His66His	5.8
66	p.His66Gln	5.7
66	p.His66Pro	4.8
66	p.His66Leu	5.9
66	p.His66Asp	2.8
66	p.His66Glu	6.9
66	p.His66Ala	5.3
66	p.His66Gly	5.6
66	p.His66Val	5.1
66	p.His66Tyr	4.4
66	p.His66Cys	4.6
66	p.His66Trp	6
66	p.His66Phe	4.2
67	p.Gly67Asn	4.2
67	p.Gly67Lys	5.2
67	p.Gly67Thr	4.3
67	p.Gly67Arg	7.7
67	p.Gly67Ser	3.9
67	p.Gly67Ile	4
67	p.Gly67Met	4.2
67	p.Gly67His	5.6
67	p.Gly67Gln	4.7
67	p.Gly67Pro	5.3
67	p.Gly67Leu	4.3
67	p.Gly67Asp	3.8
67	p.Gly67Glu	4.2
67	p.Gly67Ala	4.7
67	p.Gly67Gly	9.1
67	p.Gly67Val	4.4
67	p.Gly67Tyr	5.3
67	p.Gly67Cys	4.3
67	p.Gly67Trp	6.2
67	p.Gly67Phe	4.7
68	p.Ala68Asn	3.2
68	p.Ala68Lys	6
68	p.Ala68Thr	5.3
68	p.Ala68Arg	3.3
68	p.Ala68Ser	4.3
68	p.Ala68Ile	3.5
68	p.Ala68Met	6.6
68	p.Ala68His	4.1
68	p.Ala68Gln	3.7
68	p.Ala68Pro	5.3
68	p.Ala68Leu	5.5
68	p.Ala68Asp	5.6
68	p.Ala68Glu	6.1
68	p.Ala68Ala	7.4
68	p.Ala68Gly	4.8
68	p.Ala68Val	6.6
68	p.Ala68Tyr	4.1
68	p.Ala68Cys	5.1
68	p.Ala68Trp	4.9
68	p.Ala68Phe	4.9
69	p.Glu69Asn	4.7
69	p.Glu69Lys	5.7
69	p.Glu69Thr	4.2
69	p.Glu69Arg	5.2
69	p.Glu69Ser	5.9
69	p.Glu69Ile	5.5
69	p.Glu69Met	4.7
69	p.Glu69His	5.2
69	p.Glu69Gln	5.4
69	p.Glu69Pro	5.1
69	p.Glu69Leu	4.7
69	p.Glu69Asp	4.9
69	p.Glu69Glu	7.5
69	p.Glu69Ala	0.5
69	p.Glu69Gly	4.8
69	p.Glu69Val	4.8
69	p.Glu69Tyr	4.9
69	p.Glu69Cys	6.4
69	p.Glu69Trp	6.1
69	p.Glu69Phe	3.9
70	p.Pro70Asn	5.9
70	p.Pro70Lys	3.4
70	p.Pro70Thr	6.1
70	p.Pro70Arg	5.7
70	p.Pro70Ser	5.7
70	p.Pro70Ile	6.7
70	p.Pro70Met	5.9
70	p.Pro70His	2.3
70	p.Pro70Gln	2.4
70	p.Pro70Pro	8.4
70	p.Pro70Leu	7.4
70	p.Pro70Asp	4.8
70	p.Pro70Glu	5.2
70	p.Pro70Ala	5.3
70	p.Pro70Gly	4.5
70	p.Pro70Val	5
70	p.Pro70Tyr	3.5
70	p.Pro70Cys	3
70	p.Pro70Trp	4.2
70	p.Pro70Phe	4.7
71	p.Asn71Asn	6.8
71	p.Asn71Lys	12.4
71	p.Asn71Thr	4.1
71	p.Asn71Arg	4.5
71	p.Asn71Ser	3.9
71	p.Asn71Ile	3.5
71	p.Asn71Met	2.6
71	p.Asn71His	4.7
71	p.Asn71Gln	4.3
71	p.Asn71Pro	5.1
71	p.Asn71Leu	4.1
71	p.Asn71Asp	4.9
71	p.Asn71Glu	6.6
71	p.Asn71Ala	5.7
71	p.Asn71Gly	3.6
71	p.Asn71Val	3.8
71	p.Asn71Tyr	5.6
71	p.Asn71Cys	4
71	p.Asn71Trp	4
71	p.Asn71Phe	5.6
72	p.Cys72Asn	4.4
72	p.Cys72Lys	4.4
72	p.Cys72Thr	4.9
72	p.Cys72Arg	4
72	p.Cys72Ser	4.4
72	p.Cys72Ile	3.6
72	p.Cys72Met	3.6
72	p.Cys72His	3
72	p.Cys72Gln	3.9
72	p.Cys72Pro	4.9
72	p.Cys72Leu	2.8
72	p.Cys72Asp	5.6
72	p.Cys72Glu	5.5
72	p.Cys72Ala	3.3
72	p.Cys72Gly	3.1
72	p.Cys72Val	4.4
72	p.Cys72Tyr	5.6
72	p.Cys72Cys	9.9
72	p.Cys72Trp	13.7
72	p.Cys72Phe	4.8
73	p.Ala73Asn	4.4
73	p.Ala73Lys	3.5
73	p.Ala73Thr	8.3
73	p.Ala73Arg	4.4
73	p.Ala73Ser	5.5
73	p.Ala73Ile	4.3
73	p.Ala73Met	4.4
73	p.Ala73His	5.4
73	p.Ala73Gln	3.3
73	p.Ala73Pro	5.1
73	p.Ala73Leu	5.4
73	p.Ala73Asp	3
73	p.Ala73Glu	5.6
73	p.Ala73Ala	9.6
73	p.Ala73Gly	4
73	p.Ala73Val	5.2
73	p.Ala73Tyr	5.1
73	p.Ala73Cys	4.7
73	p.Ala73Trp	5
73	p.Ala73Phe	3.9
74	p.Asp74Asn	5.2
74	p.Asp74Lys	5.8
74	p.Asp74Thr	4.7
74	p.Asp74Arg	4.5
74	p.Asp74Ser	4.5
74	p.Asp74Ile	4.6
74	p.Asp74Met	5.1
74	p.Asp74His	4
74	p.Asp74Gln	3.5
74	p.Asp74Pro	3.2
74	p.Asp74Leu	5.7
74	p.Asp74Asp	8.6
74	p.Asp74Glu	9.2
74	p.Asp74Ala	3.5
74	p.Asp74Gly	4.2
74	p.Asp74Val	4.5
74	p.Asp74Tyr	4.9
74	p.Asp74Cys	4.2
74	p.Asp74Trp	5.8
74	p.Asp74Phe	4.3
75	p.Pro75Asn	4.3
75	p.Pro75Lys	5.6
75	p.Pro75Thr	4.8
75	p.Pro75Arg	5.8
75	p.Pro75Ser	4
75	p.Pro75Ile	4
75	p.Pro75Met	4.3
75	p.Pro75His	4.5
75	p.Pro75Gln	5
75	p.Pro75Pro	8.8
75	p.Pro75Leu	4.4
75	p.Pro75Asp	4.3
75	p.Pro75Glu	5.6
75	p.Pro75Ala	4.3
75	p.Pro75Gly	4.6
75	p.Pro75Val	5.5
75	p.Pro75Tyr	5.7
75	p.Pro75Cys	4
75	p.Pro75Trp	5.3
75	p.Pro75Phe	5.2
76	p.Ala76Asn	3.8
76	p.Ala76Lys	5.3
76	p.Ala76Thr	4.5
76	p.Ala76Arg	3.6
76	p.Ala76Ser	4.5
76	p.Ala76Ile	2.5
76	p.Ala76Met	5.2
76	p.Ala76His	5.1
76	p.Ala76Gln	4
76	p.Ala76Pro	5.3
76	p.Ala76Leu	3.3
76	p.Ala76Asp	4.3
76	p.Ala76Glu	12.4
76	p.Ala76Ala	5
76	p.Ala76Gly	4.4
76	p.Ala76Val	9.4
76	p.Ala76Tyr	3.4
76	p.Ala76Cys	4.5
76	p.Ala76Trp	5.8
76	p.Ala76Phe	3.5
77	p.Thr77Asn	10.6
77	p.Thr77Lys	5.2
77	p.Thr77Thr	14.2
77	p.Thr77Arg	3.9
77	p.Thr77Ser	5.1
77	p.Thr77Ile	6.4
77	p.Thr77Met	2.6
77	p.Thr77His	2.8
77	p.Thr77Gln	3.1
77	p.Thr77Pro	6.2
77	p.Thr77Leu	4.6
77	p.Thr77Asp	2.4
77	p.Thr77Glu	4.2
77	p.Thr77Ala	5.5
77	p.Thr77Gly	5.1
77	p.Thr77Val	5.2
77	p.Thr77Tyr	3.1
77	p.Thr77Cys	5
77	p.Thr77Trp	2.6
77	p.Thr77Phe	2.1
78	p.Leu78Asn	5.4
78	p.Leu78Lys	6.5
78	p.Leu78Thr	4
78	p.Leu78Arg	4.1
78	p.Leu78Ser	2.9
78	p.Leu78Ile	6.4
78	p.Leu78Met	9.5
78	p.Leu78His	5.5
78	p.Leu78Gln	7
78	p.Leu78Pro	4.4
78	p.Leu78Leu	6.1
78	p.Leu78Asp	8.3
78	p.Leu78Glu	4.1
78	p.Leu78Ala	1.8
78	p.Leu78Gly	1.7
78	p.Leu78Val	5.8
78	p.Leu78Tyr	4.6
78	p.Leu78Cys	3.8
78	p.Leu78Trp	3.9
78	p.Leu78Phe	4.2
79	p.Thr79Asn	6.1
79	p.Thr79Lys	5
79	p.Thr79Thr	8.2
79	p.Thr79Arg	2.9
79	p.Thr79Ser	3.8
79	p.Thr79Ile	4.1
79	p.Thr79Met	5.8
79	p.Thr79His	5.2
79	p.Thr79Gln	4.6
79	p.Thr79Pro	3.8
79	p.Thr79Leu	4.7
79	p.Thr79Asp	3.8
79	p.Thr79Glu	3.7
79	p.Thr79Ala	5.6
79	p.Thr79Gly	6.7
79	p.Thr79Val	6.8
79	p.Thr79Tyr	2.9
79	p.Thr79Cys	5.8
79	p.Thr79Trp	6.1
79	p.Thr79Phe	4.5
80	p.Arg80Asn	4.5
80	p.Arg80Lys	5.3
80	p.Arg80Thr	2.6
80	p.Arg80Arg	12.6
80	p.Arg80Ser	9.9
80	p.Arg80Ile	3.3
80	p.Arg80Met	4
80	p.Arg80His	3.8
80	p.Arg80Gln	4.3
80	p.Arg80Pro	4.1
80	p.Arg80Leu	4.5
80	p.Arg80Asp	5.3
80	p.Arg80Glu	4.2
80	p.Arg80Ala	4.4
80	p.Arg80Gly	5.1
80	p.Arg80Val	4.4
80	p.Arg80Tyr	5.2
80	p.Arg80Cys	3.4
80	p.Arg80Trp	5.8
80	p.Arg80Phe	3.4
81	p.Pro81Asn	5.8
81	p.Pro81Lys	3.9
81	p.Pro81Thr	5
81	p.Pro81Arg	5.7
81	p.Pro81Ser	5.2
81	p.Pro81Ile	3.1
81	p.Pro81Met	4.5
81	p.Pro81His	5.3
81	p.Pro81Gln	5
81	p.Pro81Pro	9.4
81	p.Pro81Leu	3.8
81	p.Pro81Asp	3.8
81	p.Pro81Glu	4.8
81	p.Pro81Ala	4.7
81	p.Pro81Gly	3.5
81	p.Pro81Val	4.4
81	p.Pro81Tyr	5
81	p.Pro81Cys	5.9
81	p.Pro81Trp	5.7
81	p.Pro81Phe	5.4
82	p.Val82Asn	3.3
82	p.Val82Lys	4.1
82	p.Val82Thr	6.5
82	p.Val82Arg	5.4
82	p.Val82Ser	4.5
82	p.Val82Ile	4.1
82	p.Val82Met	4.4
82	p.Val82His	5.5
82	p.Val82Gln	5.2
82	p.Val82Pro	4.7
82	p.Val82Leu	6
82	p.Val82Asp	3.8
82	p.Val82Glu	4.5
82	p.Val82Ala	5.4
82	p.Val82Gly	4
82	p.Val82Val	11.1
82	p.Val82Tyr	3.2
82	p.Val82Cys	4.6
82	p.Val82Trp	3.2
82	p.Val82Phe	6.4
83	p.His83Asn	5.4
83	p.His83Lys	5.1
83	p.His83Thr	3.7
83	p.His83Arg	4.3
83	p.His83Ser	4.5
83	p.His83Ile	4.1
83	p.His83Met	4.1
83	p.His83His	9.3
83	p.His83Gln	8.1
83	p.His83Pro	4.7
83	p.His83Leu	4.4
83	p.His83Asp	4.2
83	p.His83Glu	5.1
83	p.His83Ala	4.8
83	p.His83Gly	5.9
83	p.His83Val	3.6
83	p.His83Tyr	4.9
83	p.His83Cys	3.6
83	p.His83Trp	4.1
83	p.His83Phe	5.9
84	p.Asp84Asn	2.9
84	p.Asp84Lys	5.2
84	p.Asp84Thr	3.1
84	p.Asp84Arg	4.6
84	p.Asp84Ser	4.3
84	p.Asp84Ile	4.8
84	p.Asp84Met	4.2
84	p.Asp84His	4.9
84	p.Asp84Gln	4.3
84	p.Asp84Pro	4.9
84	p.Asp84Leu	5.3
84	p.Asp84Asp	7.6
84	p.Asp84Glu	9.1
84	p.Asp84Ala	5.6
84	p.Asp84Gly	4.3
84	p.Asp84Val	4.4
84	p.Asp84Tyr	5
84	p.Asp84Cys	5.6
84	p.Asp84Trp	4.5
84	p.Asp84Phe	5.1
85	p.Ala85Asn	3.7
85	p.Ala85Lys	4
85	p.Ala85Thr	7.2
85	p.Ala85Arg	2.8
85	p.Ala85Ser	4.3
85	p.Ala85Ile	4.5
85	p.Ala85Met	2.7
85	p.Ala85His	3.9
85	p.Ala85Gln	3
85	p.Ala85Pro	6.6
85	p.Ala85Leu	4.6
85	p.Ala85Asp	10.4
85	p.Ala85Glu	4.3
85	p.Ala85Ala	10.3
85	p.Ala85Gly	7.5
85	p.Ala85Val	5.3
85	p.Ala85Tyr	2.7
85	p.Ala85Cys	4
85	p.Ala85Trp	3.3
85	p.Ala85Phe	4.9
86	p.Ala86Asn	3.9
86	p.Ala86Lys	3
86	p.Ala86Thr	2.2
86	p.Ala86Arg	4.7
86	p.Ala86Ser	3.1
86	p.Ala86Ile	4.8
86	p.Ala86Met	4.9
86	p.Ala86His	5.7
86	p.Ala86Gln	6.9
86	p.Ala86Pro	4.2
86	p.Ala86Leu	6
86	p.Ala86Asp	4.5
86	p.Ala86Glu	13.1
86	p.Ala86Ala	4.4
86	p.Ala86Gly	3.4
86	p.Ala86Val	7.9
86	p.Ala86Tyr	4.1
86	p.Ala86Cys	4.1
86	p.Ala86Trp	3.8
86	p.Ala86Phe	5.1
87	p.Arg87Asn	6.8
87	p.Arg87Lys	3.4
87	p.Arg87Thr	3.8
87	p.Arg87Arg	5.1
87	p.Arg87Ser	4.5
87	p.Arg87Ile	4.3
87	p.Arg87Met	6
87	p.Arg87His	4.2
87	p.Arg87Gln	5.5
87	p.Arg87Pro	4.9
87	p.Arg87Leu	4.2
87	p.Arg87Asp	3.6
87	p.Arg87Glu	5.9
87	p.Arg87Ala	4.9
87	p.Arg87Gly	4
87	p.Arg87Val	5.1
87	p.Arg87Tyr	3.4
87	p.Arg87Cys	6.7
87	p.Arg87Trp	6.6
87	p.Arg87Phe	7.2
88	p.Glu88Asn	4.6
88	p.Glu88Lys	5.3
88	p.Glu88Thr	2.7
88	p.Glu88Arg	4.5
88	p.Glu88Ser	3.3
88	p.Glu88Ile	3.1
88	p.Glu88Met	5.8
88	p.Glu88His	4.2
88	p.Glu88Gln	3.8
88	p.Glu88Pro	3.3
88	p.Glu88Leu	4.3
88	p.Glu88Asp	11
88	p.Glu88Glu	8.4
88	p.Glu88Ala	3.1
88	p.Glu88Gly	4.5
88	p.Glu88Val	7.8
88	p.Glu88Tyr	5.9
88	p.Glu88Cys	4.6
88	p.Glu88Trp	5.6
88	p.Glu88Phe	4.3
89	p.Gly89Asn	4
89	p.Gly89Lys	5.3
89	p.Gly89Thr	4.1
89	p.Gly89Arg	4.5
89	p.Gly89Ser	5
89	p.Gly89Ile	4.1
89	p.Gly89Met	4.3
89	p.Gly89His	4.1
89	p.Gly89Gln	5.1
89	p.Gly89Pro	4.8
89	p.Gly89Leu	4.5
89	p.Gly89Asp	5.2
89	p.Gly89Glu	6.9
89	p.Gly89Ala	3.6
89	p.Gly89Gly	4.9
89	p.Gly89Val	7.7
89	p.Gly89Tyr	3.8
89	p.Gly89Cys	5
89	p.Gly89Trp	7.4
89	p.Gly89Phe	5.7
90	p.Phe90Asn	7.3
90	p.Phe90Lys	5.6
90	p.Phe90Thr	4
90	p.Phe90Arg	5.8
90	p.Phe90Ser	5
90	p.Phe90Ile	4.3
90	p.Phe90Met	4.1
90	p.Phe90His	3
90	p.Phe90Gln	3.3
90	p.Phe90Pro	4.8
90	p.Phe90Leu	4.8
90	p.Phe90Asp	4.3
90	p.Phe90Glu	5.4
90	p.Phe90Ala	3
90	p.Phe90Gly	4.7
90	p.Phe90Val	5.4
90	p.Phe90Tyr	5.4
90	p.Phe90Cys	5.8
90	p.Phe90Trp	5.3
90	p.Phe90Phe	8.8
91	p.Leu91Asn	4.1
91	p.Leu91Lys	3.3
91	p.Leu91Thr	3.6
91	p.Leu91Arg	4.7
91	p.Leu91Ser	4.5
91	p.Leu91Ile	9
91	p.Leu91Met	4.8
91	p.Leu91His	5.7
91	p.Leu91Gln	3.2
91	p.Leu91Pro	11.3
91	p.Leu91Leu	6.3
91	p.Leu91Asp	3.3
91	p.Leu91Glu	4.1
91	p.Leu91Ala	4.1
91	p.Leu91Gly	4
91	p.Leu91Val	4.2
91	p.Leu91Tyr	3.2
91	p.Leu91Cys	3.7
91	p.Leu91Trp	4.4
91	p.Leu91Phe	8.4
92	p.Asp92Asn	3.7
92	p.Asp92Lys	3.8
92	p.Asp92Thr	3.8
92	p.Asp92Arg	3.5
92	p.Asp92Ser	2.7
92	p.Asp92Ile	5.8
92	p.Asp92Met	6.3
92	p.Asp92His	2.8
92	p.Asp92Gln	5.5
92	p.Asp92Pro	5.5
92	p.Asp92Leu	5.3
92	p.Asp92Asp	6.8
92	p.Asp92Glu	8.1
92	p.Asp92Ala	5.8
92	p.Asp92Gly	5
92	p.Asp92Val	7.3
92	p.Asp92Tyr	3.8
92	p.Asp92Cys	6.2
92	p.Asp92Trp	3.6
92	p.Asp92Phe	4.8
93	p.Thr93Asn	9.2
93	p.Thr93Lys	3.1
93	p.Thr93Thr	13.5
93	p.Thr93Arg	4
93	p.Thr93Ser	3.7
93	p.Thr93Ile	6.2
93	p.Thr93Met	3.8
93	p.Thr93His	4.1
93	p.Thr93Gln	3.9
93	p.Thr93Pro	10.3
93	p.Thr93Leu	3.1
93	p.Thr93Asp	2.8
93	p.Thr93Glu	1.6
93	p.Thr93Ala	6.5
93	p.Thr93Gly	4.9
93	p.Thr93Val	3.3
93	p.Thr93Tyr	3.8
93	p.Thr93Cys	4.3
93	p.Thr93Trp	3.7
93	p.Thr93Phe	4.2
94	p.Leu94Asn	3.7
94	p.Leu94Lys	5.7
94	p.Leu94Thr	5.4
94	p.Leu94Arg	6.4
94	p.Leu94Ser	4.1
94	p.Leu94Ile	4.5
94	p.Leu94Met	2.1
94	p.Leu94His	5
94	p.Leu94Gln	3.8
94	p.Leu94Pro	3.7
94	p.Leu94Leu	10.6
94	p.Leu94Asp	4.9
94	p.Leu94Glu	3.8
94	p.Leu94Ala	3.7
94	p.Leu94Gly	3.2
94	p.Leu94Val	6.1
94	p.Leu94Tyr	5
94	p.Leu94Cys	5.2
94	p.Leu94Trp	6.6
94	p.Leu94Phe	6.5
95	p.Val95Asn	3.9
95	p.Val95Lys	4.7
95	p.Val95Thr	3.7
95	p.Val95Arg	5.1
95	p.Val95Ser	4.4
95	p.Val95Ile	8.2
95	p.Val95Met	2.8
95	p.Val95His	0.8
95	p.Val95Gln	1.5
95	p.Val95Pro	3.1
95	p.Val95Leu	2.8
95	p.Val95Asp	5.7
95	p.Val95Glu	4.6
95	p.Val95Ala	5.3
95	p.Val95Gly	8.5
95	p.Val95Val	8.5
95	p.Val95Tyr	2.7
95	p.Val95Cys	3.2
95	p.Val95Trp	4
95	p.Val95Phe	16.5
96	p.Val96Asn	4
96	p.Val96Lys	4.5
96	p.Val96Thr	2.1
96	p.Val96Arg	3.5
96	p.Val96Ser	4.4
96	p.Val96Ile	7.2
96	p.Val96Met	3.4
96	p.Val96His	3.1
96	p.Val96Gln	3.9
96	p.Val96Pro	2.2
96	p.Val96Leu	4.6
96	p.Val96Asp	7.2
96	p.Val96Glu	3.8
96	p.Val96Ala	6.9
96	p.Val96Gly	11.5
96	p.Val96Val	5.3
96	p.Val96Tyr	3
96	p.Val96Cys	3.8
96	p.Val96Trp	4.2
96	p.Val96Phe	11.5
97	p.Leu97Asn	4.3
97	p.Leu97Lys	5.7
97	p.Leu97Thr	3.2
97	p.Leu97Arg	3.8
97	p.Leu97Ser	5.7
97	p.Leu97Ile	5.2
97	p.Leu97Met	5.4
97	p.Leu97His	3.5
97	p.Leu97Gln	5.5
97	p.Leu97Pro	3.4
97	p.Leu97Leu	7.2
97	p.Leu97Asp	5.1
97	p.Leu97Glu	6
97	p.Leu97Ala	3.9
97	p.Leu97Gly	5.7
97	p.Leu97Val	5.3
97	p.Leu97Tyr	4.4
97	p.Leu97Cys	4.6
97	p.Leu97Trp	6.6
97	p.Leu97Phe	5.3
98	p.His98Asn	4.1
98	p.His98Lys	4.1
98	p.His98Thr	2.3
98	p.His98Arg	4.2
98	p.His98Ser	4.7
98	p.His98Ile	3.8
98	p.His98Met	4.4
98	p.His98His	7.3
98	p.His98Gln	12
98	p.His98Pro	3.1
98	p.His98Leu	4.1
98	p.His98Asp	4.7
98	p.His98Glu	6.5
98	p.His98Ala	4
98	p.His98Gly	5
98	p.His98Val	6.5
98	p.His98Tyr	6
98	p.His98Cys	4
98	p.His98Trp	5.3
98	p.His98Phe	4.1
99	p.Arg99Asn	4.2
99	p.Arg99Lys	4.3
99	p.Arg99Thr	4.5
99	p.Arg99Arg	8.9
99	p.Arg99Ser	5.7
99	p.Arg99Ile	5.4
99	p.Arg99Met	4.2
99	p.Arg99His	4.8
99	p.Arg99Gln	3
99	p.Arg99Pro	5.1
99	p.Arg99Leu	3.9
99	p.Arg99Asp	4.9
99	p.Arg99Glu	5
99	p.Arg99Ala	6.2
99	p.Arg99Gly	4.9
99	p.Arg99Val	4
99	p.Arg99Tyr	4.2
99	p.Arg99Cys	5.4
99	p.Arg99Trp	6.9
99	p.Arg99Phe	4.5
100	p.Ala100Asn	6.8
100	p.Ala100Lys	8.6
100	p.Ala100Thr	6.2
100	p.Ala100Arg	8.2
100	p.Ala100Ser	2.7
100	p.Ala100Ile	5.8
100	p.Ala100Met	8.7
100	p.Ala100His	5.3
100	p.Ala100Gln	4.4
100	p.Ala100Pro	4.7
100	p.Ala100Leu	4.9
100	p.Ala100Asp	1.2
100	p.Ala100Glu	4.6
100	p.Ala100Ala	4.1
100	p.Ala100Gly	0.2
100	p.Ala100Val	5.4
100	p.Ala100Tyr	4.6
100	p.Ala100Cys	3.5
[truncated: 1,122 more rows]
