# Supplementary material for: Functional characterization of all CDKN2A missense variants and comparison to in silico models of pathogenicity
Source: eLife. 2025 Apr 16;13:RP95347. doi: 10.7554/eLife.95347 (PMC12002794; doi:10.7554/eLife.95347)
Supplement: Supplementary file 3. [file elife-95347-supp3.xlsx]

## Sheet: Appendix 1-table 3
Supplementary File 3. Proportion of each variant in residues R24, H66, and A127.
Residue	Variant	ACMG Guidline Classification	Percent (%)		Read count
			Amplified plasmid library	Day 9 cells	Amplified plasmid library	Day 9 cells
24	p.Arg24Asn	VUS	4.55745	4.34282	8516	4567
24	p.Arg24Lys	VUS	5.15308	4.80782	9629	5056
24	p.Arg24Thr	VUS	4.41509	4.18212	8250	4398
24	p.Arg24Arg	Synonymous	4.92136	6.32453	9196	6651
24	p.Arg24Ser	VUS	5.08619	5.00086	9504	5259
24	p.Arg24Ile	VUS	4.01533	4.12506	7503	4338
24	p.Arg24Met	VUS	4.84215	5.22337	9048	5493
24	p.Arg24His	VUS	5.23817	5.06647	9788	5328
24	p.Arg24Gln	VUS	5.64169	5.28993	10542	5563
24	p.Arg24Pro	Pathogenic	3.64071	3.78559	6803	3981
24	p.Arg24Leu	VUS	4.45202	4.31525	8319	4538
24	p.Arg24Asp	VUS	7.12998	6.91409	13323	7271
24	p.Arg24Glu	VUS	5.1868	5.08644	9692	5349
24	p.Arg24Ala	VUS	4.52052	4.27721	8447	4498
24	p.Arg24Gly	VUS	4.06456	4.01	7595	4217
24	p.Arg24Val	VUS	6.47547	6.42247	12100	6754
24	p.Arg24Tyr	VUS	4.57725	4.56153	8553	4797
24	p.Arg24Cys	VUS	4.47717	4.39988	8366	4627
24	p.Arg24Trp	VUS	6.22983	6.65164	11641	6995
24	p.Arg24Phe	VUS	5.37518	5.21291	10044	5482
66	p.His66Asn	VUS	4.70554	3.52466	5574	1413
66	p.His66Lys	VUS	5.85449	4.48003	6935	1796
66	p.His66Thr	VUS	4.7047	3.597	5573	1442
66	p.His66Arg	VUS	5.24752	4.84921	6216	1944
66	p.His66Ser	VUS	5.09725	4.56734	6038	1831
66	p.His66Ile	VUS	4.83386	5.03629	5726	2019
66	p.His66Met	VUS	5.29986	3.80902	6278	1527
66	p.His66His	Synonymous	3.8757	4.944	4591	1982
66	p.His66Gln	VUS	5.27622	8.89271	6250	3565
66	p.His66Pro	VUS	6.12886	6.0665	7260	2432
66	p.His66Leu	VUS	5.55058	5.83202	6575	2338
66	p.His66Asp	VUS	2.77403	2.91601	3286	1169
66	p.His66Glu	VUS	6.10269	6.03657	7229	2420
66	p.His66Ala	VUS	5.41467	5.95425	6414	2387
66	p.His66Gly	VUS	5.56071	5.23834	6587	2100
66	p.His66Val	VUS	4.58398	4.47255	5430	1793
66	p.His66Tyr	VUS	4.54515	4.66213	5384	1869
66	p.His66Cys	VUS	4.5308	4.6297	5367	1856
66	p.His66Trp	VUS	5.40032	5.55015	6397	2225
66	p.His66Phe	VUS	4.51307	4.94151	5346	1981
127	p.Ala127Asn	Benign	4.62219	4.36562	3844	6274
127	p.Ala127Lys	VUS	4.36607	4.35657	3631	6261
127	p.Ala127Thr	VUS	4.44062	3.99196	3693	5737
127	p.Ala127Arg	VUS	5.84628	5.78997	4862	8321
127	p.Ala127Ser	VUS	4.95046	5.38013	4117	7732
127	p.Ala127Ile	VUS	4.80977	4.91949	4000	7070
127	p.Ala127Met	VUS	5.79337	6.01055	4818	8638
127	p.Ala127His	VUS	4.24342	4.30647	3529	6189
127	p.Ala127Gln	VUS	5.08994	5.49703	4233	7900
127	p.Ala127Pro	VUS	2.84258	2.62883	2364	3778
127	p.Ala127Leu	VUS	5.06108	4.7351	4209	6805
127	p.Ala127Asp	VUS	6.03987	6.53103	5023	9386
127	p.Ala127Glu	VUS	6.07474	5.59792	5052	8045
127	p.Ala127Ala	Synonymous	4.26627	3.68231	3548	5292
127	p.Ala127Gly	VUS	4.74845	4.73788	3949	6809
127	p.Ala127Val	VUS	6.33447	6.83371	5268	9821
127	p.Ala127Tyr	VUS	4.32759	3.85766	3599	5544
127	p.Ala127Cys	VUS	4.44423	4.93132	3696	7087
127	p.Ala127Trp	VUS	5.96652	5.92357	4962	8513
127	p.Ala127Phe	VUS	5.73205	5.92287	4767	8512
