# Supplementary material for: Functional characterization of all CDKN2A missense variants and comparison to in silico models of pathogenicity
Source: eLife. 2025 Apr 16;13:RP95347. doi: 10.7554/eLife.95347 (PMC12002794; doi:10.7554/eLife.95347)
Supplement: Supplementary file 4. [file elife-95347-supp4.xlsx]

## Sheet: Appendix 1-table 4
Supplementary File 4. Assay outputs and functional classifications for all possible CDKN2A missense and synonymous variants.
Residue	Variant	Benchmark	Functionally reported VUS	Experiment_1				Experiment_2				Experiment_1		Experiment_2		Merged
				Read count		Proportion		Read count		Proportion
				Day 9_1	Confluent_1	Day 9_1	Confluent_1	Day 9_2	Confluent_2	Day 9_2	Confluent_2	Log P value_1	Fucntional characterization_1	Log P value_2	Fucntional characterization_2	Log P value_merged	Fucntional characterization_merged
1	p.Met1Asn			7917	3240	4.45008	4.27311					-0.153162	Neutral			-0.153162	Neutral
1	p.Met1Lys			10656	3866	5.98965	5.09872					-0.0081691	Neutral			-0.0081691	Neutral
1	p.Met1Thr			8682	3625	4.88008	4.78087					-0.136213	Neutral			-0.136213	Neutral
1	p.Met1Arg			4562	1607	2.56426	2.11941					-0.217716	Neutral			-0.217716	Neutral
1	p.Met1Ser			14850	6066	8.34706	8.00021					-0.00932415	Neutral			-0.00932415	Neutral
1	p.Met1Ile			5660	2304	3.18144	3.03866					-0.43845	Neutral			-0.43845	Neutral
1	p.Met1Met	Synonymous		5258	2332	2.95548	3.07558					-1.06151	Neutral			-1.06151	Neutral
1	p.Met1His			5078	2285	2.8543	3.0136					-1.27452	Neutral			-1.27452	Neutral
1	p.Met1Gln			9585	4102	5.38765	5.40997					-0.124207	Neutral			-0.124207	Neutral
1	p.Met1Pro			5141	1985	2.88971	2.61794					-0.362427	Neutral			-0.362427	Neutral
1	p.Met1Leu			14664	6252	8.24251	8.24552					-0.0189802	Neutral			-0.0189802	Neutral
1	p.Met1Asp			14894	5681	8.37179	7.49245					-0.00297522	Neutral			-0.00297522	Neutral
1	p.Met1Glu			5078	2195	2.8543	2.8949					-0.957436	Neutral			-0.957436	Neutral
1	p.Met1Ala			8804	3502	4.94865	4.61865					-0.0729548	Neutral			-0.0729548	Neutral
1	p.Met1Gly			6523	2720	3.66652	3.5873					-0.355291	Neutral			-0.355291	Neutral
1	p.Met1Val			11052	7911	6.21223	10.4335					-4.15828	Neutral			-4.15828	Neutral
1	p.Met1Tyr			12992	5282	7.30269	6.96622					-0.0170434	Neutral			-0.0170434	Neutral
1	p.Met1Cys			14675	5858	8.24869	7.72589					-0.00688575	Neutral			-0.00688575	Neutral
1	p.Met1Trp			3926	1599	2.20677	2.10886					-1.15442	Neutral			-1.15442	Neutral
1	p.Met1Phe			7910	3411	4.44614	4.49863					-0.26512	Neutral			-0.26512	Neutral
2	p.Glu2Asn			6727	2813	4.9928	2.49754					-2.75495e-14	Neutral			0	Neutral
2	p.Glu2Lys			6744	5413	5.00542	4.80596					-2.54348e-06	Neutral			-2.54333e-06	Neutral
2	p.Glu2Thr			5212	4425	3.86836	3.92876					-6.20529e-05	Neutral			-6.20528e-05	Neutral
2	p.Glu2Arg			5222	2299	3.87578	2.04118					-1.87529e-12	Neutral			0	Neutral
2	p.Glu2Ser			4630	6041	3.4364	5.36353					-0.134278	Neutral			-0.134278	Neutral
2	p.Glu2Ile			7541	3779	5.59695	3.3552					-2.35484e-12	Neutral			0	Neutral
2	p.Glu2Met			6300	7369	4.67588	6.5426					-0.0076299	Neutral			-0.0076299	Neutral
2	p.Glu2His			7815	6349	5.80032	5.63699					-1.04841e-06	Neutral			-1.04827e-06	Neutral
2	p.Glu2Gln			9277	5087	6.88542	4.51652					-4.48079e-12	Neutral			0	Neutral
2	p.Glu2Pro			8059	5092	5.98142	4.52096					-1.08704e-09	Neutral			-9.42766e-10	Neutral
2	p.Glu2Leu			7335	3699	5.44406	3.28418					-3.76675e-12	Neutral			0	Neutral
2	p.Glu2Asp			4954	1515	3.67687	1.3451					0	Neutral			0	Neutral
2	p.Glu2Glu	Synonymous		9092	18647	6.74811	16.5558					-1.06151	Neutral			-1.06151	Neutral
2	p.Glu2Ala			6504	8164	4.82729	7.24845					-0.0190685	Neutral			-0.0190685	Neutral
2	p.Glu2Gly			5629	4118	4.17786	3.65619					-1.15946e-06	Neutral			-1.15932e-06	Neutral
2	p.Glu2Val			6747	3223	5.00764	2.86156					-1.6874e-12	Neutral			0	Neutral
2	p.Glu2Tyr			4650	2961	3.45124	2.62894					-1.78054e-07	Neutral			-1.7791e-07	Neutral
2	p.Glu2Cys			6088	7985	4.51853	7.08952					-0.0474457	Neutral			-0.0474457	Neutral
2	p.Glu2Trp			7642	6902	5.67192	6.12798					-1.49009e-05	Neutral			-1.49008e-05	Neutral
2	p.Glu2Phe			8566	6750	6.35771	5.99302					-2.30693e-07	Neutral			-2.30548e-07	Neutral
3	p.Pro3Asn			10479	4032	5.9826	5.43433					-7.64279	Indeterminate			-7.64279	Indeterminate
3	p.Pro3Lys			6030	2500	3.44261	3.3695					-18.3908	Indeterminate			-18.3908	Indeterminate
3	p.Pro3Thr			8211	3197	4.68777	4.30892					-10.8027	Indeterminate			-10.8027	Indeterminate
3	p.Pro3Arg			8154	5051	4.65523	6.80774					-40.1854	Indeterminate			-33.2078	Indeterminate
3	p.Pro3Ser			7465	3568	4.26187	4.80895					-22.543	Indeterminate			-22.5421	Indeterminate
3	p.Pro3Ile			6870	2552	3.92217	3.43958					-11.2729	Indeterminate			-11.2729	Indeterminate
3	p.Pro3Met			6862	3240	3.91761	4.36687					-23.5385	Indeterminate			-23.5368	Indeterminate
3	p.Pro3His			6669	2007	3.80742	2.70503					-5.10522	Neutral			-5.10522	Neutral
3	p.Pro3Gln			7887	1624	4.50279	2.18883					-0.277201	Neutral			-0.277201	Neutral
3	p.Pro3Pro	Synonymous		12225	3414	6.97941	4.60139					-1.06151	Neutral			-1.06151	Neutral
3	p.Pro3Leu			7911	3359	4.51649	4.52726					-15.0229	Indeterminate			-15.0229	Indeterminate
3	p.Pro3Asp			11034	5168	6.29946	6.96543					-14.4442	Indeterminate			-14.4442	Indeterminate
3	p.Pro3Glu			8543	2741	4.87731	3.69432					-4.69786	Neutral			-4.69786	Neutral
3	p.Pro3Ala			7836	2325	4.47368	3.13363					-3.70166	Neutral			-3.70166	Neutral
3	p.Pro3Gly			9287	7121	5.30207	9.59768					-53.1508	Deleterious			-53.1508	Deleterious
3	p.Pro3Val			11755	5610	6.71108	7.56116					-14.3405	Indeterminate			-14.3405	Indeterminate
3	p.Pro3Tyr			8286	2722	4.73059	3.66871					-5.47143	Neutral			-5.47143	Neutral
3	p.Pro3Cys			9700	4045	5.53786	5.45185					-11.3156	Indeterminate			-11.3156	Indeterminate
3	p.Pro3Trp			7181	3898	4.09973	5.25372					-32.4603	Indeterminate			-31.7904	Indeterminate
3	p.Pro3Phe			12773	6021	7.29227	8.1151					-12.5831	Indeterminate			-12.5831	Indeterminate
4	p.Ala4Asn			6496	5119	5.5537	5.96585					-5.7084	Neutral			-5.7084	Neutral
4	p.Ala4Lys			5599	3201	4.78682	3.73055					-1.30657	Neutral			-1.30657	Neutral
4	p.Ala4Thr			6049	9770	5.17154	11.3863					-51.415	Indeterminate			-33.2193	Indeterminate
4	p.Ala4Arg			6946	4316	5.93843	5.03001					-1.41365	Neutral			-1.41365	Neutral
4	p.Ala4Ser			5204	8721	4.44912	10.1637					-53.1508	Deleterious			-53.1508	Deleterious
4	p.Ala4Ile			5102	2244	4.36191	2.61523					-0.179384	Neutral			-0.179384	Neutral
4	p.Ala4Met			6306	5309	5.39126	6.18729					-7.81165	Indeterminate			-7.81165	Indeterminate
4	p.Ala4His			9180	6186	7.84837	7.20937					-1.30832	Neutral			-1.30832	Neutral
4	p.Ala4Gln			4555	2044	3.89426	2.38215					-0.321119	Neutral			-0.321119	Neutral
4	p.Ala4Pro			4683	2290	4.00369	2.66884					-0.633092	Neutral			-0.633092	Neutral
4	p.Ala4Leu			6006	3343	5.13478	3.89604					-0.913963	Neutral			-0.913963	Neutral
4	p.Ala4Asp			4923	3133	4.20888	3.6513					-3.19665	Neutral			-3.19665	Neutral
4	p.Ala4Glu			5399	2024	4.61583	2.35884					-0.0189242	Neutral			-0.0189242	Neutral
4	p.Ala4Ala	Synonymous		6423	3731	5.49129	4.34823					-1.06151	Neutral			-1.06151	Neutral
4	p.Ala4Gly			5628	4372	4.81161	5.09527					-6.57652	Indeterminate			-6.57652	Indeterminate
4	p.Ala4Val			6269	2830	5.35963	3.29818					-0.112064	Neutral			-0.112064	Neutral
4	p.Ala4Tyr			5640	2955	4.82187	3.44386					-0.6716	Neutral			-0.6716	Neutral
4	p.Ala4Cys			4485	5419	3.83441	6.31548					-33.2924	Indeterminate			-32.2554	Indeterminate
4	p.Ala4Trp			6700	4351	5.72811	5.0708					-2.0165	Neutral			-2.0165	Neutral
4	p.Ala4Phe			5374	4447	4.59446	5.18268					-8.96267	Indeterminate			-8.96267	Indeterminate
5	p.Ala5Asn			10398	3217	7.07708	4.46899					-0.0101671	Neutral			-0.0101671	Neutral
5	p.Ala5Lys			6616	943	4.50298	1.31					-1.3215e-08	Neutral			-1.30707e-08	Neutral
5	p.Ala5Thr			7235	2897	4.92428	4.02445					-0.767901	Neutral			-0.767901	Neutral
5	p.Ala5Arg			6763	1495	4.60303	2.07682					-0.000335369	Neutral			-0.000335369	Neutral
5	p.Ala5Ser			6901	7643	4.69695	10.6175					-45.8707	Indeterminate			-33.2191	Indeterminate
5	p.Ala5Ile			9416	1133	6.40871	1.57394					-3.61555e-12	Neutral			0	Neutral
5	p.Ala5Met			6059	2031	4.12387	2.82142					-0.269612	Neutral			-0.269612	Neutral
5	p.Ala5His			9217	3925	6.27327	5.45252					-0.660951	Neutral			-0.660951	Neutral
5	p.Ala5Gln			8603	3685	5.85537	5.11912					-0.829139	Neutral			-0.829139	Neutral
5	p.Ala5Pro			8547	2852	5.81725	3.96194					-0.0722544	Neutral			-0.0722544	Neutral
5	p.Ala5Leu			10779	7833	7.3364	10.8814					-9.2129	Indeterminate			-9.2129	Indeterminate
5	p.Ala5Asp			7000	3082	4.76434	4.28145					-1.62525	Neutral			-1.62525	Neutral
5	p.Ala5Glu			5477	2907	3.72775	4.03834					-6.4829	Indeterminate			-6.4829	Indeterminate
5	p.Ala5Ala	Synonymous		5728	2216	3.89859	3.07842					-1.06151	Neutral			-1.06151	Neutral
5	p.Ala5Gly			4494	1339	3.0587	1.86011					-0.223667	Neutral			-0.223667	Neutral
5	p.Ala5Val			8831	3044	6.01055	4.22866					-0.0938781	Neutral			-0.0938781	Neutral
5	p.Ala5Tyr			4625	8628	3.14786	11.9858					-53.1508	Deleterious			-53.1508	Deleterious
5	p.Ala5Cys			5753	2808	3.9156	3.90081					-4.13793	Neutral			-4.13793	Neutral
5	p.Ala5Trp			8851	8353	6.02416	11.6038					-25.5354	Indeterminate			-25.5284	Indeterminate
5	p.Ala5Phe			5632	1954	3.83325	2.71445					-0.466113	Neutral			-0.466113	Neutral
6	p.Gly6Asn			5526	2196	5.53103	2.96013					-0.0928869	Neutral			-0.0928869	Neutral
6	p.Gly6Lys			5673	3312	5.67817	4.46445					-2.24828	Neutral			-2.24828	Neutral
6	p.Gly6Thr			4626	2843	4.63021	3.83226					-4.21789	Neutral			-4.21789	Neutral
6	p.Gly6Arg			4400	8247	4.40401	11.1167					-53.1508	Deleterious			-53.1508	Deleterious
6	p.Gly6Ser			5199	7507	5.20374	10.1192					-52	Indeterminate			-33.2193	Indeterminate
6	p.Gly6Ile			4539	7126	4.54313	9.60559					-53.1508	Deleterious			-53.1508	Deleterious
6	p.Gly6Met			7887	11562	7.89418	15.5852					-39.8137	Indeterminate			-33.2044	Indeterminate
6	p.Gly6His			4522	1360	4.52612	1.83323					-0.00449888	Neutral			-0.00449888	Neutral
6	p.Gly6Gln			4363	1586	4.36697	2.13787					-0.081732	Neutral			-0.081732	Neutral
6	p.Gly6Pro			3564	3083	3.56725	4.15577					-20.2742	Indeterminate			-20.274	Indeterminate
6	p.Gly6Leu			6157	3203	6.16261	4.31753					-0.871824	Neutral			-0.871824	Neutral
6	p.Gly6Asp			4366	1905	4.36998	2.56787					-0.530546	Neutral			-0.530546	Neutral
6	p.Gly6Glu			5386	2616	5.39091	3.52627					-0.722487	Neutral			-0.722487	Neutral
6	p.Gly6Ala			6037	2648	6.0425	3.56941					-0.201416	Neutral			-0.201416	Neutral
6	p.Gly6Gly	Synonymous		2942	1230	2.94468	1.65799					-1.06151	Neutral			-1.06151	Neutral
6	p.Gly6Val			7551	3158	7.55788	4.25687					-0.0481888	Neutral			-0.0481888	Neutral
6	p.Gly6Tyr			3436	1449	3.43913	1.9532					-0.769399	Neutral			-0.769399	Neutral
6	p.Gly6Cys			3736	2856	3.7394	3.84978					-13.2334	Indeterminate			-13.2334	Indeterminate
6	p.Gly6Trp			5083	3058	5.08763	4.12207					-3.24294	Neutral			-3.24294	Neutral
6	p.Gly6Phe			4916	3241	4.92048	4.36875					-5.31449	Neutral			-5.31449	Neutral
7	p.Ser7Asn			21503	2770	5.63902	3.84573					-0.0701176	Neutral			-0.0701176	Neutral
7	p.Ser7Lys			17957	2366	4.70911	3.28483					-0.181096	Neutral			-0.181096	Neutral
7	p.Ser7Thr			26503	7810	6.95024	10.843					-11.2009	Indeterminate			-11.2009	Indeterminate
7	p.Ser7Arg			20121	2384	5.2766	3.30982					-0.031303	Neutral			-0.031303	Neutral
7	p.Ser7Ser	Synonymous		13032	1887	3.41756	2.61981					-1.06151	Neutral			-1.06151	Neutral
7	p.Ser7Ile			21968	3908	5.76097	5.42567					-1.33147	Neutral			-1.33147	Neutral
7	p.Ser7Met			25433	4362	6.66964	6.05598					-0.711968	Neutral			-0.711968	Neutral
7	p.Ser7His			23901	5103	6.26788	7.08474					-3.32077	Neutral			-3.32077	Neutral
7	p.Ser7Gln			25626	4097	6.72025	5.68807					-0.381866	Neutral			-0.381866	Neutral
7	p.Ser7Pro			30865	5648	8.09415	7.8414					-0.714893	Neutral			-0.714893	Neutral
7	p.Ser7Leu			22752	5920	5.96656	8.21903					-8.56509	Indeterminate			-8.56509	Indeterminate
7	p.Ser7Asp			13045	1864	3.42097	2.58788					-0.961352	Neutral			-0.961352	Neutral
7	p.Ser7Glu			5274	1263	1.38307	1.75348					-29.542	Indeterminate			-29.4334	Indeterminate
7	p.Ser7Ala			13797	3900	3.61817	5.41456					-19.5076	Indeterminate			-19.5075	Indeterminate
7	p.Ser7Gly			34546	4664	9.05946	6.47526					-0.015514	Neutral			-0.015514	Neutral
7	p.Ser7Val			6451	937	1.69173	1.30088					-4.25173	Neutral			-4.25173	Neutral
7	p.Ser7Tyr			14033	5213	3.68006	7.23746					-38.9454	Indeterminate			-33.1923	Indeterminate
7	p.Ser7Cys			15237	2771	3.9958	3.84712					-3.13666	Neutral			-3.13666	Neutral
7	p.Ser7Trp			10664	2020	2.79656	2.80446					-6.59517	Indeterminate			-6.59517	Indeterminate
7	p.Ser7Phe			18617	3141	4.88219	4.3608					-1.34949	Neutral			-1.34949	Neutral
8	p.Ser8Asn			5102	2754	5.51097	4.25769					-0.00102609	Neutral			-0.00102609	Neutral
8	p.Ser8Lys			3518	5765	3.8	8.9127					-21.1143	Indeterminate			-21.114	Indeterminate
8	p.Ser8Thr			5291	4626	5.71512	7.1518					-0.541212	Neutral			-0.541212	Neutral
8	p.Ser8Arg			4648	3049	5.02058	4.71376					-0.0381298	Neutral			-0.0381298	Neutral
8	p.Ser8Ser	Synonymous		5221	4953	5.63951	7.65734					-1.06151	Neutral			-1.06151	Neutral
8	p.Ser8Ile			6586	4481	7.11392	6.92763					-0.0122242	Neutral			-0.0122242	Neutral
8	p.Ser8Met			3576	1885	3.86265	2.91421					-0.00532519	Neutral			-0.00532519	Neutral
8	p.Ser8His			4006	2293	4.32712	3.54498					-0.0108545	Neutral			-0.0108545	Neutral
8	p.Ser8Gln			5026	3177	5.42888	4.91165					-0.0156015	Neutral			-0.0156015	Neutral
8	p.Ser8Pro			3368	2661	3.63797	4.11391					-0.803325	Neutral			-0.803325	Neutral
8	p.Ser8Leu			4268	3385	4.61012	5.23321					-0.430869	Neutral			-0.430869	Neutral
8	p.Ser8Asp			5645	3906	6.0975	6.03868					-0.0327619	Neutral			-0.0327619	Neutral
8	p.Ser8Glu			5235	2231	5.65463	3.44913					-6.17332e-06	Neutral			-6.17318e-06	Neutral
8	p.Ser8Ala			3572	2303	3.85833	3.56044					-0.0927807	Neutral			-0.0927807	Neutral
8	p.Ser8Gly			4071	3170	4.39733	4.90082					-0.420653	Neutral			-0.420653	Neutral
8	p.Ser8Val			5367	3622	5.79721	5.59962					-0.0292478	Neutral			-0.0292478	Neutral
8	p.Ser8Tyr			4234	2444	4.57339	3.77843					-0.0092971	Neutral			-0.0092971	Neutral
8	p.Ser8Cys			4875	2414	5.26577	3.73205					-0.000261652	Neutral			-0.000261652	Neutral
8	p.Ser8Trp			5137	2823	5.54877	4.36436					-0.00136633	Neutral			-0.00136633	Neutral
8	p.Ser8Phe			3833	2741	4.14025	4.23759					-0.225006	Neutral			-0.225006	Neutral
9	p.Met9Asn			7469	3933	4.84063	4.80554					-0.21139	Neutral			-0.21139	Neutral
9	p.Met9Lys			9609	5540	6.22756	6.76906					-0.227138	Neutral			-0.227138	Neutral
9	p.Met9Thr		Neutral	8791	5010	5.69742	6.12148					-0.271973	Neutral			-0.271973	Neutral
9	p.Met9Arg			10762	5831	6.97481	7.12462					-0.0740179	Neutral			-0.0740179	Neutral
9	p.Met9Ser			5046	2796	3.2703	3.4163					-1.02459	Neutral			-1.02459	Neutral
9	p.Met9Ile			8383	4731	5.43299	5.78058					-0.288455	Neutral			-0.288455	Neutral
9	p.Met9Met	Synonymous		3169	1512	2.05382	1.84744					-1.06151	Neutral			-1.06151	Neutral
9	p.Met9His			4318	2163	2.79848	2.64286					-0.704535	Neutral			-0.704535	Neutral
9	p.Met9Gln			5190	2565	3.36362	3.13405					-0.371005	Neutral			-0.371005	Neutral
9	p.Met9Pro			6382	3588	4.13615	4.384					-0.627337	Neutral			-0.627337	Neutral
9	p.Met9Leu			8726	3851	5.65529	4.70535					-0.0113556	Neutral			-0.0113556	Neutral
9	p.Met9Asp			9850	5446	6.38375	6.6542					-0.132766	Neutral			-0.132766	Neutral
9	p.Met9Glu			8636	4204	5.59696	5.13666					-0.0480903	Neutral			-0.0480903	Neutral
9	p.Met9Ala			8064	4131	5.22625	5.04747					-0.118714	Neutral			-0.118714	Neutral
9	p.Met9Gly			6394	3368	4.14393	4.1152					-0.352363	Neutral			-0.352363	Neutral
9	p.Met9Val			8528	5087	5.52697	6.21556					-0.457554	Neutral			-0.457554	Neutral
9	p.Met9Tyr			9867	4712	6.39477	5.75736					-0.0200581	Neutral			-0.0200581	Neutral
9	p.Met9Cys			8011	4120	5.1919	5.03403					-0.127272	Neutral			-0.127272	Neutral
9	p.Met9Trp			9040	4855	5.85879	5.93209					-0.131926	Neutral			-0.131926	Neutral
9	p.Met9Phe			8063	4400	5.2256	5.37615					-0.234834	Neutral			-0.234834	Neutral
10	p.Glu10Asn			6098	2242	4.2106	3.54282					-2.65169	Neutral			-2.65169	Neutral
10	p.Glu10Lys			5462	4301	3.77145	6.79645					-41.3	Indeterminate			-33.214	Indeterminate
10	p.Glu10Thr			5428	2183	3.74797	3.44958					-5.04252	Neutral			-5.04252	Neutral
10	p.Glu10Arg			6859	2202	4.73606	3.47961					-0.851577	Neutral			-0.851577	Neutral
10	p.Glu10Ser			4238	2388	2.92629	3.77353					-22.0191	Indeterminate			-22.0185	Indeterminate
10	p.Glu10Ile			5736	3004	3.96064	4.74693					-13.0107	Indeterminate			-13.0107	Indeterminate
10	p.Glu10Met			10083	5755	6.9622	9.09407					-9.11935	Indeterminate			-9.11935	Indeterminate
10	p.Glu10His			7085	5545	4.89211	8.76223					-33.2073	Indeterminate			-32.2133	Indeterminate
10	p.Glu10Gln			8938	2836	6.17159	4.48146					-0.36833	Neutral			-0.36833	Neutral
10	p.Glu10Pro			9004	3151	6.21716	4.97922					-0.825205	Neutral			-0.825205	Neutral
10	p.Glu10Leu			4693	1833	3.24046	2.89651					-5.49066	Neutral			-5.49066	Neutral
10	p.Glu10Asp			7860	3023	5.42724	4.77695					-2.11752	Neutral			-2.11752	Neutral
10	p.Glu10Glu	Synonymous		7526	2567	5.19662	4.05638					-1.06151	Neutral			-1.06151	Neutral
10	p.Glu10Ala			3045	1836	2.10254	2.90125					-34.821	Indeterminate			-32.8084	Indeterminate
10	p.Glu10Gly			7598	2700	5.24633	4.26655					-1.38055	Neutral			-1.38055	Neutral
10	p.Glu10Val			8257	2931	5.70136	4.63158					-1.13293	Neutral			-1.13293	Neutral
10	p.Glu10Tyr			11783	5357	8.13603	8.46515					-2.55884	Neutral			-2.55884	Neutral
10	p.Glu10Cys			11223	4410	7.74935	6.9687					-1.13063	Neutral			-1.13063	Neutral
10	p.Glu10Trp			7320	2533	5.05438	4.00265					-1.25365	Neutral			-1.25365	Neutral
10	p.Glu10Phe			6589	2486	4.54963	3.92839					-2.6539	Neutral			-2.6539	Neutral
11	p.Pro11Asn			8506	1300	5.16041	5.14709					-1.31891	Neutral			-1.31891	Neutral
11	p.Pro11Lys			6439	1122	3.9064	4.44233					-4.62946	Neutral			-4.62946	Neutral
11	p.Pro11Thr			5725	1120	3.47323	4.43441					-8.8407	Indeterminate			-8.8407	Indeterminate
11	p.Pro11Arg			6357	933	3.85665	3.69403					-1.89516	Neutral			-1.89516	Neutral
11	p.Pro11Ser			8111	1330	4.92077	5.26587					-2.26605	Neutral			-2.26605	Neutral
11	p.Pro11Ile			8262	1268	5.01238	5.02039					-1.44716	Neutral			-1.44716	Neutral
11	p.Pro11Met			12247	1773	7.42999	7.01984					-0.320524	Neutral			-0.320524	Neutral
11	p.Pro11His			7706	1174	4.67506	4.64822					-1.60399	Neutral			-1.60399	Neutral
11	p.Pro11Gln			8805	1147	5.3418	4.54132					-0.332961	Neutral			-0.332961	Neutral
11	p.Pro11Pro	Synonymous		6518	884	3.95433	3.50002					-1.06151	Neutral			-1.06151	Neutral
11	p.Pro11Leu		Neutral	7222	1095	4.38143	4.33543					-1.78338	Neutral			-1.78338	Neutral
11	p.Pro11Asp			10405	1506	6.31249	5.9627					-0.521979	Neutral			-0.521979	Neutral
11	p.Pro11Glu			7910	1079	4.79883	4.27208					-0.6798	Neutral			-0.6798	Neutral
11	p.Pro11Ala			12124	1807	7.35537	7.15445					-0.432519	Neutral			-0.432519	Neutral
11	p.Pro11Gly			8624	1400	5.23199	5.54302					-1.88995	Neutral			-1.88995	Neutral
11	p.Pro11Val			8786	1298	5.33028	5.13917					-0.961132	Neutral			-0.961132	Neutral
11	p.Pro11Tyr			7352	1214	4.4603	4.80659					-2.83112	Neutral			-2.83112	Neutral
11	p.Pro11Cys			7776	1069	4.71753	4.23249					-0.756537	Neutral			-0.756537	Neutral
11	p.Pro11Trp			7900	1402	4.79276	5.55094					-3.64218	Neutral			-3.64218	Neutral
11	p.Pro11Phe			8057	1336	4.88801	5.28962					-2.4474	Neutral			-2.4474	Neutral
12	p.Ser12Asn			4278	1302	3.9535	3.62947					-1.2352	Neutral			-1.2352	Neutral
12	p.Ser12Lys			4907	1159	4.53478	3.23084					-0.0751683	Neutral			-0.0751683	Neutral
12	p.Ser12Thr			5668	1434	5.23806	3.99744					-0.096657	Neutral			-0.096657	Neutral
12	p.Ser12Arg			4891	1365	4.52	3.80509					-0.440716	Neutral			-0.440716	Neutral
12	p.Ser12Ser	Synonymous		5874	1944	5.42843	5.41912					-1.06151	Neutral			-1.06151	Neutral
12	p.Ser12Ile			4931	1318	4.55696	3.67407					-0.287313	Neutral			-0.287313	Neutral
12	p.Ser12Met			5639	1332	5.21126	3.7131					-0.0416774	Neutral			-0.0416774	Neutral
12	p.Ser12His			5177	1913	4.7843	5.3327					-2.76018	Neutral			-2.76018	Neutral
12	p.Ser12Gln			6165	2351	5.69736	6.55368					-2.37954	Neutral			-2.37954	Neutral
12	p.Ser12Pro			6926	1787	6.40064	4.98146					-0.0541579	Neutral			-0.0541579	Neutral
12	p.Ser12Leu			7110	5519	6.57068	15.3848					-28.4751	Indeterminate			-28.4223	Indeterminate
12	p.Ser12Asp			6223	1364	5.75096	3.8023					-0.00873438	Neutral			-0.00873438	Neutral
12	p.Ser12Glu			3816	1115	3.52654	3.10819					-1.21135	Neutral			-1.21135	Neutral
12	p.Ser12Ala			4304	1215	3.97752	3.38695					-0.695052	Neutral			-0.695052	Neutral
12	p.Ser12Gly			6165	1672	5.69736	4.66089					-0.155158	Neutral			-0.155158	Neutral
12	p.Ser12Val			3830	1433	3.53948	3.99465					-4.84958	Neutral			-4.84958	Neutral
12	p.Ser12Tyr			5082	1268	4.69651	3.53469					-0.125212	Neutral			-0.125212	Neutral
12	p.Ser12Cys			5540	2071	5.11977	5.77314					-2.59861	Neutral			-2.59861	Neutral
12	p.Ser12Trp			4602	1720	4.25292	4.79469					-3.5987	Neutral			-3.5987	Neutral
12	p.Ser12Phe			7080	2591	6.54295	7.2227					-1.3872	Neutral			-1.3872	Neutral
13	p.Ala13Asn			4218	1562	5.36785	4.39109					-0.00189937	Neutral			-0.00189937	Neutral
13	p.Ala13Lys			3029	1313	3.85472	3.69111					-0.0988746	Neutral			-0.0988746	Neutral
13	p.Ala13Thr			3969	1691	5.05097	4.75374					-0.0246688	Neutral			-0.0246688	Neutral
13	p.Ala13Arg			4846	1789	6.16704	5.02924					-0.000772947	Neutral			-0.000772947	Neutral
13	p.Ala13Ser			6020	2315	7.66108	6.50793					-0.000425616	Neutral			-0.000425616	Neutral
13	p.Ala13Ile			3905	1553	4.96952	4.36579					-0.00958103	Neutral			-0.00958103	Neutral
13	p.Ala13Met			5301	3446	6.74608	9.68739					-0.815427	Neutral			-0.815427	Neutral
13	p.Ala13His			3118	1431	3.96798	4.02283					-0.1689	Neutral			-0.1689	Neutral
13	p.Ala13Gln			3692	1490	4.69846	4.18869					-0.0159167	Neutral			-0.0159167	Neutral
13	p.Ala13Pro			4393	1429	5.59055	4.0172					-0.000120958	Neutral			-0.000120958	Neutral
13	p.Ala13Leu			2886	1301	3.67274	3.65737					-0.183513	Neutral			-0.183513	Neutral
13	p.Ala13Asp			4736	1965	6.02706	5.52401					-0.00679096	Neutral			-0.00679096	Neutral
13	p.Ala13Glu			3561	1393	4.53175	3.916					-0.0119163	Neutral			-0.0119163	Neutral
13	p.Ala13Ala	Synonymous		3906	2377	4.97079	6.68222					-1.06151	Neutral			-1.06151	Neutral
13	p.Ala13Gly			3294	1146	4.19196	3.22163					-0.00268239	Neutral			-0.00268238	Neutral
13	p.Ala13Val			3458	1473	4.40067	4.1409					-0.0459748	Neutral			-0.0459748	Neutral
13	p.Ala13Tyr			3988	2503	5.07515	7.03643					-1.25658	Neutral			-1.25658	Neutral
13	p.Ala13Cys			2683	1335	3.4144	3.75295					-0.585973	Neutral			-0.585973	Neutral
13	p.Ala13Trp			2538	1184	3.22987	3.32846					-0.391948	Neutral			-0.391948	Neutral
13	p.Ala13Phe			5038	2876	6.41138	8.08501					-0.30771	Neutral			-0.30771	Neutral
14	p.Asp14Asn			3574	1772	3.95985	3.00849					-3.69852	Neutral			-3.69852	Neutral
14	p.Asp14Lys			4011	1920	4.44403	3.25976					-2.50417	Neutral			-2.50417	Neutral
14	p.Asp14Thr			5279	2173	5.84892	3.6893					-0.449314	Neutral			-0.449314	Neutral
14	p.Asp14Arg			3601	2556	3.98976	4.33956					-15.0659	Indeterminate			-15.0659	Indeterminate
14	p.Asp14Ser			4983	1986	5.52096	3.37182					-0.399345	Neutral			-0.399345	Neutral
14	p.Asp14Ile			4429	4433	4.90715	7.52632					-32.3062	Indeterminate			-31.6917	Indeterminate
14	p.Asp14Met			3172	2437	3.51445	4.13752					-21.5948	Indeterminate			-21.5943	Indeterminate
14	p.Asp14His			4685	1942	5.19079	3.29711					-0.667058	Neutral			-0.667058	Neutral
14	p.Asp14Gln			5284	2584	5.85446	4.3871					-1.64371	Neutral			-1.64371	Neutral
14	p.Asp14Pro			4429	4941	4.90715	8.38879					-41.7491	Indeterminate			-33.2154	Indeterminate
14	p.Asp14Leu			6098	4767	6.75634	8.09338					-11.6421	Indeterminate			-11.6421	Indeterminate
14	p.Asp14Asp	Synonymous		4519	1967	5.00687	3.33956					-1.06151	Neutral			-1.06151	Neutral
14	p.Asp14Glu			4387	2080	4.86062	3.53141					-1.99067	Neutral			-1.99067	Neutral
14	p.Asp14Ala			3103	1857	3.438	3.1528					-10.0129	Indeterminate			-10.0129	Indeterminate
14	p.Asp14Gly			5701	2590	6.31648	4.39728					-0.822077	Neutral			-0.822077	Neutral
14	p.Asp14Val			5632	6061	6.24003	10.2903					-31.7307	Indeterminate			-31.2909	Indeterminate
14	p.Asp14Tyr			4781	4014	5.29715	6.81494					-18.8491	Indeterminate			-18.8491	Indeterminate
14	p.Asp14Cys			4284	1950	4.7465	3.3107					-1.62234	Neutral			-1.62234	Neutral
14	p.Asp14Trp			4208	3422	4.66229	5.80985					-19.434	Indeterminate			-19.4339	Indeterminate
14	p.Asp14Phe			4096	3448	4.5382	5.85399					-21.9892	Indeterminate			-21.9886	Indeterminate
15	p.Trp15Asn			6806	1782	4.70307	5.3202	11345	3522	4.52565	3.40389	-7.5941	Indeterminate	-0.021428	Neutral	-4.96507	Neutral
15	p.Trp15Lys			7236	1725	5.00021	5.15002	13768	4227	5.49222	4.08524	-4.65698	Neutral	-0.0067839	Neutral	-2.58219	Neutral
15	p.Trp15Thr			5550	1595	3.83515	4.7619	9633	4223	3.84272	4.08138	-13.5314	Indeterminate	-1.28935	Neutral	-11.3259	Indeterminate
15	p.Trp15Arg			5767	1195	3.9851	3.5677	9685	2686	3.86346	2.59592	-3.39334	Neutral	-0.00863529	Neutral	-1.65434	Neutral
15	p.Trp15Ser			7958	1900	5.49912	5.67249	13848	4083	5.52413	3.94607	-4.03689	Neutral	-0.00336033	Neutral	-2.11407	Neutral
15	p.Trp15Ile			5763	1034	3.98234	3.08703	9127	3846	3.64087	3.71702	-1.4705	Neutral	-1.10883	Neutral	-1.10017	Neutral
15	p.Trp15Met			5274	1033	3.64443	3.08404	9117	3643	3.63688	3.52083	-2.95043	Neutral	-0.746984	Neutral	-1.86438	Neutral
15	p.Trp15His			4145	1068	2.86427	3.18854	7396	5106	2.95035	4.93476	-12.9967	Indeterminate	-15.3136	Indeterminate	-23.9441	Indeterminate
15	p.Trp15Gln			7425	1883	5.13081	5.62173	12925	6246	5.15593	6.03653	-5.90915	Indeterminate	-1.28767	Neutral	-4.61463	Neutral
15	p.Trp15Pro			4346	1381	3.00316	4.123	8773	5495	3.49965	5.31072	-23.2627	Indeterminate	-9.0474	Indeterminate	-27.7606	Indeterminate
15	p.Trp15Leu			12335	2792	8.52371	8.33557	22595	11054	9.01341	10.6833	-1.28267	Neutral	-0.316046	Neutral	-0.522741	Neutral
15	p.Trp15Asp			11922	2648	8.23832	7.90566	18631	8445	7.43213	8.16179	-1.21733	Neutral	-0.280686	Neutral	-0.470616	Neutral
15	p.Trp15Glu			10331	1960	7.13891	5.85162	16533	7828	6.59521	7.56548	-0.520197	Neutral	-0.595663	Neutral	-0.289297	Neutral
15	p.Trp15Ala			8846	2089	6.11275	6.23675	15101	4990	6.02397	4.82265	-3.19962	Neutral	-0.0132495	Neutral	-1.52268	Neutral
15	p.Trp15Gly			5208	1067	3.59882	3.18555	9097	5665	3.6289	5.47502	-3.80165	Neutral	-8.45789	Indeterminate	-9.01196	Indeterminate
15	p.Trp15Val			4607	847	3.18352	2.52874	7933	2119	3.16457	2.04794	-2.66885	Neutral	-0.0134518	Neutral	-1.16668	Neutral
15	p.Trp15Tyr			8482	2468	5.86122	7.36826	14113	5497	5.62984	5.31265	-8.61129	Indeterminate	-0.151468	Neutral	-5.94026	Indeterminate
15	p.Trp15Cys			6277	1646	4.33752	4.91417	12412	4374	4.95129	4.22731	-8.48005	Indeterminate	-0.0778029	Neutral	-5.76461	Neutral
15	p.Trp15Trp	Synonymous		6045	1051	4.1772	3.13778	9713	4153	3.87463	4.01372	-1.06151	Neutral	-1.06151	Neutral	-0.81759	Neutral
15	p.Trp15Phe			10391	2331	7.18037	6.95925	18937	6268	7.55419	6.05779	-1.75608	Neutral	-0.00409704	Neutral	-0.609578	Neutral
16	p.Leu16Asn			3055	6743	4.59046	5.24874					-53.1508	Deleterious			-53.1508	Deleterious
16	p.Leu16Lys			5427	16967	8.15465	13.2071					-53.1508	Deleterious			-53.1508	Deleterious
16	p.Leu16Thr			2209	660	3.31926	0.513743					-27.579	Indeterminate			-27.5504	Indeterminate
16	p.Leu16Arg	Pathogenic		3583	13291	5.38384	10.3457					-53.1508	Deleterious			-53.1508	Deleterious
16	p.Leu16Ser			3934	6544	5.91126	5.09384					-53.1508	Deleterious			-53.1508	Deleterious
16	p.Leu16Ile			1553	269	2.33355	0.209389					-6.96395	Indeterminate			-6.96395	Indeterminate
16	p.Leu16Met			1995	306	2.9977	0.23819					-2.6344	Neutral			-2.6344	Neutral
16	p.Leu16His			4913	10696	7.38231	8.32574					-53.1508	Deleterious			-53.1508	Deleterious
16	p.Leu16Gln			4828	10448	7.25459	8.1327					-53.1508	Deleterious			-53.1508	Deleterious
16	p.Leu16Pro	Pathogenic		2946	6033	4.42668	4.69607					-53.1508	Deleterious			-53.1508	Deleterious
16	p.Leu16Leu	Synonymous		1846	239	2.77381	0.186037					-1.06151	Neutral			-1.06151	Neutral
16	p.Leu16Asp			3226	10025	4.84741	7.80344					-53.1508	Deleterious			-53.1508	Deleterious
16	p.Leu16Glu			4055	11396	6.09307	8.87062					-53.1508	Deleterious			-53.1508	Deleterious
16	p.Leu16Ala			3236	2061	4.86244	1.60428					-53.1508	Deleterious			-53.1508	Deleterious
16	p.Leu16Gly			4238	10949	6.36805	8.52268					-53.1508	Deleterious			-53.1508	Deleterious
16	p.Leu16Val			3046	804	4.57694	0.625832					-14.2093	Indeterminate			-14.2093	Indeterminate
16	p.Leu16Tyr			3070	8610	4.613	6.70201					-53.1508	Deleterious			-53.1508	Deleterious
16	p.Leu16Cys			2604	687	3.91279	0.534759					-16.6972	Indeterminate			-16.6972	Indeterminate
16	p.Leu16Trp			4013	11211	6.02996	8.72662					-53.1508	Deleterious			-53.1508	Deleterious
16	p.Leu16Phe			2774	530	4.16823	0.412551					-4.61327	Neutral			-4.61327	Neutral
17	p.Ala17Asn			3109	1043	5.29696	1.20376					-9.84008	Indeterminate			-9.84008	Indeterminate
17	p.Ala17Lys			3328	25579	5.67009	29.5216					-53.1508	Deleterious			-53.1508	Deleterious
17	p.Ala17Thr			2004	476	3.41432	0.549368					-4.29934	Neutral			-4.29934	Neutral
17	p.Ala17Arg			3397	27882	5.78764	32.1796					-53.1508	Deleterious			-53.1508	Deleterious
17	p.Ala17Ser			3222	774	5.48949	0.8933					-1.95733	Neutral			-1.95733	Neutral
17	p.Ala17Ile			3809	1359	6.48959	1.56847					-9.63251	Indeterminate			-9.63251	Indeterminate
17	p.Ala17Met			1845	1285	3.14342	1.48306					-53.1508	Deleterious			-53.1508	Deleterious
17	p.Ala17His			2589	622	4.41101	0.717872					-2.96335	Neutral			-2.96335	Neutral
17	p.Ala17Gln			3620	2691	6.16758	3.10578					-53.1508	Deleterious			-53.1508	Deleterious
17	p.Ala17Pro			3101	714	5.28333	0.824052					-1.62651	Neutral			-1.62651	Neutral
17	p.Ala17Leu			2565	3353	4.37012	3.86981					-53.1508	Deleterious			-53.1508	Deleterious
17	p.Ala17Asp			3473	2181	5.91713	2.51717					-49.8301	Indeterminate			-33.2193	Indeterminate
17	p.Ala17Glu			2642	8434	4.50131	9.73397					-53.1508	Deleterious			-53.1508	Deleterious
17	p.Ala17Ala	Synonymous		2835	595	4.83014	0.68671					-1.06151	Neutral			-1.06151	Neutral
17	p.Ala17Gly			3409	720	5.80809	0.830977					-0.699678	Neutral			-0.699678	Neutral
17	p.Ala17Val			3266	716	5.56445	0.82636					-1.03575	Neutral			-1.03575	Neutral
17	p.Ala17Tyr			2603	2585	4.43487	2.98344					-53.1508	Deleterious			-53.1508	Deleterious
17	p.Ala17Cys			1754	279	2.98838	0.322004					-0.4097	Neutral			-0.4097	Neutral
17	p.Ala17Trp			2913	3306	4.96303	3.81557					-53.1508	Deleterious			-53.1508	Deleterious
17	p.Ala17Phe			3210	2051	5.46904	2.36713					-53.1508	Deleterious			-53.1508	Deleterious
18	p.Thr18Asn			1065	1200	4.51042	5.38672					-40.8701	Indeterminate			-33.2121	Indeterminate
18	p.Thr18Lys			1322	1076	5.59885	4.83009					-14.0035	Indeterminate			-14.0035	Indeterminate
18	p.Thr18Thr	Synonymous		1088	483	4.60783	2.16816					-1.06151	Neutral			-1.06151	Neutral
18	p.Thr18Arg			1372	1100	5.8106	4.93783					-12.8011	Indeterminate			-12.8011	Indeterminate
18	p.Thr18Ser			1365	878	5.78096	3.94128					-5.56736	Neutral			-5.56736	Neutral
18	p.Thr18Ile			921	852	3.90056	3.82457					-28.5096	Indeterminate			-28.4555	Indeterminate
18	p.Thr18Met			1963	2078	8.31357	9.32801					-20.838	Indeterminate			-20.8377	Indeterminate
18	p.Thr18His			697	420	2.95189	1.88535					-10.3868	Indeterminate			-10.3868	Indeterminate
18	p.Thr18Gln			1320	973	5.59038	4.36773					-10.0015	Indeterminate			-10.0015	Indeterminate
18	p.Thr18Pro		Deleterious	762	3836	3.22717	17.2196					-53.1508	Deleterious			-53.1508	Deleterious
18	p.Thr18Leu			1397	1503	5.91648	6.74687					-29.4439	Indeterminate			-29.3422	Indeterminate
18	p.Thr18Asp			1125	829	4.76453	3.72133					-12.0314	Indeterminate			-12.0314	Indeterminate
18	p.Thr18Glu			1271	825	5.38286	3.70337					-6.40676	Indeterminate			-6.40676	Indeterminate
18	p.Thr18Ala			1230	1342	5.20922	6.02415					-33.8512	Indeterminate			-32.5009	Indeterminate
18	p.Thr18Gly			842	544	3.56598	2.44198					-10.6461	Indeterminate			-10.6461	Indeterminate
18	p.Thr18Val			1693	1130	7.17008	5.0725					-4.76682	Neutral			-4.76682	Neutral
18	p.Thr18Tyr			785	884	3.32458	3.96822					-51	Indeterminate			-33.2193	Indeterminate
18	p.Thr18Cys			1182	574	5.00593	2.57665					-1.61997	Neutral			-1.61997	Neutral
18	p.Thr18Trp			1679	1410	7.11079	6.3294					-11.9394	Indeterminate			-11.9394	Indeterminate
18	p.Thr18Phe			533	340	2.25733	1.52624					-16.7919	Indeterminate			-16.7919	Indeterminate
19	p.Ala19Asn			2103	1690	6.11284	2.62402					-7.88869e-08	Neutral			-7.87427e-08	Neutral
19	p.Ala19Lys			1123	2217	3.26425	3.44228					-2.41738	Neutral			-2.41738	Neutral
19	p.Ala19Thr			1850	2296	5.37744	3.56494					-0.00273282	Neutral			-0.00273282	Neutral
19	p.Ala19Arg			1712	3057	4.97631	4.74653					-0.431699	Neutral			-0.431699	Neutral
19	p.Ala19Ser			1700	1327	4.94143	2.0604					-2.28727e-07	Neutral			-2.28582e-07	Neutral
19	p.Ala19Ile			2099	2243	6.10121	3.48265					-6.77847e-05	Neutral			-6.77845e-05	Neutral
19	p.Ala19Met			1357	1021	3.94442	1.58528					-5.9232e-07	Neutral			-5.92176e-07	Neutral
19	p.Ala19His			2393	3205	6.95579	4.97632					-0.00232513	Neutral			-0.00232513	Neutral
19	p.Ala19Gln			1314	1013	3.81943	1.57286					-1.39434e-06	Neutral			-1.39419e-06	Neutral
19	p.Ala19Pro			2107	27833	6.12447	43.2156					-53.1508	Deleterious			-53.1508	Deleterious
19	p.Ala19Leu			1886	1318	5.48208	2.04642					-5.00461e-09	Neutral			-4.86034e-09	Neutral
19	p.Ala19Asp			1341	2749	3.89792	4.2683					-2.13684	Neutral			-2.13684	Neutral
19	p.Ala19Glu			2092	1938	6.08087	3.00908					-2.80865e-06	Neutral			-2.80851e-06	Neutral
19	p.Ala19Ala	Synonymous		1342	2472	3.90082	3.83821					-1.06151	Neutral			-1.06151	Neutral
19	p.Ala19Gly			1446	1223	4.20312	1.89892					-5.88924e-06	Neutral			-5.88909e-06	Neutral
19	p.Ala19Val			1157	1160	3.36308	1.8011					-0.000974384	Neutral			-0.000974384	Neutral
19	p.Ala19Tyr			1572	1657	4.56937	2.57278					-0.000363476	Neutral			-0.000363476	Neutral
19	p.Ala19Cys			1675	3514	4.86876	5.4561					-1.56098	Neutral			-1.56098	Neutral
19	p.Ala19Trp			1976	1448	5.74369	2.24827					-1.19113e-08	Neutral			-1.1767e-08	Neutral
19	p.Ala19Phe			2158	1024	6.27271	1.58994					-1.28137e-14	Neutral			0	Neutral
20	p.Ala20Asn			9582	6012	5.42533	6.62954	5392	5033	5.31976	6.9224	-53.1508	Deleterious	-53.1508	Deleterious	-53.1508	Deleterious
20	p.Ala20Lys			13641	10495	7.72354	11.573	7118	8147	7.02263	11.2054	-53.1508	Deleterious	-53.1508	Deleterious	-53.1508	Deleterious
20	p.Ala20Thr			6922	432	3.91924	0.476374	4653	296	4.59066	0.407119	-16.0617	Indeterminate	-10.1116	Indeterminate	-21.9146	Indeterminate
20	p.Ala20Arg			8181	5927	4.63208	6.53581	4101	4835	4.04605	6.65007	-53.1508	Deleterious	-53.1508	Deleterious	-53.1508	Deleterious
20	p.Ala20Ser			4887	170	2.76702	0.187462	3069	235	3.02788	0.32322	-2.25068	Neutral	-27.073	Indeterminate	-24.8899	Indeterminate
20	p.Ala20Ile			7212	2564	4.08344	2.82737	4277	1841	4.2197	2.53212	-53.1508	Deleterious	-53.1508	Deleterious	-53.1508	Deleterious
20	p.Ala20Met			8089	2111	4.57999	2.32784	4693	1696	4.63012	2.33268	-53.1508	Deleterious	-53.1508	Deleterious	-53.1508	Deleterious
20	p.Ala20His			6923	4925	3.9198	5.43089	3697	4261	3.64747	5.86059	-53.1508	Deleterious	-53.1508	Deleterious	-53.1508	Deleterious
20	p.Ala20Gln			10148	7891	5.7458	8.70155	5584	6254	5.50919	8.60177	-53.1508	Deleterious	-53.1508	Deleterious	-53.1508	Deleterious
20	p.Ala20Pro		Deleterious	9331	7379	5.28321	8.13696	5105	5579	5.0366	7.67337	-53.1508	Deleterious	-53.1508	Deleterious	-53.1508	Deleterious
20	p.Ala20Leu			9121	2392	5.16431	2.6377	5598	1953	5.523	2.68616	-53.1508	Deleterious	-53.1508	Deleterious	-53.1508	Deleterious
20	p.Ala20Asp			10217	7096	5.78487	7.82489	5645	6060	5.56937	8.33494	-53.1508	Deleterious	-53.1508	Deleterious	-53.1508	Deleterious
20	p.Ala20Glu			12616	9358	7.14318	10.3192	6694	7998	6.60431	11.0005	-53.1508	Deleterious	-53.1508	Deleterious	-53.1508	Deleterious
20	p.Ala20Ala	Synonymous		8085	296	4.57773	0.326405	5293	225	5.22208	0.309466	-1.06151	Neutral	-1.06151	Neutral	-0.81759	Neutral
20	p.Ala20Gly		Deleterious	7764	1542	4.39598	1.70039	5051	413	4.98333	0.568041	-53.1508	Deleterious	-20.6403	Indeterminate	-53.1508	Deleterious
20	p.Ala20Val			7744	325	4.38465	0.358383	5039	329	4.97149	0.452507	-2.7404	Neutral	-10.0948	Indeterminate	-9.52822	Indeterminate
20	p.Ala20Tyr			8424	6722	4.76967	7.41247	4712	5356	4.64887	7.36665	-53.1508	Deleterious	-53.1508	Deleterious	-53.1508	Deleterious
20	p.Ala20Cys			8337	361	4.72041	0.398081	5338	304	5.26648	0.418122	-2.84348	Neutral	-5.42584	Neutral	-5.51832	Neutral
20	p.Ala20Trp			9412	7408	5.32908	8.16894	4993	5865	4.9261	8.06673	-53.1508	Deleterious	-53.1508	Deleterious	-53.1508	Deleterious
20	p.Ala20Phe			9980	7279	5.65068	8.02669	5306	6026	5.23491	8.28817	-53.1508	Deleterious	-53.1508	Deleterious	-53.1508	Deleterious
21	p.Ala21Asn			1371	1131	2.98875	1.73251					-53.1508	Deleterious			-53.1508	Deleterious
21	p.Ala21Lys			2163	10988	4.71529	16.8319					-53.1508	Deleterious			-53.1508	Deleterious
21	p.Ala21Thr			1828	453	3.985	0.693923					-9.17999	Indeterminate			-9.17999	Indeterminate
21	p.Ala21Arg			1481	2986	3.22855	4.57407					-53.1508	Deleterious			-53.1508	Deleterious
21	p.Ala21Ser			1688	297	3.6798	0.454956					-2.0901	Neutral			-2.0901	Neutral
21	p.Ala21Ile			1041	426	2.26936	0.652564					-53.1508	Deleterious			-53.1508	Deleterious
21	p.Ala21Met			2168	1207	4.72619	1.84893					-53.1508	Deleterious			-53.1508	Deleterious
21	p.Ala21His			3495	5459	7.61903	8.36231					-53.1508	Deleterious			-53.1508	Deleterious
21	p.Ala21Gln			3485	3708	7.59723	5.68006					-53.1508	Deleterious			-53.1508	Deleterious
21	p.Ala21Pro			2404	15276	5.24067	23.4004					-53.1508	Deleterious			-53.1508	Deleterious
21	p.Ala21Leu			3758	1034	8.19236	1.58392					-5.31085	Neutral			-5.31085	Neutral
21	p.Ala21Asp			2436	9530	5.31043	14.5984					-53.1508	Deleterious			-53.1508	Deleterious
21	p.Ala21Glu			1636	2674	3.56645	4.09614					-53.1508	Deleterious			-53.1508	Deleterious
21	p.Ala21Ala	Synonymous		1979	331	4.31418	0.507039					-1.06151	Neutral			-1.06151	Neutral
21	p.Ala21Gly			2395	390	5.22105	0.597417					-0.522693	Neutral			-0.522693	Neutral
21	p.Ala21Val			2784	547	6.06906	0.837916					-1.47407	Neutral			-1.47407	Neutral
21	p.Ala21Tyr			2718	3295	5.92518	5.04741					-53.1508	Deleterious			-53.1508	Deleterious
21	p.Ala21Cys			2659	468	5.79656	0.716901					-0.744533	Neutral			-0.744533	Neutral
21	p.Ala21Trp			2399	3082	5.22977	4.72113					-53.1508	Deleterious			-53.1508	Deleterious
21	p.Ala21Phe			1984	1999	4.32508	3.06215					-53.1508	Deleterious			-53.1508	Deleterious
22	p.Arg22Asn			1177	1020	8.0128	2.54377					-1.24321e-07	Neutral			-1.24176e-07	Neutral
22	p.Arg22Lys			1049	2391	7.1414	5.96289					-1.44083	Neutral			-1.44083	Neutral
22	p.Arg22Thr			1153	5650	7.84941	14.0905					-27.695	Indeterminate			-27.664	Indeterminate
22	p.Arg22Arg	Synonymous		1233	2837	8.39404	7.07517					-1.06151	Neutral			-1.06151	Neutral
22	p.Arg22Ser			473	1630	3.2201	4.06504					-23.871	Indeterminate			-23.8688	Indeterminate
22	p.Arg22Ile			819	1627	5.5756	4.05756					-0.979664	Neutral			-0.979664	Neutral
22	p.Arg22Met			1029	3315	7.00524	8.26725					-8.42171	Indeterminate			-8.42171	Indeterminate
22	p.Arg22His			338	167	2.30104	0.41648					-2.42213e-09	Neutral			-2.27786e-09	Neutral
22	p.Arg22Gln			1275	1139	8.67996	2.84054					-1.3708e-07	Neutral			-1.36936e-07	Neutral
22	p.Arg22Pro			424	6555	2.88651	16.3474					-53.1508	Deleterious			-53.1508	Deleterious
22	p.Arg22Leu			617	764	4.20042	1.90533					-0.0164725	Neutral			-0.0164725	Neutral
22	p.Arg22Asp			324	671	2.20573	1.6734					-6.68565	Indeterminate			-6.68565	Indeterminate
22	p.Arg22Glu			737	522	5.01736	1.30181					-3.7323e-08	Neutral			-3.71788e-08	Neutral
22	p.Arg22Ala			310	287	2.11042	0.715746					-0.00627285	Neutral			-0.00627285	Neutral
22	p.Arg22Gly			323	2465	2.19892	6.14744					-53.1508	Deleterious			-53.1508	Deleterious
22	p.Arg22Val			312	367	2.12404	0.915258					-0.156059	Neutral			-0.156059	Neutral
22	p.Arg22Tyr			596	1333	4.05746	3.32436					-3.7907	Neutral			-3.7907	Neutral
22	p.Arg22Cys			639	324	4.35019	0.80802					-1.15804e-11	Neutral			0	Neutral
22	p.Arg22Trp			1319	4784	8.97951	11.9308					-9.6384	Indeterminate			-9.6384	Indeterminate
22	p.Arg22Phe			542	2250	3.68984	5.61125					-34.228	Indeterminate			-32.6372	Indeterminate
23	p.Gly23Asn			1971	217	4.59516	0.667528					-21.58	Indeterminate			-21.5796	Indeterminate
23	p.Gly23Lys			2291	2054	5.3412	6.31844					-53.1508	Deleterious			-53.1508	Deleterious
23	p.Gly23Thr			2549	2313	5.94269	7.11517					-53.1508	Deleterious			-53.1508	Deleterious
23	p.Gly23Arg	Likely pathogenic		2176	1816	5.07309	5.58632					-53.1508	Deleterious			-53.1508	Deleterious
23	p.Gly23Ser	Likely pathogenic		1609	285	3.75119	0.876707					-53.1508	Deleterious			-53.1508	Deleterious
23	p.Gly23Ile			2654	2752	6.18749	8.46561					-53.1508	Deleterious			-53.1508	Deleterious
23	p.Gly23Met			2276	2025	5.30623	6.22924					-53.1508	Deleterious			-53.1508	Deleterious
23	p.Gly23His			2587	2185	6.03129	6.72142					-53.1508	Deleterious			-53.1508	Deleterious
23	p.Gly23Gln			2634	2152	6.14086	6.61991					-53.1508	Deleterious			-53.1508	Deleterious
23	p.Gly23Pro			2042	1771	4.76068	5.44789					-53.1508	Deleterious			-53.1508	Deleterious
23	p.Gly23Leu			724	730	1.68792	2.2456					-53.1508	Deleterious			-53.1508	Deleterious
23	p.Gly23Asp	Pathogenic		1669	1066	3.89108	3.27919					-53.1508	Deleterious			-53.1508	Deleterious
23	p.Gly23Glu			2812	2666	6.55585	8.20106					-53.1508	Deleterious			-53.1508	Deleterious
23	p.Gly23Ala			1966	112	4.5835	0.344531					-1.28694	Neutral			-1.28694	Neutral
23	p.Gly23Gly	Synonymous		1029	46	2.39899	0.141504					-1.06151	Neutral			-1.06151	Neutral
23	p.Gly23Val			2948	2588	6.87292	7.96112					-53.1508	Deleterious			-53.1508	Deleterious
23	p.Gly23Tyr			1763	1578	4.11023	4.85419					-53.1508	Deleterious			-53.1508	Deleterious
23	p.Gly23Cys			2210	1286	5.15236	3.95595					-53.1508	Deleterious			-53.1508	Deleterious
23	p.Gly23Trp			2196	2273	5.11972	6.99213					-53.1508	Deleterious			-53.1508	Deleterious
23	p.Gly23Phe			2787	2593	6.49756	7.9765					-53.1508	Deleterious			-53.1508	Deleterious
24	p.Arg24Asn			2933	1156	4.1897	2.75002	7521	6903	4.31468	3.3796	-0.0913844	Neutral	-1.69635	Neutral	-0.624774	Neutral
24	p.Arg24Lys			3506	1119	5.00821	2.662	8038	8566	4.61127	4.19378	-0.00160448	Neutral	-3.49252	Neutral	-1.71931	Neutral
24	p.Arg24Thr			3180	1226	4.54253	2.91655	6972	8076	3.99972	3.95388	-0.0496617	Neutral	-6.38243	Neutral	-3.98362	Neutral
24	p.Arg24Arg	Synonymous		3351	1793	4.7868	4.26539	8843	7990	5.07309	3.91178	-1.06151	Neutral	-1.06151	Neutral	-0.81759	Neutral
24	p.Arg24Ser			3650	1132	5.21391	2.69293	8814	7806	5.05645	3.82169	-0.00073987	Neutral	-0.924046	Neutral	-0.2102	Neutral
24	p.Arg24Ile			2629	1067	3.75545	2.5383	6448	5232	3.69911	2.5615	-0.190961	Neutral	-1.04137	Neutral	-0.341543	Neutral
24	p.Arg24Met			3751	1815	5.35819	4.31773	9977	9768	5.72364	4.78226	-0.339824	Neutral	-1.40258	Neutral	-0.599835	Neutral
24	p.Arg24His			3570	1006	5.09964	2.39319	9360	7018	5.36968	3.4359	-0.000129065	Neutral	-0.172428	Neutral	-0.0095641	Neutral
24	p.Arg24Gln			3595	2952	5.13535	7.02255	8545	12341	4.90213	6.04196	-8.69308	Indeterminate	-11.4186	Indeterminate	-16.2106	Indeterminate
24	p.Arg24Pro	Pathogenic		2814	13992	4.01971	33.2858	7157	46361	4.10586	22.6976	-53.1508	Deleterious	-53.1508	Deleterious	-53.1508	Deleterious
24	p.Arg24Leu			2863	1249	4.08971	2.97126	7372	7029	4.2292	3.44129	-0.297637	Neutral	-2.22666	Neutral	-1.06502	Neutral
24	p.Arg24Asp			4737	1883	6.76666	4.47949	12409	9485	7.11884	4.64371	-0.0117507	Neutral	-0.0731673	Neutral	-0.00240524	Neutral
24	p.Arg24Glu			3650	1301	5.21391	3.09497	8804	9043	5.05071	4.42731	-0.00827805	Neutral	-2.43455	Neutral	-1.01348	Neutral
24	p.Arg24Ala			3165	902	4.52111	2.14578	8126	6212	4.66176	3.0413	-0.000361868	Neutral	-0.336452	Neutral	-0.034101	Neutral
24	p.Arg24Gly			2844	1050	4.06257	2.49786	7234	8057	4.15003	3.94458	-0.0457837	Neutral	-5.10217	Neutral	-2.9563	Neutral
24	p.Arg24Val			4782	1725	6.83094	4.10363	11195	10279	6.42239	5.03243	-0.00226162	Neutral	-0.659538	Neutral	-0.117092	Neutral
24	p.Arg24Tyr			3352	1179	4.78823	2.80474	8524	8763	4.89008	4.29023	-0.0104674	Neutral	-2.59895	Neutral	-1.11951	Neutral
24	p.Arg24Cys			2826	1270	4.03685	3.02122	6942	4683	3.98251	2.29272	-0.409226	Neutral	-0.160832	Neutral	-0.0896543	Neutral
24	p.Arg24Trp			4945	2525	7.06378	6.00676	11886	12036	6.81881	5.89263	-0.234421	Neutral	-1.18711	Neutral	-0.432153	Neutral
24	p.Arg24Phe			3862	1694	5.51675	4.02988	10145	8607	5.82002	4.21385	-0.109778	Neutral	-0.444885	Neutral	-0.0853363	Neutral
25	p.Val25Asn			8478	1522	4.83534	3.9379					-4.23633	Neutral			-4.23633	Neutral
25	p.Val25Lys			9210	2493	5.25283	6.45019					-17.8096	Indeterminate			-17.8096	Indeterminate
25	p.Val25Thr			8108	1182	4.62432	3.05821					-1.42407	Neutral			-1.42407	Neutral
25	p.Val25Arg			13506	2689	7.70301	6.95731					-3.2829	Neutral			-3.2829	Neutral
25	p.Val25Ser			8701	1111	4.96253	2.87451					-0.425786	Neutral			-0.425786	Neutral
25	p.Val25Ile			6987	845	3.98497	2.18629					-0.501462	Neutral			-0.501462	Neutral
25	p.Val25Met			10879	3296	6.20473	8.52781					-21.0351	Indeterminate			-21.0348	Indeterminate
25	p.Val25His			7159	812	4.08306	2.10091					-0.256165	Neutral			-0.256165	Neutral
25	p.Val25Gln			5328	592	3.03877	1.53169					-0.5247	Neutral			-0.5247	Neutral
25	p.Val25Pro			4054	267	2.31216	0.690815					-0.00191036	Neutral			-0.00191036	Neutral
25	p.Val25Leu			4540	391	2.58934	1.01164					-0.0634044	Neutral			-0.0634044	Neutral
25	p.Val25Asp			11884	3484	6.77792	9.01423					-17.5531	Indeterminate			-17.553	Indeterminate
25	p.Val25Glu			11601	1495	6.61651	3.86805					-0.183053	Neutral			-0.183053	Neutral
25	p.Val25Ala			6216	5757	3.54523	14.8952					-53.1508	Deleterious			-53.1508	Deleterious
25	p.Val25Gly			10784	3197	6.15055	8.27167					-19.9376	Indeterminate			-19.9374	Indeterminate
25	p.Val25Val	Synonymous		9182	1337	5.23686	3.45925					-1.06151	Neutral			-1.06151	Neutral
25	p.Val25Tyr			9422	3948	5.37374	10.2147					-52	Indeterminate			-33.2193	Indeterminate
25	p.Val25Cys			9741	871	5.55568	2.25356					-0.00247182	Neutral			-0.00247182	Neutral
25	p.Val25Trp			11563	2037	6.59484	5.27038					-2.22294	Neutral			-2.22294	Neutral
25	p.Val25Phe			7991	1324	4.55759	3.42561					-3.12511	Neutral			-3.12511	Neutral
26	p.Glu26Asn			2618	1398	2.55649	2.14342					-1.40929	Neutral			-1.40929	Neutral
26	p.Glu26Lys			4162	2229	4.06421	3.41751					-0.438895	Neutral			-0.438895	Neutral
26	p.Glu26Thr			1175	706	1.14739	1.08244					-9.36582	Indeterminate			-9.36582	Indeterminate
26	p.Glu26Arg			8484	4992	8.28467	7.65374					-0.101587	Neutral			-0.101587	Neutral
26	p.Glu26Ser			903	705	0.881784	1.08091					-27.4069	Indeterminate			-27.3814	Indeterminate
26	p.Glu26Ile			6233	3893	6.08656	5.96875					-0.521217	Neutral			-0.521217	Neutral
26	p.Glu26Met			5772	3272	5.63639	5.01664					-0.269975	Neutral			-0.269975	Neutral
26	p.Glu26His			3306	2308	3.22833	3.53863					-4.14743	Neutral			-4.14743	Neutral
26	p.Glu26Gln			4189	2887	4.09058	4.42635					-2.57956	Neutral			-2.57956	Neutral
26	p.Glu26Pro			9408	6512	9.18696	9.98421					-0.385668	Neutral			-0.385668	Neutral
26	p.Glu26Leu			4257	2348	4.15698	3.59996					-0.531548	Neutral			-0.531548	Neutral
26	p.Glu26Asp			3303	2162	3.2254	3.31478					-2.99544	Neutral			-2.99544	Neutral
26	p.Glu26Glu	Synonymous		5487	3596	5.35808	5.51339					-1.06151	Neutral			-1.06151	Neutral
26	p.Glu26Ala			5080	3561	4.96065	5.45973					-1.96119	Neutral			-1.96119	Neutral
26	p.Glu26Gly			2672	1759	2.60922	2.6969					-4.39166	Neutral			-4.39166	Neutral
26	p.Glu26Val			9172	5895	8.95651	9.03822					-0.202733	Neutral			-0.202733	Neutral
26	p.Glu26Tyr			3224	2365	3.14825	3.62602					-5.41735	Neutral			-5.41735	Neutral
26	p.Glu26Cys			14018	8717	13.6887	13.3649					-0.0239291	Neutral			-0.0239291	Neutral
26	p.Glu26Trp			5619	3660	5.48698	5.61152					-0.958278	Neutral			-0.958278	Neutral
26	p.Glu26Phe			3324	2258	3.2459	3.46197					-3.59229	Neutral			-3.59229	Neutral
27	p.Glu27Asn			3049	116	1.34776	0.539234	2068	545	1.18542	1.12002	-0.011523	Neutral	-19.1496	Indeterminate	-15.325	Indeterminate
27	p.Glu27Lys			23016	2287	10.1738	10.6313	16797	4397	9.62838	9.03617	-0.384966	Neutral	-0.678919	Neutral	-0.266931	Neutral
27	p.Glu27Thr			9777	1746	4.32175	8.1164	7364	2199	4.22119	4.51911	-25.4476	Indeterminate	-6.91766	Indeterminate	-27.8084	Indeterminate
27	p.Glu27Arg			9627	961	4.25544	4.46727	7549	2188	4.32724	4.49651	-3.02968	Neutral	-5.8977	Neutral	-6.08179	Indeterminate
27	p.Glu27Ser			7381	589	3.26264	2.73801	6110	1601	3.50238	3.29018	-1.34333	Neutral	-5.15421	Neutral	-4.03712	Neutral
27	p.Glu27Ile			12256	855	5.41754	3.97453	9316	2786	5.34012	5.72544	-0.0834036	Neutral	-4.97341	Neutral	-2.88525	Neutral
27	p.Glu27Met			13701	1347	6.05628	6.26162	10283	2849	5.89442	5.85491	-1.373	Neutral	-2.89638	Neutral	-2.28413	Neutral
27	p.Glu27His			11903	1119	5.26151	5.20175	8714	2582	4.99504	5.30621	-1.39105	Neutral	-5.27201	Neutral	-4.17288	Neutral
27	p.Glu27Gln			12459	1195	5.50728	5.55504	9245	2630	5.29942	5.40485	-1.43717	Neutral	-3.97704	Neutral	-3.16542	Neutral
27	p.Glu27Pro			14286	1751	6.31487	8.13964	11214	3736	6.42809	7.67776	-4.39592	Neutral	-6.0995	Neutral	-7.44669	Indeterminate
27	p.Glu27Leu			11139	661	4.92379	3.0727	8014	2183	4.59379	4.48623	-0.0143142	Neutral	-4.05646	Neutral	-2.13658	Neutral
27	p.Glu27Asp			4309	353	1.90472	1.64094	3024	1006	1.73342	2.06741	-4.295	Neutral	-25.7488	Indeterminate	-25.5881	Indeterminate
27	p.Glu27Glu	Synonymous		18925	1996	8.36545	9.27854	14627	3878	8.38449	7.96958	-1.06151	Neutral	-1.06151	Neutral	-0.81759	Neutral
27	p.Glu27Ala			10932	963	4.83229	4.47657	8227	2282	4.71588	4.68968	-1.07825	Neutral	-4.2447	Neutral	-3.09349	Neutral
27	p.Glu27Gly			3311	311	1.46357	1.4457	3177	813	1.82112	1.67078	-10.7457	Indeterminate	-11.0763	Indeterminate	-17.8107	Indeterminate
27	p.Glu27Val			18682	1607	8.25804	7.47025	14601	4170	8.36959	8.56967	-0.183521	Neutral	-1.75614	Neutral	-0.710396	Neutral
27	p.Glu27Tyr			4149	804	1.83399	3.73745	3759	949	2.15474	1.95027	-53.1508	Deleterious	-8.60361	Indeterminate	-53.1508	Deleterious
27	p.Glu27Cys			4188	379	1.85123	1.76181	3656	1088	2.09569	2.23592	-6.9433	Indeterminate	-15.6194	Indeterminate	-18.5062	Indeterminate
27	p.Glu27Trp			18527	1531	8.18953	7.11696	13839	3589	7.9328	7.37567	-0.121661	Neutral	-1.03368	Neutral	-0.306685	Neutral
27	p.Glu27Phe			14611	941	6.45853	4.3743	12869	3189	7.37677	6.55364	-0.0126393	Neutral	-0.882549	Neutral	-0.198752	Neutral
28	p.Val28Asn			9727	11536	4.96453	7.12068					-53.1508	Deleterious			-53.1508	Deleterious
28	p.Val28Lys			9389	15308	4.79202	9.44897					-53.1508	Deleterious			-53.1508	Deleterious
28	p.Val28Thr			9288	1619	4.74047	0.99934					-0.157799	Neutral			-0.157799	Neutral
28	p.Val28Arg			8484	12431	4.33012	7.67313					-53.1508	Deleterious			-53.1508	Deleterious
28	p.Val28Ser			11984	2938	6.11647	1.8135					-1.42759	Neutral			-1.42759	Neutral
28	p.Val28Ile			10439	1906	5.32792	1.17649					-0.171296	Neutral			-0.171296	Neutral
28	p.Val28Met			7038	1186	3.5921	0.732067					-0.287958	Neutral			-0.287958	Neutral
28	p.Val28His			7337	11305	3.7447	6.97809					-53.1508	Deleterious			-53.1508	Deleterious
28	p.Val28Gln			9411	9712	4.80325	5.9948					-53.1508	Deleterious			-53.1508	Deleterious
28	p.Val28Pro			8623	12625	4.40106	7.79287					-53.1508	Deleterious			-53.1508	Deleterious
28	p.Val28Leu			11339	1580	5.78727	0.975267					-0.00262742	Neutral			-0.00262742	Neutral
28	p.Val28Asp			10547	15278	5.38304	9.43046					-53.1508	Deleterious			-53.1508	Deleterious
28	p.Val28Glu			12987	12241	6.62839	7.55585					-53.1508	Deleterious			-53.1508	Deleterious
28	p.Val28Ala			11044	1828	5.63671	1.12835					-0.0421431	Neutral			-0.0421431	Neutral
28	p.Val28Gly			8378	3399	4.27602	2.09806					-20.3921	Indeterminate			-20.3919	Indeterminate
28	p.Val28Val	Synonymous		11421	2640	5.82912	1.62956					-1.06151	Neutral			-1.06151	Neutral
28	p.Val28Tyr			8913	13513	4.54907	8.341					-53.1508	Deleterious			-53.1508	Deleterious
28	p.Val28Cys			8264	1344	4.21783	0.829594					-0.111971	Neutral			-0.111971	Neutral
28	p.Val28Trp			11572	19076	5.90619	11.7748					-53.1508	Deleterious			-53.1508	Deleterious
28	p.Val28Phe			9745	10542	4.97372	6.50713					-53.1508	Deleterious			-53.1508	Deleterious
29	p.Arg29Asn			20602	4626	6.41341	6.70571					-4.64493	Neutral			-4.64493	Neutral
29	p.Arg29Lys			20053	2816	6.24251	4.08199					-0.173123	Neutral			-0.173123	Neutral
29	p.Arg29Thr			12052	2884	3.75179	4.18056					-12.0887	Indeterminate			-12.0887	Indeterminate
29	p.Arg29Arg	Synonymous		17229	2824	5.3634	4.09358					-1.06151	Neutral			-1.06151	Neutral
29	p.Arg29Ser			32631	6359	10.158	9.21781					-0.792923	Neutral			-0.792923	Neutral
29	p.Arg29Ile			15556	4861	4.84259	7.04636					-21.2007	Indeterminate			-21.2004	Indeterminate
29	p.Arg29Met			16707	2888	5.2009	4.18636					-1.63209	Neutral			-1.63209	Neutral
29	p.Arg29His			7538	1143	2.34658	1.65686					-3.49056	Neutral			-3.49056	Neutral
29	p.Arg29Gln			19103	2763	5.94677	4.00516					-0.276696	Neutral			-0.276696	Neutral
29	p.Arg29Pro			4160	10588	1.29501	15.348					-53.1508	Deleterious			-53.1508	Deleterious
29	p.Arg29Leu			19150	3168	5.9614	4.59224					-0.877085	Neutral			-0.877085	Neutral
29	p.Arg29Asp			17057	5258	5.30985	7.62184					-18.6708	Indeterminate			-18.6707	Indeterminate
29	p.Arg29Glu			13773	2739	4.28754	3.97037					-4.91564	Neutral			-4.91564	Neutral
29	p.Arg29Ala			17777	1898	5.53399	2.75128					-0.00771264	Neutral			-0.00771264	Neutral
29	p.Arg29Gly			19312	3544	6.01184	5.13727					-1.75726	Neutral			-1.75726	Neutral
29	p.Arg29Val			10545	1606	3.28266	2.32801					-1.92196	Neutral			-1.92196	Neutral
29	p.Arg29Tyr			18295	2604	5.69524	3.77468					-0.272108	Neutral			-0.272108	Neutral
29	p.Arg29Cys			22937	4095	7.1403	5.93599					-0.990231	Neutral			-0.990231	Neutral
29	p.Arg29Trp			9347	1224	2.90973	1.77427					-0.906958	Neutral			-0.906958	Neutral
29	p.Arg29Phe			7409	1098	2.30643	1.59163					-3.19442	Neutral			-3.19442	Neutral
30	p.Ala30Asn			21267	13488	5.26989	11.3455					-53.1508	Deleterious			-53.1508	Deleterious
30	p.Ala30Lys			17443	2724	4.32231	2.29131					-1.25272	Neutral			-1.25272	Neutral
30	p.Ala30Thr			24071	8424	5.96471	7.0859					-23.9611	Indeterminate			-23.9587	Indeterminate
30	p.Ala30Arg			26854	5725	6.65433	4.81562					-3.40024	Neutral			-3.40024	Neutral
30	p.Ala30Ser			20268	5206	5.02234	4.37906					-11.0629	Indeterminate			-11.0629	Indeterminate
30	p.Ala30Ile			18034	4333	4.46876	3.64473					-10.0163	Indeterminate			-10.0163	Indeterminate
30	p.Ala30Met			27133	6428	6.72346	5.40695					-5.52032	Neutral			-5.52032	Neutral
30	p.Ala30His			18096	3956	4.48412	3.32761					-6.94216	Indeterminate			-6.94216	Indeterminate
30	p.Ala30Gln			18462	4653	4.57482	3.9139					-11.5339	Indeterminate			-11.5339	Indeterminate
30	p.Ala30Pro			18318	9216	4.53914	7.75209					-53.1508	Deleterious			-53.1508	Deleterious
30	p.Ala30Leu			14439	3198	3.57793	2.69002					-9.7447	Indeterminate			-9.7447	Indeterminate
30	p.Ala30Asp			11706	4156	2.90071	3.49584					-44.6034	Indeterminate			-33.2187	Indeterminate
30	p.Ala30Glu			21369	3913	5.29516	3.29144					-2.24115	Neutral			-2.24115	Neutral
30	p.Ala30Ala	Synonymous		25468	4405	6.31088	3.70529					-1.06151	Neutral			-1.06151	Neutral
30	p.Ala30Gly			17570	10117	4.35378	8.50998					-53.1508	Deleterious			-53.1508	Deleterious
30	p.Ala30Val			33236	8979	8.23576	7.55274					-7.22425	Indeterminate			-7.22425	Indeterminate
30	p.Ala30Tyr			16045	5032	3.97589	4.2327					-25.6222	Indeterminate			-25.6147	Indeterminate
30	p.Ala30Cys			15100	4355	3.74173	3.66323					-21.5452	Indeterminate			-21.5447	Indeterminate
30	p.Ala30Trp			26402	7996	6.54232	6.72588					-14.3099	Indeterminate			-14.3099	Indeterminate
30	p.Ala30Phe			12276	2580	3.04195	2.17018					-9.79596	Indeterminate			-9.79596	Indeterminate
31	p.Leu31Asn			17658	3677	4.70496	3.62487					-15.7998	Indeterminate			-15.7998	Indeterminate
31	p.Leu31Lys			22252	3043	5.92903	2.99986					-1.83865	Neutral			-1.83865	Neutral
31	p.Leu31Thr			16130	2611	4.29783	2.57399					-7.23277	Indeterminate			-7.23277	Indeterminate
31	p.Leu31Arg			19399	2812	5.16885	2.77214					-3.30787	Neutral			-3.30787	Neutral
31	p.Leu31Ser			18159	3537	4.83845	3.48686					-12.3566	Indeterminate			-12.3566	Indeterminate
31	p.Leu31Ile			26461	3657	7.05051	3.60516					-1.35797	Neutral			-1.35797	Neutral
31	p.Leu31Met			25568	4775	6.81257	4.70731					-6.94652	Indeterminate			-6.94652	Indeterminate
31	p.Leu31His			14102	2056	3.75747	2.02685					-5.62474	Neutral			-5.62474	Neutral
31	p.Leu31Gln			20265	4695	5.39959	4.62844					-18.9814	Indeterminate			-18.9814	Indeterminate
31	p.Leu31Pro			18066	30967	4.81367	30.528					-53.1508	Deleterious			-53.1508	Deleterious
31	p.Leu31Leu	Synonymous		29114	4009	7.7574	3.95217					-1.06151	Neutral			-1.06151	Neutral
31	p.Leu31Asp			17841	8877	4.75372	8.75116					-53.1508	Deleterious			-53.1508	Deleterious
31	p.Leu31Glu			12731	2060	3.39217	2.0308					-9.75547	Indeterminate			-9.75547	Indeterminate
31	p.Leu31Ala			17448	3125	4.64901	3.0807					-9.64502	Indeterminate			-9.64502	Indeterminate
31	p.Leu31Gly			16782	2693	4.47155	2.65482					-6.61524	Indeterminate			-6.61524	Indeterminate
31	p.Leu31Val			16042	3588	4.27438	3.53714					-21.4297	Indeterminate			-21.4293	Indeterminate
31	p.Leu31Tyr			29006	7869	7.72863	7.75745					-21.2116	Indeterminate			-21.2113	Indeterminate
31	p.Leu31Cys			10884	2718	2.90003	2.67947					-39.3467	Indeterminate			-33.1988	Indeterminate
31	p.Leu31Trp			13277	2652	3.53765	2.6144					-18.5468	Indeterminate			-18.5468	Indeterminate
31	p.Leu31Phe			14121	2017	3.76253	1.98841					-5.12571	Neutral			-5.12571	Neutral
32	p.Leu32Asn			2757	2086	5.77467	6.41668	1361	1177	5.79815	7.89403	-24.9218	Indeterminate	-29.7941	Indeterminate	-53.1508	Deleterious
32	p.Leu32Lys			4132	3792	8.65467	11.6645	1940	1823	8.26481	12.2267	-29.0409	Indeterminate	-27.2643	Indeterminate	-53.1508	Deleterious
32	p.Leu32Thr			1677	990	3.51256	3.04531	942	231	4.01312	1.5493	-19.793	Indeterminate	-0.0376488	Neutral	-15.9483	Indeterminate
32	p.Leu32Arg			1964	1636	4.11369	5.03245	944	914	4.02164	6.13011	-41.6585	Indeterminate	-51.415	Indeterminate	-53.1508	Deleterious
32	p.Leu32Ser			2088	1649	4.37342	5.07244	1437	721	6.12193	4.83568	-35.0786	Indeterminate	-4.41231	Neutral	-32.5341	Indeterminate
32	p.Leu32Ile			2006	586	4.20166	1.80258	1122	207	4.77996	1.38833	-0.447292	Neutral	-0.000101371	Neutral	-0.057706	Neutral
32	p.Leu32Met			3442	1252	7.20943	3.85124	1437	260	6.12193	1.7438	-0.6293	Neutral	-1.10871e-05	Neutral	-0.107049	Neutral
32	p.Leu32His			1717	1516	3.59634	4.66332	795	651	3.38687	4.3662	-52	Indeterminate	-40.1553	Indeterminate	-53.1508	Deleterious
32	p.Leu32Gln			2563	1371	5.36833	4.21729	1457	756	6.20713	5.07042	-9.0475	Indeterminate	-5.04547	Neutral	-10.6642	Indeterminate
32	p.Leu32Pro	Pathogenic		4912	4768	10.2884	14.6667	1841	2065	7.84305	13.8498	-28.9444	Indeterminate	-43.5571	Indeterminate	-53.1508	Deleterious
32	p.Leu32Leu	Synonymous		1981	642	4.1493	1.97484	851	281	3.62544	1.88464	-1.06151	Neutral	-1.06151	Neutral	-0.81759	Neutral
32	p.Leu32Asp			2011	1682	4.21214	5.17395	723	788	3.08013	5.28504	-41.3022	Indeterminate	-53.1508	Deleterious	-53.1508	Deleterious
32	p.Leu32Glu			2518	2363	5.27407	7.26876	1148	1069	4.89073	7.16968	-45.2384	Indeterminate	-40.7604	Indeterminate	-53.1508	Deleterious
32	p.Leu32Ala			876	322	1.83482	0.990495	256	98	1.09061	0.657277	-8.43099	Indeterminate	-14.242	Indeterminate	-18.6099	Indeterminate
32	p.Leu32Gly			1595	1406	3.3408	4.32496	878	716	3.74047	4.80215	-53.1508	Deleterious	-36.8285	Indeterminate	-53.1508	Deleterious
32	p.Leu32Val			3564	1243	7.46497	3.82356	1582	300	6.73966	2.01207	-0.39565	Neutral	-1.55661e-05	Neutral	-0.0460121	Neutral
32	p.Leu32Tyr			1947	1414	4.07808	4.34956	1105	911	4.70754	6.10999	-30.2303	Indeterminate	-31.4324	Indeterminate	-53.1508	Deleterious
32	p.Leu32Cys			1419	550	2.97216	1.69184	793	133	3.37835	0.892019	-5.42882	Neutral	-0.000152917	Neutral	-3.17708	Neutral
32	p.Leu32Trp			2952	2525	6.18311	7.76708	1653	1521	7.04213	10.2012	-32.2035	Indeterminate	-29.6051	Indeterminate	-53.1508	Deleterious
32	p.Leu32Phe			1622	716	3.39736	2.20247	1208	288	5.14634	1.93159	-7.75703	Indeterminate	-0.00735581	Neutral	-5.09041	Neutral
33	p.Glu33Asn			2405	1987	6.28873	6.032					-0.119444	Neutral			-0.119444	Neutral
33	p.Glu33Lys			2310	2125	6.04032	6.45093					-0.409975	Neutral			-0.409975	Neutral
33	p.Glu33Thr			2551	2244	6.6705	6.81218					-0.191789	Neutral			-0.191789	Neutral
33	p.Glu33Arg			323	265	0.844599	0.804469					-9.23679	Indeterminate			-9.23679	Indeterminate
33	p.Glu33Ser			894	826	2.33768	2.50751					-3.58502	Neutral			-3.58502	Neutral
33	p.Glu33Ile			3960	3269	10.3548	9.9238					-0.0131041	Neutral			-0.0131041	Neutral
33	p.Glu33Met			4009	3279	10.483	9.95416					-0.0106857	Neutral			-0.0106857	Neutral
33	p.Glu33His			2694	2397	7.04443	7.27665					-0.178646	Neutral			-0.178646	Neutral
33	p.Glu33Gln			3450	3143	9.02126	9.5413					-0.0922979	Neutral			-0.0922979	Neutral
33	p.Glu33Pro			2489	1886	6.50838	5.72539					-0.0351097	Neutral			-0.0351097	Neutral
33	p.Glu33Leu			2006	1914	5.2454	5.81039					-0.822413	Neutral			-0.822413	Neutral
33	p.Glu33Asp			1895	1477	4.95516	4.48377					-0.150919	Neutral			-0.150919	Neutral
33	p.Glu33Glu	Synonymous		1646	1522	4.30406	4.62038					-1.06151	Neutral			-1.06151	Neutral
33	p.Glu33Ala			425	405	1.11131	1.22947					-11.393	Indeterminate			-11.393	Indeterminate
33	p.Glu33Gly			2167	1901	5.6664	5.77092					-0.321211	Neutral			-0.321211	Neutral
33	p.Glu33Val			1148	984	3.00186	2.98716					-1.43684	Neutral			-1.43684	Neutral
33	p.Glu33Tyr			374	322	0.977957	0.977505					-9.22089	Indeterminate			-9.22089	Indeterminate
33	p.Glu33Cys			784	708	2.05005	2.1493					-3.97418	Neutral			-3.97418	Neutral
33	p.Glu33Trp			1942	1609	5.07805	4.88449					-0.262531	Neutral			-0.262531	Neutral
33	p.Glu33Phe			771	678	2.01606	2.05823					-3.57999	Neutral			-3.57999	Neutral
34	p.Ala34Asn			1048	380	2.48135	2.46946	974	864	2.38573	3.01486	-5.06094	Neutral	-9.96399	Indeterminate	-11.5121	Indeterminate
34	p.Ala34Lys			1978	717	4.68332	4.65947	1977	1399	4.8425	4.88171	-1.62642	Neutral	-0.922047	Neutral	-1.08043	Neutral
34	p.Ala34Thr			1206	360	2.85545	2.33949	1040	862	2.5474	3.00789	-1.33596	Neutral	-7.07015	Indeterminate	-5.63493	Neutral
34	p.Ala34Arg			4462	1497	10.5647	9.72836	4243	2972	10.3929	10.3706	-0.0688738	Neutral	-0.0702894	Neutral	-0.00630926	Neutral
34	p.Ala34Ser			1003	246	2.37481	1.59865	903	642	2.21183	2.24021	-0.470278	Neutral	-4.43903	Neutral	-2.77086	Neutral
34	p.Ala34Ile			1160	348	2.74654	2.2615	1259	760	3.08382	2.65196	-1.50494	Neutral	-0.861088	Neutral	-0.96549	Neutral
34	p.Ala34Met			2790	1090	6.6059	7.08344	2925	1910	7.16455	6.66481	-1.25276	Neutral	-0.132075	Neutral	-0.414061	Neutral
34	p.Ala34His			1987	510	4.70463	3.31427	1486	902	3.63984	3.14746	-0.0695609	Neutral	-0.580108	Neutral	-0.113301	Neutral
34	p.Ala34Gln			2756	1108	6.52539	7.20042	2539	2187	6.21908	7.63138	-1.55869	Neutral	-1.97798	Neutral	-1.74948	Neutral
34	p.Ala34Pro			1736	907	4.11034	5.8942	1555	1319	3.80885	4.60255	-11.0809	Indeterminate	-4.35683	Neutral	-11.8892	Indeterminate
34	p.Ala34Leu			2439	838	5.77483	5.4458	2468	1808	6.04517	6.30888	-0.670119	Neutral	-0.681247	Neutral	-0.397769	Neutral
34	p.Ala34Asp			2130	868	5.04321	5.64076	2207	1477	5.40587	5.15388	-2.80831	Neutral	-0.433238	Neutral	-1.5425	Neutral
34	p.Ala34Glu			2272	972	5.37942	6.31661	2212	1619	5.41812	5.64938	-3.24604	Neutral	-0.897762	Neutral	-2.19063	Neutral
34	p.Ala34Ala	Synonymous		2329	837	5.51438	5.4393	2131	1576	5.21971	5.49934	-1.06151	Neutral	-1.06151	Neutral	-0.81759	Neutral
34	p.Ala34Gly			1829	780	4.33053	5.06888	1820	1092	4.45794	3.81045	-4.55949	Neutral	-0.283938	Neutral	-2.72003	Neutral
34	p.Ala34Val			1093	525	2.5879	3.41175	1289	878	3.1573	3.06372	-13.9947	Indeterminate	-1.86515	Neutral	-12.2757	Indeterminate
34	p.Ala34Tyr			2781	751	6.58459	4.88043	2256	1675	5.52589	5.84479	-0.0313512	Neutral	-0.951337	Neutral	-0.233242	Neutral
34	p.Ala34Cys			2203	772	5.21605	5.0169	2252	1303	5.51609	4.54672	-1.01084	Neutral	-0.088865	Neutral	-0.282281	Neutral
34	p.Ala34Trp			1513	537	3.58234	3.48973	1712	1111	4.19341	3.87675	-2.44936	Neutral	-0.682556	Neutral	-1.46703	Neutral
34	p.Ala34Phe			3520	1345	8.33432	8.74058	3578	2302	8.76402	8.03266	-0.589711	Neutral	-0.0489906	Neutral	-0.109916	Neutral
35	p.Gly35Asn			1949	799	3.49553	1.7771	10005	6273	4.43125	2.60717	-8.72779	Indeterminate	-1.64943	Neutral	-7.34284	Indeterminate
35	p.Gly35Lys			2552	1260	4.577	2.80243	10948	8539	4.8489	3.54896	-12.3113	Indeterminate	-4.60366	Neutral	-13.2454	Indeterminate
35	p.Gly35Thr			2584	1647	4.6344	3.66317	10143	10610	4.49237	4.4097	-25.9747	Indeterminate	-15.4452	Indeterminate	-53.1508	Deleterious
35	p.Gly35Arg		Neutral	2733	924	4.90163	2.05511	11916	8419	5.27763	3.49908	-2.05972	Neutral	-2.38988	Neutral	-2.41954	Neutral
35	p.Gly35Ser			2126	992	3.81297	2.20636	8773	6513	3.88559	2.70692	-12.4838	Indeterminate	-5.14277	Neutral	-13.9022	Indeterminate
35	p.Gly35Ile			2090	4458	3.74841	9.91526	9346	19604	4.13937	8.14776	-53.1508	Deleterious	-53.1508	Deleterious	-53.1508	Deleterious
35	p.Gly35Met			3439	1998	6.16784	4.44385	12679	12683	5.61557	5.27127	-15.1471	Indeterminate	-10.3911	Indeterminate	-21.3131	Indeterminate
35	p.Gly35His			2988	1047	5.35897	2.32868	11525	8225	5.10446	3.41845	-2.1364	Neutral	-2.69115	Neutral	-2.70779	Neutral
35	p.Gly35Gln			4241	1991	7.60622	4.42828	14962	14359	6.62672	5.96785	-5.27711	Neutral	-7.21175	Indeterminate	-9.21734	Indeterminate
35	p.Gly35Pro			2624	9100	4.70614	20.2398	10587	31189	4.68902	12.9627	-53.1508	Deleterious	-53.1508	Deleterious	-53.1508	Deleterious
35	p.Gly35Leu			3145	2964	5.64055	6.59238	12395	15692	5.48978	6.52187	-53.1508	Deleterious	-22.2598	Indeterminate	-53.1508	Deleterious
35	p.Gly35Asp			2568	1419	4.6057	3.15607	10551	7765	4.67307	3.22727	-17.4911	Indeterminate	-3.68981	Neutral	-17.2099	Indeterminate
35	p.Gly35Glu		Neutral	2733	1146	4.90163	2.54888	10753	9407	4.76254	3.90971	-6.09192	Indeterminate	-7.71979	Indeterminate	-10.4093	Indeterminate
35	p.Gly35Ala			2285	903	4.09814	2.00841	9298	6841	4.11811	2.84324	-6.09646	Indeterminate	-4.51608	Neutral	-7.54972	Indeterminate
35	p.Gly35Gly	Synonymous		1358	329	2.43557	0.731745	5570	2694	2.46697	1.11967	-1.06151	Neutral	-1.06151	Neutral	-0.81759	Neutral
35	p.Gly35Val		Deleterious	3854	5902	6.91214	13.1269	15424	25699	6.83134	10.6809	-53.1508	Deleterious	-37.261	Indeterminate	-53.1508	Deleterious
35	p.Gly35Tyr			2312	1427	4.14656	3.17386	10542	8067	4.66908	3.35278	-26.3035	Indeterminate	-4.46506	Neutral	-26.2764	Indeterminate
35	p.Gly35Cys			3042	1561	5.45582	3.4719	11585	9259	5.13103	3.8482	-11.5099	Indeterminate	-4.72531	Neutral	-12.6201	Indeterminate
35	p.Gly35Trp		Deleterious	4083	3648	7.32285	8.1137	15410	18194	6.82514	7.56174	-40.9625	Indeterminate	-14.6008	Indeterminate	-53.1508	Deleterious
35	p.Gly35Phe			3051	1446	5.47196	3.21612	13371	10574	5.92206	4.39474	-8.60383	Indeterminate	-3.56658	Neutral	-8.93226	Indeterminate
36	p.Ala36Asn			5581	3345	5.14278	6.07872					-21.2863	Indeterminate			-21.286	Indeterminate
36	p.Ala36Lys			8028	18657	7.39765	33.9046					-53.1508	Deleterious			-53.1508	Deleterious
36	p.Ala36Thr			2783	1191	2.56448	2.16435					-15.5652	Indeterminate			-15.5652	Indeterminate
36	p.Ala36Arg			4397	1199	4.05175	2.17889					-0.86456	Neutral			-0.86456	Neutral
36	p.Ala36Ser			4348	1450	4.0066	2.63502					-3.1573	Neutral			-3.1573	Neutral
36	p.Ala36Ile			5237	1240	4.82579	2.2534					-0.136039	Neutral			-0.136039	Neutral
36	p.Ala36Met			6481	232	5.97212	0.421604					0	Neutral			0	Neutral
36	p.Ala36His			5535	1160	5.1004	2.10802					-0.0227777	Neutral			-0.0227777	Neutral
36	p.Ala36Gln			5409	1222	4.98429	2.22069					-0.0688498	Neutral			-0.0688498	Neutral
36	p.Ala36Pro			8410	9367	7.74965	17.0222					-53.1508	Deleterious			-53.1508	Deleterious
36	p.Ala36Leu			6369	2754	5.86891	5.00472					-5.93515	Indeterminate			-5.93515	Indeterminate
36	p.Ala36Asp			3629	1165	3.34405	2.1171					-3.53591	Neutral			-3.53591	Neutral
36	p.Ala36Glu			7209	3345	6.64295	6.07872					-6.7161	Indeterminate			-6.7161	Indeterminate
36	p.Ala36Ala	Synonymous		4309	1200	3.97066	2.18071					-1.06151	Neutral			-1.06151	Neutral
36	p.Ala36Gly			2425	903	2.23459	1.64098					-11.4589	Indeterminate			-11.4589	Indeterminate
36	p.Ala36Val			5770	1324	5.31694	2.40605					-0.0639582	Neutral			-0.0639582	Neutral
36	p.Ala36Tyr			4470	1637	4.11902	2.97485					-4.78252	Neutral			-4.78252	Neutral
36	p.Ala36Cys			4719	296	4.34847	0.537908					-1.04111e-14	Neutral			0	Neutral
36	p.Ala36Trp			7861	1433	7.24376	2.60413					-0.000283131	Neutral			-0.000283131	Neutral
36	p.Ala36Phe			5551	1908	5.11514	3.46733					-2.38873	Neutral			-2.38873	Neutral
37	p.Leu37Asn			15659	807	7.21274	4.34245					-0.0747782	Neutral			-0.0747782	Neutral
37	p.Leu37Lys			9469	805	4.36154	4.33168					-8.19626	Indeterminate			-8.19626	Indeterminate
37	p.Leu37Thr			7000	646	3.22429	3.47611					-15.4269	Indeterminate			-15.4269	Indeterminate
37	p.Leu37Arg			10261	287	4.72635	1.54434					-2.02139e-05	Neutral			-2.02138e-05	Neutral
37	p.Leu37Ser			7945	512	3.65957	2.75506					-3.05179	Neutral			-3.05179	Neutral
37	p.Leu37Ile			13094	1494	6.03127	8.03917					-15.631	Indeterminate			-15.631	Indeterminate
37	p.Leu37Met			11651	487	5.3666	2.62053					-0.0165841	Neutral			-0.0165841	Neutral
37	p.Leu37His			11818	1084	5.44352	5.83297					-8.27189	Indeterminate			-8.27189	Indeterminate
37	p.Leu37Gln			17769	1937	8.18463	10.4229					-9.51412	Indeterminate			-9.51412	Indeterminate
37	p.Leu37Pro			9322	1163	4.29383	6.25807					-27.6993	Indeterminate			-27.6682	Indeterminate
37	p.Leu37Leu	Synonymous		14149	931	6.51721	5.00969					-1.06151	Neutral			-1.06151	Neutral
37	p.Leu37Asp			10884	742	5.01331	3.99268					-2.3372	Neutral			-2.3372	Neutral
37	p.Leu37Glu			9551	634	4.39931	3.41154					-2.5701	Neutral			-2.5701	Neutral
37	p.Leu37Ala			11018	534	5.07503	2.87344					-0.142759	Neutral			-0.142759	Neutral
37	p.Leu37Gly			9306	588	4.28646	3.16401					-2.02986	Neutral			-2.02986	Neutral
37	p.Leu37Val			13136	1307	6.05061	7.03293					-9.83248	Indeterminate			-9.83247	Indeterminate
37	p.Leu37Tyr			8482	697	3.90692	3.75054					-8.27794	Indeterminate			-8.27794	Indeterminate
37	p.Leu37Cys			9322	518	4.29383	2.78734					-0.847029	Neutral			-0.847029	Neutral
37	p.Leu37Trp			6345	2856	2.92259	15.3681					-53.1508	Deleterious			-53.1508	Deleterious
37	p.Leu37Phe			10921	555	5.03035	2.98644					-0.243206	Neutral			-0.243206	Neutral
38	p.Pro38Asn			7663	2366	4.62011	2.90553					-53.1508	Deleterious			-53.1508	Deleterious
38	p.Pro38Lys			6677	2439	4.02564	2.99517					-53.1508	Deleterious			-53.1508	Deleterious
38	p.Pro38Thr			6647	881	4.00755	1.0819					-6.11512	Indeterminate			-6.11512	Indeterminate
38	p.Pro38Arg			6252	3126	3.7694	3.83883					-53.1508	Deleterious			-53.1508	Deleterious
38	p.Pro38Ser			6013	1033	3.6253	1.26856					-17.3322	Indeterminate			-17.3321	Indeterminate
38	p.Pro38Ile			6138	1077	3.70067	1.32259					-18.089	Indeterminate			-18.0889	Indeterminate
38	p.Pro38Met			8518	1945	5.13559	2.38853					-27.7346	Indeterminate			-27.7027	Indeterminate
38	p.Pro38His			5342	2012	3.22075	2.4708					-53.1508	Deleterious			-53.1508	Deleterious
38	p.Pro38Gln			17977	7277	10.8385	8.9364					-53.1508	Deleterious			-53.1508	Deleterious
38	p.Pro38Pro	Synonymous		7226	717	4.35663	0.8805					-1.06151	Neutral			-1.06151	Neutral
38	p.Pro38Leu			10269	3279	6.19129	4.02672					-53	Indeterminate			-33.2193	Indeterminate
38	p.Pro38Asp			7287	14782	4.39341	18.1528					-53.1508	Deleterious			-53.1508	Deleterious
38	p.Pro38Glu			14248	3748	8.59027	4.60267					-25.6895	Indeterminate			-25.6817	Indeterminate
38	p.Pro38Ala			6236	3456	3.75975	4.24408					-53.1508	Deleterious			-53.1508	Deleterious
38	p.Pro38Gly			8191	804	4.93844	0.987339					-0.71356	Neutral			-0.71356	Neutral
38	p.Pro38Val			10026	1016	6.04478	1.24768					-0.533644	Neutral			-0.533644	Neutral
38	p.Pro38Tyr			4282	1445	2.58166	1.77451					-53.1508	Deleterious			-53.1508	Deleterious
38	p.Pro38Cys			8165	611	4.92277	0.750328					-0.0422128	Neutral			-0.0422128	Neutral
38	p.Pro38Trp			7975	24617	4.80821	30.2305					-53.1508	Deleterious			-53.1508	Deleterious
38	p.Pro38Phe			10730	4800	6.46923	5.89456					-53.1508	Deleterious			-53.1508	Deleterious
39	p.Asn39Asn	Synonymous		11025	1321	4.88482	1.95131					-1.06151	Neutral			-1.06151	Neutral
39	p.Asn39Lys			12759	3256	5.6531	4.8096					-22.9411	Indeterminate			-22.9399	Indeterminate
39	p.Asn39Thr			9531	725	4.22288	1.07093					-0.0128986	Neutral			-0.0128986	Neutral
39	p.Asn39Arg			7919	1061	3.50866	1.56725					-3.95388	Neutral			-3.95388	Neutral
39	p.Asn39Ser			8858	1238	3.9247	1.82871					-4.05184	Neutral			-4.05184	Neutral
39	p.Asn39Ile			10639	1845	4.7138	2.72534					-7.94561	Indeterminate			-7.94561	Indeterminate
39	p.Asn39Met			12667	3339	5.61234	4.9322					-25.2049	Indeterminate			-25.1993	Indeterminate
39	p.Asn39His			11236	950	4.97831	1.40329					-0.0271885	Neutral			-0.0271885	Neutral
39	p.Asn39Gln			8347	932	3.69829	1.3767					-1.23834	Neutral			-1.23834	Neutral
39	p.Asn39Pro			9695	16800	4.29554	24.8161					-53.1508	Deleterious			-53.1508	Deleterious
39	p.Asn39Leu			13886	6932	6.15244	10.2396					-53.1508	Deleterious			-53.1508	Deleterious
39	p.Asn39Asp			15016	1873	6.65311	2.7667					-0.65875	Neutral			-0.65875	Neutral
39	p.Asn39Glu			15471	2195	6.8547	3.24234					-1.56112	Neutral			-1.56112	Neutral
39	p.Asn39Ala			8785	1365	3.89235	2.01631					-6.59708	Indeterminate			-6.59708	Indeterminate
39	p.Asn39Gly			15618	1831	6.91984	2.70466					-0.341691	Neutral			-0.341691	Neutral
39	p.Asn39Val			12208	1947	5.40897	2.87601					-4.57524	Neutral			-4.57524	Neutral
39	p.Asn39Tyr			8959	952	3.96945	1.40625					-0.720898	Neutral			-0.720898	Neutral
39	p.Asn39Cys			13589	7404	6.02085	10.9368					-53.1508	Deleterious			-53.1508	Deleterious
39	p.Asn39Trp			9837	1931	4.35846	2.85237					-13.5574	Indeterminate			-13.5574	Indeterminate
39	p.Asn39Phe			9654	9801	4.27738	14.4775					-53.1508	Deleterious			-53.1508	Deleterious
40	p.Ala40Asn			17799	1463	5.86924	4.97839					-6.01585	Indeterminate			-6.01585	Indeterminate
40	p.Ala40Lys			21626	1443	7.1312	4.91033					-1.40266	Neutral			-1.40266	Neutral
40	p.Ala40Thr			19138	8921	6.31078	30.357					-53.1508	Deleterious			-53.1508	Deleterious
40	p.Ala40Arg			12717	763	4.19345	2.59639					-2.17568	Neutral			-2.17568	Neutral
40	p.Ala40Ser			7528	329	2.48237	1.11954					-0.833724	Neutral			-0.833724	Neutral
40	p.Ala40Ile			9646	648	3.18078	2.20506					-6.05892	Indeterminate			-6.05892	Indeterminate
40	p.Ala40Met			12826	464	4.22939	1.57893					-0.0144484	Neutral			-0.0144484	Neutral
40	p.Ala40His			10373	460	3.42051	1.56532					-0.385707	Neutral			-0.385707	Neutral
40	p.Ala40Gln			12433	454	4.0998	1.5449					-0.0193253	Neutral			-0.0193253	Neutral
40	p.Ala40Pro			13362	1203	4.40613	4.09365					-12.196	Indeterminate			-12.196	Indeterminate
40	p.Ala40Leu			14549	3440	4.79755	11.7059					-53.1508	Deleterious			-53.1508	Deleterious
40	p.Ala40Asp			12913	1289	4.25808	4.38629					-17.5582	Indeterminate			-17.5582	Indeterminate
40	p.Ala40Glu			22310	1055	7.35675	3.59002					-0.0470766	Neutral			-0.0470766	Neutral
40	p.Ala40Ala	Synonymous		17869	1075	5.89232	3.65808					-1.06151	Neutral			-1.06151	Neutral
40	p.Ala40Gly			20764	1292	6.84695	4.3965					-0.943353	Neutral			-0.943353	Neutral
40	p.Ala40Val			17468	1452	5.76009	4.94096					-6.4761	Indeterminate			-6.4761	Indeterminate
40	p.Ala40Tyr			14320	633	4.72204	2.15401					-0.124801	Neutral			-0.124801	Neutral
40	p.Ala40Cys			15434	936	5.08938	3.18508					-1.56309	Neutral			-1.56309	Neutral
40	p.Ala40Trp			12309	863	4.05891	2.93667					-5.12463	Neutral			-5.12463	Neutral
40	p.Ala40Phe			17875	1204	5.8943	4.09705					-2.20947	Neutral			-2.20947	Neutral
41	p.Pro41Asn			3018	760	4.29089	3.15851					-0.389127	Neutral			-0.389127	Neutral
41	p.Pro41Lys			2802	980	3.98379	4.07281					-4.11327	Neutral			-4.11327	Neutral
41	p.Pro41Thr			2775	782	3.9454	3.24994					-1.19675	Neutral			-1.19675	Neutral
41	p.Pro41Arg			2832	1777	4.02644	7.38509					-30.0804	Indeterminate			-29.9252	Indeterminate
41	p.Pro41Ser			4466	1181	6.34961	4.90815					-0.173796	Neutral			-0.173796	Neutral
41	p.Pro41Ile			2598	1141	3.69375	4.74192					-11.503	Indeterminate			-11.503	Indeterminate
41	p.Pro41Met			4122	874	5.86052	3.63228					-0.0143529	Neutral			-0.0143529	Neutral
41	p.Pro41His			2358	1155	3.35253	4.8001					-18.0679	Indeterminate			-18.0678	Indeterminate
41	p.Pro41Gln		Neutral	3840	1354	5.45959	5.62713					-2.48365	Neutral			-2.48365	Neutral
41	p.Pro41Pro	Synonymous		2669	730	3.7947	3.03383					-1.06151	Neutral			-1.06151	Neutral
41	p.Pro41Leu			3638	786	5.17239	3.26656					-0.0340505	Neutral			-0.0340505	Neutral
41	p.Pro41Asp			3619	1263	5.14538	5.24894					-2.61791	Neutral			-2.61791	Neutral
41	p.Pro41Glu			3875	956	5.50935	3.97307					-0.136165	Neutral			-0.136165	Neutral
41	p.Pro41Ala			4397	1208	6.25151	5.02036					-0.271458	Neutral			-0.271458	Neutral
41	p.Pro41Gly			2512	730	3.57148	3.03383					-1.82065	Neutral			-1.82065	Neutral
41	p.Pro41Val			5452	1628	7.75148	6.76585					-0.304874	Neutral			-0.304874	Neutral
41	p.Pro41Tyr			4042	2317	5.74678	9.62929					-16.9284	Indeterminate			-16.9284	Indeterminate
41	p.Pro41Cys			3683	1331	5.23637	5.53154					-3.06605	Neutral			-3.06605	Neutral
41	p.Pro41Trp			2884	1129	4.10038	4.69205					-6.52993	Indeterminate			-6.52993	Indeterminate
41	p.Pro41Phe			4753	1980	6.75766	8.22874					-4.1009	Neutral			-4.1009	Neutral
42	p.Asn42Asn	Synonymous		8645	341	4.2964	0.553221					-1.06151	Neutral			-1.06151	Neutral
42	p.Asn42Lys			9397	4647	4.67013	7.53906					-53.1508	Deleterious			-53.1508	Deleterious
42	p.Asn42Thr			10798	564	5.3664	0.915005					-3.67704	Neutral			-3.67704	Neutral
42	p.Asn42Arg			13173	6054	6.54673	9.8217					-53.1508	Deleterious			-53.1508	Deleterious
42	p.Asn42Ser			9213	444	4.57868	0.720323					-3.18954	Neutral			-3.18954	Neutral
42	p.Asn42Ile			10911	4981	5.42256	8.08092					-53.1508	Deleterious			-53.1508	Deleterious
42	p.Asn42Met			8586	3308	4.26708	5.36673					-53.1508	Deleterious			-53.1508	Deleterious
42	p.Asn42His			9638	2787	4.7899	4.52149					-53.1508	Deleterious			-53.1508	Deleterious
42	p.Asn42Gln			10388	2910	5.16264	4.72104					-53.1508	Deleterious			-53.1508	Deleterious
42	p.Asn42Pro			6267	2676	3.11458	4.34141					-53.1508	Deleterious			-53.1508	Deleterious
42	p.Asn42Leu			9292	4188	4.61795	6.7944					-53.1508	Deleterious			-53.1508	Deleterious
42	p.Asn42Asp			9064	576	4.50463	0.934473					-10.6768	Indeterminate			-10.6768	Indeterminate
42	p.Asn42Glu			12901	6353	6.41155	10.3068					-53.1508	Deleterious			-53.1508	Deleterious
42	p.Asn42Ala			7254	328	3.6051	0.532131					-3.45819	Neutral			-3.45819	Neutral
42	p.Asn42Gly			12142	451	6.03434	0.73168					-0.241832	Neutral			-0.241832	Neutral
42	p.Asn42Val			13261	5223	6.59046	8.47353					-53.1508	Deleterious			-53.1508	Deleterious
42	p.Asn42Tyr			9832	4604	4.88632	7.4693					-53.1508	Deleterious			-53.1508	Deleterious
42	p.Asn42Cys			10625	622	5.28042	1.0091					-6.35506	Indeterminate			-6.35506	Indeterminate
42	p.Asn42Trp			8933	5163	4.43953	8.37619					-53.1508	Deleterious			-53.1508	Deleterious
42	p.Asn42Phe			10895	5419	5.41461	8.79151					-53.1508	Deleterious			-53.1508	Deleterious
43	p.Ser43Asn			8865	6639	3.68811	3.90739					-3.01933	Neutral			-3.01933	Neutral
43	p.Ser43Lys			16747	11835	6.96726	6.96549					-0.477972	Neutral			-0.477972	Neutral
43	p.Ser43Thr			14488	9553	6.02745	5.62242					-0.395532	Neutral			-0.395532	Neutral
43	p.Ser43Arg			16871	11411	7.01885	6.71595					-0.312734	Neutral			-0.312734	Neutral
43	p.Ser43Ser	Synonymous		11014	7488	4.58216	4.40706					-1.06151	Neutral			-1.06151	Neutral
43	p.Ser43Ile			7943	6763	3.30453	3.98037					-6.5502	Indeterminate			-6.5502	Indeterminate
43	p.Ser43Met			15797	11730	6.57203	6.9037					-0.839868	Neutral			-0.839868	Neutral
43	p.Ser43His			16521	11177	6.87324	6.57823					-0.334929	Neutral			-0.334929	Neutral
43	p.Ser43Gln			17314	11767	7.20315	6.92547					-0.301494	Neutral			-0.301494	Neutral
43	p.Ser43Pro			12527	8469	5.21161	4.98443					-0.737145	Neutral			-0.737145	Neutral
43	p.Ser43Leu			10449	7515	4.3471	4.42296					-1.74276	Neutral			-1.74276	Neutral
43	p.Ser43Asp			11537	8545	4.79974	5.02916					-1.70477	Neutral			-1.70477	Neutral
43	p.Ser43Glu			14597	10128	6.0728	5.96084					-0.602974	Neutral			-0.602974	Neutral
43	p.Ser43Ala			11830	7793	4.92164	4.58657					-0.697623	Neutral			-0.697623	Neutral
43	p.Ser43Gly			4691	3009	1.9516	1.77095					-4.02498	Neutral			-4.02498	Neutral
43	p.Ser43Val			11779	8766	4.90042	5.15923					-1.68207	Neutral			-1.68207	Neutral
43	p.Ser43Tyr			9565	6955	3.97933	4.09337					-2.22471	Neutral			-2.22471	Neutral
43	p.Ser43Cys			5091	3662	2.11801	2.15527					-5.99684	Indeterminate			-5.99684	Indeterminate
43	p.Ser43Trp			10965	8262	4.56177	4.8626					-2.10043	Neutral			-2.10043	Neutral
43	p.Ser43Phe			11776	8442	4.89918	4.96854					-1.31664	Neutral			-1.31664	Neutral
44	p.Tyr44Asn			7443	4844	6.00896	6.01881					-3.68512	Neutral			-3.68512	Neutral
44	p.Tyr44Lys			4300	2790	3.47152	3.46666					-8.10072	Indeterminate			-8.10072	Indeterminate
44	p.Tyr44Thr			7466	3963	6.02753	4.92414					-1.081	Neutral			-1.081	Neutral
44	p.Tyr44Arg			4924	2723	3.9753	3.38341					-3.23233	Neutral			-3.23233	Neutral
44	p.Tyr44Ser			6073	3554	4.90292	4.41595					-3.01764	Neutral			-3.01764	Neutral
44	p.Tyr44Ile			5380	3030	4.34344	3.76486					-3.04811	Neutral			-3.04811	Neutral
44	p.Tyr44Met			5878	3444	4.74549	4.27927					-3.21544	Neutral			-3.21544	Neutral
44	p.Tyr44His			8889	5272	7.17636	6.55061					-1.55175	Neutral			-1.55175	Neutral
44	p.Tyr44Gln			2488	1711	2.00864	2.12597					-18.2053	Indeterminate			-18.2052	Indeterminate
44	p.Tyr44Pro			6918	8564	5.58511	10.641					-35.1953	Indeterminate			-32.8925	Indeterminate
44	p.Tyr44Leu			6515	3822	5.25976	4.74895					-2.69461	Neutral			-2.69461	Neutral
44	p.Tyr44Asp			5508	3671	4.44678	4.56133					-6.48428	Indeterminate			-6.48428	Indeterminate
44	p.Tyr44Glu			4288	3217	3.46183	3.99722					-13.6081	Indeterminate			-13.6081	Indeterminate
44	p.Tyr44Ala			4861	4765	3.92443	5.92065					-26.3011	Indeterminate			-26.2892	Indeterminate
44	p.Tyr44Gly			4818	3568	3.88972	4.43334					-11.4418	Indeterminate			-11.4418	Indeterminate
44	p.Tyr44Val			11028	6477	8.90324	8.04786					-0.877384	Neutral			-0.877384	Neutral
44	p.Tyr44Tyr	Synonymous		7815	4201	6.30929	5.21987					-1.06151	Neutral			-1.06151	Neutral
44	p.Tyr44Cys			5174	2688	4.17713	3.33992					-2.08194	Neutral			-2.08194	Neutral
44	p.Tyr44Trp			7945	4712	6.41424	5.8548					-1.96037	Neutral			-1.96037	Neutral
44	p.Tyr44Phe			6154	3465	4.96831	4.30536					-2.37946	Neutral			-2.37946	Neutral
45	p.Gly45Asn			9066	190	4.24559	1.00237	4002	2167	4.05057	3.80082	-0.0361987	Neutral	-3.50506	Neutral	-1.75274	Neutral
45	p.Gly45Lys			10852	426	5.08198	2.24743	4963	2650	5.02323	4.64798	-4.19299	Neutral	-2.19793	Neutral	-3.95	Neutral
45	p.Gly45Thr			8428	159	3.94682	0.838829	3637	1917	3.68114	3.36233	-0.0112261	Neutral	-3.59152	Neutral	-1.79653	Neutral
45	p.Gly45Arg			13226	375	6.19372	1.97837	5999	3130	6.0718	5.48988	-0.282298	Neutral	-1.27351	Neutral	-0.500332	Neutral
45	p.Gly45Ser			13865	787	6.49296	4.15194	6599	3360	6.67908	5.89329	-13.1022	Indeterminate	-0.849021	Neutral	-10.5357	Indeterminate
45	p.Gly45Ile			11823	669	5.53669	3.52941	6125	3452	6.19933	6.05465	-15.3758	Indeterminate	-2.00042	Neutral	-13.6709	Indeterminate
45	p.Gly45Met			11011	402	5.15644	2.12081	5143	2690	5.20541	4.71814	-2.82373	Neutral	-1.80666	Neutral	-2.55672	Neutral
45	p.Gly45His			9932	322	4.65114	1.69876	4752	2496	4.80967	4.37787	-1.72188	Neutral	-2.17227	Neutral	-2.00693	Neutral
45	p.Gly45Gln			10648	224	4.98644	1.18175	5023	2411	5.08396	4.22879	-0.0179677	Neutral	-1.07273	Neutral	-0.278391	Neutral
45	p.Gly45Pro			8515	12301	3.98756	64.8958	3482	7178	3.52426	12.5899	-53.1508	Deleterious	-53.1508	Deleterious	-53.1508	Deleterious
45	p.Gly45Leu			13995	472	6.55384	2.49011	6319	3279	6.39568	5.75122	-1.04208	Neutral	-1.0862	Neutral	-0.820725	Neutral
45	p.Gly45Asp			11282	237	5.28334	1.25033	5537	2729	5.60419	4.78654	-0.0132099	Neutral	-1.02812	Neutral	-0.257418	Neutral
45	p.Gly45Glu			10953	350	5.12927	1.84648	5234	2644	5.29752	4.63746	-1.2643	Neutral	-1.39048	Neutral	-1.14881	Neutral
45	p.Gly45Ala			8210	153	3.84473	0.807175	3412	1811	3.45341	3.17641	-0.0106266	Neutral	-4.12761	Neutral	-2.1865	Neutral
45	p.Gly45Gly	Synonymous		9184	270	4.30085	1.42443	4688	2196	4.74489	3.85169	-1.06151	Neutral	-1.06151	Neutral	-0.81759	Neutral
45	p.Gly45Val			8564	481	4.01051	2.53759	4028	2387	4.07688	4.18669	-20.691	Indeterminate	-5.32745	Neutral	-21.7677	Indeterminate
45	p.Gly45Tyr			8720	186	4.08356	0.981271	3827	2257	3.87344	3.95868	-0.054191	Neutral	-5.62149	Neutral	-3.3729	Neutral
45	p.Gly45Cys			11799	295	5.52545	1.55632	5280	2701	5.34408	4.73743	-0.110613	Neutral	-1.48259	Neutral	-0.519846	Neutral
45	p.Gly45Trp			9020	275	4.22405	1.4508	3974	2313	4.02223	4.0569	-1.42284	Neutral	-5.01373	Neutral	-3.98727	Neutral
45	p.Gly45Phe			14446	381	6.76504	2.01002	6777	3246	6.85924	5.69334	-0.0940979	Neutral	-0.479342	Neutral	-0.0906141	Neutral
46	p.Arg46Asn			12380	531	5.07914	1.56845					-0.709708	Neutral			-0.709708	Neutral
46	p.Arg46Lys			9730	361	3.99193	1.06631					-0.408231	Neutral			-0.408231	Neutral
46	p.Arg46Thr			16955	2071	6.95613	6.11726					-36.4181	Indeterminate			-33.0701	Indeterminate
46	p.Arg46Arg	Synonymous		13782	646	5.65434	1.90814					-1.06151	Neutral			-1.06151	Neutral
46	p.Arg46Ser			13112	523	5.37946	1.54482					-0.318541	Neutral			-0.318541	Neutral
46	p.Arg46Ile			17693	2934	7.2589	8.66637					-53.1508	Deleterious			-53.1508	Deleterious
46	p.Arg46Met			7746	476	3.17795	1.406					-10.7131	Indeterminate			-10.7131	Indeterminate
46	p.Arg46His			8963	333	3.67725	0.983607					-0.525373	Neutral			-0.525373	Neutral
46	p.Arg46Gln			9746	704	3.99849	2.07946					-14.279	Indeterminate			-14.279	Indeterminate
46	p.Arg46Pro			18485	15419	7.58384	45.5442					-53.1508	Deleterious			-53.1508	Deleterious
46	p.Arg46Leu			16241	1098	6.66319	3.24324					-5.97367	Indeterminate			-5.97367	Indeterminate
46	p.Arg46Asp			8698	2412	3.56853	7.1245					-53.1508	Deleterious			-53.1508	Deleterious
46	p.Arg46Glu			7379	1044	3.02738	3.08374					-53.1508	Deleterious			-53.1508	Deleterious
46	p.Arg46Ala			9496	620	3.89592	1.83134					-10.4493	Indeterminate			-10.4493	Indeterminate
46	p.Arg46Gly			12625	802	5.17966	2.36893					-6.53725	Indeterminate			-6.53725	Indeterminate
46	p.Arg46Val			8953	791	3.67315	2.33643					-27.6129	Indeterminate			-27.5836	Indeterminate
46	p.Arg46Tyr			14312	1176	5.87178	3.47364					-14.3368	Indeterminate			-14.3368	Indeterminate
46	p.Arg46Cys			14267	907	5.85332	2.67907					-5.5132	Neutral			-5.5132	Neutral
46	p.Arg46Trp			11216	426	4.60159	1.25831					-0.327487	Neutral			-0.327487	Neutral
46	p.Arg46Phe			11963	581	4.90806	1.71614					-1.84039	Neutral			-1.84039	Neutral
47	p.Arg47Asn			4828	1429	3.10123	2.33436					-2.19721	Neutral			-2.19721	Neutral
47	p.Arg47Lys			6158	1982	3.95555	3.23772					-2.23629	Neutral			-2.23629	Neutral
47	p.Arg47Thr			7976	2557	5.12333	4.17701					-1.26621	Neutral			-1.26621	Neutral
47	p.Arg47Arg	Synonymous		8947	2906	5.74705	4.74712					-1.06151	Neutral			-1.06151	Neutral
47	p.Arg47Ser			6416	2760	4.12127	4.50863					-8.25422	Indeterminate			-8.25422	Indeterminate
47	p.Arg47Ile			6040	2038	3.87975	3.32919					-3.0159	Neutral			-3.0159	Neutral
47	p.Arg47Met			8024	2754	5.15416	4.49882					-1.94259	Neutral			-1.94259	Neutral
47	p.Arg47His			7289	2516	4.68204	4.11004					-2.42369	Neutral			-2.42369	Neutral
47	p.Arg47Gln			7598	3704	4.88052	6.05071					-10.6452	Indeterminate			-10.6452	Indeterminate
47	p.Arg47Pro			8480	4396	5.44707	7.18113					-11.6142	Indeterminate			-11.6142	Indeterminate
47	p.Arg47Leu			8455	2369	5.43101	3.8699					-0.369775	Neutral			-0.369775	Neutral
47	p.Arg47Asp			6458	7409	4.14825	12.103					-53.1508	Deleterious			-53.1508	Deleterious
47	p.Arg47Glu			9515	3930	6.1119	6.41989					-3.92041	Neutral			-3.92041	Neutral
47	p.Arg47Ala			5555	1795	3.56822	2.93224					-2.77441	Neutral			-2.77441	Neutral
47	p.Arg47Gly			7345	3399	4.71801	5.55247					-9.18067	Indeterminate			-9.18067	Indeterminate
47	p.Arg47Val			7749	2449	4.97752	4.00059					-1.22589	Neutral			-1.22589	Neutral
47	p.Arg47Tyr			9908	3661	6.36434	5.98046					-1.98716	Neutral			-1.98716	Neutral
47	p.Arg47Cys			9687	2786	6.22238	4.5511					-0.30895	Neutral			-0.30895	Neutral
47	p.Arg47Trp			8071	3147	5.18435	5.14081					-3.86409	Neutral			-3.86409	Neutral
47	p.Arg47Phe			11181	3229	7.18204	5.27476					-0.199749	Neutral			-0.199749	Neutral
48	p.Pro48Asn			2904	1850	5.11115	6.04437					-53.1508	Deleterious			-53.1508	Deleterious
48	p.Pro48Lys			3193	2371	5.6198	7.74659					-53.1508	Deleterious			-53.1508	Deleterious
48	p.Pro48Thr	Pathogenic		2253	231	3.96536	0.754729					-19.3018	Indeterminate			-19.3017	Indeterminate
48	p.Pro48Arg			2576	1662	4.53385	5.43013					-53.1508	Deleterious			-53.1508	Deleterious
48	p.Pro48Ser			2673	193	4.70458	0.630575					-4.29865	Neutral			-4.29865	Neutral
48	p.Pro48Ile			3400	1282	5.98412	4.18858					-53.1508	Deleterious			-53.1508	Deleterious
48	p.Pro48Met			3721	2133	6.5491	6.96899					-53.1508	Deleterious			-53.1508	Deleterious
48	p.Pro48His			2798	1554	4.92458	5.07727					-53.1508	Deleterious			-53.1508	Deleterious
48	p.Pro48Gln			2850	2049	5.0161	6.69455					-53.1508	Deleterious			-53.1508	Deleterious
48	p.Pro48Pro	Synonymous		1620	78	2.85126	0.254844					-1.06151	Neutral			-1.06151	Neutral
48	p.Pro48Leu			4208	3546	7.40623	11.5856					-53.1508	Deleterious			-53.1508	Deleterious
48	p.Pro48Asp			3106	2678	5.46667	8.74963					-53.1508	Deleterious			-53.1508	Deleterious
48	p.Pro48Glu			2942	2356	5.17803	7.69759					-53.1508	Deleterious			-53.1508	Deleterious
48	p.Pro48Ala			1831	66	3.22263	0.215637					-0.0382204	Neutral			-0.0382204	Neutral
48	p.Pro48Gly			2682	268	4.72042	0.875617					-14.9859	Indeterminate			-14.9859	Indeterminate
48	p.Pro48Val			2679	279	4.71514	0.911556					-17.0479	Indeterminate			-17.0479	Indeterminate
48	p.Pro48Tyr			2687	2346	4.72922	7.66491					-53.1508	Deleterious			-53.1508	Deleterious
48	p.Pro48Cys			1917	219	3.37399	0.715523					-29.8882	Indeterminate			-29.7515	Indeterminate
48	p.Pro48Trp			3810	3295	6.70574	10.7655					-53.1508	Deleterious			-53.1508	Deleterious
48	p.Pro48Phe			2967	2151	5.22203	7.0278					-53.1508	Deleterious			-53.1508	Deleterious
49	p.Ile49Asn			2237	1425	4.04148	5.0389					-53.1508	Deleterious			-53.1508	Deleterious
49	p.Ile49Lys			2695	2221	4.86893	7.85361					-53.1508	Deleterious			-53.1508	Deleterious
49	p.Ile49Thr	Likely pathogenic		2164	487	3.9096	1.72207					-30.1091	Indeterminate			-29.951	Indeterminate
49	p.Ile49Arg			3841	2810	6.93935	9.93635					-53.1508	Deleterious			-53.1508	Deleterious
49	p.Ile49Ser	Likely pathogenic		3236	1418	5.84633	5.01414					-53.1508	Deleterious			-53.1508	Deleterious
49	p.Ile49Ile	Synonymous		1978	192	3.57356	0.678925					-1.06151	Neutral			-1.06151	Neutral
49	p.Ile49Met			2492	263	4.50218	0.929986					-1.1156	Neutral			-1.1156	Neutral
49	p.Ile49His			2474	1184	4.46966	4.1867					-53.1508	Deleterious			-53.1508	Deleterious
49	p.Ile49Gln			3367	1300	6.083	4.59689					-53.1508	Deleterious			-53.1508	Deleterious
49	p.Ile49Pro			3123	2176	5.64217	7.69448					-53.1508	Deleterious			-53.1508	Deleterious
49	p.Ile49Leu			2625	246	4.74246	0.869873					-0.36921	Neutral			-0.36921	Neutral
49	p.Ile49Asp			3604	3212	6.51117	11.3579					-53.1508	Deleterious			-53.1508	Deleterious
49	p.Ile49Glu			3855	3143	6.96464	11.1139					-53.1508	Deleterious			-53.1508	Deleterious
49	p.Ile49Ala			2079	459	3.75603	1.62306					-29.6693	Indeterminate			-29.5511	Indeterminate
49	p.Ile49Gly			3080	2656	5.56449	9.3918					-53.1508	Deleterious			-53.1508	Deleterious
49	p.Ile49Val			2891	306	5.22303	1.08204					-0.790357	Neutral			-0.790357	Neutral
49	p.Ile49Tyr			1968	1294	3.55549	4.57567					-53.1508	Deleterious			-53.1508	Deleterious
49	p.Ile49Cys			1784	321	3.22307	1.13508					-19.5896	Indeterminate			-19.5895	Indeterminate
49	p.Ile49Trp			3459	2624	6.24921	9.27864					-53.1508	Deleterious			-53.1508	Deleterious
49	p.Ile49Phe			2399	543	4.33416	1.92008					-28.004	Indeterminate			-27.9657	Indeterminate
50	p.Gln50Asn			6179	763	3.252	0.674314					-12.4887	Indeterminate			-12.4887	Indeterminate
50	p.Gln50Lys			7027	8327	3.6983	7.35913					-53.1508	Deleterious			-53.1508	Deleterious
50	p.Gln50Thr			5937	695	3.12464	0.614218					-10.882	Indeterminate			-10.882	Indeterminate
50	p.Gln50Arg		Deleterious	7334	11605	3.85988	10.2561					-53.1508	Deleterious			-53.1508	Deleterious
50	p.Gln50Ser			8421	926	4.43197	0.818368					-5.38522	Neutral			-5.38522	Neutral
50	p.Gln50Ile			8078	3493	4.25144	3.087					-53.1508	Deleterious			-53.1508	Deleterious
50	p.Gln50Met			9962	960	5.24299	0.848416					-2.0491	Neutral			-2.0491	Neutral
50	p.Gln50His			10223	4095	5.38036	3.61903					-53.1508	Deleterious			-53.1508	Deleterious
50	p.Gln50Gln	Synonymous		12106	1126	6.37138	0.995122					-1.06151	Neutral			-1.06151	Neutral
50	p.Gln50Pro			9549	16066	5.02563	14.1986					-53.1508	Deleterious			-53.1508	Deleterious
50	p.Gln50Leu			11007	1915	5.79297	1.69241					-19.9522	Indeterminate			-19.9521	Indeterminate
50	p.Gln50Asp			10090	6468	5.31036	5.7162					-53.1508	Deleterious			-53.1508	Deleterious
50	p.Gln50Glu			12681	1243	6.674	1.09852					-1.37327	Neutral			-1.37327	Neutral
50	p.Gln50Ala			7885	1001	4.14987	0.884651					-10.3874	Indeterminate			-10.3874	Indeterminate
50	p.Gln50Gly			7736	1057	4.07145	0.934142					-13.6355	Indeterminate			-13.6355	Indeterminate
50	p.Gln50Val			14010	5143	7.37345	4.54521					-53.1508	Deleterious			-53.1508	Deleterious
50	p.Gln50Tyr			13564	21314	7.13872	18.8366					-53.1508	Deleterious			-53.1508	Deleterious
50	p.Gln50Cys			9439	1625	4.96774	1.43612					-22.3661	Indeterminate			-22.3653	Indeterminate
50	p.Gln50Trp			10854	15054	5.71245	13.3042					-53.1508	Deleterious			-53.1508	Deleterious
50	p.Gln50Phe			7924	10276	4.17039	9.08159					-53.1508	Deleterious			-53.1508	Deleterious
51	p.Val51Asn			2467	455	1.69905	0.400687					-53.1508	Deleterious			-53.1508	Deleterious
51	p.Val51Lys			3393	9087	2.33679	8.00229					-53.1508	Deleterious			-53.1508	Deleterious
51	p.Val51Thr			3961	298	2.72798	0.262428					-4.90028	Neutral			-4.90028	Neutral
51	p.Val51Arg			3536	10023	2.43528	8.82656					-53.1508	Deleterious			-53.1508	Deleterious
51	p.Val51Ser			7469	443	5.14397	0.390119					-0.221758	Neutral			-0.221758	Neutral
51	p.Val51Ile			8945	908	6.16051	0.799613					-5.58037	Neutral			-5.58037	Neutral
51	p.Val51Met			6116	1205	4.21215	1.06116					-53.1508	Deleterious			-53.1508	Deleterious
51	p.Val51His			6561	10183	4.51863	8.96746					-53.1508	Deleterious			-53.1508	Deleterious
51	p.Val51Gln			10283	2904	7.082	2.55735					-53.1508	Deleterious			-53.1508	Deleterious
51	p.Val51Pro			12358	22046	8.51108	19.4144					-53.1508	Deleterious			-53.1508	Deleterious
51	p.Val51Leu			9977	848	6.87126	0.746775					-1.83724	Neutral			-1.83724	Neutral
51	p.Val51Asp			11158	18353	7.68463	16.1622					-53.1508	Deleterious			-53.1508	Deleterious
51	p.Val51Glu			7184	13435	4.94769	11.8313					-53.1508	Deleterious			-53.1508	Deleterious
51	p.Val51Ala			6834	308	4.70664	0.271234					-0.00939846	Neutral			-0.00939846	Neutral
51	p.Val51Gly			5966	473	4.10884	0.416538					-3.26055	Neutral			-3.26055	Neutral
51	p.Val51Val	Synonymous		10471	833	7.21148	0.733565					-1.06151	Neutral			-1.06151	Neutral
51	p.Val51Tyr			4583	4152	3.15636	3.65638					-53.1508	Deleterious			-53.1508	Deleterious
51	p.Val51Cys			13104	988	9.02486	0.870063					-0.372598	Neutral			-0.372598	Neutral
51	p.Val51Trp			7433	14300	5.11918	12.593					-53.1508	Deleterious			-53.1508	Deleterious
51	p.Val51Phe			3400	2313	2.34161	2.0369					-53.1508	Deleterious			-53.1508	Deleterious
52	p.Met52Asn			4478	6062	2.1501	2.76336					-16.423	Indeterminate			-16.423	Indeterminate
52	p.Met52Lys			3389	6716	1.62722	3.06148					-53.1508	Deleterious			-53.1508	Deleterious
52	p.Met52Thr			7325	6547	3.51709	2.98444					-1.16932	Neutral			-1.16932	Neutral
52	p.Met52Arg			3644	7476	1.74966	3.40793					-53.1508	Deleterious			-53.1508	Deleterious
52	p.Met52Ser			12692	10076	6.09404	4.59313					-0.0665233	Neutral			-0.0665233	Neutral
52	p.Met52Ile			4566	5019	2.19236	2.2879					-7.8188	Indeterminate			-7.8188	Indeterminate
52	p.Met52Met	Synonymous		4922	3803	2.36329	1.73359					-1.06151	Neutral			-1.06151	Neutral
52	p.Met52His			8903	10578	4.27476	4.82197					-4.18877	Neutral			-4.18877	Neutral
52	p.Met52Gln			8262	7816	3.96699	3.56291					-1.31332	Neutral			-1.31332	Neutral
52	p.Met52Pro			11304	19362	5.4276	8.82614					-13.0531	Indeterminate			-13.0531	Indeterminate
52	p.Met52Leu			19024	15490	9.13434	7.0611					-0.0148769	Neutral			-0.0148769	Neutral
52	p.Met52Asp			7647	15009	3.67169	6.84183					-28.2485	Indeterminate			-28.2032	Indeterminate
52	p.Met52Glu			10223	16152	4.90856	7.36287					-11.114	Indeterminate			-11.114	Indeterminate
52	p.Met52Ala			20519	16257	9.85216	7.41073					-0.00657866	Neutral			-0.00657866	Neutral
52	p.Met52Gly			28403	21442	13.6377	9.77431					-0.000404488	Neutral			-0.000404488	Neutral
52	p.Met52Val			16148	12224	7.75343	5.5723					-0.011242	Neutral			-0.011242	Neutral
52	p.Met52Tyr			5210	6051	2.50157	2.75834					-8.16831	Indeterminate			-8.16831	Indeterminate
52	p.Met52Cys			15883	11778	7.62619	5.36899					-0.00888488	Neutral			-0.00888488	Neutral
52	p.Met52Trp			10918	16716	5.24226	7.61997					-9.17384	Indeterminate			-9.17384	Indeterminate
52	p.Met52Phe			4809	4797	2.30903	2.18671					-4.81472	Neutral			-4.81472	Neutral
53	p.Met53Asn			5148	1876	4.44805	2.66841					-35.7732	Indeterminate			-32.9924	Indeterminate
53	p.Met53Lys			6247	1516	5.39763	2.15635					-8.88142	Indeterminate			-8.88142	Indeterminate
53	p.Met53Thr			5939	2515	5.13151	3.57732					-45.2996	Indeterminate			-33.2189	Indeterminate
53	p.Met53Arg			5012	915	4.33055	1.30149					-3.53545	Neutral			-3.53545	Neutral
53	p.Met53Ser			5763	1238	4.97944	1.76092					-6.06998	Indeterminate			-6.06998	Indeterminate
53	p.Met53Ile	Pathogenic		5291	4631	4.57161	6.58711					-53.1508	Deleterious			-53.1508	Deleterious
53	p.Met53Met	Synonymous		3139	402	2.71221	0.571802					-1.06151	Neutral			-1.06151	Neutral
53	p.Met53His			7214	3027	6.23315	4.30559					-38.3023	Indeterminate			-33.1773	Indeterminate
53	p.Met53Gln			8241	1527	7.12052	2.172					-1.48548	Neutral			-1.48548	Neutral
53	p.Met53Pro			5318	6610	4.59494	9.40203					-53.1508	Deleterious			-53.1508	Deleterious
53	p.Met53Leu			6554	1519	5.66289	2.16062					-6.97106	Indeterminate			-6.97106	Indeterminate
53	p.Met53Asp			5058	9025	4.37029	12.8371					-53.1508	Deleterious			-53.1508	Deleterious
53	p.Met53Glu			7104	3670	6.13811	5.22019					-53.1508	Deleterious			-53.1508	Deleterious
53	p.Met53Ala			6055	1223	5.23173	1.73959					-4.26907	Neutral			-4.26907	Neutral
53	p.Met53Gly			5478	4287	4.73319	6.0978					-53.1508	Deleterious			-53.1508	Deleterious
53	p.Met53Val	Likely pathogenic		5837	5714	5.04337	8.12756					-53.1508	Deleterious			-53.1508	Deleterious
53	p.Met53Tyr			5550	4771	4.7954	6.78624					-53.1508	Deleterious			-53.1508	Deleterious
53	p.Met53Cys			4558	1062	3.93827	1.51058					-11.1922	Indeterminate			-11.1922	Indeterminate
53	p.Met53Trp			7931	11517	6.85266	16.3817					-53.1508	Deleterious			-53.1508	Deleterious
53	p.Met53Phe			4299	3259	3.71449	4.63558					-53.1508	Deleterious			-53.1508	Deleterious
54	p.Met54Asn			4729	6229	4.81764	4.68064					-1.00163	Neutral			-1.00163	Neutral
54	p.Met54Lys			1457	2678	1.48431	2.01232					-23.4875	Indeterminate			-23.4858	Indeterminate
54	p.Met54Thr			9921	9389	10.107	7.05515					-0.000601633	Neutral			-0.000601633	Neutral
54	p.Met54Arg			2692	6197	2.74246	4.6566					-24.8726	Indeterminate			-24.8682	Indeterminate
54	p.Met54Ser			7785	8580	7.93093	6.44725					-0.0284053	Neutral			-0.0284053	Neutral
54	p.Met54Ile			4949	5748	5.04177	4.31921					-0.306243	Neutral			-0.306243	Neutral
54	p.Met54Met	Synonymous		1901	1865	1.93663	1.40141					-1.06151	Neutral			-1.06151	Neutral
54	p.Met54His			1990	2453	2.0273	1.84325					-3.79163	Neutral			-3.79163	Neutral
54	p.Met54Gln			3851	6289	3.92319	4.72573					-5.08577	Neutral			-5.08577	Neutral
54	p.Met54Pro			7720	20805	7.86471	15.6335					-14.1682	Indeterminate			-14.1682	Indeterminate
54	p.Met54Leu			5644	6063	5.7498	4.55591					-0.0818272	Neutral			-0.0818272	Neutral
54	p.Met54Asp			5244	12085	5.3423	9.081					-12.9268	Indeterminate			-12.9268	Indeterminate
54	p.Met54Glu			3404	6990	3.46781	5.25248					-14.1714	Indeterminate			-14.1714	Indeterminate
54	p.Met54Ala			4236	4218	4.3154	3.16952					-0.103141	Neutral			-0.103141	Neutral
54	p.Met54Gly			6165	6242	6.28056	4.69041					-0.0256224	Neutral			-0.0256224	Neutral
54	p.Met54Val			5273	5438	5.37184	4.08626					-0.0653621	Neutral			-0.0653621	Neutral
54	p.Met54Tyr			2374	2422	2.4185	1.81996					-0.820252	Neutral			-0.820252	Neutral
54	p.Met54Cys			7763	6885	7.90852	5.17358					-0.000822399	Neutral			-0.000822399	Neutral
54	p.Met54Trp			4101	4916	4.17787	3.69402					-0.69959	Neutral			-0.69959	Neutral
54	p.Met54Phe			6961	7588	7.09148	5.70183					-0.0405993	Neutral			-0.0405993	Neutral
55	p.Gly55Asn			7992	2142	3.28897	3.34797					-53.1508	Deleterious			-53.1508	Deleterious
55	p.Gly55Lys			10951	2798	4.5067	4.37331					-53.1508	Deleterious			-53.1508	Deleterious
55	p.Gly55Thr			17033	3602	7.00964	5.62997					-53.1508	Deleterious			-53.1508	Deleterious
55	p.Gly55Arg			11124	2826	4.57789	4.41707					-53.1508	Deleterious			-53.1508	Deleterious
55	p.Gly55Ser			12413	706	5.10836	1.10349					-32.6877	Indeterminate			-31.9291	Indeterminate
55	p.Gly55Ile			11813	2953	4.86144	4.61558					-53.1508	Deleterious			-53.1508	Deleterious
55	p.Gly55Met			10258	3064	4.2215	4.78907					-53.1508	Deleterious			-53.1508	Deleterious
55	p.Gly55His			14055	4676	5.78409	7.30865					-53.1508	Deleterious			-53.1508	Deleterious
55	p.Gly55Gln			14040	3922	5.77792	6.13014					-53.1508	Deleterious			-53.1508	Deleterious
55	p.Gly55Pro			24068	10469	9.90477	16.3632					-53.1508	Deleterious			-53.1508	Deleterious
55	p.Gly55Leu			21350	7759	8.78623	12.1274					-53.1508	Deleterious			-53.1508	Deleterious
55	p.Gly55Asp			12218	4275	5.02811	6.68188					-53.1508	Deleterious			-53.1508	Deleterious
55	p.Gly55Glu			16079	4459	6.61704	6.96947					-53.1508	Deleterious			-53.1508	Deleterious
55	p.Gly55Ala			8380	288	3.44864	0.450148					-11.0461	Indeterminate			-11.0461	Indeterminate
55	p.Gly55Gly	Synonymous		8104	172	3.33506	0.268838					-1.06151	Neutral			-1.06151	Neutral
55	p.Gly55Val			7187	2149	2.95769	3.35891					-53.1508	Deleterious			-53.1508	Deleterious
55	p.Gly55Tyr			10835	2494	4.45896	3.89815					-53.1508	Deleterious			-53.1508	Deleterious
55	p.Gly55Cys			9250	737	3.80668	1.15194					-53.1508	Deleterious			-53.1508	Deleterious
55	p.Gly55Trp			8904	2798	3.66429	4.37331					-53.1508	Deleterious			-53.1508	Deleterious
55	p.Gly55Phe			6940	1690	2.85604	2.64149					-53.1508	Deleterious			-53.1508	Deleterious
56	p.Ser56Asn			15782	229	5.04174	0.807077					-8.15074e-10	Neutral			-6.70804e-10	Neutral
56	p.Ser56Lys			21348	835	6.81986	2.94283					-0.0971452	Neutral			-0.0971452	Neutral
56	p.Ser56Thr			12135	459	3.87666	1.61768					-0.470511	Neutral			-0.470511	Neutral
56	p.Ser56Arg			12834	231	4.09997	0.814126					-1.41293e-06	Neutral			-1.41279e-06	Neutral
56	p.Ser56Ser	Synonymous		18053	863	5.76723	3.04152					-1.06151	Neutral			-1.06151	Neutral
56	p.Ser56Ile	Pathogenic		15771	4860	5.03822	17.1284					-53.1508	Deleterious			-53.1508	Deleterious
56	p.Ser56Met			9103	181	2.90806	0.637908					-0.000166389	Neutral			-0.000166388	Neutral
56	p.Ser56His			16781	342	5.36088	1.20533					-3.27343e-06	Neutral			-3.27328e-06	Neutral
56	p.Ser56Gln			13828	378	4.41751	1.33221					-0.00463344	Neutral			-0.00463344	Neutral
56	p.Ser56Pro			15799	9165	5.04717	32.3007					-53.1508	Deleterious			-53.1508	Deleterious
56	p.Ser56Leu			18803	1683	6.00683	5.93149					-17.5294	Indeterminate			-17.5293	Indeterminate
56	p.Ser56Asp			15719	594	5.02161	2.09347					-0.204811	Neutral			-0.204811	Neutral
56	p.Ser56Glu			16419	941	5.24523	3.31642					-3.78793	Neutral			-3.78793	Neutral
56	p.Ser56Ala			17828	655	5.69536	2.30845					-0.0940051	Neutral			-0.0940051	Neutral
56	p.Ser56Gly			20474	1154	6.54065	4.0671					-2.34236	Neutral			-2.34236	Neutral
56	p.Ser56Val			17532	973	5.60079	3.4292					-2.86428	Neutral			-2.86428	Neutral
56	p.Ser56Tyr			7771	187	2.48253	0.659054					-0.012804	Neutral			-0.012804	Neutral
56	p.Ser56Cys			14573	299	4.65551	1.05378					-1.12967e-05	Neutral			-1.12965e-05	Neutral
56	p.Ser56Trp			17186	3817	5.49026	13.4525					-53.1508	Deleterious			-53.1508	Deleterious
56	p.Ser56Phe			15288	528	4.88392	1.86086					-0.0825866	Neutral			-0.0825866	Neutral
57	p.Ala57Asn			4228	707	5.51059	4.84346	12028	2228	5.4353	4.67782	-8.42416e-07	Neutral	-1.686	Neutral	-0.569206	Neutral
57	p.Ala57Lys			3617	548	4.71424	3.7542	10968	2317	4.9563	4.86468	-2.62951e-07	Neutral	-4.12973	Neutral	-2.18019	Neutral
57	p.Ala57Thr			2864	570	3.73281	3.90491	8869	1879	4.00779	3.94508	-0.00064173	Neutral	-5.777	Neutral	-3.45434	Neutral
57	p.Ala57Arg			3189	550	4.1564	3.7679	11295	1899	5.10407	3.98707	-1.56794e-05	Neutral	-1.00517	Neutral	-0.242417	Neutral
57	p.Ala57Ser			4843	991	6.31215	6.78907	14163	3613	6.40008	7.58571	-3.19857e-05	Neutral	-6.569	Neutral	-4.09569	Neutral
57	p.Ala57Ile			2093	525	2.72792	3.59663	10521	1993	4.75431	4.18443	-0.10991	Neutral	-2.51386	Neutral	-1.12876	Neutral
57	p.Ala57Met			3187	502	4.1538	3.43906	8084	1645	3.65306	3.45378	-1.92311e-06	Neutral	-5.54136	Neutral	-3.26607	Neutral
57	p.Ala57His			4842	956	6.31085	6.54929	13594	1983	6.14296	4.16343	-1.45078e-05	Neutral	-0.162258	Neutral	-0.00849478	Neutral
57	p.Ala57Gln			4779	911	6.22874	6.24101	11318	2326	5.11446	4.88358	-7.20585e-06	Neutral	-3.41908	Neutral	-1.66636	Neutral
57	p.Ala57Pro			4088	887	5.32812	6.07659	10929	2644	4.93868	5.55124	-0.000347228	Neutral	-7.51248	Indeterminate	-4.87881	Neutral
57	p.Ala57Leu			3855	603	5.02444	4.13099	9126	2396	4.12393	5.03055	-3.44559e-07	Neutral	-12.5846	Indeterminate	-9.30317	Indeterminate
57	p.Ala57Asp			4487	1216	5.84816	8.33048	13571	2300	6.13257	4.82899	-0.0101441	Neutral	-0.669057	Neutral	-0.122613	Neutral
57	p.Ala57Glu			3993	794	5.2043	5.43947	13025	3886	5.88584	8.15889	-6.85657e-05	Neutral	-12.9976	Indeterminate	-9.67444	Indeterminate
57	p.Ala57Ala	Synonymous		2787	983	3.63245	6.73426	9862	1597	4.45651	3.353	-1.06151	Neutral	-1.06151	Neutral	-0.81759	Neutral
57	p.Ala57Gly			5677	999	7.39915	6.84387	13161	2709	5.94729	5.68771	-2.63028e-07	Neutral	-2.63932	Neutral	-1.13881	Neutral
57	p.Ala57Val	Likely benign		4184	783	5.45324	5.36412	14947	2673	6.75436	5.61213	-1.29445e-05	Neutral	-0.79419	Neutral	-0.16147	Neutral
57	p.Ala57Tyr			3130	578	4.0795	3.95972	8794	2642	3.9739	5.54704	-7.92584e-05	Neutral	-19.8533	Indeterminate	-15.9695	Indeterminate
57	p.Ala57Cys			4967	664	6.47377	4.54888	11591	2870	5.23783	6.02574	-5.41776e-10	Neutral	-7.62288	Indeterminate	-4.97124	Neutral
57	p.Ala57Trp			3220	520	4.19681	3.56238	8448	2110	3.81755	4.43007	-3.20654e-06	Neutral	-11.5897	Indeterminate	-8.4144	Indeterminate
57	p.Ala57Phe			2695	310	3.51254	2.12372	7000	1919	3.16321	4.02906	-2.374e-09	Neutral	-18.964	Indeterminate	-15.1418	Indeterminate
58	p.Arg58Asn			11388	6167	5.68147	5.2937					-0.000371166	Neutral			-0.000371166	Neutral
58	p.Arg58Lys			12667	6509	6.31957	5.58727					-6.16983e-05	Neutral			-6.16981e-05	Neutral
58	p.Arg58Thr			4945	2887	2.46706	2.47818					-0.0958085	Neutral			-0.0958085	Neutral
58	p.Arg58Arg	Synonymous		4309	3109	2.14976	2.66874					-1.06151	Neutral			-1.06151	Neutral
58	p.Arg58Ser			8923	4891	4.45168	4.19839					-0.00210036	Neutral			-0.00210036	Neutral
58	p.Arg58Ile			14106	8230	7.03748	7.06456					-0.000397103	Neutral			-0.000397103	Neutral
58	p.Arg58Met			8462	4305	4.22169	3.69537					-0.000743264	Neutral			-0.000743264	Neutral
58	p.Arg58His			10078	4647	5.02791	3.98894					-3.06737e-05	Neutral			-3.06736e-05	Neutral
58	p.Arg58Gln			8727	5863	4.3539	5.03275					-0.0527534	Neutral			-0.0527534	Neutral
58	p.Arg58Pro			9411	7328	4.69515	6.29029					-0.217807	Neutral			-0.217807	Neutral
58	p.Arg58Leu			10691	6368	5.33374	5.46624					-0.00313771	Neutral			-0.00313771	Neutral
58	p.Arg58Asp			10734	5563	5.35519	4.77523					-0.000229364	Neutral			-0.000229364	Neutral
58	p.Arg58Glu			12402	7460	6.18736	6.4036					-0.00156858	Neutral			-0.00156858	Neutral
58	p.Arg58Ala			8563	5464	4.27208	4.69025					-0.0287609	Neutral			-0.0287609	Neutral
58	p.Arg58Gly			9407	6284	4.69315	5.39413					-0.0351652	Neutral			-0.0351652	Neutral
58	p.Arg58Val			13045	8449	6.50815	7.25255					-0.00423303	Neutral			-0.00423303	Neutral
58	p.Arg58Tyr			11421	5102	5.69794	4.37951					-5.89543e-06	Neutral			-5.89529e-06	Neutral
58	p.Arg58Cys			10605	5418	5.29083	4.65076					-0.000186342	Neutral			-0.000186342	Neutral
58	p.Arg58Trp			8533	4672	4.25711	4.0104					-0.0026699	Neutral			-0.0026699	Neutral
58	p.Arg58Phe			12024	7781	5.99877	6.67914					-0.00651449	Neutral			-0.00651449	Neutral
59	p.Val59Asn			2415	585	4.1547	1.45104					-53.1508	Deleterious			-53.1508	Deleterious
59	p.Val59Lys			3708	3626	6.37914	8.99395					-53.1508	Deleterious			-53.1508	Deleterious
59	p.Val59Thr			3352	218	5.76668	0.540728					-0.211929	Neutral			-0.211929	Neutral
59	p.Val59Arg			2890	4202	4.97187	10.4227					-53.1508	Deleterious			-53.1508	Deleterious
59	p.Val59Ser			2742	260	4.71726	0.644905					-4.70041	Neutral			-4.70041	Neutral
59	p.Val59Ile			2316	130	3.98438	0.322453					-0.163545	Neutral			-0.163545	Neutral
59	p.Val59Met			2652	203	4.56242	0.503522					-1.54525	Neutral			-1.54525	Neutral
59	p.Val59His			2849	3587	4.90134	8.89721					-53.1508	Deleterious			-53.1508	Deleterious
59	p.Val59Gln			2872	790	4.94091	1.95952					-53.1508	Deleterious			-53.1508	Deleterious
59	p.Val59Pro			3188	3072	5.48454	7.6198					-53.1508	Deleterious			-53.1508	Deleterious
59	p.Val59Leu			3295	327	5.66862	0.811092					-4.3722	Neutral			-4.3722	Neutral
59	p.Val59Asp			2993	4745	5.14907	11.7695					-53.1508	Deleterious			-53.1508	Deleterious
59	p.Val59Glu			3323	3022	5.71679	7.49578					-53.1508	Deleterious			-53.1508	Deleterious
59	p.Val59Ala			2057	183	3.5388	0.453914					-5.42521	Neutral			-5.42521	Neutral
59	p.Val59Gly	Pathogenic		1783	295	3.06742	0.731719					-42.6747	Indeterminate			-33.2172	Indeterminate
59	p.Val59Val	Synonymous		3055	232	5.25573	0.575454					-1.06151	Neutral			-1.06151	Neutral
59	p.Val59Tyr			3471	4948	5.97141	12.273					-53.1508	Deleterious			-53.1508	Deleterious
59	p.Val59Cys			2693	193	4.63296	0.478718					-0.944072	Neutral			-0.944072	Neutral
59	p.Val59Trp			3706	6000	6.37569	14.8824					-53.1508	Deleterious			-53.1508	Deleterious
59	p.Val59Phe			2767	3698	4.76027	9.17254					-53.1508	Deleterious			-53.1508	Deleterious
60	p.Ala60Asn			8575	4388	3.77827	4.49043					-53.1508	Deleterious			-53.1508	Deleterious
60	p.Ala60Lys			13108	8103	5.77557	8.29214					-53.1508	Deleterious			-53.1508	Deleterious
60	p.Ala60Thr			14496	2990	6.38714	3.05979					-1.18249	Neutral			-1.18249	Neutral
60	p.Ala60Arg		Deleterious	11246	10734	4.95515	10.9846					-53.1508	Deleterious			-53.1508	Deleterious
60	p.Ala60Ser			13309	4554	5.86413	4.6603					-14.38	Indeterminate			-14.38	Indeterminate
60	p.Ala60Ile			11680	4451	5.14637	4.5549					-22.5191	Indeterminate			-22.5182	Indeterminate
60	p.Ala60Met			13714	3222	6.04258	3.29721					-2.93996	Neutral			-2.93996	Neutral
60	p.Ala60His			14244	7153	6.27611	7.31997					-38.3379	Indeterminate			-33.1783	Indeterminate
60	p.Ala60Gln			13494	8204	5.94565	8.3955					-53.1508	Deleterious			-53.1508	Deleterious
60	p.Ala60Pro			8977	2945	3.95539	3.01374					-18.8592	Indeterminate			-18.8591	Indeterminate
60	p.Ala60Leu			9673	1966	4.26206	2.01189					-2.50621	Neutral			-2.50621	Neutral
60	p.Ala60Asp			10802	5546	4.75951	5.67546					-49.5406	Indeterminate			-33.2193	Indeterminate
60	p.Ala60Glu	Likely pathogenic		12346	6697	5.43982	6.85332					-50.6781	Indeterminate			-33.2193	Indeterminate
60	p.Ala60Ala	Synonymous		12155	2329	5.35566	2.38336					-1.06151	Neutral			-1.06151	Neutral
60	p.Ala60Gly			10466	2098	4.61147	2.14697					-1.98451	Neutral			-1.98451	Neutral
60	p.Ala60Val			9945	2357	4.38191	2.41202					-5.18041	Neutral			-5.18041	Neutral
60	p.Ala60Tyr			9740	5258	4.29158	5.38073					-53.1508	Deleterious			-53.1508	Deleterious
60	p.Ala60Cys			9566	2423	4.21491	2.47956					-7.25614	Indeterminate			-7.25614	Indeterminate
60	p.Ala60Trp			8828	5434	3.88974	5.56084					-53.1508	Deleterious			-53.1508	Deleterious
60	p.Ala60Phe			10592	6867	4.66698	7.02729					-53.1508	Deleterious			-53.1508	Deleterious
61	p.Glu61Asn			14015	2650	5.27137	4.42996					-1.02324	Neutral			-1.02324	Neutral
61	p.Glu61Lys			12182	1826	4.58194	3.05249					-0.201271	Neutral			-0.201271	Neutral
61	p.Glu61Thr			15061	2530	5.6648	4.22935					-0.311111	Neutral			-0.311111	Neutral
61	p.Glu61Arg			12012	2820	4.518	4.71414					-4.80138	Neutral			-4.80138	Neutral
61	p.Glu61Ser			14189	2881	5.33682	4.81612					-1.61827	Neutral			-1.61827	Neutral
61	p.Glu61Ile			12732	2674	4.78881	4.47008					-2.46436	Neutral			-2.46436	Neutral
61	p.Glu61Met			14829	3250	5.57754	5.43297					-2.35415	Neutral			-2.35415	Neutral
61	p.Glu61His			13568	2686	5.10325	4.49014					-1.51223	Neutral			-1.51223	Neutral
61	p.Glu61Gln			13805	2206	5.19239	3.68773					-0.253165	Neutral			-0.253165	Neutral
61	p.Glu61Pro			10268	11949	3.86204	19.9749					-53.1508	Deleterious			-53.1508	Deleterious
61	p.Glu61Leu			17939	3142	6.74728	5.25242					-0.265412	Neutral			-0.265412	Neutral
61	p.Glu61Asp			12883	2304	4.8456	3.85155					-0.831958	Neutral			-0.831958	Neutral
61	p.Glu61Glu	Synonymous		14218	2715	5.34773	4.53862					-1.06151	Neutral			-1.06151	Neutral
61	p.Glu61Ala			13232	2302	4.97687	3.84821					-0.6227	Neutral			-0.6227	Neutral
61	p.Glu61Gly			11310	1790	4.25396	2.99231					-0.432411	Neutral			-0.432411	Neutral
61	p.Glu61Val			14302	2388	5.37932	3.99198					-0.345727	Neutral			-0.345727	Neutral
61	p.Glu61Tyr			11817	2739	4.44465	4.57874					-4.64108	Neutral			-4.64108	Neutral
61	p.Glu61Cys			13774	2388	5.18073	3.99198					-0.541062	Neutral			-0.541062	Neutral
61	p.Glu61Trp			14023	2781	5.27438	4.64895					-1.42344	Neutral			-1.42344	Neutral
61	p.Glu61Phe			9711	1799	3.65254	3.00736					-2.00202	Neutral			-2.00202	Neutral
62	p.Leu62Asn			5284	1310	4.67714	2.43925	3577	4531	4.52413	4.39677	-0.00291626	Neutral	-0.0204731	Neutral	-0.000187572	Neutral
62	p.Leu62Lys			5818	2856	5.14981	5.31794	4271	5506	5.40188	5.34288	-2.77912	Neutral	-0.0110428	Neutral	-1.23729	Neutral
62	p.Leu62Thr			4915	1901	4.35052	3.53971	4822	6010	6.09878	5.83195	-0.856867	Neutral	-0.00331741	Neutral	-0.185512	Neutral
62	p.Leu62Arg			3035	2548	2.68644	4.74444	2222	1857	2.81035	1.80199	-37.9211	Indeterminate	-0.000235667	Neutral	-28.5809	Indeterminate
62	p.Leu62Ser			3653	1159	3.23346	2.15809	2675	3190	3.38329	3.09549	-0.371446	Neutral	-0.034036	Neutral	-0.0481455	Neutral
62	p.Leu62Ile			1275	513	1.12857	0.955218	1037	743	1.31158	0.720988	-10.5807	Indeterminate	-0.00155335	Neutral	-7.52304	Indeterminate
62	p.Leu62Met			7821	2419	6.92277	4.50424	5702	4735	7.21179	4.59472	-0.0127549	Neutral	-1.56862e-07	Neutral	-5.60544e-05	Neutral
62	p.Leu62His			14346	3742	12.6984	6.96769	10997	15496	13.9088	15.0369	-1.03475e-05	Neutral	-0.000198045	Neutral	-1.50494e-08	Neutral
62	p.Leu62Gln			10306	14558	9.12237	27.1073	6533	14265	8.26282	13.8424	-49.0931	Indeterminate	-0.847768	Neutral	-29.4456	Indeterminate
62	p.Leu62Pro			56	9	0.0495685	0.0167582	31	12	0.0392082	0.0116445	-15.757	Indeterminate	-1.19251	Neutral	-13.2773	Indeterminate
62	p.Leu62Leu	Synonymous		3953	1464	3.499	2.726	2244	3542	2.83817	3.43707	-1.06151	Neutral	-1.06151	Neutral	-0.81759	Neutral
62	p.Leu62Asp			8215	3191	7.27152	5.94172	5245	9043	6.63378	8.7751	-0.192122	Neutral	-0.195344	Neutral	-0.0442619	Neutral
62	p.Leu62Glu			8076	3464	7.14848	6.45005	5397	3735	6.82603	3.62435	-0.521399	Neutral	-1.97572e-09	Neutral	-0.0763014	Neutral
62	p.Leu62Ala			5822	2021	5.15335	3.76315	3711	2780	4.69361	2.69764	-0.196026	Neutral	-4.26045e-07	Neutral	-0.0122222	Neutral
62	p.Leu62Gly			5101	2717	4.51516	5.05912	3194	5893	4.03971	5.71842	-5.16811	Neutral	-1.38986	Neutral	-4.08662	Neutral
62	p.Leu62Val			5797	2364	5.13122	4.40182	4147	3770	5.24505	3.65831	-0.844666	Neutral	-1.73409e-05	Neutral	-0.179755	Neutral
62	p.Leu62Tyr			5132	3349	4.5426	6.23592	3645	5500	4.61013	5.33706	-11.3947	Indeterminate	-0.171088	Neutral	-8.39315	Indeterminate
62	p.Leu62Cys			1257	423	1.11264	0.787636	849	1112	1.0738	1.07906	-5.30702	Neutral	-2.52566	Neutral	-5.14804	Neutral
62	p.Leu62Trp			7748	2419	6.85815	4.50424	5120	7229	6.47568	7.01484	-0.0153944	Neutral	-0.0175484	Neutral	-0.000370481	Neutral
62	p.Leu62Phe			5365	1278	4.74884	2.37967	3646	4104	4.6114	3.98242	-0.00131443	Neutral	-0.00283918	Neutral	-5.96778e-06	Neutral
63	p.Leu63Asn			13544	5590	7.01347	6.89434					-53.1508	Deleterious			-53.1508	Deleterious
63	p.Leu63Lys			6835	4935	3.53936	6.08651					-53.1508	Deleterious			-53.1508	Deleterious
63	p.Leu63Thr			10869	4259	5.62828	5.25277					-53.1508	Deleterious			-53.1508	Deleterious
63	p.Leu63Arg			9152	4924	4.73917	6.07294					-53.1508	Deleterious			-53.1508	Deleterious
63	p.Leu63Ser			8714	4308	4.51236	5.31321					-53.1508	Deleterious			-53.1508	Deleterious
63	p.Leu63Ile			10567	462	5.4719	0.569801					-5.21352	Neutral			-5.21352	Neutral
63	p.Leu63Met			8538	226	4.42122	0.278734					-0.302138	Neutral			-0.302138	Neutral
63	p.Leu63His			11608	6109	6.01096	7.53444					-53.1508	Deleterious			-53.1508	Deleterious
63	p.Leu63Gln			7276	4368	3.76772	5.38721					-53.1508	Deleterious			-53.1508	Deleterious
63	p.Leu63Pro			10214	6547	5.2891	8.07464					-53.1508	Deleterious			-53.1508	Deleterious
63	p.Leu63Leu	Synonymous		8789	273	4.5512	0.3367					-1.06151	Neutral			-1.06151	Neutral
63	p.Leu63Asp			6798	6741	3.5202	8.31391					-53.1508	Deleterious			-53.1508	Deleterious
63	p.Leu63Glu			13660	6285	7.07354	7.75151					-53.1508	Deleterious			-53.1508	Deleterious
63	p.Leu63Ala			9691	4744	5.01828	5.85094					-53.1508	Deleterious			-53.1508	Deleterious
63	p.Leu63Gly			8561	5277	4.43313	6.50831					-53.1508	Deleterious			-53.1508	Deleterious
63	p.Leu63Val			6705	689	3.47204	0.849768					-53.1508	Deleterious			-53.1508	Deleterious
63	p.Leu63Tyr			15623	7883	8.09004	9.72238					-53.1508	Deleterious			-53.1508	Deleterious
63	p.Leu63Cys			7726	791	4.00075	0.975568					-53.1508	Deleterious			-53.1508	Deleterious
63	p.Leu63Trp			11790	6222	6.1052	7.67381					-53.1508	Deleterious			-53.1508	Deleterious
63	p.Leu63Phe			6454	448	3.34207	0.552534					-37.9665	Indeterminate			-33.1665	Indeterminate
64	p.Leu64Asn			12833	6821	4.39143	5.63924					-11.0702	Indeterminate			-11.0702	Indeterminate
64	p.Leu64Lys			16339	6603	5.59118	5.45901					-2.26656	Neutral			-2.26656	Neutral
64	p.Leu64Thr			14425	4621	4.93621	3.8204					-0.600382	Neutral			-0.600382	Neutral
64	p.Leu64Arg			20825	9191	7.12628	7.59863					-2.36745	Neutral			-2.36745	Neutral
64	p.Leu64Ser			13437	4243	4.59812	3.50789					-0.647429	Neutral			-0.647429	Neutral
64	p.Leu64Ile			6398	2634	2.18939	2.17765					-10.1558	Indeterminate			-10.1558	Indeterminate
64	p.Leu64Met			11781	4017	4.03144	3.32104					-1.55563	Neutral			-1.55563	Neutral
64	p.Leu64His			21371	9431	7.31313	7.79705					-2.25137	Neutral			-2.25137	Neutral
64	p.Leu64Gln			15398	7296	5.26917	6.03195					-5.58135	Neutral			-5.58135	Neutral
64	p.Leu64Pro			1303	1822	0.445885	1.50633					-53.1508	Deleterious			-53.1508	Deleterious
64	p.Leu64Leu	Synonymous		15457	5454	5.28936	4.50908					-1.06151	Neutral			-1.06151	Neutral
64	p.Leu64Asp			14256	9066	4.87838	7.49529					-17.6467	Indeterminate			-17.6467	Indeterminate
64	p.Leu64Glu			14674	7300	5.02142	6.03525					-7.31873	Indeterminate			-7.31873	Indeterminate
64	p.Leu64Ala			18044	7247	6.17463	5.99143					-1.79083	Neutral			-1.79083	Neutral
64	p.Leu64Gly			19651	9506	6.72454	7.85906					-4.23495	Neutral			-4.23495	Neutral
64	p.Leu64Val			10172	2912	3.48084	2.40749					-0.618289	Neutral			-0.618289	Neutral
64	p.Leu64Tyr			14135	5042	4.83698	4.16846					-1.40589	Neutral			-1.40589	Neutral
64	p.Leu64Cys			15527	5308	5.31332	4.38837					-0.829728	Neutral			-0.829728	Neutral
64	p.Leu64Trp			20389	7820	6.97709	6.46516					-0.997579	Neutral			-0.997579	Neutral
64	p.Leu64Phe			15813	4622	5.41119	3.82122					-0.190864	Neutral			-0.190864	Neutral
65	p.Leu65Asn			1677	543	3.59578	3.38465					-12.0443	Indeterminate			-12.0443	Indeterminate
65	p.Leu65Lys			2335	440	5.00665	2.74263					-0.287994	Neutral			-0.287994	Neutral
65	p.Leu65Thr			2434	656	5.21892	4.08901					-3.3529	Neutral			-3.3529	Neutral
65	p.Leu65Arg			2730	595	5.8536	3.70878					-0.662527	Neutral			-0.662527	Neutral
65	p.Leu65Ser			2983	833	6.39607	5.1923					-2.82951	Neutral			-2.82951	Neutral
65	p.Leu65Ile			1967	438	4.21759	2.73016					-1.68723	Neutral			-1.68723	Neutral
65	p.Leu65Met			2487	463	5.33256	2.88599					-0.206482	Neutral			-0.206482	Neutral
65	p.Leu65His			1410	419	3.02329	2.61173					-10.9262	Indeterminate			-10.9262	Indeterminate
65	p.Leu65Gln			2753	794	5.90291	4.9492					-3.83993	Neutral			-3.83993	Neutral
65	p.Leu65Pro	Likely pathogenic		1740	4497	3.73086	28.0309					-53.1508	Deleterious			-53.1508	Deleterious
65	p.Leu65Leu	Synonymous		2636	604	5.65204	3.76488					-1.06151	Neutral			-1.06151	Neutral
65	p.Leu65Asp			2598	572	5.57056	3.56542					-0.817453	Neutral			-0.817453	Neutral
65	p.Leu65Glu			2759	572	5.91578	3.56542					-0.419357	Neutral			-0.419357	Neutral
65	p.Leu65Ala			2039	549	4.37197	3.42205					-4.45819	Neutral			-4.45819	Neutral
65	p.Leu65Gly			2677	911	5.73995	5.67849					-8.22285	Indeterminate			-8.22285	Indeterminate
65	p.Leu65Val			2667	680	5.71851	4.23861					-2.0835	Neutral			-2.0835	Neutral
65	p.Leu65Tyr			2428	553	5.20606	3.44699					-1.23338	Neutral			-1.23338	Neutral
65	p.Leu65Cys			2119	761	4.54351	4.7435					-13.1349	Indeterminate			-13.1349	Indeterminate
65	p.Leu65Trp			2348	753	5.03452	4.69364					-7.7321	Indeterminate			-7.7321	Indeterminate
65	p.Leu65Phe			1851	410	3.96887	2.55563					-1.85201	Neutral			-1.85201	Neutral
66	p.His66Asn			11379	793	4.83265	1.96452					-0.164934	Neutral			-0.164934	Neutral
66	p.His66Lys			12099	869	5.13843	2.1528					-0.183196	Neutral			-0.183196	Neutral
66	p.His66Thr			9820	910	4.17054	2.25437					-2.36179	Neutral			-2.36179	Neutral
66	p.His66Arg		Neutral	12631	1230	5.36437	3.04712					-1.93155	Neutral			-1.93155	Neutral
66	p.His66Ser			10876	904	4.61902	2.23951					-0.928411	Neutral			-0.928411	Neutral
66	p.His66Ile			11804	1490	5.01314	3.69123					-7.6633	Indeterminate			-7.6633	Indeterminate
66	p.His66Met			11778	860	5.0021	2.13051					-0.238401	Neutral			-0.238401	Neutral
66	p.His66His	Synonymous		9315	749	3.95607	1.85552					-1.06151	Neutral			-1.06151	Neutral
66	p.His66Gln			13561	1242	5.75934	3.07685					-1.10376	Neutral			-1.10376	Neutral
66	p.His66Pro		Deleterious	14437	20924	6.13138	51.8357					-53.1508	Deleterious			-53.1508	Deleterious
66	p.His66Leu			13015	1236	5.52745	3.06198					-1.54967	Neutral			-1.54967	Neutral
66	p.His66Asp			6613	509	2.80853	1.26096					-1.70277	Neutral			-1.70277	Neutral
66	p.His66Glu			13336	1439	5.66378	3.56488					-3.11969	Neutral			-3.11969	Neutral
66	p.His66Ala			12769	1270	5.42298	3.14621					-2.14574	Neutral			-2.14574	Neutral
66	p.His66Gly			13669	1191	5.80521	2.9505					-0.744785	Neutral			-0.744785	Neutral
66	p.His66Val			10655	1203	4.52517	2.98023					-5.55033	Neutral			-5.55033	Neutral
66	p.His66Tyr			10205	865	4.33405	2.14289					-1.24333	Neutral			-1.24333	Neutral
66	p.His66Cys			12241	683	5.19874	1.69202					-0.00585881	Neutral			-0.00585881	Neutral
66	p.His66Trp			14222	1111	6.04007	2.75232					-0.250486	Neutral			-0.250486	Neutral
66	p.His66Phe			11036	888	4.68698	2.19987					-0.695831	Neutral			-0.695831	Neutral
67	p.Gly67Asn			1613	199	4.18537	1.41145					-0.13376	Neutral			-0.13376	Neutral
67	p.Gly67Lys			1931	310	5.01051	2.19874					-0.883124	Neutral			-0.883124	Neutral
67	p.Gly67Thr			1987	510	5.15582	3.61728					-9.71202	Indeterminate			-9.71202	Indeterminate
67	p.Gly67Arg		Neutral	2225	231	5.77337	1.63841					-0.00244498	Neutral			-0.00244498	Neutral
67	p.Gly67Ser			1578	182	4.09455	1.29087					-0.0655662	Neutral			-0.0655662	Neutral
67	p.Gly67Ile			1553	1876	4.02968	13.3059					-53.1508	Deleterious			-53.1508	Deleterious
67	p.Gly67Met			1703	310	4.4189	2.19874					-2.61528	Neutral			-2.61528	Neutral
67	p.Gly67His			2343	275	6.07956	1.95049					-0.0136272	Neutral			-0.0136272	Neutral
67	p.Gly67Gln			1984	187	5.14803	1.32634					-0.000847932	Neutral			-0.000847932	Neutral
67	p.Gly67Pro			2448	5867	6.35201	41.6129					-53.1508	Deleterious			-53.1508	Deleterious
67	p.Gly67Leu			2000	298	5.18955	2.11363					-0.434606	Neutral			-0.434606	Neutral
67	p.Gly67Asp			1535	195	3.98298	1.38308					-0.21863	Neutral			-0.21863	Neutral
67	p.Gly67Glu			1601	201	4.15423	1.42563					-0.166618	Neutral			-0.166618	Neutral
67	p.Gly67Ala			2068	206	5.36599	1.4611					-0.00180966	Neutral			-0.00180966	Neutral
67	p.Gly67Gly	Synonymous		1598	247	4.14645	1.7519					-1.06151	Neutral			-1.06151	Neutral
67	p.Gly67Val			2037	1509	5.28555	10.7029					-53.1508	Deleterious			-53.1508	Deleterious
67	p.Gly67Tyr			2243	315	5.82008	2.2342					-0.16682	Neutral			-0.16682	Neutral
67	p.Gly67Cys			1798	317	4.6654	2.24839					-1.95584	Neutral			-1.95584	Neutral
67	p.Gly67Trp			1957	441	5.07797	3.12788					-5.92128	Indeterminate			-5.92128	Indeterminate
67	p.Gly67Phe			2337	423	6.06399	3.00021					-1.32414	Neutral			-1.32414	Neutral
68	p.Ala68Asn			10578	6466	3.32395	4.05374					-53.1508	Deleterious			-53.1508	Deleterious
68	p.Ala68Lys			16843	13015	5.29261	8.15952					-53.1508	Deleterious			-53.1508	Deleterious
68	p.Ala68Thr			20629	5342	6.4823	3.34907					-2.88289	Neutral			-2.88289	Neutral
68	p.Ala68Arg			9508	7401	2.98772	4.63992					-53.1508	Deleterious			-53.1508	Deleterious
68	p.Ala68Ser			15363	2849	4.82755	1.78613					-0.589716	Neutral			-0.589716	Neutral
68	p.Ala68Ile			11369	7162	3.57251	4.49009					-53.1508	Deleterious			-53.1508	Deleterious
68	p.Ala68Met			20851	11459	6.55206	7.18401					-38.1825	Indeterminate			-33.1738	Indeterminate
68	p.Ala68His			14597	6003	4.58685	3.76347					-24.886	Indeterminate			-24.8816	Indeterminate
68	p.Ala68Gln			14112	8817	4.43444	5.52766					-53.1508	Deleterious			-53.1508	Deleterious
68	p.Ala68Pro			19019	12912	5.97638	8.09494					-53.1508	Deleterious			-53.1508	Deleterious
68	p.Ala68Leu	Likely pathogenic		17116	12054	5.3784	7.55704					-53.1508	Deleterious			-53.1508	Deleterious
68	p.Ala68Asp			14679	6960	4.61261	4.36344					-35.4813	Indeterminate			-32.9461	Indeterminate
68	p.Ala68Glu			19547	9872	6.1423	6.18907					-32.8402	Indeterminate			-32.0173	Indeterminate
68	p.Ala68Ala	Synonymous		13663	2629	4.29335	1.6482					-1.06151	Neutral			-1.06151	Neutral
68	p.Ala68Gly			15153	3134	4.76156	1.9648					-1.38052	Neutral			-1.38052	Neutral
68	p.Ala68Val			20388	6977	6.40657	4.3741					-9.99991	Indeterminate			-9.99991	Indeterminate
68	p.Ala68Tyr			10108	7330	3.17626	4.59541					-53.1508	Deleterious			-53.1508	Deleterious
68	p.Ala68Cys			21550	4671	6.7717	2.9284					-0.835593	Neutral			-0.835593	Neutral
68	p.Ala68Trp			16659	12867	5.23479	8.06673					-53.1508	Deleterious			-53.1508	Deleterious
68	p.Ala68Phe			16504	11587	5.18609	7.26426					-53.1508	Deleterious			-53.1508	Deleterious
69	p.Glu69Asn			1335	244	3.52941	5.25975					-53.1508	Deleterious			-53.1508	Deleterious
69	p.Glu69Lys			1741	274	4.60278	5.90645					-35.7943	Indeterminate			-32.9955	Indeterminate
69	p.Glu69Thr			1856	192	4.90681	4.13882					-9.92885	Indeterminate			-9.92885	Indeterminate
69	p.Glu69Arg			1897	137	5.0152	2.95322					-1.74833	Neutral			-1.74833	Neutral
69	p.Glu69Ser			2201	266	5.8189	5.73399					-13.9258	Indeterminate			-13.9258	Indeterminate
69	p.Glu69Ile			2528	228	6.68341	4.91485					-3.57062	Neutral			-3.57062	Neutral
69	p.Glu69Met			2022	315	5.34567	6.79026					-30.934	Indeterminate			-30.6648	Indeterminate
69	p.Glu69His			1853	178	4.89888	3.83703					-7.5124	Indeterminate			-7.5124	Indeterminate
69	p.Glu69Gln			1715	155	4.53404	3.34124					-6.50853	Indeterminate			-6.50853	Indeterminate
69	p.Glu69Pro			1958	639	5.17647	13.7745					-53.1508	Deleterious			-53.1508	Deleterious
69	p.Glu69Leu			1850	329	4.89095	7.09205					-45.2518	Indeterminate			-33.2189	Indeterminate
69	p.Glu69Asp			1695	145	4.48116	3.12567					-5.22072	Neutral			-5.22072	Neutral
69	p.Glu69Glu	Synonymous		1906	128	5.039	2.75922					-1.06151	Neutral			-1.06151	Neutral
69	p.Glu69Ala			1875	102	4.95704	2.19875					-0.172772	Neutral			-0.172772	Neutral
69	p.Glu69Gly			1878	211	4.96497	4.54839					-13.0341	Indeterminate			-13.0341	Indeterminate
69	p.Glu69Val			2070	301	5.47257	6.48847					-25.3922	Indeterminate			-25.3859	Indeterminate
69	p.Glu69Tyr			1544	146	4.08196	3.14723					-8.93155	Indeterminate			-8.93155	Indeterminate
69	p.Glu69Cys			2103	199	5.55981	4.28972					-5.93541	Indeterminate			-5.93541	Indeterminate
69	p.Glu69Trp			1943	251	5.13681	5.41065					-19.3842	Indeterminate			-19.3841	Indeterminate
69	p.Glu69Phe			1855	199	4.90416	4.28972					-11.3008	Indeterminate			-11.3008	Indeterminate
70	p.Pro70Asn			1067	1056	7.79515	6.39186					-3.0971	Neutral			-3.0971	Neutral
70	p.Pro70Lys			292	407	2.13326	2.46353					-41.6039	Indeterminate			-33.215	Indeterminate
70	p.Pro70Thr			534	451	3.90123	2.72986					-4.42215	Neutral			-4.42215	Neutral
70	p.Pro70Arg			1225	962	8.94944	5.82289					-0.464977	Neutral			-0.464977	Neutral
70	p.Pro70Ser			611	1001	4.46376	6.05896					-34.2011	Indeterminate			-32.6282	Indeterminate
70	p.Pro70Ile			868	595	6.34132	3.60148					-0.383066	Neutral			-0.383066	Neutral
70	p.Pro70Met			1191	437	8.70105	2.64512					-1.7257e-06	Neutral			-1.72555e-06	Neutral
70	p.Pro70His			344	116	2.51315	0.702137					-0.00173841	Neutral			-0.00173841	Neutral
70	p.Pro70Gln			453	139	3.30947	0.841353					-4.42671e-05	Neutral			-4.4267e-05	Neutral
70	p.Pro70Pro	Synonymous		683	490	4.98977	2.96592					-1.06151	Neutral			-1.06151	Neutral
70	p.Pro70Leu			725	642	5.29661	3.88596					-3.38588	Neutral			-3.38588	Neutral
70	p.Pro70Asp			669	5207	4.88749	31.5175					-53.1508	Deleterious			-53.1508	Deleterious
70	p.Pro70Glu			405	1516	2.9588	9.1762					-53.1508	Deleterious			-53.1508	Deleterious
70	p.Pro70Ala			506	362	3.69667	2.19115					-2.00824	Neutral			-2.00824	Neutral
70	p.Pro70Gly			500	371	3.65283	2.24563					-2.54089	Neutral			-2.54089	Neutral
70	p.Pro70Val			703	347	5.13589	2.10036					-0.0180402	Neutral			-0.0180402	Neutral
70	p.Pro70Tyr			458	314	3.346	1.90061					-1.89576	Neutral			-1.89576	Neutral
70	p.Pro70Cys			1010	291	7.37873	1.76139					-1.4781e-08	Neutral			-1.46367e-08	Neutral
70	p.Pro70Trp			557	1275	4.06926	7.71745					-53.1508	Deleterious			-53.1508	Deleterious
70	p.Pro70Phe			887	542	6.48013	3.28067					-0.10798	Neutral			-0.10798	Neutral
71	p.Asn71Asn	Synonymous		7181	171	4.6159	0.295863					-1.06151	Neutral			-1.06151	Neutral
71	p.Asn71Lys		Deleterious	8578	3658	5.51388	6.32905					-53.1508	Deleterious			-53.1508	Deleterious
71	p.Asn71Thr			7155	580	4.59919	1.00351					-53.1508	Deleterious			-53.1508	Deleterious
71	p.Asn71Arg			7444	2468	4.78495	4.27012					-53.1508	Deleterious			-53.1508	Deleterious
71	p.Asn71Ser	Likely pathogenic		5704	4086	3.66649	7.06957					-53.1508	Deleterious			-53.1508	Deleterious
71	p.Asn71Ile		Deleterious	7003	6534	4.50148	11.3051					-53.1508	Deleterious			-53.1508	Deleterious
71	p.Asn71Met			4089	487	2.62838	0.842604					-53.1508	Deleterious			-53.1508	Deleterious
71	p.Asn71His			7484	353	4.81067	0.610758					-20.6441	Indeterminate			-20.6439	Indeterminate
71	p.Asn71Gln			6723	266	4.3215	0.460231					-13.4734	Indeterminate			-13.4734	Indeterminate
71	p.Asn71Pro			8614	17352	5.53702	30.0223					-53.1508	Deleterious			-53.1508	Deleterious
71	p.Asn71Leu			7663	5928	4.92573	10.2566					-53.1508	Deleterious			-53.1508	Deleterious
71	p.Asn71Asp			9069	498	5.82949	0.861636					-26.2705	Indeterminate			-26.2589	Indeterminate
71	p.Asn71Glu			10749	485	6.90939	0.839144					-12.424	Indeterminate			-12.424	Indeterminate
71	p.Asn71Ala			11275	608	7.24749	1.05196					-20.5152	Indeterminate			-20.515	Indeterminate
71	p.Asn71Gly			6444	162	4.14216	0.280291					-1.92924	Neutral			-1.92924	Neutral
71	p.Asn71Val			7148	4897	4.59469	8.47276					-53.1508	Deleterious			-53.1508	Deleterious
71	p.Asn71Tyr			8986	3770	5.77614	6.52283					-53.1508	Deleterious			-53.1508	Deleterious
71	p.Asn71Cys			6712	283	4.31443	0.489645					-16.5022	Indeterminate			-16.5022	Indeterminate
71	p.Asn71Trp			8041	1238	5.1687	2.14198					-53.1508	Deleterious			-53.1508	Deleterious
71	p.Asn71Phe			9509	3973	6.11232	6.87406					-53.1508	Deleterious			-53.1508	Deleterious
72	p.Cys72Asn			8802	378	5.54761	6.2531	3988	1635	5.16841	4.65507	-7.97599	Indeterminate	-0.388308	Neutral	-5.59925	Neutral
72	p.Cys72Lys			6740	268	4.248	4.43342	3506	1606	4.54375	4.5725	-8.3433	Indeterminate	-1.30978	Neutral	-6.70991	Indeterminate
72	p.Cys72Thr			10096	417	6.36317	6.89826	4817	1804	6.24279	5.13624	-5.62932	Neutral	-0.0758341	Neutral	-3.39641	Neutral
72	p.Cys72Arg			5486	148	3.45764	2.4483	4246	1315	5.50278	3.74399	-1.75251	Neutral	-0.00963268	Neutral	-0.610658	Neutral
72	p.Cys72Ser			7807	304	4.92049	5.02895	2617	1397	3.39161	3.97745	-6.3051	Indeterminate	-5.20184	Neutral	-8.34087	Indeterminate
72	p.Cys72Ile			7381	305	4.652	5.04549	3965	1960	5.13861	5.58039	-8.61206	Indeterminate	-1.65263	Neutral	-7.24411	Indeterminate
72	p.Cys72Met			6176	187	3.89253	3.09347	2324	1050	3.01188	2.98949	-2.7382	Neutral	-2.76973	Neutral	-3.23955	Neutral
72	p.Cys72His			4117	134	2.59481	2.21671	1768	865	2.29131	2.46277	-7.22805	Indeterminate	-6.27246	Neutral	-10.1279	Indeterminate
72	p.Cys72Gln			6432	304	4.05388	5.02895	3140	1134	4.06941	3.22865	-15.9427	Indeterminate	-0.246286	Neutral	-12.5777	Indeterminate
72	p.Cys72Pro			9516	455	5.99762	7.52688	6995	2515	9.06546	7.16055	-10.7855	Indeterminate	-0.00741578	Neutral	-7.7087	Indeterminate
72	p.Cys72Leu			4547	198	2.86582	3.27543	1856	930	2.40536	2.64784	-17.6381	Indeterminate	-6.47967	Neutral	-19.9707	Indeterminate
72	p.Cys72Asp			9589	296	6.04363	4.89661	4756	2676	6.16374	7.61894	-1.25621	Neutral	-2.50077	Neutral	-1.90733	Neutral
72	p.Cys72Glu			10351	375	6.52389	6.20347	4290	2323	5.5598	6.6139	-2.85905	Neutral	-2.44338	Neutral	-3.07735	Neutral
72	p.Cys72Ala			8098	266	5.1039	4.40033	2928	1595	3.79466	4.54118	-2.61202	Neutral	-4.81488	Neutral	-4.8068	Neutral
72	p.Cys72Gly			4850	154	3.05679	2.54756	3719	984	4.81979	2.80158	-5.16316	Neutral	-0.00142154	Neutral	-2.96929	Neutral
72	p.Cys72Val			9374	377	5.90812	6.23656	5039	2858	6.5305	8.13712	-5.58023	Neutral	-2.34624	Neutral	-5.22731	Neutral
72	p.Cys72Tyr			11042	374	6.9594	6.18693	5452	2304	7.06575	6.5598	-1.70091	Neutral	-0.188211	Neutral	-0.681576	Neutral
72	p.Cys72Cys	Synonymous		9589	289	6.04363	4.78081	3417	1506	4.4284	4.28779	-1.06151	Neutral	-1.06151	Neutral	-0.81759	Neutral
72	p.Cys72Trp			10835	582	6.82894	9.62779	4896	2290	6.34517	6.51994	-13.8151	Indeterminate	-0.671682	Neutral	-11.0219	Indeterminate
72	p.Cys72Phe			7835	234	4.93814	3.87097	3442	2376	4.4608	6.7648	-1.57642	Neutral	-10.1233	Indeterminate	-8.51237	Indeterminate
73	p.Ala73Asn			6226	776	4.29774	5.20142	11983	6680	4.44351	4.78191	-7.09843	Indeterminate	-3.83301	Neutral	-7.83095	Indeterminate
73	p.Ala73Lys			5464	431	3.77174	2.88893	9537	5074	3.53649	3.63225	-0.666467	Neutral	-4.4127	Neutral	-2.90265	Neutral
73	p.Ala73Thr			11273	1232	7.78162	8.25793	21395	10364	7.93365	7.41913	-1.26204	Neutral	-0.41015	Neutral	-0.561778	Neutral
73	p.Ala73Arg			6861	819	4.73607	5.48964	13885	6784	5.14881	4.85636	-5.14532	Neutral	-1.34999	Neutral	-4.0353	Neutral
73	p.Ala73Ser			7157	807	4.94039	5.40921	13597	7093	5.04201	5.07756	-3.6729	Neutral	-2.13383	Neutral	-3.47763	Neutral
73	p.Ala73Ile			6816	562	4.70501	3.76701	11736	5986	4.35192	4.28511	-0.52291	Neutral	-2.48555	Neutral	-1.38305	Neutral
73	p.Ala73Met			4904	408	3.38517	2.73477	9903	5188	3.67221	3.71386	-1.29384	Neutral	-3.85563	Neutral	-2.95748	Neutral
73	p.Ala73His			12140	1111	8.3801	7.44688	19805	9884	7.34405	7.07552	-0.230898	Neutral	-0.659782	Neutral	-0.197028	Neutral
73	p.Ala73Gln			4919	518	3.39553	3.47208	8952	4454	3.31956	3.18842	-4.809	Neutral	-3.5224	Neutral	-5.57121	Neutral
73	p.Ala73Pro			8448	860	5.83156	5.76446	14367	8124	5.32754	5.81561	-1.49086	Neutral	-3.02751	Neutral	-2.47156	Neutral
73	p.Ala73Leu			6766	587	4.67049	3.93458	12546	6520	4.65228	4.66738	-0.807131	Neutral	-2.43737	Neutral	-1.54454	Neutral
73	p.Ala73Asp			4742	488	3.27335	3.271	7482	3511	2.77446	2.51337	-4.57327	Neutral	-3.54105	Neutral	-5.38652	Neutral
73	p.Ala73Glu			7289	687	5.03151	4.60487	13173	7029	4.88479	5.03175	-1.23436	Neutral	-2.58176	Neutral	-1.95015	Neutral
73	p.Ala73Ala	Synonymous		9811	999	6.77242	6.69616	18989	9945	7.04146	7.11918	-1.06151	Neutral	-1.06151	Neutral	-0.81759	Neutral
73	p.Ala73Gly			7551	854	5.21237	5.72424	15359	8099	5.6954	5.79771	-3.40778	Neutral	-1.78172	Neutral	-2.98878	Neutral
73	p.Ala73Val			7585	867	5.23584	5.81138	16194	7473	6.00503	5.34959	-3.56986	Neutral	-0.600435	Neutral	-2.21029	Neutral
73	p.Ala73Tyr			8714	958	6.01517	6.42134	14375	8705	5.33051	6.23152	-2.25062	Neutral	-4.27251	Neutral	-4.05807	Neutral
73	p.Ala73Cys			7123	790	4.91692	5.29526	13784	7017	5.11136	5.02316	-3.4048	Neutral	-1.78969	Neutral	-2.99268	Neutral
73	p.Ala73Trp			5446	663	3.75931	4.444	11835	6004	4.38863	4.298	-7.71682	Indeterminate	-2.37236	Neutral	-7.09038	Indeterminate
73	p.Ala73Phe			5632	502	3.8877	3.36484	10777	5759	3.99631	4.12261	-1.5083	Neutral	-3.70091	Neutral	-3.00421	Neutral
74	p.Asp74Asn			1709	639	4.77321	1.32254	1637	440	4.33069	2.22121	-16.1224	Indeterminate	-26.3027	Indeterminate	-53.1508	Deleterious
74	p.Asp74Lys			2080	5773	5.80941	11.9484	2112	2212	5.5873	11.1666	-53.1508	Deleterious	-53.1508	Deleterious	-53.1508	Deleterious
74	p.Asp74Thr			1807	2120	5.04692	4.38778	2075	1153	5.48942	5.82059	-53.1508	Deleterious	-53.1508	Deleterious	-53.1508	Deleterious
74	p.Asp74Arg			1651	4359	4.61122	9.02186	1825	1757	4.82804	8.86971	-53.1508	Deleterious	-53.1508	Deleterious	-53.1508	Deleterious
74	p.Asp74Ser			1832	475	5.11675	0.983111	1970	439	5.21164	2.21616	-3.49696	Neutral	-12.6074	Indeterminate	-12.5	Indeterminate
74	p.Asp74Ile			1665	5131	4.65032	10.6197	1904	1506	5.03704	7.6026	-53.1508	Deleterious	-53.1508	Deleterious	-53.1508	Deleterious
74	p.Asp74Met			2121	2922	5.92392	6.04769	2291	1390	6.06085	7.01701	-53.1508	Deleterious	-53.1508	Deleterious	-53.1508	Deleterious
74	p.Asp74His		Neutral	1436	376	4.01073	0.77821	1554	225	4.11111	1.13585	-5.37911	Neutral	-2.83531	Neutral	-5.47159	Neutral
74	p.Asp74Gln			1572	2339	4.39057	4.84105	1722	962	4.55556	4.85638	-53.1508	Deleterious	-53.1508	Deleterious	-53.1508	Deleterious
74	p.Asp74Pro			1306	3867	3.64764	8.00356	1439	1350	3.80688	6.81508	-53.1508	Deleterious	-53.1508	Deleterious	-53.1508	Deleterious
74	p.Asp74Leu			2179	3931	6.08591	8.13602	2204	1598	5.83069	8.06704	-53.1508	Deleterious	-53.1508	Deleterious	-53.1508	Deleterious
74	p.Asp74Asp	Synonymous		2293	526	6.40431	1.08867	2368	337	6.26455	1.70125	-1.06151	Neutral	-1.06151	Neutral	-0.81759	Neutral
74	p.Asp74Glu			1910	219	5.3346	0.453266	1855	108	4.90741	0.545207	-0.000234829	Neutral	-4.71539e-06	Neutral	-1.98846e-08	Neutral
74	p.Asp74Ala		Deleterious	1340	933	3.7426	1.93104	1438	505	3.80423	2.54935	-53.1508	Deleterious	-53.1508	Deleterious	-53.1508	Deleterious
74	p.Asp74Gly			1450	722	4.04983	1.49433	1509	400	3.99206	2.01928	-39.8218	Indeterminate	-27.2214	Indeterminate	-53.1508	Deleterious
74	p.Asp74Val			2034	4350	5.68093	9.00323	2153	1594	5.69577	8.04685	-53.1508	Deleterious	-53.1508	Deleterious	-53.1508	Deleterious
74	p.Asp74Tyr		Deleterious	1872	2840	5.22847	5.87797	1987	1081	5.25661	5.45712	-53.1508	Deleterious	-53.1508	Deleterious	-53.1508	Deleterious
74	p.Asp74Cys			1766	266	4.93241	0.550542	1743	175	4.61111	0.883437	-0.0363112	Neutral	-0.108201	Neutral	-0.00678806	Neutral
74	p.Asp74Trp			2243	3647	6.26466	7.54822	2314	1334	6.12169	6.73431	-53.1508	Deleterious	-53.1508	Deleterious	-53.1508	Deleterious
74	p.Asp74Phe			1538	2881	4.29561	5.96283	1700	1243	4.49735	6.27493	-53.1508	Deleterious	-53.1508	Deleterious	-53.1508	Deleterious
75	p.Pro75Asn			9670	524	4.87063	4.67523	11723	3674	4.98473	5.5852	-1.8368	Neutral	-2.33288	Neutral	-2.20983	Neutral
75	p.Pro75Lys			9337	609	4.7029	5.43362	11391	3490	4.84357	5.30548	-5.17881	Neutral	-2.16126	Neutral	-4.73416	Neutral
75	p.Pro75Thr			11192	685	5.63724	6.11171	12660	3467	5.38316	5.27052	-2.80916	Neutral	-0.798176	Neutral	-1.79981	Neutral
75	p.Pro75Arg			9880	459	4.9764	4.09529	10942	3084	4.65265	4.68828	-0.574968	Neutral	-1.39161	Neutral	-0.725878	Neutral
75	p.Pro75Ser			10276	621	5.17586	5.54069	11437	2762	4.86312	4.19878	-3.05586	Neutral	-0.365618	Neutral	-1.66805	Neutral
75	p.Pro75Ile			9905	491	4.98899	4.3808	11194	3667	4.7598	5.57456	-0.952449	Neutral	-3.23422	Neutral	-2.22247	Neutral
75	p.Pro75Met			9184	602	4.62584	5.37116	11731	3461	4.98814	5.2614	-5.42553	Neutral	-1.61351	Neutral	-4.48345	Neutral
75	p.Pro75His			9528	472	4.79911	4.21128	10826	2310	4.60332	3.51165	-1.0416	Neutral	-0.123266	Neutral	-0.31093	Neutral
75	p.Pro75Gln			8492	532	4.27729	4.74661	11101	3043	4.72025	4.62596	-4.97665	Neutral	-1.11141	Neutral	-3.70403	Neutral
75	p.Pro75Pro	Synonymous		11272	592	5.67753	5.28194	11825	3289	5.02811	4.99992	-1.06151	Neutral	-1.06151	Neutral	-0.81759	Neutral
75	p.Pro75Leu			8173	440	4.11661	3.92577	10218	2734	4.34479	4.15622	-2.45987	Neutral	-1.13795	Neutral	-1.79301	Neutral
75	p.Pro75Asp			7922	428	3.99019	3.8187	9264	2396	3.93914	3.64239	-2.65915	Neutral	-1.12671	Neutral	-1.92822	Neutral
75	p.Pro75Glu			10198	576	5.13657	5.13919	12698	3162	5.39931	4.80686	-2.12144	Neutral	-0.352009	Neutral	-1.03278	Neutral
75	p.Pro75Ala			10907	615	5.49369	5.48715	13939	3795	5.927	5.76914	-1.83431	Neutral	-0.589013	Neutral	-1.00124	Neutral
75	p.Pro75Gly			8363	444	4.21231	3.96146	10388	2646	4.41708	4.02244	-2.17172	Neutral	-0.757186	Neutral	-1.32951	Neutral
75	p.Pro75Val			11370	636	5.72689	5.67452	14557	4466	6.18978	6.78919	-1.5986	Neutral	-1.30083	Neutral	-1.3098	Neutral
75	p.Pro75Tyr			11247	621	5.66494	5.54069	12810	3790	5.44694	5.76154	-1.50421	Neutral	-1.35639	Neutral	-1.28392	Neutral
75	p.Pro75Cys			9823	570	4.94769	5.08565	11358	2913	4.82953	4.42833	-2.65926	Neutral	-0.630686	Neutral	-1.57607	Neutral
75	p.Pro75Trp			11015	691	5.54808	6.16524	13000	4054	5.52773	6.16287	-3.29392	Neutral	-1.84528	Neutral	-2.94947	Neutral
75	p.Pro75Phe			10783	600	5.43123	5.35332	12116	3578	5.15184	5.43926	-1.72917	Neutral	-1.51462	Neutral	-1.54405	Neutral
76	p.Ala76Asn			1971	8478	4.40733	5.27695					-13.4047	Indeterminate			-13.4047	Indeterminate
76	p.Ala76Lys			1935	7710	4.32683	4.79892					-10.5445	Indeterminate			-10.5445	Indeterminate
76	p.Ala76Thr			2338	7340	5.22797	4.56863					-2.82553	Neutral			-2.82553	Neutral
76	p.Ala76Arg			1828	7490	4.08757	4.66199					-12.3957	Indeterminate			-12.3957	Indeterminate
76	p.Ala76Ser			2564	10119	5.73332	6.29835					-7.14007	Indeterminate			-7.14007	Indeterminate
76	p.Ala76Ile			1198	4992	2.67883	3.10716					-20.1723	Indeterminate			-20.1721	Indeterminate
76	p.Ala76Met			2897	9059	6.47794	5.63858					-1.827	Neutral			-1.827	Neutral
76	p.Ala76His			2955	11104	6.60763	6.91145					-4.71193	Neutral			-4.71193	Neutral
76	p.Ala76Gln			1360	5492	3.04108	3.41838					-16.2212	Indeterminate			-16.2211	Indeterminate
76	p.Ala76Pro			2850	9900	6.37284	6.16204					-3.4067	Neutral			-3.4067	Neutral
76	p.Ala76Leu			1821	6818	4.07191	4.24372					-9.04734	Indeterminate			-9.04734	Indeterminate
76	p.Ala76Asp			2380	8354	5.32188	5.19977					-4.79292	Neutral			-4.79292	Neutral
76	p.Ala76Glu			2284	9100	5.10722	5.6641					-8.61312	Indeterminate			-8.61312	Indeterminate
76	p.Ala76Ala	Synonymous		1395	3155	3.11934	1.96376					-1.06151	Neutral			-1.06151	Neutral
76	p.Ala76Gly			2810	9192	6.2834	5.72136					-2.53031	Neutral			-2.53031	Neutral
76	p.Ala76Val			1949	6091	4.35813	3.79121					-3.7775	Neutral			-3.7775	Neutral
76	p.Ala76Tyr			2465	8009	5.51195	4.98503					-3.09132	Neutral			-3.09132	Neutral
76	p.Ala76Cys			2123	9589	4.74721	5.96847					-14.4952	Indeterminate			-14.4952	Indeterminate
76	p.Ala76Trp			3462	10823	7.74133	6.73654					-1.23871	Neutral			-1.23871	Neutral
76	p.Ala76Phe			2136	7846	4.77628	4.88357					-6.82382	Indeterminate			-6.82382	Indeterminate
77	p.Thr77Asn			10090	1639	5.68553	5.54503					-4.52043	Neutral			-4.52043	Neutral
77	p.Thr77Lys			12148	2087	6.84518	7.06069					-4.4024	Neutral			-4.4024	Neutral
77	p.Thr77Thr	Synonymous		6814	757	3.83957	2.56107					-1.06151	Neutral			-1.06151	Neutral
77	p.Thr77Arg			7484	1416	4.2171	4.79058					-12.2633	Indeterminate			-12.2633	Indeterminate
77	p.Thr77Ser			8715	1463	4.91074	4.94959					-6.48282	Indeterminate			-6.48282	Indeterminate
77	p.Thr77Ile			9404	1326	5.29898	4.4861					-2.45868	Neutral			-2.45868	Neutral
77	p.Thr77Met			5988	879	3.37413	2.97381					-6.22807	Indeterminate			-6.22807	Indeterminate
77	p.Thr77His			7330	1092	4.13032	3.69443					-4.94936	Neutral			-4.94936	Neutral
77	p.Thr77Gln			8278	1295	4.6645	4.38122					-5.14317	Neutral			-5.14317	Neutral
77	p.Thr77Pro		Deleterious	7110	2118	4.00636	7.16557					-44.1052	Indeterminate			-33.2185	Indeterminate
77	p.Thr77Leu			11158	1918	6.28733	6.48894					-5.03008	Neutral			-5.03008	Neutral
77	p.Thr77Asp			4915	701	2.76951	2.37161					-7.24691	Indeterminate			-7.24691	Indeterminate
77	p.Thr77Glu			9748	2211	5.49282	7.48021					-16.5574	Indeterminate			-16.5574	Indeterminate
77	p.Thr77Ala			9298	1602	5.23925	5.41985					-6.60546	Indeterminate			-6.60546	Indeterminate
77	p.Thr77Gly			12368	1745	6.96914	5.90365					-1.41062	Neutral			-1.41062	Neutral
77	p.Thr77Val			11478	2244	6.46764	7.59185					-8.27466	Indeterminate			-8.27466	Indeterminate
77	p.Thr77Tyr			9931	1465	5.59594	4.95636					-2.85658	Neutral			-2.85658	Neutral
77	p.Thr77Cys			13304	2046	7.49656	6.92198					-2.08431	Neutral			-2.08431	Neutral
77	p.Thr77Trp			6374	853	3.59163	2.88585					-3.70231	Neutral			-3.70231	Neutral
77	p.Thr77Phe			5533	701	3.11775	2.37161					-3.56047	Neutral			-3.56047	Neutral
78	p.Leu78Asn			2675	1771	7.70738	6.33745					-0.00446599	Neutral			-0.00446599	Neutral
78	p.Leu78Lys			1995	1493	5.74812	5.34264					-0.101431	Neutral			-0.101431	Neutral
78	p.Leu78Thr			1668	1264	4.80595	4.52317					-0.223474	Neutral			-0.223474	Neutral
78	p.Leu78Arg			943	1294	2.71703	4.63052					-16.9466	Indeterminate			-16.9466	Indeterminate
78	p.Leu78Ser			1338	660	3.85513	2.36178					-0.00146288	Neutral			-0.00146288	Neutral
78	p.Leu78Ile			2099	1782	6.04777	6.37681					-0.322998	Neutral			-0.322998	Neutral
78	p.Leu78Met			1020	1289	2.93889	4.61263					-11.966	Indeterminate			-11.966	Indeterminate
78	p.Leu78His			1588	1438	4.57545	5.14582					-1.17059	Neutral			-1.17059	Neutral
78	p.Leu78Gln			1438	1676	4.14326	5.9975					-5.65565	Neutral			-5.65565	Neutral
78	p.Leu78Pro			1788	2655	5.1517	9.50081					-10.9726	Indeterminate			-10.9726	Indeterminate
78	p.Leu78Leu	Synonymous		1779	1650	5.12577	5.90446					-1.06151	Neutral			-1.06151	Neutral
78	p.Leu78Asp			5455	2299	15.7173	8.22687					-5.60567e-10	Neutral			-4.16297e-10	Neutral
78	p.Leu78Glu			1427	1642	4.11156	5.87583					-5.40621	Neutral			-5.40621	Neutral
78	p.Leu78Ala			637	727	1.83536	2.60154					-14.3217	Indeterminate			-14.3217	Indeterminate
78	p.Leu78Gly			1290	219	3.71683	0.783682					-1.1212e-15	Neutral			0	Neutral
78	p.Leu78Val			2096	1560	6.03913	5.58239					-0.0780439	Neutral			-0.0780439	Neutral
78	p.Leu78Tyr			1478	1553	4.25851	5.55734					-3.31055	Neutral			-3.31055	Neutral
78	p.Leu78Cys			1343	1282	3.86954	4.58758					-2.33172	Neutral			-2.33172	Neutral
78	p.Leu78Trp			1194	791	3.44023	2.83056					-0.174886	Neutral			-0.174886	Neutral
78	p.Leu78Phe			1456	900	4.19512	3.22061					-0.0337845	Neutral			-0.0337845	Neutral
79	p.Thr79Asn			6357	2367	6.19283	4.93886					-0.322777	Neutral			-0.322777	Neutral
79	p.Thr79Lys			4790	2080	4.6663	4.34002					-2.10046	Neutral			-2.10046	Neutral
79	p.Thr79Thr	Synonymous		7615	3475	7.41834	7.25076					-1.06151	Neutral			-1.06151	Neutral
79	p.Thr79Arg			3106	1753	3.02579	3.65772					-12.6403	Indeterminate			-12.6403	Indeterminate
79	p.Thr79Ser			5296	2013	5.15923	4.20023					-0.659761	Neutral			-0.659761	Neutral
79	p.Thr79Ile			5523	1971	5.38037	4.11259					-0.336062	Neutral			-0.336062	Neutral
79	p.Thr79Met			6304	2761	6.1412	5.76096					-1.2368	Neutral			-1.2368	Neutral
79	p.Thr79His			5309	2284	5.17189	4.76568					-1.60553	Neutral			-1.60553	Neutral
79	p.Thr79Gln			4412	1628	4.29806	3.3969					-0.842168	Neutral			-0.842168	Neutral
79	p.Thr79Pro			3460	4139	3.37064	8.63623					-53.1508	Deleterious			-53.1508	Deleterious
79	p.Thr79Leu			4103	1982	3.99704	4.13554					-4.79544	Neutral			-4.79544	Neutral
79	p.Thr79Asp			3999	1769	3.89572	3.69111					-3.25003	Neutral			-3.25003	Neutral
79	p.Thr79Glu			3681	1420	3.58594	2.9629					-1.73887	Neutral			-1.73887	Neutral
79	p.Thr79Ala			5581	2518	5.43687	5.25393					-1.9485	Neutral			-1.9485	Neutral
79	p.Thr79Gly			5518	2596	5.3755	5.41668					-2.54362	Neutral			-2.54362	Neutral
79	p.Thr79Val			8644	4107	8.42077	8.56946					-1.04831	Neutral			-1.04831	Neutral
79	p.Thr79Tyr			3452	1556	3.36285	3.24667					-4.53867	Neutral			-4.53867	Neutral
79	p.Thr79Cys			5814	2910	5.66385	6.07186					-3.23727	Neutral			-3.23727	Neutral
79	p.Thr79Trp			4719	2447	4.59713	5.10579					-5.35526	Neutral			-5.35526	Neutral
79	p.Thr79Phe			4968	2150	4.8397	4.48608					-1.91309	Neutral			-1.91309	Neutral
80	p.Arg80Asn			9628	1551	4.97137	5.34275					-17.84	Indeterminate			-17.84	Indeterminate
80	p.Arg80Lys			11473	1355	5.92403	4.66759					-4.54981	Neutral			-4.54981	Neutral
80	p.Arg80Thr			5402	616	2.7893	2.12194					-10.8589	Indeterminate			-10.8589	Indeterminate
80	p.Arg80Arg	Synonymous		13295	1283	6.86481	4.41957					-1.06151	Neutral			-1.06151	Neutral
80	p.Arg80Ser			12287	1392	6.34433	4.79504					-3.31469	Neutral			-3.31469	Neutral
80	p.Arg80Ile			7889	1862	4.07344	6.41405					-53.1508	Deleterious			-53.1508	Deleterious
80	p.Arg80Met			8839	1240	4.56397	4.27144					-12.6136	Indeterminate			-12.6136	Indeterminate
80	p.Arg80His			9521	1203	4.91612	4.14399					-7.90898	Indeterminate			-7.90898	Indeterminate
80	p.Arg80Gln			7688	1142	3.96966	3.93386					-17.5028	Indeterminate			-17.5028	Indeterminate
80	p.Arg80Pro			8976	4035	4.63471	13.8994					-53.1508	Deleterious			-53.1508	Deleterious
80	p.Arg80Leu			10680	1517	5.51456	5.22563					-10.6052	Indeterminate			-10.6052	Indeterminate
80	p.Arg80Asp			10178	1582	5.25536	5.44953					-15.1108	Indeterminate			-15.1108	Indeterminate
80	p.Arg80Glu			9465	1058	4.8872	3.64451					-4.74122	Neutral			-4.74122	Neutral
80	p.Arg80Ala			11000	1400	5.67979	4.8226					-6.71774	Indeterminate			-6.71774	Indeterminate
80	p.Arg80Gly			10632	1370	5.48978	4.71926					-7.39469	Indeterminate			-7.39469	Indeterminate
80	p.Arg80Val			8051	1272	4.15709	4.38167					-20.0513	Indeterminate			-20.0512	Indeterminate
80	p.Arg80Tyr			11274	1590	5.82127	5.47709					-9.68994	Indeterminate			-9.68994	Indeterminate
80	p.Arg80Cys			6897	589	3.56123	2.02894					-1.99502	Neutral			-1.99502	Neutral
80	p.Arg80Trp			11399	1615	5.88582	5.56321					-9.72227	Indeterminate			-9.72227	Indeterminate
80	p.Arg80Phe			9095	1358	4.69616	4.67792					-14.9773	Indeterminate			-14.9773	Indeterminate
81	p.Pro81Asn			3270	2138	4.49441	5.03331					-53.1508	Deleterious			-53.1508	Deleterious
81	p.Pro81Lys			4056	3564	5.57472	8.39042					-53.1508	Deleterious			-53.1508	Deleterious
81	p.Pro81Thr		Deleterious	3644	1370	5.00845	3.22527					-49.5406	Indeterminate			-33.2193	Indeterminate
81	p.Pro81Arg			4210	2742	5.78638	6.45526					-53.1508	Deleterious			-53.1508	Deleterious
81	p.Pro81Ser			2453	1122	3.3715	2.64143					-53.1508	Deleterious			-53.1508	Deleterious
81	p.Pro81Ile			2461	1198	3.38249	2.82035					-53.1508	Deleterious			-53.1508	Deleterious
81	p.Pro81Met			4378	2646	6.01729	6.22925					-53.1508	Deleterious			-53.1508	Deleterious
81	p.Pro81His			3889	2773	5.34519	6.52824					-53.1508	Deleterious			-53.1508	Deleterious
81	p.Pro81Gln			4314	4646	5.92933	10.9377					-53.1508	Deleterious			-53.1508	Deleterious
81	p.Pro81Pro	Synonymous		3937	545	5.41116	1.28305					-1.06151	Neutral			-1.06151	Neutral
81	p.Pro81Leu		Deleterious	2688	1382	3.69449	3.25353					-53.1508	Deleterious			-53.1508	Deleterious
81	p.Pro81Asp			3627	2528	4.98509	5.95146					-53.1508	Deleterious			-53.1508	Deleterious
81	p.Pro81Glu			3955	3393	5.4359	7.98785					-53.1508	Deleterious			-53.1508	Deleterious
81	p.Pro81Ala			2546	590	3.49932	1.38899					-20.0764	Indeterminate			-20.0762	Indeterminate
81	p.Pro81Gly			3018	1629	4.14805	3.83502					-53.1508	Deleterious			-53.1508	Deleterious
81	p.Pro81Val			3803	1377	5.22699	3.24175					-44.183	Indeterminate			-33.2186	Indeterminate
81	p.Pro81Tyr			3466	2061	4.7638	4.85204					-53.1508	Deleterious			-53.1508	Deleterious
81	p.Pro81Cys			5033	1452	6.91755	3.41832					-19.6636	Indeterminate			-19.6635	Indeterminate
81	p.Pro81Trp			4048	2847	5.56373	6.70245					-53.1508	Deleterious			-53.1508	Deleterious
81	p.Pro81Phe			3961	2474	5.44415	5.82433					-53.1508	Deleterious			-53.1508	Deleterious
82	p.Val82Asn			5118	927	3.84422	4.93715					-53.1508	Deleterious			-53.1508	Deleterious
82	p.Val82Lys			4194	977	3.15019	5.20345					-53.1508	Deleterious			-53.1508	Deleterious
82	p.Val82Thr			11017	1270	8.27506	6.76395					-8.2931	Indeterminate			-8.2931	Indeterminate
82	p.Val82Arg			8316	1978	6.24629	10.5347					-53.1508	Deleterious			-53.1508	Deleterious
82	p.Val82Ser			8583	897	6.44684	4.77738					-7.81921	Indeterminate			-7.81921	Indeterminate
82	p.Val82Ile			7271	717	5.46137	3.8187					-7.72751	Indeterminate			-7.72751	Indeterminate
82	p.Val82Met			5075	324	3.81192	1.72561					-1.58767	Neutral			-1.58767	Neutral
82	p.Val82His			8957	1689	6.72776	8.99553					-42.2858	Indeterminate			-33.2166	Indeterminate
82	p.Val82Gln			6300	686	4.73204	3.6536					-13.1059	Indeterminate			-13.1059	Indeterminate
82	p.Val82Pro			7701	1207	5.78435	6.42842					-30.6952	Indeterminate			-30.464	Indeterminate
82	p.Val82Leu			6686	586	5.02197	3.12101					-5.30169	Neutral			-5.30169	Neutral
82	p.Val82Asp			3241	694	2.43437	3.69621					-53.1508	Deleterious			-53.1508	Deleterious
82	p.Val82Glu			6491	1072	4.8755	5.70942					-39.8785	Indeterminate			-33.2051	Indeterminate
82	p.Val82Ala			8058	625	6.0525	3.32872					-2.05005	Neutral			-2.05005	Neutral
82	p.Val82Gly			4572	717	3.43411	3.8187					-46.1296	Indeterminate			-33.2191	Indeterminate
82	p.Val82Val	Synonymous		10662	821	8.00841	4.3726					-1.06151	Neutral			-1.06151	Neutral
82	p.Val82Tyr			3733	830	2.80392	4.42054					-53.1508	Deleterious			-53.1508	Deleterious
82	p.Val82Cys			4968	509	3.73155	2.71091					-13.8993	Indeterminate			-13.8993	Indeterminate
82	p.Val82Trp			4187	1143	3.14493	6.08756					-53.1508	Deleterious			-53.1508	Deleterious
82	p.Val82Phe			8005	1107	6.01269	5.89582					-21.292	Indeterminate			-21.2916	Indeterminate
83	p.His83Asn			2209	1716	5.19887	5.29924					-53.1508	Deleterious			-53.1508	Deleterious
83	p.His83Lys			2282	2477	5.37068	7.64931					-53.1508	Deleterious			-53.1508	Deleterious
83	p.His83Thr			1704	1097	4.01036	3.38768					-53.1508	Deleterious			-53.1508	Deleterious
83	p.His83Arg	Pathogenic		2229	2555	5.24594	7.89019					-53.1508	Deleterious			-53.1508	Deleterious
83	p.His83Ser			2121	1323	4.99176	4.0856					-53.1508	Deleterious			-53.1508	Deleterious
83	p.His83Ile			2239	1501	5.26948	4.63529					-53.1508	Deleterious			-53.1508	Deleterious
83	p.His83Met			1978	448	4.65521	1.38348					-30.7255	Indeterminate			-30.4897	Indeterminate
83	p.His83His	Synonymous		2145	220	5.04825	0.67939					-1.06151	Neutral			-1.06151	Neutral
83	p.His83Gln			2092	858	4.92351	2.64962					-53.1508	Deleterious			-53.1508	Deleterious
83	p.His83Pro			2039	2411	4.79878	7.44549					-53.1508	Deleterious			-53.1508	Deleterious
83	p.His83Leu			2061	1244	4.85055	3.84164					-53.1508	Deleterious			-53.1508	Deleterious
83	p.His83Asp	Likely pathogenic		1956	2148	4.60344	6.63331					-53.1508	Deleterious			-53.1508	Deleterious
83	p.His83Glu			2438	2516	5.73782	7.76975					-53.1508	Deleterious			-53.1508	Deleterious
83	p.His83Ala			2190	589	5.15415	1.81891					-42.637	Indeterminate			-33.2172	Indeterminate
83	p.His83Gly			2738	2060	6.44387	6.36156					-53.1508	Deleterious			-53.1508	Deleterious
83	p.His83Val			1653	1644	3.89033	5.07689					-53.1508	Deleterious			-53.1508	Deleterious
83	p.His83Tyr	Likely pathogenic		1726	1905	4.06213	5.8829					-53.1508	Deleterious			-53.1508	Deleterious
83	p.His83Cys			1753	1232	4.12568	3.80458					-53.1508	Deleterious			-53.1508	Deleterious
83	p.His83Trp			2279	2636	5.36361	8.14032					-53.1508	Deleterious			-53.1508	Deleterious
83	p.His83Phe			2658	1802	6.25559	5.56482					-53.1508	Deleterious			-53.1508	Deleterious
84	p.Asp84Asn	Likely pathogenic		2322	945	3.69804	3.5061					-53.1508	Deleterious			-53.1508	Deleterious
84	p.Asp84Lys			3482	2031	5.54547	7.53534					-53.1508	Deleterious			-53.1508	Deleterious
84	p.Asp84Thr			2464	1033	3.92419	3.8326					-53.1508	Deleterious			-53.1508	Deleterious
84	p.Asp84Arg			3099	1815	4.9355	6.73394					-53.1508	Deleterious			-53.1508	Deleterious
84	p.Asp84Ser			2805	443	4.46727	1.6436					-53.1508	Deleterious			-53.1508	Deleterious
84	p.Asp84Ile			3566	2122	5.67925	7.87296					-53.1508	Deleterious			-53.1508	Deleterious
84	p.Asp84Met			2901	1475	4.62016	5.47249					-53.1508	Deleterious			-53.1508	Deleterious
84	p.Asp84His		Deleterious	3544	821	5.64421	3.04604					-53.1508	Deleterious			-53.1508	Deleterious
84	p.Asp84Gln			2535	744	4.03727	2.76036					-53.1508	Deleterious			-53.1508	Deleterious
84	p.Asp84Pro			3263	1893	5.19669	7.02334					-53.1508	Deleterious			-53.1508	Deleterious
84	p.Asp84Leu			3617	2184	5.76047	8.10299					-53.1508	Deleterious			-53.1508	Deleterious
84	p.Asp84Asp	Synonymous		3069	79	4.88772	0.293103					-1.06151	Neutral			-1.06151	Neutral
84	p.Asp84Glu			2431	94	3.87164	0.348755					-11.5727	Indeterminate			-11.5727	Indeterminate
84	p.Asp84Ala		Deleterious	4167	1843	6.63641	6.83783					-53.1508	Deleterious			-53.1508	Deleterious
84	p.Asp84Gly		Deleterious	2603	1289	4.14556	4.7824					-53.1508	Deleterious			-53.1508	Deleterious
84	p.Asp84Val		Deleterious	2863	1540	4.55964	5.71365					-53.1508	Deleterious			-53.1508	Deleterious
84	p.Asp84Tyr		Deleterious	3406	1751	5.42443	6.49649					-53.1508	Deleterious			-53.1508	Deleterious
84	p.Asp84Cys			3373	512	5.37187	1.8996					-53.1508	Deleterious			-53.1508	Deleterious
84	p.Asp84Trp			3522	2243	5.60917	8.32189					-53.1508	Deleterious			-53.1508	Deleterious
84	p.Asp84Phe			3758	2096	5.98503	7.7765					-53.1508	Deleterious			-53.1508	Deleterious
85	p.Ala85Asn			5212	1526	2.81713	2.46782					-18.2593	Indeterminate			-18.2593	Indeterminate
85	p.Ala85Lys			9383	4778	5.07159	7.72689					-45.4378	Indeterminate			-33.219	Indeterminate
85	p.Ala85Thr			7427	2426	4.01436	3.92328					-17.8217	Indeterminate			-17.8217	Indeterminate
85	p.Ala85Arg			8838	4487	4.77701	7.25629					-47.1671	Indeterminate			-33.2192	Indeterminate
85	p.Ala85Ser			10574	2582	5.71534	4.17556					-3.75151	Neutral			-3.75151	Neutral
85	p.Ala85Ile			11678	4130	6.31206	6.67896					-14.3175	Indeterminate			-14.3175	Indeterminate
85	p.Ala85Met			6476	1133	3.50033	1.83227					-1.40423	Neutral			-1.40423	Neutral
85	p.Ala85His			7202	2718	3.89274	4.3955					-27.3809	Indeterminate			-27.3559	Indeterminate
85	p.Ala85Gln			8493	2892	4.59054	4.67689					-17.6653	Indeterminate			-17.6652	Indeterminate
85	p.Ala85Pro			10997	3768	5.94397	6.09354					-13.7874	Indeterminate			-13.7874	Indeterminate
85	p.Ala85Leu			10857	2524	5.8683	4.08176					-2.77351	Neutral			-2.77351	Neutral
85	p.Ala85Asp			7167	3294	3.87382	5.32699					-44.1389	Indeterminate			-33.2185	Indeterminate
85	p.Ala85Glu			7645	3405	4.13219	5.5065					-39.1361	Indeterminate			-33.1956	Indeterminate
85	p.Ala85Ala	Synonymous		15969	3621	8.63138	5.85581					-1.06151	Neutral			-1.06151	Neutral
85	p.Ala85Gly			13936	2718	7.53253	4.3955					-0.45736	Neutral			-0.45736	Neutral
85	p.Ala85Val			10776	3252	5.82452	5.25907					-9.0767	Indeterminate			-9.0767	Indeterminate
85	p.Ala85Tyr			6635	2743	3.58627	4.43593					-36.7005	Indeterminate			-33.0956	Indeterminate
85	p.Ala85Cys			9406	1933	5.08402	3.12601					-1.78294	Neutral			-1.78294	Neutral
85	p.Ala85Trp			6098	3377	3.29602	5.46122					-53.1508	Deleterious			-53.1508	Deleterious
85	p.Ala85Phe			10242	4529	5.53589	7.32421					-30.4391	Indeterminate			-30.243	Indeterminate
86	p.Ala86Asn			2738	7263	5.42232	6.87921					-53.1508	Deleterious			-53.1508	Deleterious
86	p.Ala86Lys			1712	5339	3.39043	5.05688					-53.1508	Deleterious			-53.1508	Deleterious
86	p.Ala86Thr			1173	286	2.323	0.270887					-0.0625374	Neutral			-0.0625374	Neutral
86	p.Ala86Arg			2701	8049	5.34904	7.62368					-53.1508	Deleterious			-53.1508	Deleterious
86	p.Ala86Ser			1742	753	3.44985	0.71321					-2.71111	Neutral			-2.71111	Neutral
86	p.Ala86Ile			2571	1478	5.09159	1.3999					-5.79675	Neutral			-5.79675	Indeterminate
86	p.Ala86Met			2759	6416	5.46391	6.07697					-53.1508	Deleterious			-53.1508	Deleterious
86	p.Ala86His			3907	10251	7.7374	9.70932					-53.1508	Deleterious			-53.1508	Deleterious
86	p.Ala86Gln			3641	10410	7.21061	9.85992					-53.1508	Deleterious			-53.1508	Deleterious
86	p.Ala86Pro			3199	8498	6.33528	8.04895					-53.1508	Deleterious			-53.1508	Deleterious
86	p.Ala86Leu			3102	7242	6.14318	6.85932					-53.1508	Deleterious			-53.1508	Deleterious
86	p.Ala86Asp			2882	7986	5.7075	7.564					-53.1508	Deleterious			-53.1508	Deleterious
86	p.Ala86Glu			3145	8838	6.22834	8.37098					-53.1508	Deleterious			-53.1508	Deleterious
86	p.Ala86Ala	Synonymous		986	304	1.95267	0.287936					-1.06151	Neutral			-1.06151	Neutral
86	p.Ala86Gly			1964	522	3.88949	0.494417					-0.019767	Neutral			-0.019767	Neutral
86	p.Ala86Val			2113	649	4.18457	0.614706					-0.0964476	Neutral			-0.0964476	Neutral
86	p.Ala86Tyr			2032	5898	4.02416	5.58634					-53.1508	Deleterious			-53.1508	Deleterious
86	p.Ala86Cys			2481	507	4.91336	0.480209					-3.99764e-05	Neutral			-3.99762e-05	Neutral
86	p.Ala86Trp			2661	6920	5.26983	6.55433					-53.1508	Deleterious			-53.1508	Deleterious
86	p.Ala86Phe			2986	7970	5.91346	7.54885					-53.1508	Deleterious			-53.1508	Deleterious
87	p.Arg87Asn			7612	236	5.7175	1.25692					-3.50509	Neutral			-3.50509	Neutral
87	p.Arg87Lys			3377	37	2.53652	0.19706					-0.000752822	Neutral			-0.000752822	Neutral
87	p.Arg87Thr			4254	127	3.19525	0.676395					-7.09026	Indeterminate			-7.09026	Indeterminate
87	p.Arg87Arg	Synonymous		5869	137	5.15806	1.03295					-1.06151	Neutral			-1.06151	Neutral
87	p.Arg87Ser			3450	208	2.59135	1.1078					-53.1508	Deleterious			-53.1508	Deleterious
87	p.Arg87Ile			4046	129	3.03902	0.687047					-9.72982	Indeterminate			-9.72982	Indeterminate
87	p.Arg87Met			7168	345	5.38401	1.83745					-19.9183	Indeterminate			-19.9181	Indeterminate
87	p.Arg87His			4551	247	3.41833	1.31551					-39.9132	Indeterminate			-33.2054	Indeterminate
87	p.Arg87Gln			7646	452	5.74304	2.40733					-32.466	Indeterminate			-31.794	Indeterminate
87	p.Arg87Pro	Pathogenic		3416	3365	2.56582	17.9218					-53.1508	Deleterious			-53.1508	Deleterious
87	p.Arg87Leu			4276	160	3.21178	0.852152					-15.6719	Indeterminate			-15.6719	Indeterminate
87	p.Arg87Asp			4569	777	3.43185	4.13826					-53.1508	Deleterious			-53.1508	Deleterious
87	p.Arg87Glu			6786	626	5.09708	3.33404					-53.1508	Deleterious			-53.1508	Deleterious
87	p.Arg87Ala			7639	562	5.73778	2.99318					-53	Indeterminate			-33.2193	Indeterminate
87	p.Arg87Gly			5541	127	4.16194	0.676395					-1.06773	Neutral			-1.06773	Neutral
87	p.Arg87Val			6100	198	4.58182	1.05454					-6.1054	Indeterminate			-6.1054	Indeterminate
87	p.Arg87Tyr			2406	123	1.80719	0.655092					-53.1508	Deleterious			-53.1508	Deleterious
87	p.Arg87Cys			8971	188	6.73827	1.00128					-0.106139	Neutral			-0.106139	Neutral
87	p.Arg87Trp	Likely pathogenic		8616	4952	6.47163	26.3741					-53.1508	Deleterious			-53.1508	Deleterious
87	p.Arg87Phe			7490	267	5.62587	1.42203					-6.793	Indeterminate			-6.793	Indeterminate
88	p.Glu88Asn			7680	5284	4.42463	4.15255					-8.96147	Indeterminate			-8.96147	Indeterminate
88	p.Glu88Lys		Deleterious	9106	9400	5.24618	7.38721					-26.5614	Indeterminate			-26.5472	Indeterminate
88	p.Glu88Thr			5283	3622	3.04366	2.84643					-13.656	Indeterminate			-13.656	Indeterminate
88	p.Glu88Arg			9435	9436	5.43572	7.4155					-23.6544	Indeterminate			-23.6525	Indeterminate
88	p.Glu88Ser			6793	4359	3.9136	3.42562					-8.02392	Indeterminate			-8.02392	Indeterminate
88	p.Glu88Ile			7738	4822	4.45804	3.78948					-5.96787	Indeterminate			-5.96787	Indeterminate
88	p.Glu88Met			9862	6110	5.68173	4.80168					-4.02341	Neutral			-4.02341	Neutral
88	p.Glu88His			6938	5151	3.99714	4.04803					-13.1792	Indeterminate			-13.1792	Indeterminate
88	p.Glu88Gln			7089	4779	4.08414	3.75569					-9.17172	Indeterminate			-9.17172	Indeterminate
88	p.Glu88Pro			6230	10321	3.58925	8.111					-53.1508	Deleterious			-53.1508	Deleterious
88	p.Glu88Leu			7368	5329	4.24488	4.18792					-11.276	Indeterminate			-11.276	Indeterminate
88	p.Glu88Asp			8787	6308	5.06239	4.95729					-8.8867	Indeterminate			-8.8867	Indeterminate
88	p.Glu88Glu	Synonymous		12109	6412	6.97628	5.03902					-1.06151	Neutral			-1.06151	Neutral
88	p.Glu88Ala			6884	3920	3.96603	3.08062					-4.75012	Neutral			-4.75012	Neutral
88	p.Glu88Gly			8821	5602	5.08198	4.40246					-5.36182	Neutral			-5.36182	Neutral
88	p.Glu88Val			16505	11466	9.50891	9.01082					-3.01708	Neutral			-3.01708	Neutral
88	p.Glu88Tyr			9528	6744	5.4893	5.29993					-7.58663	Indeterminate			-7.58663	Indeterminate
88	p.Glu88Cys			8363	5109	4.81812	4.01503					-4.8755	Neutral			-4.8755	Neutral
88	p.Glu88Trp			10256	6510	5.90872	5.11603					-4.24749	Neutral			-4.24749	Neutral
88	p.Glu88Phe			8799	6563	5.06931	5.15769					-10.2099	Indeterminate			-10.2099	Indeterminate
89	p.Gly89Asn			2627	478	3.59873	0.668999					-16.9707	Indeterminate			-16.9707	Indeterminate
89	p.Gly89Lys			4247	3480	5.81797	4.87054					-53.1508	Deleterious			-53.1508	Deleterious
89	p.Gly89Thr			3807	5129	5.21521	7.17845					-53.1508	Deleterious			-53.1508	Deleterious
89	p.Gly89Arg			3355	3087	4.59602	4.3205					-53.1508	Deleterious			-53.1508	Deleterious
89	p.Gly89Ser			3824	1590	5.2385	2.22533					-53.1508	Deleterious			-53.1508	Deleterious
89	p.Gly89Ile			3356	5608	4.59739	7.84885					-53.1508	Deleterious			-53.1508	Deleterious
89	p.Gly89Met			3081	3692	4.22066	5.16725					-53.1508	Deleterious			-53.1508	Deleterious
89	p.Gly89His			3103	3096	4.2508	4.3331					-53.1508	Deleterious			-53.1508	Deleterious
89	p.Gly89Gln			3330	2815	4.56177	3.93982					-53.1508	Deleterious			-53.1508	Deleterious
89	p.Gly89Pro			4288	4970	5.87413	6.95591					-53.1508	Deleterious			-53.1508	Deleterious
89	p.Gly89Leu			3791	5275	5.19329	7.38279					-53.1508	Deleterious			-53.1508	Deleterious
89	p.Gly89Asp		Deleterious	3504	1266	4.80013	1.77187					-53.1508	Deleterious			-53.1508	Deleterious
89	p.Gly89Glu			4701	4959	6.4399	6.94052					-53.1508	Deleterious			-53.1508	Deleterious
89	p.Gly89Ala			2968	631	4.06586	0.883135					-23.6112	Indeterminate			-23.6094	Indeterminate
89	p.Gly89Gly	Synonymous		2868	294	3.92887	0.411477					-1.06151	Neutral			-1.06151	Neutral
89	p.Gly89Val			3667	5622	5.02343	7.86844					-53.1508	Deleterious			-53.1508	Deleterious
89	p.Gly89Tyr			3624	5208	4.96452	7.28901					-53.1508	Deleterious			-53.1508	Deleterious
89	p.Gly89Cys			4087	1699	5.59878	2.37789					-53.1508	Deleterious			-53.1508	Deleterious
89	p.Gly89Trp			4212	6145	5.77002	8.60042					-53.1508	Deleterious			-53.1508	Deleterious
89	p.Gly89Phe			4558	6406	6.24401	8.96571					-53.1508	Deleterious			-53.1508	Deleterious
90	p.Phe90Asn			17215	3468	7.18894	6.32801					-0.07654	Neutral			-0.07654	Neutral
90	p.Phe90Lys			12298	3370	5.13561	6.14919					-2.62759	Neutral			-2.62759	Neutral
90	p.Phe90Thr			8757	2286	3.6569	4.17123					-3.68718	Neutral			-3.68718	Neutral
90	p.Phe90Arg			14675	3186	6.12824	5.81344					-0.308202	Neutral			-0.308202	Neutral
90	p.Phe90Ser			12195	2607	5.0926	4.75695					-0.470469	Neutral			-0.470469	Neutral
90	p.Phe90Ile			9858	1941	4.11668	3.54171					-0.424382	Neutral			-0.424382	Neutral
90	p.Phe90Met			9884	1676	4.12753	3.05817					-0.0884661	Neutral			-0.0884661	Neutral
90	p.Phe90His			9400	1661	3.92542	3.0308					-0.170817	Neutral			-0.170817	Neutral
90	p.Phe90Gln			11418	1955	4.76813	3.56726					-0.0550687	Neutral			-0.0550687	Neutral
90	p.Phe90Pro			13543	4974	5.65552	9.07598					-8.66497	Indeterminate			-8.66497	Indeterminate
90	p.Phe90Leu			12336	2179	5.15148	3.97599					-0.0590504	Neutral			-0.0590504	Neutral
90	p.Phe90Asp			8808	3457	3.6782	6.30793					-17.5116	Indeterminate			-17.5115	Indeterminate
90	p.Phe90Glu			12532	3273	5.23333	5.97219					-1.91472	Neutral			-1.91472	Neutral
90	p.Phe90Ala			9217	1762	3.849	3.21509					-0.397642	Neutral			-0.397642	Neutral
90	p.Phe90Gly			12639	2896	5.27802	5.28429					-0.758297	Neutral			-0.758297	Neutral
90	p.Phe90Val			12878	3230	5.37782	5.89373					-1.39549	Neutral			-1.39549	Neutral
90	p.Phe90Tyr			13813	2502	5.76828	4.56536					-0.0503415	Neutral			-0.0503415	Neutral
90	p.Phe90Cys			14267	3205	5.95786	5.84811					-0.460146	Neutral			-0.460146	Neutral
90	p.Phe90Trp			13085	2766	5.46426	5.04708					-0.343463	Neutral			-0.343463	Neutral
90	p.Phe90Phe	Synonymous		10647	2410	4.44616	4.39749					-1.06151	Neutral			-1.06151	Neutral
91	p.Leu91Asn			8432	493	5.01239	2.36179					-0.0201779	Neutral			-0.0201779	Neutral
91	p.Leu91Lys			7857	938	4.67059	4.49363					-7.33936	Indeterminate			-7.33936	Indeterminate
91	p.Leu91Thr			7096	862	4.21821	4.12954					-8.94941	Indeterminate			-8.94941	Indeterminate
91	p.Leu91Arg			10604	1024	6.30354	4.90562					-1.49464	Neutral			-1.49464	Neutral
91	p.Leu91Ser			8848	1433	5.25969	6.865					-18.2388	Indeterminate			-18.2387	Indeterminate
91	p.Leu91Ile			5518	782	3.28017	3.74629					-19.5255	Indeterminate			-19.5254	Indeterminate
91	p.Leu91Met			9789	2126	5.81906	10.1849					-36.2353	Indeterminate			-33.0511	Indeterminate
91	p.Leu91His			6249	874	3.71471	4.18703					-16.6071	Indeterminate			-16.6071	Indeterminate
91	p.Leu91Gln			7540	500	4.48215	2.39532					-0.159151	Neutral			-0.159151	Neutral
91	p.Leu91Pro			9411	1199	5.59436	5.74399					-7.4899	Indeterminate			-7.4899	Indeterminate
91	p.Leu91Leu	Synonymous		7934	662	4.71636	3.17141					-1.06151	Neutral			-1.06151	Neutral
91	p.Leu91Asp			6698	730	3.98162	3.49717					-6.27579	Indeterminate			-6.27579	Indeterminate
91	p.Leu91Glu			8804	987	5.23353	4.72837					-4.76325	Neutral			-4.76325	Neutral
91	p.Leu91Ala			8686	744	5.16338	3.56424					-1.03239	Neutral			-1.03239	Neutral
91	p.Leu91Gly			9719	1125	5.77745	5.38948					-4.74477	Neutral			-4.74477	Neutral
91	p.Leu91Val			11061	1191	6.5752	5.70566					-2.64842	Neutral			-2.64842	Neutral
91	p.Leu91Tyr			5704	1472	3.39074	7.05183					-53.1508	Deleterious			-53.1508	Deleterious
91	p.Leu91Cys			8443	679	5.01893	3.25285					-0.685459	Neutral			-0.685459	Neutral
91	p.Leu91Trp			10058	1333	5.97897	6.38593					-8.01946	Indeterminate			-8.01946	Indeterminate
91	p.Leu91Phe			9772	1720	5.80896	8.23992					-21.0876	Indeterminate			-21.0873	Indeterminate
92	p.Asp92Asn			3059	1748	3.60582	3.57977					-3.33641	Neutral			-3.33641	Neutral
92	p.Asp92Lys			2980	1988	3.5127	4.07127					-7.04567	Indeterminate			-7.04567	Indeterminate
92	p.Asp92Thr			3372	1636	3.97477	3.3504					-1.00055	Neutral			-1.00055	Neutral
92	p.Asp92Arg			5018	2780	5.91501	5.69322					-1.00542	Neutral			-1.00542	Neutral
92	p.Asp92Ser			2101	1098	2.47657	2.24862					-3.98629	Neutral			-3.98629	Neutral
92	p.Asp92Ile			5343	3437	6.29811	7.03871					-2.31715	Neutral			-2.31715	Neutral
92	p.Asp92Met			5318	2816	6.26864	5.76695					-0.609019	Neutral			-0.609019	Neutral
92	p.Asp92His			2930	1735	3.45376	3.55314					-4.27507	Neutral			-4.27507	Neutral
92	p.Asp92Gln			5536	3118	6.52561	6.38542					-0.892134	Neutral			-0.892134	Neutral
92	p.Asp92Pro			5268	3172	6.2097	6.49601					-1.59344	Neutral			-1.59344	Neutral
92	p.Asp92Leu			6269	3445	7.38964	7.05509					-0.525409	Neutral			-0.525409	Neutral
92	p.Asp92Asp	Synonymous		4573	2475	5.39046	5.06861					-1.06151	Neutral			-1.06151	Neutral
92	p.Asp92Glu			3137	1867	3.69777	3.82347					-3.92584	Neutral			-3.92584	Neutral
92	p.Asp92Ala			6689	4069	7.88472	8.33299					-0.991296	Neutral			-0.991296	Neutral
92	p.Asp92Gly			3137	1980	3.69777	4.05488					-5.17248	Neutral			-5.17248	Neutral
92	p.Asp92Val			5507	3063	6.49142	6.27278					-0.821747	Neutral			-0.821747	Neutral
92	p.Asp92Tyr			2568	1440	3.02705	2.94901					-4.06048	Neutral			-4.06048	Neutral
92	p.Asp92Cys			5479	2909	6.45842	5.9574					-0.573381	Neutral			-0.573381	Neutral
92	p.Asp92Trp			2854	1628	3.36418	3.33402					-3.71711	Neutral			-3.71711	Neutral
92	p.Asp92Phe			3697	2426	4.35787	4.96826					-4.81752	Neutral			-4.81752	Neutral
93	p.Thr93Asn			12872	1136	4.39329	3.41428					-16.5146	Indeterminate			-16.5146	Indeterminate
93	p.Thr93Lys			10656	1950	3.63696	5.86078					-53.1508	Deleterious			-53.1508	Deleterious
93	p.Thr93Thr	Synonymous		12435	599	4.24414	1.80031					-1.06151	Neutral			-1.06151	Neutral
93	p.Thr93Arg			12522	1486	4.27384	4.46622					-37.3156	Indeterminate			-33.1373	Indeterminate
93	p.Thr93Ser			11324	798	3.86495	2.39841					-8.91031	Indeterminate			-8.91031	Indeterminate
93	p.Thr93Ile			13017	614	4.44278	1.8454					-0.810524	Neutral			-0.810524	Neutral
93	p.Thr93Met			14173	1206	4.83733	3.62467					-13.2942	Indeterminate			-13.2942	Indeterminate
93	p.Thr93His			19146	2259	6.53465	6.78949					-25.8943	Indeterminate			-25.8853	Indeterminate
93	p.Thr93Gln			17574	1861	5.99812	5.59329					-20.8256	Indeterminate			-20.8254	Indeterminate
93	p.Thr93Pro			18332	5525	6.25683	16.6056					-53.1508	Deleterious			-53.1508	Deleterious
93	p.Thr93Leu			15110	1179	5.15714	3.54352					-9.11594	Indeterminate			-9.11594	Indeterminate
93	p.Thr93Asp			11110	1576	3.79191	4.73672					-53.1508	Deleterious			-53.1508	Deleterious
93	p.Thr93Glu			5928	693	2.02326	2.08283					-53.1508	Deleterious			-53.1508	Deleterious
93	p.Thr93Ala			18371	2050	6.27014	6.16134					-23.1273	Indeterminate			-23.126	Indeterminate
93	p.Thr93Gly			21093	2490	7.19917	7.48377					-23.7917	Indeterminate			-23.7897	Indeterminate
93	p.Thr93Val			14806	1033	5.05338	3.10471					-5.99259	Indeterminate			-5.99259	Indeterminate
93	p.Thr93Tyr			15176	2095	5.17966	6.29659					-45.5488	Indeterminate			-33.219	Indeterminate
93	p.Thr93Cys			14861	1164	5.07215	3.49844					-9.43648	Indeterminate			-9.43648	Indeterminate
93	p.Thr93Trp			16976	1890	5.79401	5.68045					-24.6766	Indeterminate			-24.6727	Indeterminate
93	p.Thr93Phe			17510	1668	5.97627	5.01322					-15.2465	Indeterminate			-15.2465	Indeterminate
94	p.Leu94Asn			1461	780	4.06624	2.19811					-34.3863	Indeterminate			-32.6879	Indeterminate
94	p.Leu94Lys			2375	3419	6.61008	9.63506					-53.1508	Deleterious			-53.1508	Deleterious
94	p.Leu94Thr			1880	1076	5.2324	3.03227					-33.2244	Indeterminate			-32.2218	Indeterminate
94	p.Leu94Arg			2092	3934	5.82243	11.0864					-53.1508	Deleterious			-53.1508	Deleterious
94	p.Leu94Ser			1901	421	5.29084	1.18642					-0.470002	Neutral			-0.470002	Neutral
94	p.Leu94Ile			1867	295	5.19621	0.831337					-0.00836018	Neutral			-0.00836018	Neutral
94	p.Leu94Met			432	42	1.20234	0.11836					-0.00841261	Neutral			-0.00841261	Neutral
94	p.Leu94His			1805	3659	5.02366	10.3114					-53.1508	Deleterious			-53.1508	Deleterious
94	p.Leu94Gln	Likely pathogenic		1288	1435	3.58475	4.04396					-53.1508	Deleterious			-53.1508	Deleterious
94	p.Leu94Pro	Likely pathogenic		2142	2900	5.96159	8.17247					-53.1508	Deleterious			-53.1508	Deleterious
94	p.Leu94Leu	Synonymous		1575	363	4.38352	1.02297					-1.06151	Neutral			-1.06151	Neutral
94	p.Leu94Asp			2051	3654	5.70832	10.2973					-53.1508	Deleterious			-53.1508	Deleterious
94	p.Leu94Glu			2084	2145	5.80017	6.04481					-53.1508	Deleterious			-53.1508	Deleterious
94	p.Leu94Ala			946	501	2.6329	1.41186					-47.0227	Indeterminate			-33.2192	Indeterminate
94	p.Leu94Gly			1187	1220	3.30365	3.43807					-53.1508	Deleterious			-53.1508	Deleterious
94	p.Leu94Val			1555	436	4.32786	1.22869					-3.55535	Neutral			-3.55535	Neutral
94	p.Leu94Tyr			1270	2783	3.53465	7.84275					-53.1508	Deleterious			-53.1508	Deleterious
94	p.Leu94Cys			2850	1202	7.93209	3.38735					-8.77125	Indeterminate			-8.77125	Indeterminate
94	p.Leu94Trp			2406	4027	6.69635	11.3485					-53.1508	Deleterious			-53.1508	Deleterious
94	p.Leu94Phe			2763	1193	7.68995	3.36198					-9.93755	Indeterminate			-9.93755	Indeterminate
95	p.Val95Asn			7232	2182	3.02007	3.98146					-4.64476	Neutral			-4.64476	Neutral
95	p.Val95Lys			10963	2844	4.57812	5.1894					-0.825482	Neutral			-0.825482	Neutral
95	p.Val95Thr			5808	1609	2.42541	2.93592					-4.37941	Neutral			-4.37941	Neutral
95	p.Val95Arg			9203	2809	3.84315	5.12554					-3.32042	Neutral			-3.32042	Neutral
95	p.Val95Ser			6861	2066	2.86514	3.7698					-4.98823	Neutral			-4.98823	Neutral
95	p.Val95Ile			8681	2394	3.62516	4.36829					-2.10692	Neutral			-2.10692	Neutral
95	p.Val95Met			4894	1367	2.04372	2.49434					-5.87616	Indeterminate			-5.87616	Indeterminate
95	p.Val95His			7829	1699	3.26937	3.10014					-0.477764	Neutral			-0.477764	Neutral
95	p.Val95Gln			2718	740	1.13503	1.35027					-11.3088	Indeterminate			-11.3088	Indeterminate
95	p.Val95Pro			5472	7300	2.28509	13.3202					-53.1508	Deleterious			-53.1508	Deleterious
95	p.Val95Leu			5183	1187	2.16441	2.1659					-1.9307	Neutral			-1.9307	Neutral
95	p.Val95Asp			7731	2073	3.22845	3.78257					-2.24013	Neutral			-2.24013	Neutral
95	p.Val95Glu			7407	2177	3.09315	3.97234					-3.94643	Neutral			-3.94643	Neutral
95	p.Val95Ala			6406	1317	2.67513	2.40311					-0.532406	Neutral			-0.532406	Neutral
95	p.Val95Gly			9626	2766	4.01979	5.04708					-2.19313	Neutral			-2.19313	Neutral
95	p.Val95Val	Synonymous		12313	3434	5.14188	6.26597					-1.06151	Neutral			-1.06151	Neutral
95	p.Val95Tyr			5221	1479	2.18028	2.69871					-5.69063	Neutral			-5.69063	Neutral
95	p.Val95Cys			6989	1603	2.91859	2.92497					-1.00553	Neutral			-1.00553	Neutral
95	p.Val95Trp			6758	2279	2.82212	4.15846					-8.18324	Indeterminate			-8.18324	Indeterminate
95	p.Val95Phe			5986	1846	2.49974	3.36837					-6.72712	Indeterminate			-6.72712	Indeterminate
96	p.Val96Asn			3048	665	5.44023	4.93031	5216	4257	5.12866	6.03068	-0.25991	Neutral	-7.47422	Indeterminate	-5.0649	Neutral
96	p.Val96Lys			4337	1119	7.74091	8.29626	7262	4566	7.1404	6.46843	-0.4196	Neutral	-1.02601	Neutral	-0.444153	Neutral
96	p.Val96Thr			3524	706	6.28982	5.23428	5839	3601	5.74123	5.10136	-0.0573621	Neutral	-1.48078	Neutral	-0.491189	Neutral
96	p.Val96Arg			4400	1080	7.85336	8.00712	8595	5833	8.45108	8.26333	-0.249487	Neutral	-1.18653	Neutral	-0.439361	Neutral
96	p.Val96Ser			3519	765	6.2809	5.67171	6849	3584	6.73431	5.07728	-0.151978	Neutral	-0.251846	Neutral	-0.0477824	Neutral
96	p.Val96Ile			1854	453	3.30912	3.35854	3334	2258	3.27817	3.1988	-2.20613	Neutral	-6.40278	Neutral	-5.80832	Indeterminate
96	p.Val96Met			2021	408	3.60719	3.02491	4039	2200	3.97137	3.11663	-0.451619	Neutral	-1.4633	Neutral	-0.696248	Neutral
96	p.Val96His			1796	486	3.2056	3.6032	3759	2299	3.69606	3.25688	-4.0254	Neutral	-3.31013	Neutral	-4.73037	Neutral
96	p.Val96Gln			2870	711	5.12253	5.27135	5857	4319	5.75893	6.11852	-0.925814	Neutral	-4.04154	Neutral	-2.81578	Neutral
96	p.Val96Pro			2688	727	4.79769	5.38998	6159	3568	6.05587	5.05461	-1.9372	Neutral	-0.837792	Neutral	-1.22731	Neutral
96	p.Val96Leu			1684	426	3.00569	3.15836	3163	2563	3.11004	3.63088	-3.19128	Neutral	-13.2693	Indeterminate	-12.8272	Indeterminate
96	p.Val96Asp			2748	651	4.90478	4.82651	3473	2913	3.41485	4.12671	-0.733578	Neutral	-13.4207	Indeterminate	-10.7199	Indeterminate
96	p.Val96Glu			3956	740	7.06088	5.48636	6847	4820	6.73235	6.82826	-0.0128642	Neutral	-2.40873	Neutral	-1.00016	Neutral
96	p.Val96Ala			1027	328	1.83304	2.43179	1739	1778	1.70988	2.51881	-15.6519	Indeterminate	-42.5395	Indeterminate	-53.1508	Deleterious
96	p.Val96Gly			2331	764	4.16049	5.66429	4461	2549	4.3863	3.61104	-6.46164	Indeterminate	-1.61193	Neutral	-5.35194	Neutral
96	p.Val96Val	Synonymous		4346	1259	7.75697	9.33422	8569	5719	8.42551	8.10183	-1.06151	Neutral	-1.06151	Neutral	-0.81759	Neutral
96	p.Val96Tyr			1651	394	2.94679	2.92112	3353	2410	3.29685	3.41413	-2.40513	Neutral	-8.07472	Indeterminate	-7.43299	Indeterminate
96	p.Val96Cys			3437	820	6.13454	6.07948	5233	4773	5.14537	6.76168	-0.415578	Neutral	-11.2503	Indeterminate	-8.48223	Indeterminate
96	p.Val96Trp			2216	450	3.95524	3.3363	3357	3261	3.30079	4.6197	-0.360829	Neutral	-21.6439	Indeterminate	-17.9817	Indeterminate
96	p.Val96Phe			2574	536	4.59421	3.9739	4599	3318	4.52199	4.70045	-0.285414	Neutral	-5.304	Neutral	-3.30422	Neutral
97	p.Leu97Asn			2906	1928	3.96534	5.52958					-53.1508	Deleterious			-53.1508	Deleterious
97	p.Leu97Lys			5234	3867	7.14198	11.0907					-53.1508	Deleterious			-53.1508	Deleterious
97	p.Leu97Thr			2517	1324	3.43454	3.79729					-53.1508	Deleterious			-53.1508	Deleterious
97	p.Leu97Arg		Deleterious	3861	2940	5.26847	8.43204					-53.1508	Deleterious			-53.1508	Deleterious
97	p.Leu97Ser			5025	3430	6.85679	9.83738					-53.1508	Deleterious			-53.1508	Deleterious
97	p.Leu97Ile			3028	229	4.13181	0.656781					-0.263869	Neutral			-0.263869	Neutral
97	p.Leu97Met			2875	178	3.92304	0.510511					-0.0303429	Neutral			-0.0303429	Neutral
97	p.Leu97His			2448	1356	3.34038	3.88906					-53.1508	Deleterious			-53.1508	Deleterious
97	p.Leu97Gln			3798	1421	5.18251	4.07549					-53.1508	Deleterious			-53.1508	Deleterious
97	p.Leu97Pro			2652	2066	3.61875	5.92537					-53.1508	Deleterious			-53.1508	Deleterious
97	p.Leu97Leu	Synonymous		3046	272	4.15638	0.780107					-1.06151	Neutral			-1.06151	Neutral
97	p.Leu97Asp			4997	3900	6.81858	11.1854					-53.1508	Deleterious			-53.1508	Deleterious
97	p.Leu97Glu			4583	2785	6.25367	7.9875					-53.1508	Deleterious			-53.1508	Deleterious
97	p.Leu97Ala			3439	1472	4.69264	4.22176					-53.1508	Deleterious			-53.1508	Deleterious
97	p.Leu97Gly			4508	3527	6.15133	10.1156					-53.1508	Deleterious			-53.1508	Deleterious
97	p.Leu97Val			3310	497	4.51661	1.42542					-11.8853	Indeterminate			-11.8853	Indeterminate
97	p.Leu97Tyr			3469	313	4.73357	0.897697					-0.831866	Neutral			-0.831866	Neutral
97	p.Leu97Cys			3690	339	5.03514	0.972266					-0.816216	Neutral			-0.816216	Neutral
97	p.Leu97Trp			4586	2750	6.25776	7.88711					-53.1508	Deleterious			-53.1508	Deleterious
97	p.Leu97Phe			3313	273	4.52071	0.782975					-0.446167	Neutral			-0.446167	Neutral
98	p.His98Asn			6962	3204	5.22504	4.40031					-0.6686	Neutral			-0.6686	Neutral
98	p.His98Lys			3696	1535	2.77388	2.10814					-1.46786	Neutral			-1.46786	Neutral
98	p.His98Thr			4272	2069	3.20617	2.84153					-2.76757	Neutral			-2.76757	Neutral
98	p.His98Arg			7635	3456	5.73013	4.74641					-0.448114	Neutral			-0.448114	Neutral
98	p.His98Ser			6500	3794	4.87831	5.21061					-3.54929	Neutral			-3.54929	Neutral
98	p.His98Ile			6867	3037	5.15374	4.17096					-0.497762	Neutral			-0.497762	Neutral
98	p.His98Met			5455	2395	4.09402	3.28925					-0.871958	Neutral			-0.871958	Neutral
98	p.His98His	Synonymous		5527	2503	4.14806	3.43757					-1.06151	Neutral			-1.06151	Neutral
98	p.His98Gln			4315	2331	3.23844	3.20135					-4.71409	Neutral			-4.71409	Neutral
98	p.His98Pro		Deleterious	4682	11420	3.51388	15.684					-53.1508	Deleterious			-53.1508	Deleterious
98	p.His98Leu			5788	3026	4.34394	4.15585					-2.41521	Neutral			-2.41521	Neutral
98	p.His98Asp			5699	3256	4.27715	4.47173					-3.96515	Neutral			-3.96515	Neutral
98	p.His98Glu			8665	4094	6.50316	5.62262					-0.451459	Neutral			-0.451459	Neutral
98	p.His98Ala			8015	3389	6.01533	4.65439					-0.198655	Neutral			-0.198655	Neutral
98	p.His98Gly			5917	3101	4.44076	4.25885					-2.34865	Neutral			-2.34865	Neutral
98	p.His98Val			12966	6294	9.73109	8.64406					-0.15756	Neutral			-0.15756	Neutral
98	p.His98Tyr			8668	4200	6.50541	5.7682					-0.560878	Neutral			-0.560878	Neutral
98	p.His98Cys			7543	3723	5.66109	5.1131					-0.935978	Neutral			-0.935978	Neutral
98	p.His98Trp			7222	3059	5.42017	4.20117					-0.286795	Neutral			-0.286795	Neutral
98	p.His98Phe			6849	2927	5.14023	4.01989					-0.369033	Neutral			-0.369033	Neutral
99	p.Arg99Asn			2603	447	5.57543	2.3181					-8.75881	Indeterminate			-8.75881	Indeterminate
99	p.Arg99Lys			2018	299	4.3224	1.55059					-6.836	Indeterminate			-6.836	Indeterminate
99	p.Arg99Thr			1591	288	3.4078	1.49354					-18.0305	Indeterminate			-18.0304	Indeterminate
99	p.Arg99Arg	Synonymous		3293	407	7.05336	2.11067					-1.06151	Neutral			-1.06151	Neutral
99	p.Arg99Ser			2572	463	5.50903	2.40108					-10.5606	Indeterminate			-10.5606	Indeterminate
99	p.Arg99Ile			2237	347	4.79148	1.79951					-7.16735	Indeterminate			-7.16735	Indeterminate
99	p.Arg99Met			2430	480	5.20488	2.48924					-15.3228	Indeterminate			-15.3228	Indeterminate
99	p.Arg99His			2305	267	4.93713	1.38464					-1.53223	Neutral			-1.53223	Neutral
99	p.Arg99Gln			1726	197	3.69696	1.02163					-2.50745	Neutral			-2.50745	Neutral
99	p.Arg99Pro	Likely pathogenic		2397	11387	5.13419	59.052					-53.1508	Deleterious			-53.1508	Deleterious
99	p.Arg99Leu			1736	369	3.71838	1.9136					-26.0499	Indeterminate			-26.0399	Indeterminate
99	p.Arg99Asp			1995	474	4.27314	2.45812					-30.7895	Indeterminate			-30.5439	Indeterminate
99	p.Arg99Glu			2272	392	4.86645	2.03288					-10.5136	Indeterminate			-10.5136	Indeterminate
99	p.Arg99Ala			2818	806	6.03594	4.17985					-36.5725	Indeterminate			-33.0846	Indeterminate
99	p.Arg99Gly		Neutral	3322	420	7.11547	2.17808					-1.22054	Neutral			-1.22054	Neutral
99	p.Arg99Val			1847	518	3.95613	2.6863					-48.0931	Indeterminate			-33.2192	Indeterminate
99	p.Arg99Tyr			2348	308	5.02924	1.59726					-3.06859	Neutral			-3.06859	Neutral
99	p.Arg99Cys			2310	505	4.94784	2.61889					-21.7351	Indeterminate			-21.7346	Indeterminate
99	p.Arg99Trp			2612	591	5.59471	3.06488					-21.3482	Indeterminate			-21.3478	Indeterminate
99	p.Arg99Phe			2255	318	4.83004	1.64912					-4.69377	Neutral			-4.69377	Neutral
100	p.Ala100Asn			3418	332	2.32539	1.27707					-1.08019	Neutral			-1.08019	Neutral
100	p.Ala100Lys			13759	1148	9.36076	4.41589					-0.000354441	Neutral			-0.00035444	Neutral
100	p.Ala100Thr			5473	648	3.72348	2.4926					-1.43931	Neutral			-1.43931	Neutral
100	p.Ala100Arg			14131	1152	9.61384	4.43128					-0.000187042	Neutral			-0.000187041	Neutral
100	p.Ala100Ser	Likely benign		3813	249	2.59412	0.957803					-0.00877295	Neutral			-0.00877295	Neutral
100	p.Ala100Ile			6693	620	4.55349	2.38489					-0.0843269	Neutral			-0.0843269	Neutral
100	p.Ala100Met			14631	1686	9.95401	6.48536					-0.0501977	Neutral			-0.0501977	Neutral
100	p.Ala100His			7412	516	5.04266	1.98484					-0.000567986	Neutral			-0.000567986	Neutral
100	p.Ala100Gln			6694	604	4.55418	2.32335					-0.060883	Neutral			-0.060883	Neutral
100	p.Ala100Pro		Deleterious	10531	12616	7.16463	48.5287					-53.1508	Deleterious			-53.1508	Deleterious
100	p.Ala100Leu			6791	525	4.62017	2.01946					-0.0060813	Neutral			-0.0060813	Neutral
100	p.Ala100Asp			1017	66	0.691903	0.253875					-1.07442	Neutral			-1.07442	Neutral
100	p.Ala100Glu			7528	1165	5.12158	4.48129					-3.6597	Neutral			-3.6597	Neutral
100	p.Ala100Ala	Synonymous		2608	231	1.77432	0.888564					-1.06151	Neutral			-1.06151	Neutral
100	p.Ala100Gly			5224	1793	3.55408	6.89695					-53.1508	Deleterious			-53.1508	Deleterious
100	p.Ala100Val			9737	705	6.62444	2.71185					-0.000207161	Neutral			-0.000207161	Neutral
[truncated: 1,124 more rows]
