# Supplementary material for: Functional characterization of all CDKN2A missense variants and comparison to in silico models of pathogenicity
Source: eLife. 2025 Apr 16;13:RP95347. doi: 10.7554/eLife.95347 (PMC12002794; doi:10.7554/eLife.95347)
Supplement: Supplementary file 5. [file elife-95347-supp5.xlsx]

## Sheet: Appendix 1-table 5
Supplementary File 5. Day of confluency by experiment and residue.
Residue	Exp_1	Exp_2
1	32
2	31
3	33
4	31
5	29
6	29
7	33
8	29
9	25
10	29
11	25
12	34
13	33
14	32
15	29	30
16	21
17	23
18	29
19	30
20	23	17
21	17
22	29
23	23
24	27	25
25	30
26	33
27	31	30
28	22
29	29
30	27
31	29
32	16	20
33	33
34	34	30
35	25	25
36	28
37	30
38	22
39	24
40	28
41	30
42	20
43	30
44	32
45	31	30
46	27
47	31
48	16
49	23
50	22
51	23
52	30
53	25
54	33
55	21
56	27
57	30	31
58	27
59	21
60	21
61	28
62	33	33
63	20
64	28
65	23
66	23
67	27
68	20
69	31
70	26
71	20
72	29	28
73	27	29
74	21	23
75	27	28
76	27
77	28
78	30
79	29
80	27
81	20
82	23
83	20
84	23
85	30
86	20
87	22
88	29
89	19
90	28
91	28
92	30
93	25
94	21
95	34
96	34	30
97	22
98	30
99	27
100	23
101	23
102	20
103	29
104	28
105	27
106	30	28
107	33	30
108	18
109	28	30
110	38
111	24
112	27
113	38	35
114	17
115	33
116	32
117	30
118	35
119	38
120	29	30
121	28
122	27	27
123	29	27
124	30	30
125	32	30
126	23
127	30
128	29
129	30
130	25
131	31
132	30
133	38
134	32	28
135	38
136	40	35
137	40
138	40
139	32	30
140	35
141	33
142	30
143	32
144	31
145	30
146	35
147	29
148	31
149	30
150	31
151	32
152	29
153	31	28
154	30
155	32
156	30
