# Supplementary material for: Functional characterization of all CDKN2A missense variants and comparison to in silico models of pathogenicity
Source: eLife. 2025 Apr 16;13:RP95347. doi: 10.7554/eLife.95347 (PMC12002794; doi:10.7554/eLife.95347)
Supplement: Supplementary file 6. [file elife-95347-supp6.xlsx]

## Sheet: Appendix 1-table 6
Supplementary File 6. Normalized fold change for all possible CDKN2A missense and synonymous variants.
Residue	Variant	Normalized fold change_1	Log2 normalized fold change_1	Classification_1	Normalized fold change_2	Log2 normalized fold change_2	Classification_2	Mean of normalized fold change	Mean of log normalized fold change	Classification_merged
1	p.Met1Asn	0.922734	-0.116014	Neutral				0.922734	-0.116014	Neutral
1	p.Met1Lys	0.818012	-0.289806	Neutral				0.818012	-0.289806	Neutral
1	p.Met1Thr	0.941413	-0.0871001	Neutral				0.941413	-0.0871001	Neutral
1	p.Met1Arg	0.794242	-0.33235	Neutral				0.794242	-0.33235	Neutral
1	p.Met1Ser	0.921018	-0.118699	Neutral				0.921018	-0.118699	Neutral
1	p.Met1Ile	0.917821	-0.123715	Neutral				0.917821	-0.123715	Neutral
1	p.Met1Met	1	0	Neutral				1	0	Neutral
1	p.Met1His	1.01458	0.0208801	Neutral				1.01458	0.0208801	Neutral
1	p.Met1Gln	0.964929	-0.0515046	Neutral				0.964929	-0.0515046	Neutral
1	p.Met1Pro	0.870572	-0.199964	Neutral				0.870572	-0.199964	Neutral
1	p.Met1Leu	0.961299	-0.0569427	Neutral				0.961299	-0.0569427	Neutral
1	p.Met1Asp	0.860014	-0.217568	Neutral				0.860014	-0.217568	Neutral
1	p.Met1Glu	0.974617	-0.0370931	Neutral				0.974617	-0.0370931	Neutral
1	p.Met1Ala	0.896867	-0.157034	Neutral				0.896867	-0.157034	Neutral
1	p.Met1Gly	0.940186	-0.0889826	Neutral				0.940186	-0.0889826	Neutral
1	p.Met1Val	1.61392	0.690571	Indeterminate				1.61392	0.690571	Indeterminate
1	p.Met1Tyr	0.916673	-0.125521	Neutral				0.916673	-0.125521	Neutral
1	p.Met1Cys	0.900043	-0.151934	Neutral				0.900043	-0.151934	Neutral
1	p.Met1Trp	0.918312	-0.122944	Neutral				0.918312	-0.122944	Neutral
1	p.Met1Phe	0.972293	-0.0405366	Neutral				0.972293	-0.0405366	Neutral
2	p.Glu2Asn	0.203891	-2.29413	Neutral				0.203891	-2.29413	Neutral
2	p.Glu2Lys	0.391355	-1.35345	Neutral				0.391355	-1.35345	Neutral
2	p.Glu2Thr	0.413961	-1.27243	Neutral				0.413961	-1.27243	Neutral
2	p.Glu2Arg	0.214661	-2.21987	Neutral				0.214661	-2.21987	Neutral
2	p.Glu2Ser	0.636177	-0.652499	Neutral				0.636177	-0.652499	Neutral
2	p.Glu2Ile	0.244342	-2.03303	Neutral				0.244342	-2.03303	Neutral
2	p.Glu2Met	0.57032	-0.810157	Neutral				0.57032	-0.810157	Neutral
2	p.Glu2His	0.39612	-1.33599	Neutral				0.39612	-1.33599	Neutral
2	p.Glu2Gln	0.267365	-1.90312	Neutral				0.267365	-1.90312	Neutral
2	p.Glu2Pro	0.308076	-1.69864	Neutral				0.308076	-1.69864	Neutral
2	p.Glu2Leu	0.245886	-2.02394	Neutral				0.245886	-2.02394	Neutral
2	p.Glu2Asp	0.14911	-2.74555	Neutral				0.14911	-2.74555	Neutral
2	p.Glu2Glu	1	0	Neutral				1	0	Neutral
2	p.Glu2Ala	0.61203	-0.708325	Neutral				0.61203	-0.708325	Neutral
2	p.Glu2Gly	0.356702	-1.48721	Neutral				0.356702	-1.48721	Neutral
2	p.Glu2Val	0.232916	-2.10212	Neutral				0.232916	-2.10212	Neutral
2	p.Glu2Tyr	0.310482	-1.68742	Neutral				0.310482	-1.68742	Neutral
2	p.Glu2Cys	0.639515	-0.64495	Neutral				0.639515	-0.64495	Neutral
2	p.Glu2Trp	0.440371	-1.18321	Neutral				0.440371	-1.18321	Neutral
2	p.Glu2Phe	0.384217	-1.38001	Neutral				0.384217	-1.38001	Neutral
3	p.Pro3Asn	1.3778	0.462366	Indeterminate				1.3778	0.462366	Indeterminate
3	p.Pro3Lys	1.4846	0.57007	Indeterminate				1.4846	0.57007	Indeterminate
3	p.Pro3Thr	1.39422	0.47946	Indeterminate				1.39422	0.47946	Indeterminate
3	p.Pro3Arg	2.21816	1.14936	Deleterious				2.21816	1.14936	Deleterious
3	p.Pro3Ser	1.71151	0.775273	Indeterminate				1.71151	0.775273	Indeterminate
3	p.Pro3Ile	1.33018	0.411618	Indeterminate				1.33018	0.411618	Indeterminate
3	p.Pro3Met	1.69075	0.757664	Indeterminate				1.69075	0.757664	Indeterminate
3	p.Pro3His	1.07764	0.10787	Neutral				1.07764	0.10787	Neutral
3	p.Pro3Gln	0.737326	-0.439626	Neutral				0.737326	-0.439626	Neutral
3	p.Pro3Pro	1	0	Neutral				1	0	Neutral
3	p.Pro3Leu	1.52042	0.604471	Indeterminate				1.52042	0.604471	Indeterminate
3	p.Pro3Asp	1.67716	0.746022	Indeterminate				1.67716	0.746022	Indeterminate
3	p.Pro3Glu	1.1489	0.200259	Neutral				1.1489	0.200259	Neutral
3	p.Pro3Ala	1.06246	0.0874128	Neutral				1.06246	0.0874128	Neutral
3	p.Pro3Gly	2.74569	1.45717	Deleterious				2.74569	1.45717	Deleterious
3	p.Pro3Val	1.70894	0.773098	Indeterminate				1.70894	0.773098	Indeterminate
3	p.Pro3Tyr	1.17633	0.234291	Neutral				1.17633	0.234291	Neutral
3	p.Pro3Cys	1.49325	0.578454	Indeterminate				1.49325	0.578454	Indeterminate
3	p.Pro3Trp	1.94376	0.958849	Indeterminate				1.94376	0.958849	Indeterminate
3	p.Pro3Phe	1.68796	0.755277	Indeterminate				1.68796	0.755277	Indeterminate
4	p.Ala4Asn	1.3566	0.439995	Indeterminate				1.3566	0.439995	Indeterminate
4	p.Ala4Lys	0.98421	-0.0229616	Neutral				0.98421	-0.0229616	Neutral
4	p.Ala4Thr	2.7805	1.47535	Deleterious				2.7805	1.47535	Deleterious
4	p.Ala4Arg	1.06969	0.0971974	Neutral				1.06969	0.0971974	Neutral
4	p.Ala4Ser	2.88497	1.52856	Deleterious				2.88497	1.52856	Deleterious
4	p.Ala4Ile	0.757173	-0.401305	Neutral				0.757173	-0.401305	Neutral
4	p.Ala4Met	1.44934	0.5354	Indeterminate				1.44934	0.5354	Indeterminate
4	p.Ala4His	1.16006	0.214198	Neutral				1.16006	0.214198	Neutral
4	p.Ala4Gln	0.772512	-0.372371	Neutral				0.772512	-0.372371	Neutral
4	p.Ala4Pro	0.841829	-0.248401	Neutral				0.841829	-0.248401	Neutral
4	p.Ala4Leu	0.958217	-0.0615762	Neutral				0.958217	-0.0615762	Neutral
4	p.Ala4Asp	1.09558	0.131692	Neutral				1.09558	0.131692	Neutral
4	p.Ala4Glu	0.645372	-0.631798	Neutral				0.645372	-0.631798	Neutral
4	p.Ala4Ala	1	0	Neutral				1	0	Neutral
4	p.Ala4Gly	1.33733	0.419356	Indeterminate				1.33733	0.419356	Indeterminate
4	p.Ala4Val	0.777143	-0.363748	Neutral				0.777143	-0.363748	Neutral
4	p.Ala4Tyr	0.901968	-0.148852	Neutral				0.901968	-0.148852	Neutral
4	p.Ala4Cys	2.08003	1.0566	Indeterminate				2.08003	1.0566	Indeterminate
4	p.Ala4Trp	1.11796	0.160871	Neutral				1.11796	0.160871	Neutral
4	p.Ala4Phe	1.42456	0.510521	Indeterminate				1.42456	0.510521	Indeterminate
5	p.Ala5Asn	0.799714	-0.322445	Neutral				0.799714	-0.322445	Neutral
5	p.Ala5Lys	0.368425	-1.44056	Neutral				0.368425	-1.44056	Neutral
5	p.Ala5Thr	1.03501	0.0496403	Neutral				1.03501	0.0496403	Neutral
5	p.Ala5Arg	0.571393	-0.807444	Neutral				0.571393	-0.807444	Neutral
5	p.Ala5Ser	2.86276	1.51741	Deleterious				2.86276	1.51741	Deleterious
5	p.Ala5Ile	0.311026	-1.68489	Neutral				0.311026	-1.68489	Neutral
5	p.Ala5Met	0.866447	-0.206816	Neutral				0.866447	-0.206816	Neutral
5	p.Ala5His	1.10074	0.138469	Neutral				1.10074	0.138469	Neutral
5	p.Ala5Gln	1.10719	0.146898	Neutral				1.10719	0.146898	Neutral
5	p.Ala5Pro	0.86252	-0.213371	Neutral				0.86252	-0.213371	Neutral
5	p.Ala5Leu	1.87838	0.909487	Indeterminate				1.87838	0.909487	Indeterminate
5	p.Ala5Asp	1.13807	0.186586	Neutral				1.13807	0.186586	Neutral
5	p.Ala5Glu	1.37194	0.456219	Indeterminate				1.37194	0.456219	Indeterminate
5	p.Ala5Ala	1	0	Neutral				1	0	Neutral
5	p.Ala5Gly	0.77016	-0.376771	Neutral				0.77016	-0.376771	Neutral
5	p.Ala5Val	0.89098	-0.166535	Neutral				0.89098	-0.166535	Neutral
5	p.Ala5Tyr	4.82205	2.26965	Deleterious				4.82205	2.26965	Deleterious
5	p.Ala5Cys	1.26164	0.335302	Indeterminate				1.26164	0.335302	Indeterminate
5	p.Ala5Trp	2.4394	1.28653	Deleterious				2.4394	1.28653	Deleterious
5	p.Ala5Phe	0.896799	-0.157143	Neutral				0.896799	-0.157143	Neutral
6	p.Gly6Asn	0.950515	-0.0732186	Neutral				0.950515	-0.0732186	Neutral
6	p.Gly6Lys	1.39642	0.48173	Indeterminate				1.39642	0.48173	Indeterminate
6	p.Gly6Thr	1.46997	0.555788	Indeterminate				1.46997	0.555788	Indeterminate
6	p.Gly6Arg	4.48313	2.1645	Deleterious				4.48313	2.1645	Deleterious
6	p.Gly6Ser	3.4537	1.78814	Deleterious				3.4537	1.78814	Deleterious
6	p.Gly6Ile	3.75511	1.90886	Deleterious				3.75511	1.90886	Deleterious
6	p.Gly6Met	3.50638	1.80998	Deleterious				3.50638	1.80998	Deleterious
6	p.Gly6His	0.719359	-0.475215	Neutral				0.719359	-0.475215	Neutral
6	p.Gly6Gln	0.869472	-0.201789	Neutral				0.869472	-0.201789	Neutral
6	p.Gly6Pro	2.06906	1.04898	Indeterminate				2.06906	1.04898	Indeterminate
6	p.Gly6Leu	1.2443	0.315335	Indeterminate				1.2443	0.315335	Indeterminate
6	p.Gly6Asp	1.04364	0.0616178	Neutral				1.04364	0.0616178	Neutral
6	p.Gly6Glu	1.16174	0.216287	Neutral				1.16174	0.216287	Neutral
6	p.Gly6Ala	1.04914	0.0692103	Neutral				1.04914	0.0692103	Neutral
6	p.Gly6Gly	1	0	Neutral				1	0	Neutral
6	p.Gly6Val	1.00033	0.000482385	Neutral				1.00033	0.000482385	Neutral
6	p.Gly6Tyr	1.00868	0.0124665	Neutral				1.00868	0.0124665	Neutral
6	p.Gly6Cys	1.82847	0.87064	Indeterminate				1.82847	0.87064	Indeterminate
6	p.Gly6Trp	1.43898	0.525047	Indeterminate				1.43898	0.525047	Indeterminate
6	p.Gly6Phe	1.5769	0.657093	Indeterminate				1.5769	0.657093	Indeterminate
7	p.Ser7Asn	0.889651	-0.168688	Neutral				0.889651	-0.168688	Neutral
7	p.Ser7Lys	0.909955	-0.136132	Neutral				0.909955	-0.136132	Neutral
7	p.Ser7Thr	2.03514	1.02513	Indeterminate				2.03514	1.02513	Indeterminate
7	p.Ser7Arg	0.818269	-0.289354	Neutral				0.818269	-0.289354	Neutral
7	p.Ser7Ser	1	0	Neutral				1	0	Neutral
7	p.Ser7Ile	1.22858	0.296991	Indeterminate				1.22858	0.296991	Indeterminate
7	p.Ser7Met	1.18448	0.244252	Indeterminate				1.18448	0.244252	Indeterminate
7	p.Ser7His	1.47451	0.560239	Indeterminate				1.47451	0.560239	Indeterminate
7	p.Ser7Gln	1.10414	0.142924	Neutral				1.10414	0.142924	Neutral
7	p.Ser7Pro	1.26377	0.337732	Indeterminate				1.26377	0.337732	Indeterminate
7	p.Ser7Leu	1.79697	0.845568	Indeterminate				1.79697	0.845568	Indeterminate
7	p.Ser7Asp	0.986827	-0.019131	Neutral				0.986827	-0.019131	Neutral
7	p.Ser7Glu	1.65387	0.725849	Indeterminate				1.65387	0.725849	Indeterminate
7	p.Ser7Ala	1.95218	0.965084	Indeterminate				1.95218	0.965084	Indeterminate
7	p.Ser7Gly	0.932395	-0.100987	Neutral				0.932395	-0.100987	Neutral
7	p.Ser7Val	1.00312	0.00449032	Neutral				1.00312	0.00449032	Neutral
7	p.Ser7Tyr	2.56553	1.35925	Deleterious				2.56553	1.35925	Deleterious
7	p.Ser7Cys	1.25596	0.328792	Indeterminate				1.25596	0.328792	Indeterminate
7	p.Ser7Trp	1.30819	0.387571	Indeterminate				1.30819	0.387571	Indeterminate
7	p.Ser7Phe	1.16519	0.220567	Neutral				1.16519	0.220567	Neutral
8	p.Ser8Asn	0.568996	-0.813511	Neutral				0.568996	-0.813511	Neutral
8	p.Ser8Lys	1.72738	0.788589	Indeterminate				1.72738	0.788589	Indeterminate
8	p.Ser8Thr	0.921623	-0.117752	Neutral				0.921623	-0.117752	Neutral
8	p.Ser8Arg	0.691475	-0.53225	Neutral				0.691475	-0.53225	Neutral
8	p.Ser8Ser	1	0	Neutral				1	0	Neutral
8	p.Ser8Ile	0.717197	-0.479558	Neutral				0.717197	-0.479558	Neutral
8	p.Ser8Met	0.555647	-0.847759	Neutral				0.555647	-0.847759	Neutral
8	p.Ser8His	0.603363	-0.728903	Neutral				0.603363	-0.728903	Neutral
8	p.Ser8Gln	0.666316	-0.585722	Neutral				0.666316	-0.585722	Neutral
8	p.Ser8Pro	0.832833	-0.2639	Neutral				0.832833	-0.2639	Neutral
8	p.Ser8Leu	0.836026	-0.258381	Neutral				0.836026	-0.258381	Neutral
8	p.Ser8Asp	0.72938	-0.455258	Neutral				0.72938	-0.455258	Neutral
8	p.Ser8Glu	0.449229	-1.15448	Neutral				0.449229	-1.15448	Neutral
8	p.Ser8Ala	0.679623	-0.557194	Neutral				0.679623	-0.557194	Neutral
8	p.Ser8Gly	0.820812	-0.284877	Neutral				0.820812	-0.284877	Neutral
8	p.Ser8Val	0.711381	-0.491306	Neutral				0.711381	-0.491306	Neutral
8	p.Ser8Tyr	0.608465	-0.716753	Neutral				0.608465	-0.716753	Neutral
8	p.Ser8Cys	0.521973	-0.937953	Neutral				0.521973	-0.937953	Neutral
8	p.Ser8Trp	0.579278	-0.787673	Neutral				0.579278	-0.787673	Neutral
8	p.Ser8Phe	0.753799	-0.407748	Neutral				0.753799	-0.407748	Neutral
9	p.Met9Asn	1.10365	0.142285	Neutral				1.10365	0.142285	Neutral
9	p.Met9Lys	1.20838	0.273069	Indeterminate				1.20838	0.273069	Indeterminate
9	p.Met9Thr	1.19446	0.256353	Indeterminate				1.19446	0.256353	Indeterminate
9	p.Met9Arg	1.13559	0.183439	Neutral				1.13559	0.183439	Neutral
9	p.Met9Ser	1.16134	0.215794	Neutral				1.16134	0.215794	Neutral
9	p.Met9Ile	1.18283	0.242248	Indeterminate				1.18283	0.242248	Indeterminate
9	p.Met9Met	1	0	Neutral				1	0	Neutral
9	p.Met9His	1.04989	0.0702399	Neutral				1.04989	0.0702399	Neutral
9	p.Met9Gln	1.03583	0.0507938	Neutral				1.03583	0.0507938	Neutral
9	p.Met9Pro	1.17833	0.236741	Neutral				1.17833	0.236741	Neutral
9	p.Met9Leu	0.924972	-0.112518	Neutral				0.924972	-0.112518	Neutral
9	p.Met9Asp	1.15881	0.212643	Neutral				1.15881	0.212643	Neutral
9	p.Met9Glu	1.02028	0.0289689	Neutral				1.02028	0.0289689	Neutral
9	p.Met9Ala	1.07368	0.102565	Neutral				1.07368	0.102565	Neutral
9	p.Met9Gly	1.104	0.142743	Neutral				1.104	0.142743	Neutral
9	p.Met9Val	1.25022	0.322177	Indeterminate				1.25022	0.322177	Indeterminate
9	p.Met9Tyr	1.0009	0.00129755	Neutral				1.0009	0.00129755	Neutral
9	p.Met9Cys	1.07791	0.108232	Neutral				1.07791	0.108232	Neutral
9	p.Met9Trp	1.12562	0.170718	Neutral				1.12562	0.170718	Neutral
9	p.Met9Phe	1.14374	0.193756	Neutral				1.14374	0.193756	Neutral
10	p.Glu10Asn	1.07792	0.10825	Neutral				1.07792	0.10825	Neutral
10	p.Glu10Lys	2.30864	1.20704	Deleterious				2.30864	1.20704	Deleterious
10	p.Glu10Thr	1.1791	0.237691	Neutral				1.1791	0.237691	Neutral
10	p.Glu10Arg	0.941228	-0.0873838	Neutral				0.941228	-0.0873838	Neutral
10	p.Glu10Ser	1.65201	0.724219	Indeterminate				1.65201	0.724219	Indeterminate
10	p.Glu10Ile	1.53543	0.61864	Indeterminate				1.53543	0.61864	Indeterminate
10	p.Glu10Met	1.67338	0.742763	Indeterminate				1.67338	0.742763	Indeterminate
10	p.Glu10His	2.29456	1.19822	Deleterious				2.29456	1.19822	Deleterious
10	p.Glu10Gln	0.93026	-0.104295	Neutral				0.93026	-0.104295	Neutral
10	p.Glu10Pro	1.02601	0.0370437	Neutral				1.02601	0.0370437	Neutral
10	p.Glu10Leu	1.14512	0.195496	Neutral				1.14512	0.195496	Neutral
10	p.Glu10Asp	1.1276	0.173252	Neutral				1.1276	0.173252	Neutral
10	p.Glu10Glu	1	0	Neutral				1	0	Neutral
10	p.Glu10Ala	1.76776	0.821924	Indeterminate				1.76776	0.821924	Indeterminate
10	p.Glu10Gly	1.04184	0.0591397	Neutral				1.04184	0.0591397	Neutral
10	p.Glu10Val	1.04072	0.0575753	Neutral				1.04072	0.0575753	Neutral
10	p.Glu10Tyr	1.33292	0.41459	Indeterminate				1.33292	0.41459	Indeterminate
10	p.Glu10Cys	1.15204	0.204192	Neutral				1.15204	0.204192	Neutral
10	p.Glu10Trp	1.01452	0.0208034	Neutral				1.01452	0.0208034	Neutral
10	p.Glu10Phe	1.10617	0.145567	Neutral				1.10617	0.145567	Neutral
11	p.Pro11Asn	1.12689	0.172342	Neutral				1.12689	0.172342	Neutral
11	p.Pro11Lys	1.2848	0.361547	Indeterminate				1.2848	0.361547	Indeterminate
11	p.Pro11Thr	1.44246	0.528534	Indeterminate				1.44246	0.528534	Indeterminate
11	p.Pro11Arg	1.08216	0.113914	Neutral				1.08216	0.113914	Neutral
11	p.Pro11Ser	1.20904	0.273858	Indeterminate				1.20904	0.273858	Indeterminate
11	p.Pro11Ile	1.13161	0.178375	Neutral				1.13161	0.178375	Neutral
11	p.Pro11Met	1.06743	0.0941471	Neutral				1.06743	0.0941471	Neutral
11	p.Pro11His	1.12331	0.167761	Neutral				1.12331	0.167761	Neutral
11	p.Pro11Gln	0.960497	-0.0581465	Neutral				0.960497	-0.0581465	Neutral
11	p.Pro11Pro	1	0	Neutral				1	0	Neutral
11	p.Pro11Leu	1.11794	0.160844	Neutral				1.11794	0.160844	Neutral
11	p.Pro11Asp	1.0672	0.0938278	Neutral				1.0672	0.0938278	Neutral
11	p.Pro11Glu	1.00579	0.00832825	Neutral				1.00579	0.00832825	Neutral
11	p.Pro11Ala	1.09894	0.136114	Neutral				1.09894	0.136114	Neutral
11	p.Pro11Gly	1.19696	0.259381	Indeterminate				1.19696	0.259381	Indeterminate
11	p.Pro11Val	1.0893	0.123395	Neutral				1.0893	0.123395	Neutral
11	p.Pro11Tyr	1.21752	0.283943	Indeterminate				1.21752	0.283943	Indeterminate
11	p.Pro11Cys	1.01364	0.0195447	Neutral				1.01364	0.0195447	Neutral
11	p.Pro11Trp	1.30853	0.387945	Indeterminate				1.30853	0.387945	Indeterminate
11	p.Pro11Phe	1.22263	0.289988	Indeterminate				1.22263	0.289988	Indeterminate
12	p.Ser12Asn	0.919619	-0.120892	Neutral				0.919619	-0.120892	Neutral
12	p.Ser12Lys	0.713683	-0.486646	Neutral				0.713683	-0.486646	Neutral
12	p.Ser12Thr	0.764464	-0.38748	Neutral				0.764464	-0.38748	Neutral
12	p.Ser12Arg	0.843282	-0.245913	Neutral				0.843282	-0.245913	Neutral
12	p.Ser12Ser	1	0	Neutral				1	0	Neutral
12	p.Ser12Ile	0.807641	-0.308215	Neutral				0.807641	-0.308215	Neutral
12	p.Ser12Met	0.71374	-0.48653	Neutral				0.71374	-0.48653	Neutral
12	p.Ser12His	1.11654	0.159036	Neutral				1.11654	0.159036	Neutral
12	p.Ser12Gln	1.15228	0.204489	Neutral				1.15228	0.204489	Neutral
12	p.Ser12Pro	0.779614	-0.359168	Neutral				0.779614	-0.359168	Neutral
12	p.Ser12Leu	2.34546	1.22987	Deleterious				2.34546	1.22987	Deleterious
12	p.Ser12Asp	0.662296	-0.594452	Neutral				0.662296	-0.594452	Neutral
12	p.Ser12Glu	0.882885	-0.179702	Neutral				0.882885	-0.179702	Neutral
12	p.Ser12Ala	0.852986	-0.229407	Neutral				0.852986	-0.229407	Neutral
12	p.Ser12Gly	0.819485	-0.287211	Neutral				0.819485	-0.287211	Neutral
12	p.Ser12Val	1.13054	0.177009	Neutral				1.13054	0.177009	Neutral
12	p.Ser12Tyr	0.753915	-0.407527	Neutral				0.753915	-0.407527	Neutral
12	p.Ser12Cys	1.12956	0.175757	Neutral				1.12956	0.175757	Neutral
12	p.Ser12Trp	1.12933	0.175463	Neutral				1.12933	0.175463	Neutral
12	p.Ser12Phe	1.10579	0.145075	Neutral				1.10579	0.145075	Neutral
13	p.Ala13Asn	0.608524	-0.716615	Neutral				0.608524	-0.716615	Neutral
13	p.Ala13Lys	0.712309	-0.489425	Neutral				0.712309	-0.489425	Neutral
13	p.Ala13Thr	0.700109	-0.514349	Neutral				0.700109	-0.514349	Neutral
13	p.Ala13Arg	0.606639	-0.721091	Neutral				0.606639	-0.721091	Neutral
13	p.Ala13Ser	0.631913	-0.662201	Neutral				0.631913	-0.662201	Neutral
13	p.Ala13Ile	0.653512	-0.613715	Neutral				0.653512	-0.613715	Neutral
13	p.Ala13Met	1.06822	0.0952082	Neutral				1.06822	0.0952082	Neutral
13	p.Ala13His	0.754165	-0.407047	Neutral				0.754165	-0.407047	Neutral
13	p.Ala13Gln	0.663174	-0.59254	Neutral				0.663174	-0.59254	Neutral
13	p.Ala13Pro	0.534532	-0.903651	Neutral				0.534532	-0.903651	Neutral
13	p.Ala13Leu	0.740771	-0.4329	Neutral				0.740771	-0.4329	Neutral
13	p.Ala13Asp	0.681795	-0.55259	Neutral				0.681795	-0.55259	Neutral
13	p.Ala13Glu	0.642809	-0.637537	Neutral				0.642809	-0.637537	Neutral
13	p.Ala13Ala	1	0	Neutral				1	0	Neutral
13	p.Ala13Gly	0.571695	-0.806683	Neutral				0.571695	-0.806683	Neutral
13	p.Ala13Val	0.699972	-0.51463	Neutral				0.699972	-0.51463	Neutral
13	p.Ala13Tyr	1.03136	0.0445429	Neutral				1.03136	0.0445429	Neutral
13	p.Ala13Cys	0.817643	-0.290457	Neutral				0.817643	-0.290457	Neutral
13	p.Ala13Trp	0.76659	-0.383473	Neutral				0.76659	-0.383473	Neutral
13	p.Ala13Phe	0.938067	-0.0922374	Neutral				0.938067	-0.0922374	Neutral
14	p.Asp14Asn	1.13906	0.187846	Neutral				1.13906	0.187846	Neutral
14	p.Asp14Lys	1.09973	0.137151	Neutral				1.09973	0.137151	Neutral
14	p.Asp14Thr	0.945684	-0.0805699	Neutral				0.945684	-0.0805699	Neutral
14	p.Asp14Arg	1.63071	0.705497	Indeterminate				1.63071	0.705497	Indeterminate
14	p.Asp14Ser	0.915643	-0.127142	Neutral				0.915643	-0.127142	Neutral
14	p.Asp14Ile	2.29948	1.20131	Deleterious				2.29948	1.20131	Deleterious
14	p.Asp14Met	1.76506	0.81972	Indeterminate				1.76506	0.81972	Indeterminate
14	p.Asp14His	0.952308	-0.0704992	Neutral				0.952308	-0.0704992	Neutral
14	p.Asp14Gln	1.12349	0.167982	Neutral				1.12349	0.167982	Neutral
14	p.Asp14Pro	2.56299	1.35783	Deleterious				2.56299	1.35783	Deleterious
14	p.Asp14Leu	1.79596	0.844752	Indeterminate				1.79596	0.844752	Indeterminate
14	p.Asp14Asp	1	0	Neutral				1	0	Neutral
14	p.Asp14Glu	1.08927	0.123355	Neutral				1.08927	0.123355	Neutral
14	p.Asp14Ala	1.37489	0.459317	Indeterminate				1.37489	0.459317	Indeterminate
14	p.Asp14Gly	1.04373	0.0617437	Neutral				1.04373	0.0617437	Neutral
14	p.Asp14Val	2.47241	1.30592	Deleterious				2.47241	1.30592	Deleterious
14	p.Asp14Tyr	1.92884	0.947735	Indeterminate				1.92884	0.947735	Indeterminate
14	p.Asp14Cys	1.04574	0.0645222	Neutral				1.04574	0.0645222	Neutral
14	p.Asp14Trp	1.86828	0.901712	Indeterminate				1.86828	0.901712	Indeterminate
14	p.Asp14Phe	1.93395	0.951551	Indeterminate				1.93395	0.951551	Indeterminate
15	p.Trp15Asn	1.50595	0.59067	Indeterminate	0.726066	-0.461827	Neutral	1.11601	0.158345	Neutral
15	p.Trp15Lys	1.37115	0.455384	Indeterminate	0.718047	-0.47785	Neutral	1.0446	0.0629467	Neutral
15	p.Trp15Thr	1.65296	0.725048	Indeterminate	1.0253	0.0360462	Neutral	1.33913	0.421294	Indeterminate
15	p.Trp15Arg	1.19182	0.253169	Indeterminate	0.648631	-0.62453	Neutral	0.920227	-0.119939	Neutral
15	p.Trp15Ser	1.37323	0.457573	Indeterminate	0.689579	-0.536213	Neutral	1.0314	0.0446099	Neutral
15	p.Trp15Ile	1.03197	0.0453958	Neutral	0.985536	-0.0210189	Neutral	1.00875	0.0125706	Neutral
15	p.Trp15Met	1.12656	0.171922	Neutral	0.934542	-0.0976691	Neutral	1.03055	0.0434147	Neutral
15	p.Trp15His	1.48197	0.567519	Indeterminate	1.61464	0.691211	Indeterminate	1.54831	0.630691	Indeterminate
15	p.Trp15Gln	1.45864	0.544622	Indeterminate	1.13022	0.176603	Neutral	1.29443	0.372316	Indeterminate
15	p.Trp15Pro	1.82767	0.870005	Indeterminate	1.46491	0.550812	Indeterminate	1.64629	0.719218	Indeterminate
15	p.Trp15Leu	1.30188	0.380593	Indeterminate	1.14419	0.194328	Neutral	1.22303	0.290464	Indeterminate
15	p.Trp15Asp	1.2775	0.353328	Indeterminate	1.06012	0.0842273	Neutral	1.16881	0.225043	Neutral
15	p.Trp15Glu	1.09121	0.125925	Neutral	1.10736	0.14713	Neutral	1.09929	0.136567	Neutral
15	p.Trp15Ala	1.35827	0.441767	Indeterminate	0.772834	-0.371769	Neutral	1.06555	0.0915989	Neutral
15	p.Trp15Gly	1.17838	0.23681	Neutral	1.45644	0.542448	Indeterminate	1.31741	0.397708	Indeterminate
15	p.Trp15Val	1.05745	0.0805859	Neutral	0.624719	-0.67872	Neutral	0.841083	-0.249679	Neutral
15	p.Trp15Tyr	1.67356	0.742918	Indeterminate	0.910957	-0.134545	Neutral	1.29226	0.369893	Indeterminate
15	p.Trp15Cys	1.50824	0.592869	Indeterminate	0.824192	-0.278947	Neutral	1.16622	0.221837	Neutral
15	p.Trp15Trp	1	0	Neutral	1	0	Neutral	1	0	Neutral
15	p.Trp15Phe	1.29026	0.367666	Indeterminate	0.774122	-0.369368	Neutral	1.03219	0.0457124	Neutral
16	p.Leu16Asn	17.0481	4.09154	Deleterious				17.0481	4.09154	Deleterious
16	p.Leu16Lys	24.1479	4.59382	Deleterious				24.1479	4.59382	Deleterious
16	p.Leu16Thr	2.30771	1.20646	Deleterious				2.30771	1.20646	Deleterious
16	p.Leu16Arg	28.6513	4.84053	Deleterious				28.6513	4.84053	Deleterious
16	p.Leu16Ser	12.8482	3.6835	Deleterious				12.8482	3.6835	Deleterious
16	p.Leu16Ile	1.33787	0.41994	Indeterminate				1.33787	0.41994	Indeterminate
16	p.Leu16Met	1.18471	0.244535	Indeterminate				1.18471	0.244535	Indeterminate
16	p.Leu16His	16.8154	4.07172	Deleterious				16.8154	4.07172	Deleterious
16	p.Leu16Gln	16.7147	4.06305	Deleterious				16.7147	4.06305	Deleterious
16	p.Leu16Pro	15.8174	3.98344	Deleterious				15.8174	3.98344	Deleterious
16	p.Leu16Leu	1	0	Neutral				1	0	Neutral
16	p.Leu16Asp	24.0024	4.5851	Deleterious				24.0024	4.5851	Deleterious
16	p.Leu16Glu	21.7068	4.44007	Deleterious				21.7068	4.44007	Deleterious
16	p.Leu16Ala	4.9193	2.29845	Deleterious				4.9193	2.29845	Deleterious
16	p.Leu16Gly	19.9548	4.31866	Deleterious				19.9548	4.31866	Deleterious
16	p.Leu16Val	2.03873	1.02767	Indeterminate				2.03873	1.02767	Indeterminate
16	p.Leu16Tyr	21.662	4.43709	Deleterious				21.662	4.43709	Deleterious
16	p.Leu16Cys	2.03774	1.02697	Indeterminate				2.03774	1.02697	Indeterminate
16	p.Leu16Trp	21.5779	4.43148	Deleterious				21.5779	4.43148	Deleterious
16	p.Leu16Phe	1.47572	0.561417	Indeterminate				1.47572	0.561417	Indeterminate
17	p.Ala17Asn	1.59845	0.676676	Indeterminate				1.59845	0.676676	Indeterminate
17	p.Ala17Lys	36.6215	5.19462	Deleterious				36.6215	5.19462	Deleterious
17	p.Ala17Thr	1.13174	0.178538	Neutral				1.13174	0.178538	Neutral
17	p.Ala17Arg	39.1079	5.28939	Deleterious				39.1079	5.28939	Deleterious
17	p.Ala17Ser	1.14459	0.194836	Neutral				1.14459	0.194836	Neutral
17	p.Ala17Ile	1.69998	0.76552	Indeterminate				1.69998	0.76552	Indeterminate
17	p.Ala17Met	3.31851	1.73053	Deleterious				3.31851	1.73053	Deleterious
17	p.Ala17His	1.14471	0.194979	Neutral				1.14471	0.194979	Neutral
17	p.Ala17Gln	3.54194	1.82454	Deleterious				3.54194	1.82454	Deleterious
17	p.Ala17Pro	1.09707	0.13365	Neutral				1.09707	0.13365	Neutral
17	p.Ala17Leu	6.22848	2.63888	Deleterious				6.22848	2.63888	Deleterious
17	p.Ala17Asp	2.99217	1.58119	Deleterious				2.99217	1.58119	Deleterious
17	p.Ala17Glu	15.2103	3.92697	Deleterious				15.2103	3.92697	Deleterious
17	p.Ala17Ala	1	0	Neutral				1	0	Neutral
17	p.Ala17Gly	1.00633	0.00910737	Neutral				1.00633	0.00910737	Neutral
17	p.Ala17Val	1.04456	0.0628939	Neutral				1.04456	0.0628939	Neutral
17	p.Ala17Tyr	4.73176	2.24238	Deleterious				4.73176	2.24238	Deleterious
17	p.Ala17Cys	0.757898	-0.399925	Neutral				0.757898	-0.399925	Neutral
17	p.Ala17Trp	5.40752	2.43497	Deleterious				5.40752	2.43497	Deleterious
17	p.Ala17Phe	3.04437	1.60614	Deleterious				3.04437	1.60614	Deleterious
18	p.Thr18Asn	2.53813	1.34376	Deleterious				2.53813	1.34376	Deleterious
18	p.Thr18Lys	1.83342	0.874539	Indeterminate				1.83342	0.874539	Indeterminate
18	p.Thr18Thr	1	0	Neutral				1	0	Neutral
18	p.Thr18Arg	1.80601	0.852807	Indeterminate				1.80601	0.852807	Indeterminate
18	p.Thr18Ser	1.44892	0.534975	Indeterminate				1.44892	0.534975	Indeterminate
18	p.Thr18Ile	2.08383	1.05924	Indeterminate				2.08383	1.05924	Indeterminate
18	p.Thr18Met	2.38455	1.25372	Deleterious				2.38455	1.25372	Deleterious
18	p.Thr18His	1.35737	0.440814	Indeterminate				1.35737	0.440814	Indeterminate
18	p.Thr18Gln	1.66043	0.731557	Indeterminate				1.66043	0.731557	Indeterminate
18	p.Thr18Pro	11.3398	3.50332	Deleterious				11.3398	3.50332	Deleterious
18	p.Thr18Leu	2.42351	1.2771	Deleterious				2.42351	1.2771	Deleterious
18	p.Thr18Asp	1.65991	0.731102	Indeterminate				1.65991	0.731102	Indeterminate
18	p.Thr18Glu	1.46214	0.548085	Indeterminate				1.46214	0.548085	Indeterminate
18	p.Thr18Ala	2.4577	1.29731	Deleterious				2.4577	1.29731	Deleterious
18	p.Thr18Gly	1.45535	0.54137	Indeterminate				1.45535	0.54137	Indeterminate
18	p.Thr18Val	1.5035	0.588324	Indeterminate				1.5035	0.588324	Indeterminate
18	p.Thr18Tyr	2.53667	1.34294	Deleterious				2.53667	1.34294	Deleterious
18	p.Thr18Cys	1.0939	0.129476	Neutral				1.0939	0.129476	Neutral
18	p.Thr18Trp	1.89169	0.919676	Indeterminate				1.89169	0.919676	Indeterminate
18	p.Thr18Phe	1.43692	0.522983	Indeterminate				1.43692	0.522983	Indeterminate
19	p.Ala19Asn	0.436266	-1.19672	Neutral				0.436266	-1.19672	Neutral
19	p.Ala19Lys	1.07174	0.0999568	Neutral				1.07174	0.0999568	Neutral
19	p.Ala19Thr	0.673758	-0.569697	Neutral				0.673758	-0.569697	Neutral
19	p.Ala19Arg	0.969384	-0.0448602	Neutral				0.969384	-0.0448602	Neutral
19	p.Ala19Ser	0.423766	-1.23866	Neutral				0.423766	-1.23866	Neutral
19	p.Ala19Ile	0.580124	-0.785567	Neutral				0.580124	-0.785567	Neutral
19	p.Ala19Met	0.40846	-1.29173	Neutral				0.40846	-1.29173	Neutral
19	p.Ala19His	0.727092	-0.45979	Neutral				0.727092	-0.45979	Neutral
19	p.Ala19Gln	0.418522	-1.25663	Neutral				0.418522	-1.25663	Neutral
19	p.Ala19Pro	7.17133	2.84224	Deleterious				7.17133	2.84224	Deleterious
19	p.Ala19Leu	0.379383	-1.39827	Neutral				0.379383	-1.39827	Neutral
19	p.Ala19Asp	1.11288	0.154304	Neutral				1.11288	0.154304	Neutral
19	p.Ala19Glu	0.502917	-0.991608	Neutral				0.502917	-0.991608	Neutral
19	p.Ala19Ala	1	0	Neutral				1	0	Neutral
19	p.Ala19Gly	0.459158	-1.12294	Neutral				0.459158	-1.12294	Neutral
19	p.Ala19Val	0.544288	-0.877558	Neutral				0.544288	-0.877558	Neutral
19	p.Ala19Tyr	0.572234	-0.805322	Neutral				0.572234	-0.805322	Neutral
19	p.Ala19Cys	1.13891	0.187659	Neutral				1.13891	0.187659	Neutral
19	p.Ala19Trp	0.397819	-1.32982	Neutral				0.397819	-1.32982	Neutral
19	p.Ala19Phe	0.257604	-1.95677	Neutral				0.257604	-1.95677	Neutral
20	p.Ala20Asn	17.1376	4.0991	Deleterious	21.9582	4.45669	Deleterious	19.5479	4.28894	Deleterious
20	p.Ala20Lys	21.0148	4.39333	Deleterious	26.9252	4.75089	Deleterious	23.97	4.58316	Deleterious
20	p.Ala20Thr	1.70467	0.769493	Indeterminate	1.4965	0.581597	Indeterminate	1.60059	0.678602	Indeterminate
20	p.Ala20Arg	19.7887	4.3066	Deleterious	27.7349	4.79363	Deleterious	23.7618	4.57057	Deleterious
20	p.Ala20Ser	0.950156	-0.0737638	Neutral	1.80132	0.849053	Indeterminate	1.37574	0.460205	Indeterminate
20	p.Ala20Ile	9.7107	3.27958	Deleterious	10.1259	3.33998	Deleterious	9.9183	3.31009	Deleterious
20	p.Ala20Met	7.12823	2.83354	Deleterious	8.50148	3.08771	Deleterious	7.81486	2.96622	Deleterious
20	p.Ala20His	19.4312	4.28031	Deleterious	27.1132	4.76093	Deleterious	23.2722	4.54054	Deleterious
20	p.Ala20Gln	21.2393	4.40866	Deleterious	26.347	4.71957	Deleterious	23.7932	4.57248	Deleterious
20	p.Ala20Pro	21.6002	4.43297	Deleterious	25.7087	4.68418	Deleterious	23.6544	4.56404	Deleterious
20	p.Ala20Leu	7.1632	2.8406	Deleterious	8.20708	3.03687	Deleterious	7.68514	2.94207	Deleterious
20	p.Ala20Asp	18.9705	4.24568	Deleterious	25.2539	4.65843	Deleterious	22.1122	4.46677	Deleterious
20	p.Ala20Glu	20.2605	4.3406	Deleterious	28.107	4.81286	Deleterious	24.1838	4.59597	Deleterious
20	p.Ala20Ala	1	0	Neutral	1	0	Neutral	1	0	Neutral
20	p.Ala20Gly	5.42484	2.43958	Deleterious	1.9235	0.943733	Indeterminate	3.67417	1.87742	Deleterious
20	p.Ala20Val	1.14632	0.197011	Neutral	1.53593	0.619111	Indeterminate	1.34112	0.423443	Indeterminate
20	p.Ala20Tyr	21.7956	4.44596	Deleterious	26.7396	4.74091	Deleterious	24.2676	4.60096	Deleterious
20	p.Ala20Cys	1.18273	0.242121	Indeterminate	1.33972	0.421933	Indeterminate	1.26123	0.334826	Indeterminate
20	p.Ala20Trp	21.4985	4.42616	Deleterious	27.6329	4.78831	Deleterious	24.5657	4.61857	Deleterious
20	p.Ala20Phe	19.9218	4.31628	Deleterious	26.7166	4.73966	Deleterious	23.3192	4.54345	Deleterious
21	p.Ala21Asn	4.93223	2.30224	Deleterious				4.93223	2.30224	Deleterious
21	p.Ala21Lys	30.3725	4.92469	Deleterious				30.3725	4.92469	Deleterious
21	p.Ala21Thr	1.48163	0.567185	Indeterminate				1.48163	0.567185	Indeterminate
21	p.Ala21Arg	12.0546	3.59151	Deleterious				12.0546	3.59151	Deleterious
21	p.Ala21Ser	1.05197	0.0730884	Neutral				1.05197	0.0730884	Neutral
21	p.Ala21Ile	2.44668	1.29082	Deleterious				2.44668	1.29082	Deleterious
21	p.Ala21Met	3.32863	1.73493	Deleterious				3.32863	1.73493	Deleterious
21	p.Ala21His	9.33864	3.22321	Deleterious				9.33864	3.22321	Deleterious
21	p.Ala21Gln	6.36143	2.66935	Deleterious				6.36143	2.66935	Deleterious
21	p.Ala21Pro	37.9921	5.24763	Deleterious				37.9921	5.24763	Deleterious
21	p.Ala21Leu	1.64506	0.71814	Indeterminate				1.64506	0.71814	Indeterminate
21	p.Ala21Asp	23.3902	4.54783	Deleterious				23.3902	4.54783	Deleterious
21	p.Ala21Glu	9.77228	3.2887	Deleterious				9.77228	3.2887	Deleterious
21	p.Ala21Ala	1	0	Neutral				1	0	Neutral
21	p.Ala21Gly	0.973592	-0.0386111	Neutral				0.973592	-0.0386111	Neutral
21	p.Ala21Val	1.17472	0.232322	Neutral				1.17472	0.232322	Neutral
21	p.Ala21Tyr	7.24809	2.8576	Deleterious				7.24809	2.8576	Deleterious
21	p.Ala21Cys	1.05231	0.0735651	Neutral				1.05231	0.0735651	Neutral
21	p.Ala21Trp	7.68104	2.9413	Deleterious				7.68104	2.9413	Deleterious
21	p.Ala21Phe	6.02405	2.59073	Deleterious				6.02405	2.59073	Deleterious
22	p.Arg22Asn	0.376641	-1.40874	Neutral				0.376641	-1.40874	Neutral
22	p.Arg22Lys	0.990622	-0.0135939	Neutral				0.990622	-0.0135939	Neutral
22	p.Arg22Thr	2.12972	1.09067	Deleterious				2.12972	1.09067	Deleterious
22	p.Arg22Arg	1	0	Neutral				1	0	Neutral
22	p.Arg22Ser	1.49772	0.582767	Indeterminate				1.49772	0.582767	Indeterminate
22	p.Arg22Ile	0.863391	-0.211914	Neutral				0.863391	-0.211914	Neutral
22	p.Arg22Met	1.40014	0.485573	Indeterminate				1.40014	0.485573	Indeterminate
22	p.Arg22His	0.214735	-2.21937	Neutral				0.214735	-2.21937	Neutral
22	p.Arg22Gln	0.388255	-1.36492	Neutral				0.388255	-1.36492	Neutral
22	p.Arg22Pro	6.71909	2.74827	Deleterious				6.71909	2.74827	Deleterious
22	p.Arg22Leu	0.538161	-0.893891	Neutral				0.538161	-0.893891	Neutral
22	p.Arg22Asp	0.90008	-0.151874	Neutral				0.90008	-0.151874	Neutral
22	p.Arg22Glu	0.307827	-1.69981	Neutral				0.307827	-1.69981	Neutral
22	p.Arg22Ala	0.402368	-1.31341	Neutral				0.402368	-1.31341	Neutral
22	p.Arg22Gly	3.31679	1.72979	Deleterious				3.31679	1.72979	Deleterious
22	p.Arg22Val	0.511229	-0.967959	Neutral				0.511229	-0.967959	Neutral
22	p.Arg22Tyr	0.972048	-0.0409008	Neutral				0.972048	-0.0409008	Neutral
22	p.Arg22Cys	0.220368	-2.18202	Neutral				0.220368	-2.18202	Neutral
22	p.Arg22Trp	1.57634	0.656579	Indeterminate				1.57634	0.656579	Indeterminate
22	p.Arg22Phe	1.80421	0.851367	Indeterminate				1.80421	0.851367	Indeterminate
23	p.Gly23Asn	2.46281	1.3003	Deleterious				2.46281	1.3003	Deleterious
23	p.Gly23Lys	20.0555	4.32592	Deleterious				20.0555	4.32592	Deleterious
23	p.Gly23Thr	20.2985	4.3433	Deleterious				20.2985	4.3433	Deleterious
23	p.Gly23Arg	18.6687	4.22255	Deleterious				18.6687	4.22255	Deleterious
23	p.Gly23Ser	3.96229	1.98633	Deleterious				3.96229	1.98633	Deleterious
23	p.Gly23Ile	23.1956	4.53578	Deleterious				23.1956	4.53578	Deleterious
23	p.Gly23Met	19.9026	4.31489	Deleterious				19.9026	4.31489	Deleterious
23	p.Gly23His	18.8935	4.23982	Deleterious				18.8935	4.23982	Deleterious
23	p.Gly23Gln	18.2761	4.19189	Deleterious				18.2761	4.19189	Deleterious
23	p.Gly23Pro	19.4008	4.27805	Deleterious				19.4008	4.27805	Deleterious
23	p.Gly23Leu	22.5549	4.49537	Deleterious				22.5549	4.49537	Deleterious
23	p.Gly23Asp	14.2876	3.83669	Deleterious				14.2876	3.83669	Deleterious
23	p.Gly23Glu	21.2081	4.40655	Deleterious				21.2081	4.40655	Deleterious
23	p.Gly23Ala	1.27436	0.349773	Indeterminate				1.27436	0.349773	Indeterminate
23	p.Gly23Gly	1	0	Neutral				1	0	Neutral
23	p.Gly23Val	19.6379	4.29557	Deleterious				19.6379	4.29557	Deleterious
23	p.Gly23Tyr	20.0222	4.32353	Deleterious				20.0222	4.32353	Deleterious
23	p.Gly23Cys	13.0169	3.70231	Deleterious				13.0169	3.70231	Deleterious
23	p.Gly23Trp	23.1539	4.53318	Deleterious				23.1539	4.53318	Deleterious
23	p.Gly23Phe	20.8124	4.37937	Deleterious				20.8124	4.37937	Deleterious
24	p.Arg24Asn	0.736614	-0.441019	Neutral	1.01582	0.0226394	Neutral	0.876215	-0.190643	Neutral
24	p.Arg24Lys	0.596503	-0.7454	Neutral	1.17946	0.238125	Neutral	0.887981	-0.171399	Neutral
24	p.Arg24Thr	0.720539	-0.472852	Neutral	1.28201	0.358409	Indeterminate	1.00128	0.00183831	Neutral
24	p.Arg24Arg	1	0	Neutral	1	0	Neutral	1	0	Neutral
24	p.Arg24Ser	0.579626	-0.786806	Neutral	0.980186	-0.028873	Neutral	0.779906	-0.358628	Neutral
24	p.Arg24Ile	0.758522	-0.398738	Neutral	0.89804	-0.155149	Neutral	0.828281	-0.271808	Neutral
24	p.Arg24Met	0.904323	-0.14509	Neutral	1.08357	0.115798	Neutral	0.993949	-0.00875689	Neutral
24	p.Arg24His	0.526652	-0.925078	Neutral	0.829832	-0.269108	Neutral	0.678242	-0.560127	Neutral
24	p.Arg24Gln	1.53466	0.617917	Indeterminate	1.59842	0.676647	Indeterminate	1.56654	0.647581	Indeterminate
24	p.Arg24Pro	9.29287	3.21612	Deleterious	7.16926	2.84183	Deleterious	8.23107	3.04108	Deleterious
24	p.Arg24Leu	0.815333	-0.294538	Neutral	1.05526	0.0776038	Neutral	0.935299	-0.096501	Neutral
24	p.Arg24Asp	0.742918	-0.428724	Neutral	0.845967	-0.241327	Neutral	0.794443	-0.331985	Neutral
24	p.Arg24Glu	0.66616	-0.586059	Neutral	1.1368	0.184983	Neutral	0.901482	-0.14963	Neutral
24	p.Arg24Ala	0.532632	-0.90879	Neutral	0.846072	-0.241147	Neutral	0.689352	-0.536687	Neutral
24	p.Arg24Gly	0.690008	-0.535316	Neutral	1.23267	0.30179	Indeterminate	0.96134	-0.0568813	Neutral
24	p.Arg24Val	0.674177	-0.568802	Neutral	1.0162	0.0231858	Neutral	0.845189	-0.242654	Neutral
24	p.Arg24Tyr	0.657361	-0.605242	Neutral	1.13779	0.186235	Neutral	0.897576	-0.155895	Neutral
24	p.Arg24Cys	0.839896	-0.251717	Neutral	0.746608	-0.421578	Neutral	0.793252	-0.334149	Neutral
24	p.Arg24Trp	0.954309	-0.0674709	Neutral	1.12073	0.164433	Neutral	1.03752	0.0531357	Neutral
24	p.Arg24Phe	0.819776	-0.286698	Neutral	0.938972	-0.0908461	Neutral	0.879374	-0.185451	Neutral
25	p.Val25Asn	1.2329	0.302053	Indeterminate				1.2329	0.302053	Indeterminate
25	p.Val25Lys	1.85895	0.894491	Indeterminate				1.85895	0.894491	Indeterminate
25	p.Val25Thr	1.00117	0.00169291	Neutral				1.00117	0.00169291	Neutral
25	p.Val25Arg	1.36732	0.45135	Indeterminate				1.36732	0.45135	Indeterminate
25	p.Val25Ser	0.876901	-0.189513	Neutral				0.876901	-0.189513	Neutral
25	p.Val25Ile	0.830562	-0.267841	Neutral				0.830562	-0.267841	Neutral
25	p.Val25Met	2.08067	1.05705	Indeterminate				2.08067	1.05705	Indeterminate
25	p.Val25His	0.77895	-0.360397	Neutral				0.77895	-0.360397	Neutral
25	p.Val25Gln	0.763068	-0.390116	Neutral				0.763068	-0.390116	Neutral
25	p.Val25Pro	0.452307	-1.14463	Neutral				0.452307	-1.14463	Neutral
25	p.Val25Leu	0.591462	-0.757643	Neutral				0.591462	-0.757643	Neutral
25	p.Val25Asp	2.01336	1.0096	Indeterminate				2.01336	1.0096	Indeterminate
25	p.Val25Glu	0.885017	-0.176223	Neutral				0.885017	-0.176223	Neutral
25	p.Val25Ala	6.3605	2.66914	Deleterious				6.3605	2.66914	Deleterious
25	p.Val25Gly	2.03596	1.02571	Indeterminate				2.03596	1.02571	Indeterminate
25	p.Val25Val	1	0	Neutral				1	0	Neutral
25	p.Val25Tyr	2.87766	1.5249	Deleterious				2.87766	1.5249	Deleterious
25	p.Val25Cys	0.614074	-0.703516	Neutral				0.614074	-0.703516	Neutral
25	p.Val25Trp	1.20984	0.274811	Indeterminate				1.20984	0.274811	Indeterminate
25	p.Val25Phe	1.13787	0.186336	Neutral				1.13787	0.186336	Neutral
26	p.Glu26Asn	0.814803	-0.295476	Neutral				0.814803	-0.295476	Neutral
26	p.Glu26Lys	0.81719	-0.291256	Neutral				0.81719	-0.291256	Neutral
26	p.Glu26Thr	0.916816	-0.125296	Neutral				0.916816	-0.125296	Neutral
26	p.Glu26Arg	0.89782	-0.155502	Neutral				0.89782	-0.155502	Neutral
26	p.Glu26Ser	1.19129	0.252522	Indeterminate				1.19129	0.252522	Indeterminate
26	p.Glu26Ile	0.953021	-0.0694198	Neutral				0.953021	-0.0694198	Neutral
26	p.Glu26Met	0.864972	-0.209274	Neutral				0.864972	-0.209274	Neutral
26	p.Glu26His	1.06524	0.0911811	Neutral				1.06524	0.0911811	Neutral
26	p.Glu26Gln	1.0516	0.0725898	Neutral				1.0516	0.0725898	Neutral
26	p.Glu26Pro	1.05617	0.0788372	Neutral				1.05617	0.0788372	Neutral
26	p.Glu26Leu	0.841608	-0.24878	Neutral				0.841608	-0.24878	Neutral
26	p.Glu26Asp	0.998763	-0.00178589	Neutral				0.998763	-0.00178589	Neutral
26	p.Glu26Glu	1	0	Neutral				1	0	Neutral
26	p.Glu26Ala	1.06961	0.0970785	Neutral				1.06961	0.0970785	Neutral
26	p.Glu26Gly	1.00449	0.00646003	Neutral				1.00449	0.00646003	Neutral
26	p.Glu26Val	0.980697	-0.02812	Neutral				0.980697	-0.02812	Neutral
26	p.Glu26Tyr	1.11931	0.162613	Neutral				1.11931	0.162613	Neutral
26	p.Glu26Cys	0.948847	-0.0757524	Neutral				0.948847	-0.0757524	Neutral
26	p.Glu26Trp	0.993888	-0.0088452	Neutral				0.993888	-0.0088452	Neutral
26	p.Glu26Phe	1.03652	0.0517497	Neutral				1.03652	0.0517497	Neutral
27	p.Glu27Asn	0.360725	-1.47103	Neutral	0.994016	-0.00865886	Neutral	0.67737	-0.561983	Neutral
27	p.Glu27Lys	0.942132	-0.0859992	Neutral	0.987352	-0.018363	Neutral	0.964742	-0.0517847	Neutral
27	p.Glu27Thr	1.69322	0.759771	Indeterminate	1.12631	0.171607	Neutral	1.40977	0.495457	Indeterminate
27	p.Glu27Arg	0.946472	-0.0793683	Neutral	1.09321	0.128576	Neutral	1.01984	0.0283474	Neutral
27	p.Glu27Ser	0.756616	-0.402367	Neutral	0.98832	-0.0169499	Neutral	0.872468	-0.196826	Neutral
27	p.Glu27Ile	0.661443	-0.59631	Neutral	1.12797	0.173734	Neutral	0.894709	-0.16051	Neutral
27	p.Glu27Met	0.93216	-0.10135	Neutral	1.04501	0.0635155	Neutral	0.988585	-0.0165634	Neutral
27	p.Glu27His	0.891352	-0.165934	Neutral	1.1176	0.160403	Neutral	1.00448	0.00644227	Neutral
27	p.Glu27Gln	0.909411	-0.136996	Neutral	1.07299	0.101639	Neutral	0.991201	-0.0127503	Neutral
27	p.Glu27Pro	1.16212	0.216759	Neutral	1.25659	0.329515	Indeterminate	1.20936	0.274238	Indeterminate
27	p.Glu27Leu	0.56264	-0.829716	Neutral	1.02743	0.0390388	Neutral	0.795035	-0.330911	Neutral
27	p.Glu27Asp	0.776736	-0.364503	Neutral	1.25477	0.327421	Indeterminate	1.01575	0.0225488	Neutral
27	p.Glu27Glu	1	0	Neutral	1	0	Neutral	1	0	Neutral
27	p.Glu27Ala	0.835222	-0.259768	Neutral	1.04622	0.0651815	Neutral	0.940719	-0.0881637	Neutral
27	p.Glu27Gly	0.890587	-0.167171	Neutral	0.965208	-0.0510886	Neutral	0.927898	-0.107963	Neutral
27	p.Glu27Val	0.815582	-0.294097	Neutral	1.07721	0.107301	Neutral	0.946397	-0.0794828	Neutral
27	p.Glu27Tyr	1.83733	0.877613	Indeterminate	0.952229	-0.0706197	Neutral	1.39478	0.480039	Indeterminate
27	p.Glu27Cys	0.858041	-0.220882	Neutral	1.12246	0.166662	Neutral	0.990249	-0.0141361	Neutral
27	p.Glu27Trp	0.783512	-0.351973	Neutral	0.978174	-0.0318367	Neutral	0.880843	-0.183043	Neutral
27	p.Glu27Phe	0.61064	-0.711607	Neutral	0.934668	-0.0974748	Neutral	0.772654	-0.372106	Neutral
28	p.Val28Asn	5.1307	2.35916	Deleterious				5.1307	2.35916	Deleterious
28	p.Val28Lys	7.05341	2.81832	Deleterious				7.05341	2.81832	Deleterious
28	p.Val28Thr	0.754093	-0.407186	Neutral				0.754093	-0.407186	Neutral
28	p.Val28Arg	6.33878	2.6642	Deleterious				6.33878	2.6642	Deleterious
28	p.Val28Ser	1.0606	0.0848759	Neutral				1.0606	0.0848759	Neutral
28	p.Val28Ile	0.789886	-0.340284	Neutral				0.789886	-0.340284	Neutral
28	p.Val28Met	0.729014	-0.455982	Neutral				0.729014	-0.455982	Neutral
28	p.Val28His	6.6658	2.73678	Deleterious				6.6658	2.73678	Deleterious
28	p.Val28Gln	4.4645	2.1585	Deleterious				4.4645	2.1585	Deleterious
28	p.Val28Pro	6.33393	2.6631	Deleterious				6.33393	2.6631	Deleterious
28	p.Val28Leu	0.602813	-0.730218	Neutral				0.602813	-0.730218	Neutral
28	p.Val28Asp	6.26668	2.6477	Deleterious				6.26668	2.6477	Deleterious
28	p.Val28Glu	4.07763	2.02773	Deleterious				4.07763	2.02773	Deleterious
28	p.Val28Ala	0.716061	-0.481846	Neutral				0.716061	-0.481846	Neutral
28	p.Val28Gly	1.75514	0.811584	Indeterminate				1.75514	0.811584	Indeterminate
28	p.Val28Val	1	0	Neutral				1	0	Neutral
28	p.Val28Tyr	6.55886	2.71344	Deleterious				6.55886	2.71344	Deleterious
28	p.Val28Cys	0.703573	-0.507228	Neutral				0.703573	-0.507228	Neutral
28	p.Val28Trp	7.13147	2.8342	Deleterious				7.13147	2.8342	Deleterious
28	p.Val28Phe	4.67995	2.22649	Deleterious				4.67995	2.22649	Deleterious
29	p.Arg29Asn	1.36991	0.45408	Indeterminate				1.36991	0.45408	Indeterminate
29	p.Arg29Lys	0.856739	-0.223072	Neutral				0.856739	-0.223072	Neutral
29	p.Arg29Thr	1.45993	0.545897	Indeterminate				1.45993	0.545897	Indeterminate
29	p.Arg29Arg	1	0	Neutral				1	0	Neutral
29	p.Arg29Ser	1.18892	0.249656	Indeterminate				1.18892	0.249656	Indeterminate
29	p.Arg29Ile	1.90644	0.930881	Indeterminate				1.90644	0.930881	Indeterminate
29	p.Arg29Met	1.05462	0.0767169	Neutral				1.05462	0.0767169	Neutral
29	p.Arg29His	0.925093	-0.112329	Neutral				0.925093	-0.112329	Neutral
29	p.Arg29Gln	0.882419	-0.180465	Neutral				0.882419	-0.180465	Neutral
29	p.Arg29Pro	15.528	3.9568	Deleterious				15.528	3.9568	Deleterious
29	p.Arg29Leu	1.00928	0.0133268	Neutral				1.00928	0.0133268	Neutral
29	p.Arg29Asp	1.88067	0.911249	Indeterminate				1.88067	0.911249	Indeterminate
29	p.Arg29Glu	1.21327	0.278905	Indeterminate				1.21327	0.278905	Indeterminate
29	p.Arg29Ala	0.651378	-0.618433	Neutral				0.651378	-0.618433	Neutral
29	p.Arg29Gly	1.1196	0.16298	Neutral				1.1196	0.16298	Neutral
29	p.Arg29Val	0.929168	-0.105988	Neutral				0.929168	-0.105988	Neutral
29	p.Arg29Tyr	0.868368	-0.203621	Neutral				0.868368	-0.203621	Neutral
29	p.Arg29Cys	1.08921	0.123286	Neutral				1.08921	0.123286	Neutral
29	p.Arg29Trp	0.798922	-0.323873	Neutral				0.798922	-0.323873	Neutral
29	p.Arg29Phe	0.871493	-0.198439	Neutral				0.871493	-0.198439	Neutral
30	p.Ala30Asn	3.66683	1.87453	Deleterious				3.66683	1.87453	Deleterious
30	p.Ala30Lys	0.90289	-0.147378	Neutral				0.90289	-0.147378	Neutral
30	p.Ala30Thr	2.02336	1.01675	Indeterminate				2.02336	1.01675	Indeterminate
30	p.Ala30Arg	1.23258	0.301682	Indeterminate				1.23258	0.301682	Indeterminate
30	p.Ala30Ser	1.48505	0.570515	Indeterminate				1.48505	0.570515	Indeterminate
30	p.Ala30Ile	1.38914	0.47419	Indeterminate				1.38914	0.47419	Indeterminate
30	p.Ala30Met	1.3697	0.453865	Indeterminate				1.3697	0.453865	Indeterminate
30	p.Ala30His	1.26393	0.337915	Indeterminate				1.26393	0.337915	Indeterminate
30	p.Ala30Gln	1.45715	0.543146	Indeterminate				1.45715	0.543146	Indeterminate
30	p.Ala30Pro	2.9088	1.54042	Deleterious				2.9088	1.54042	Deleterious
30	p.Ala30Leu	1.28053	0.356743	Indeterminate				1.28053	0.356743	Indeterminate
30	p.Ala30Asp	2.05265	1.03749	Indeterminate				2.05265	1.03749	Indeterminate
30	p.Ala30Glu	1.0587	0.0822994	Neutral				1.0587	0.0822994	Neutral
30	p.Ala30Ala	1	0	Neutral				1	0	Neutral
30	p.Ala30Gly	3.32912	1.73514	Deleterious				3.32912	1.73514	Deleterious
30	p.Ala30Val	1.56195	0.643352	Indeterminate				1.56195	0.643352	Indeterminate
30	p.Ala30Tyr	1.81322	0.858552	Indeterminate				1.81322	0.858552	Indeterminate
30	p.Ala30Cys	1.66748	0.737668	Indeterminate				1.66748	0.737668	Indeterminate
30	p.Ala30Trp	1.75099	0.808175	Indeterminate				1.75099	0.808175	Indeterminate
30	p.Ala30Phe	1.2151	0.281074	Indeterminate				1.2151	0.281074	Indeterminate
31	p.Leu31Asn	1.51223	0.596678	Indeterminate				1.51223	0.596678	Indeterminate
31	p.Leu31Lys	0.993113	-0.00997003	Neutral				0.993113	-0.00997003	Neutral
31	p.Leu31Thr	1.17554	0.233327	Neutral				1.17554	0.233327	Neutral
31	p.Leu31Arg	1.05269	0.074085	Neutral				1.05269	0.074085	Neutral
31	p.Leu31Ser	1.41452	0.500312	Indeterminate				1.41452	0.500312	Indeterminate
31	p.Leu31Ile	1.00366	0.00526369	Neutral				1.00366	0.00526369	Neutral
31	p.Leu31Met	1.35626	0.439632	Indeterminate				1.35626	0.439632	Indeterminate
31	p.Leu31His	1.05879	0.0824111	Neutral				1.05879	0.0824111	Neutral
31	p.Leu31Gln	1.6825	0.750606	Indeterminate				1.6825	0.750606	Indeterminate
31	p.Leu31Pro	12.4481	3.63785	Deleterious				12.4481	3.63785	Deleterious
31	p.Leu31Leu	1	0	Neutral				1	0	Neutral
31	p.Leu31Asp	3.61337	1.85335	Deleterious				3.61337	1.85335	Deleterious
31	p.Leu31Glu	1.17509	0.232769	Neutral				1.17509	0.232769	Neutral
31	p.Leu31Ala	1.30068	0.379265	Indeterminate				1.30068	0.379265	Indeterminate
31	p.Leu31Gly	1.16536	0.22077	Neutral				1.16536	0.22077	Neutral
31	p.Leu31Val	1.62428	0.699797	Indeterminate				1.62428	0.699797	Indeterminate
31	p.Leu31Tyr	1.97014	0.9783	Indeterminate				1.97014	0.9783	Indeterminate
31	p.Leu31Cys	1.81354	0.858807	Indeterminate				1.81354	0.858807	Indeterminate
31	p.Leu31Trp	1.45057	0.536622	Indeterminate				1.45057	0.536622	Indeterminate
31	p.Leu31Phe	1.0373	0.0528395	Neutral				1.0373	0.0528395	Neutral
32	p.Leu32Asn	2.33468	1.22322	Deleterious	2.61904	1.38904	Deleterious	2.47686	1.30851	Deleterious
32	p.Leu32Lys	2.83177	1.5017	Deleterious	2.84582	1.50885	Deleterious	2.8388	1.50528	Deleterious
32	p.Leu32Thr	1.82159	0.865201	Indeterminate	0.74265	-0.429245	Neutral	1.28212	0.358534	Indeterminate
32	p.Leu32Arg	2.57034	1.36196	Deleterious	2.93223	1.552	Deleterious	2.75129	1.46011	Deleterious
32	p.Leu32Ser	2.43691	1.28505	Deleterious	1.5195	0.6036	Indeterminate	1.97821	0.984193	Indeterminate
32	p.Leu32Ile	0.901397	-0.149765	Neutral	0.558728	-0.839781	Neutral	0.730063	-0.453908	Neutral
32	p.Leu32Met	1.12239	0.166571	Neutral	0.547949	-0.867888	Neutral	0.835168	-0.259861	Neutral
32	p.Leu32His	2.72445	1.44596	Deleterious	2.47992	1.31029	Deleterious	2.60218	1.37972	Deleterious
32	p.Leu32Gln	1.65059	0.722979	Indeterminate	1.5714	0.652046	Indeterminate	1.61099	0.687948	Indeterminate
32	p.Leu32Pro	2.99521	1.58266	Deleterious	3.39695	1.76424	Deleterious	3.19608	1.6763	Deleterious
32	p.Leu32Leu	1	0	Neutral	1	0	Neutral	1	0	Neutral
32	p.Leu32Asp	2.58085	1.36785	Deleterious	3.30074	1.72279	Deleterious	2.9408	1.55621	Deleterious
32	p.Leu32Glu	2.89573	1.53393	Deleterious	2.82006	1.49573	Deleterious	2.8579	1.51495	Deleterious
32	p.Leu32Ala	1.13423	0.181713	Neutral	1.15934	0.213299	Neutral	1.14678	0.197593	Neutral
32	p.Leu32Gly	2.72003	1.44362	Deleterious	2.46969	1.30433	Deleterious	2.59486	1.37566	Deleterious
32	p.Leu32Val	1.07617	0.105913	Neutral	0.574299	-0.800126	Neutral	0.825237	-0.27712	Neutral
32	p.Leu32Tyr	2.24095	1.16411	Deleterious	2.49677	1.32007	Deleterious	2.36886	1.2442	Deleterious
32	p.Leu32Cys	1.196	0.258213	Indeterminate	0.507927	-0.977306	Neutral	0.851962	-0.231139	Neutral
32	p.Leu32Trp	2.63933	1.40017	Deleterious	2.78663	1.47852	Deleterious	2.71298	1.43988	Deleterious
32	p.Leu32Phe	1.36211	0.445841	Indeterminate	0.722019	-0.469891	Neutral	1.04206	0.0594436	Neutral
33	p.Glu33Asn	0.893507	-0.162449	Neutral				0.893507	-0.162449	Neutral
33	p.Glu33Lys	0.99486	-0.00743403	Neutral				0.99486	-0.00743403	Neutral
33	p.Glu33Thr	0.951322	-0.0719942	Neutral				0.951322	-0.0719942	Neutral
33	p.Glu33Arg	0.887276	-0.172546	Neutral				0.887276	-0.172546	Neutral
33	p.Glu33Ser	0.999212	-0.00113707	Neutral				0.999212	-0.00113707	Neutral
33	p.Glu33Ile	0.89276	-0.163655	Neutral				0.89276	-0.163655	Neutral
33	p.Glu33Met	0.884546	-0.176991	Neutral				0.884546	-0.176991	Neutral
33	p.Glu33His	0.962245	-0.055524	Neutral				0.962245	-0.055524	Neutral
33	p.Glu33Gln	0.985236	-0.0214581	Neutral				0.985236	-0.0214581	Neutral
33	p.Glu33Pro	0.819468	-0.287241	Neutral				0.819468	-0.287241	Neutral
33	p.Glu33Leu	1.03187	0.0452652	Neutral				1.03187	0.0452652	Neutral
33	p.Glu33Asp	0.84292	-0.246532	Neutral				0.84292	-0.246532	Neutral
33	p.Glu33Glu	1	0	Neutral				1	0	Neutral
33	p.Glu33Ala	1.03058	0.043455	Neutral				1.03058	0.043455	Neutral
33	p.Glu33Gly	0.948721	-0.0759446	Neutral				0.948721	-0.0759446	Neutral
33	p.Glu33Val	0.926976	-0.109396	Neutral				0.926976	-0.109396	Neutral
33	p.Glu33Tyr	0.931107	-0.102982	Neutral				0.931107	-0.102982	Neutral
33	p.Glu33Cys	0.976635	-0.0341083	Neutral				0.976635	-0.0341083	Neutral
33	p.Glu33Trp	0.896029	-0.158383	Neutral				0.896029	-0.158383	Neutral
33	p.Glu33Phe	0.951022	-0.0724496	Neutral				0.951022	-0.0724496	Neutral
34	p.Ala34Asn	1.00894	0.0128437	Neutral	1.19945	0.262373	Indeterminate	1.1042	0.142996	Neutral
34	p.Ala34Lys	1.00864	0.0124137	Neutral	0.956838	-0.0636539	Neutral	0.98274	-0.0251188	Neutral
34	p.Ala34Thr	0.830614	-0.26775	Neutral	1.12073	0.164439	Neutral	0.975672	-0.0355316	Neutral
34	p.Ala34Arg	0.933547	-0.0992052	Neutral	0.947116	-0.0783875	Neutral	0.940331	-0.0887588	Neutral
34	p.Ala34Ser	0.682462	-0.55118	Neutral	0.961334	-0.0568896	Neutral	0.821898	-0.282969	Neutral
34	p.Ala34Ile	0.834767	-0.260554	Neutral	0.816235	-0.292944	Neutral	0.825501	-0.276658	Neutral
34	p.Ala34Met	1.08709	0.120474	Neutral	0.882947	-0.179601	Neutral	0.98502	-0.0217756	Neutral
34	p.Ala34His	0.714194	-0.485612	Neutral	0.820758	-0.284972	Neutral	0.767476	-0.381807	Neutral
34	p.Ala34Gln	1.11868	0.161793	Neutral	1.1647	0.219956	Neutral	1.14169	0.191168	Neutral
34	p.Ala34Pro	1.45379	0.539819	Indeterminate	1.14694	0.197793	Neutral	1.30037	0.378918	Indeterminate
34	p.Ala34Leu	0.95604	-0.0648565	Neutral	0.990559	-0.0136847	Neutral	0.9733	-0.0390437	Neutral
34	p.Ala34Asp	1.13392	0.181325	Neutral	0.90491	-0.144154	Neutral	1.01942	0.0277447	Neutral
34	p.Ala34Glu	1.19042	0.251476	Indeterminate	0.989667	-0.0149853	Neutral	1.09005	0.124389	Neutral
34	p.Ala34Ala	1	0	Neutral	1	0	Neutral	1	0	Neutral
34	p.Ala34Gly	1.18666	0.246902	Indeterminate	0.811294	-0.301703	Neutral	0.998975	-0.00147905	Neutral
34	p.Ala34Val	1.33654	0.418507	Indeterminate	0.92102	-0.118696	Neutral	1.12878	0.174766	Neutral
34	p.Ala34Tyr	0.75142	-0.412308	Neutral	1.00393	0.00565709	Neutral	0.877675	-0.188242	Neutral
34	p.Ala34Cys	0.975095	-0.0363856	Neutral	0.782354	-0.354107	Neutral	0.878724	-0.186517	Neutral
34	p.Ala34Trp	0.987596	-0.0180069	Neutral	0.877481	-0.188561	Neutral	0.932538	-0.100765	Neutral
34	p.Ala34Phe	1.06322	0.0884419	Neutral	0.869946	-0.201002	Neutral	0.966584	-0.0490336	Neutral
35	p.Gly35Asn	1.69215	0.758857	Indeterminate	1.29633	0.374434	Indeterminate	1.49424	0.579412	Indeterminate
35	p.Gly35Lys	2.03795	1.02712	Indeterminate	1.61261	0.689399	Indeterminate	1.82528	0.868119	Indeterminate
35	p.Gly35Thr	2.6309	1.39556	Deleterious	2.16275	1.11287	Deleterious	2.39683	1.26113	Deleterious
35	p.Gly35Arg	1.39552	0.480803	Indeterminate	1.46079	0.546748	Indeterminate	1.42815	0.514153	Indeterminate
35	p.Gly35Ser	1.92598	0.945594	Indeterminate	1.53494	0.618179	Indeterminate	1.73046	0.791155	Indeterminate
35	p.Gly35Ile	8.80436	3.13822	Deleterious	4.33687	2.11665	Deleterious	6.57061	2.71603	Deleterious
35	p.Gly35Met	2.3981	1.26189	Deleterious	2.06821	1.04838	Indeterminate	2.23315	1.15908	Deleterious
35	p.Gly35His	1.44634	0.532405	Indeterminate	1.47555	0.561248	Indeterminate	1.46094	0.546899	Indeterminate
35	p.Gly35Gln	1.93779	0.954413	Indeterminate	1.98423	0.98858	Indeterminate	1.96101	0.971597	Indeterminate
35	p.Gly35Pro	14.3147	3.83942	Deleterious	6.09097	2.60667	Deleterious	10.2028	3.3509	Deleterious
35	p.Gly35Leu	3.89011	1.95981	Deleterious	2.61752	1.3882	Deleterious	3.25381	1.70213	Deleterious
35	p.Gly35Asp	2.28082	1.18955	Deleterious	1.52162	0.605606	Indeterminate	1.90122	0.926925	Indeterminate
35	p.Gly35Glu	1.73081	0.791446	Indeterminate	1.80875	0.854995	Indeterminate	1.76978	0.82357	Indeterminate
35	p.Gly35Ala	1.63119	0.705928	Indeterminate	1.5212	0.605214	Indeterminate	1.5762	0.65645	Indeterminate
35	p.Gly35Gly	1	0	Neutral	1	0	Neutral	1	0	Neutral
35	p.Gly35Val	6.32108	2.66017	Deleterious	3.4449	1.78446	Deleterious	4.88299	2.28777	Deleterious
35	p.Gly35Tyr	2.54765	1.34917	Deleterious	1.58215	0.661883	Indeterminate	2.0649	1.04607	Indeterminate
35	p.Gly35Cys	2.11811	1.08277	Indeterminate	1.65244	0.724598	Indeterminate	1.88527	0.914773	Indeterminate
35	p.Gly35Trp	3.6879	1.8828	Deleterious	2.44109	1.28752	Deleterious	3.06449	1.61565	Deleterious
35	p.Gly35Phe	1.95628	0.968109	Indeterminate	1.63506	0.709341	Indeterminate	1.79567	0.844519	Indeterminate
36	p.Ala36Asn	2.15218	1.1058	Deleterious				2.15218	1.1058	Deleterious
36	p.Ala36Lys	8.34506	3.06092	Deleterious				8.34506	3.06092	Deleterious
36	p.Ala36Thr	1.53672	0.619851	Indeterminate				1.53672	0.619851	Indeterminate
36	p.Ala36Arg	0.97917	-0.0303692	Neutral				0.97917	-0.0303692	Neutral
36	p.Ala36Ser	1.1975	0.26002	Indeterminate				1.1975	0.26002	Indeterminate
36	p.Ala36Ile	0.850226	-0.234082	Neutral				0.850226	-0.234082	Neutral
36	p.Ala36Met	0.128541	-2.9597	Neutral				0.128541	-2.9597	Neutral
36	p.Ala36His	0.75255	-0.41014	Neutral				0.75255	-0.41014	Neutral
36	p.Ala36Gln	0.81124	-0.301799	Neutral				0.81124	-0.301799	Neutral
36	p.Ala36Pro	3.99945	1.9998	Deleterious				3.99945	1.9998	Deleterious
36	p.Ala36Leu	1.5527	0.63478	Indeterminate				1.5527	0.63478	Indeterminate
36	p.Ala36Asp	1.15275	0.205077	Neutral				1.15275	0.205077	Neutral
36	p.Ala36Glu	1.66616	0.736526	Indeterminate				1.66616	0.736526	Indeterminate
36	p.Ala36Ala	1	0	Neutral				1	0	Neutral
36	p.Ala36Gly	1.33712	0.419132	Indeterminate				1.33712	0.419132	Indeterminate
36	p.Ala36Val	0.823962	-0.27935	Neutral				0.823962	-0.27935	Neutral
36	p.Ala36Tyr	1.31503	0.395098	Indeterminate				1.31503	0.395098	Indeterminate
36	p.Ala36Cys	0.225236	-2.15049	Neutral				0.225236	-2.15049	Neutral
36	p.Ala36Trp	0.654581	-0.611356	Neutral				0.654581	-0.611356	Neutral
36	p.Ala36Phe	1.23425	0.303632	Indeterminate				1.23425	0.303632	Indeterminate
37	p.Leu37Asn	0.783223	-0.352504	Neutral				0.783223	-0.352504	Neutral
37	p.Leu37Lys	1.29202	0.369624	Indeterminate				1.29202	0.369624	Indeterminate
37	p.Leu37Thr	1.40252	0.488026	Indeterminate				1.40252	0.488026	Indeterminate
37	p.Leu37Arg	0.425078	-1.2342	Neutral				0.425078	-1.2342	Neutral
37	p.Leu37Ser	0.979382	-0.0300564	Neutral				0.979382	-0.0300564	Neutral
37	p.Leu37Ile	1.73402	0.794121	Indeterminate				1.73402	0.794121	Indeterminate
37	p.Leu37Met	0.635246	-0.654613	Neutral				0.635246	-0.654613	Neutral
37	p.Leu37His	1.394	0.479226	Indeterminate				1.394	0.479226	Indeterminate
37	p.Leu37Gln	1.6567	0.728308	Indeterminate				1.6567	0.728308	Indeterminate
37	p.Leu37Pro	1.89604	0.922987	Indeterminate				1.89604	0.922987	Indeterminate
37	p.Leu37Leu	1	0	Neutral				1	0	Neutral
37	p.Leu37Asp	1.03608	0.0511292	Neutral				1.03608	0.0511292	Neutral
37	p.Leu37Glu	1.00883	0.0126781	Neutral				1.00883	0.0126781	Neutral
37	p.Leu37Ala	0.736571	-0.441104	Neutral				0.736571	-0.441104	Neutral
37	p.Leu37Gly	0.960263	-0.058498	Neutral				0.960263	-0.058498	Neutral
37	p.Leu37Val	1.51213	0.59658	Indeterminate				1.51213	0.59658	Indeterminate
37	p.Leu37Tyr	1.24885	0.320601	Indeterminate				1.24885	0.320601	Indeterminate
37	p.Leu37Cys	0.844494	-0.24384	Neutral				0.844494	-0.24384	Neutral
37	p.Leu37Trp	6.84073	2.77415	Deleterious				6.84073	2.77415	Deleterious
37	p.Leu37Phe	0.772337	-0.372698	Neutral				0.772337	-0.372698	Neutral
38	p.Pro38Asn	3.11168	1.63769	Deleterious				3.11168	1.63769	Deleterious
38	p.Pro38Lys	3.68137	1.88024	Deleterious				3.68137	1.88024	Deleterious
38	p.Pro38Thr	1.33576	0.417663	Indeterminate				1.33576	0.417663	Indeterminate
38	p.Pro38Arg	5.03905	2.33315	Deleterious				5.03905	2.33315	Deleterious
38	p.Pro38Ser	1.73136	0.791908	Indeterminate				1.73136	0.791908	Indeterminate
38	p.Pro38Ile	1.76835	0.822402	Indeterminate				1.76835	0.822402	Indeterminate
38	p.Pro38Met	2.30123	1.20241	Deleterious				2.30123	1.20241	Deleterious
38	p.Pro38His	3.7958	1.9244	Deleterious				3.7958	1.9244	Deleterious
38	p.Pro38Gln	4.07957	2.02842	Deleterious				4.07957	2.02842	Deleterious
38	p.Pro38Pro	1	0	Neutral				1	0	Neutral
38	p.Pro38Leu	3.21804	1.68618	Deleterious				3.21804	1.68618	Deleterious
38	p.Pro38Asp	20.4439	4.3536	Deleterious				20.4439	4.3536	Deleterious
38	p.Pro38Glu	2.65109	1.40659	Deleterious				2.65109	1.40659	Deleterious
38	p.Pro38Ala	5.5853	2.48163	Deleterious				5.5853	2.48163	Deleterious
38	p.Pro38Gly	0.989231	-0.01562	Neutral				0.989231	-0.01562	Neutral
38	p.Pro38Val	1.02128	0.0303784	Neutral				1.02128	0.0303784	Neutral
38	p.Pro38Tyr	3.40095	1.76594	Deleterious				3.40095	1.76594	Deleterious
38	p.Pro38Cys	0.754161	-0.407056	Neutral				0.754161	-0.407056	Neutral
38	p.Pro38Trp	31.1088	4.95925	Deleterious				31.1088	4.95925	Deleterious
38	p.Pro38Phe	4.50838	2.17261	Deleterious				4.50838	2.17261	Deleterious
39	p.Asn39Asn	1	0	Neutral				1	0	Neutral
39	p.Asn39Lys	2.12982	1.09073	Deleterious				2.12982	1.09073	Deleterious
39	p.Asn39Thr	0.634856	-0.655498	Neutral				0.634856	-0.655498	Neutral
39	p.Asn39Arg	1.1182	0.161183	Neutral				1.1182	0.161183	Neutral
39	p.Asn39Ser	1.16644	0.222107	Neutral				1.16644	0.222107	Neutral
39	p.Asn39Ile	1.44734	0.533406	Indeterminate				1.44734	0.533406	Indeterminate
39	p.Asn39Met	2.19998	1.13749	Deleterious				2.19998	1.13749	Deleterious
39	p.Asn39His	0.705647	-0.502981	Neutral				0.705647	-0.502981	Neutral
39	p.Asn39Gln	0.931883	-0.10178	Neutral				0.931883	-0.10178	Neutral
39	p.Asn39Pro	14.4623	3.85422	Deleterious				14.4623	3.85422	Deleterious
39	p.Asn39Leu	4.16636	2.05879	Deleterious				4.16636	2.05879	Deleterious
39	p.Asn39Asp	1.04102	0.0579985	Neutral				1.04102	0.0579985	Neutral
39	p.Asn39Glu	1.18411	0.243803	Indeterminate				1.18411	0.243803	Indeterminate
39	p.Asn39Ala	1.29678	0.374935	Indeterminate				1.29678	0.374935	Indeterminate
39	p.Asn39Gly	0.97845	-0.0314297	Neutral				0.97845	-0.0314297	Neutral
39	p.Asn39Val	1.33106	0.412574	Indeterminate				1.33106	0.412574	Indeterminate
39	p.Asn39Tyr	0.886856	-0.173228	Neutral				0.886856	-0.173228	Neutral
39	p.Asn39Cys	4.54731	2.18501	Deleterious				4.54731	2.18501	Deleterious
39	p.Asn39Trp	1.63831	0.712206	Indeterminate				1.63831	0.712206	Indeterminate
39	p.Asn39Phe	8.47303	3.08288	Deleterious				8.47303	3.08288	Deleterious
40	p.Ala40Asn	1.36628	0.450256	Indeterminate				1.36628	0.450256	Indeterminate
40	p.Ala40Lys	1.10913	0.149427	Neutral				1.10913	0.149427	Neutral
40	p.Ala40Thr	7.74834	2.95389	Deleterious				7.74834	2.95389	Deleterious
40	p.Ala40Arg	0.997313	-0.00388117	Neutral				0.997313	-0.00388117	Neutral
40	p.Ala40Ser	0.726454	-0.461057	Neutral				0.726454	-0.461057	Neutral
40	p.Ala40Ile	1.11666	0.159185	Neutral				1.11666	0.159185	Neutral
40	p.Ala40Met	0.601338	-0.733752	Neutral				0.601338	-0.733752	Neutral
40	p.Ala40His	0.737132	-0.440005	Neutral				0.737132	-0.440005	Neutral
40	p.Ala40Gln	0.606976	-0.720288	Neutral				0.606976	-0.720288	Neutral
40	p.Ala40Pro	1.49653	0.581623	Indeterminate				1.49653	0.581623	Indeterminate
40	p.Ala40Leu	3.93022	1.97461	Deleterious				3.93022	1.97461	Deleterious
40	p.Ala40Asp	1.65927	0.73055	Indeterminate				1.65927	0.73055	Indeterminate
40	p.Ala40Glu	0.78604	-0.347325	Neutral				0.78604	-0.347325	Neutral
40	p.Ala40Ala	1	0	Neutral				1	0	Neutral
40	p.Ala40Gly	1.03429	0.0486439	Neutral				1.03429	0.0486439	Neutral
40	p.Ala40Val	1.3817	0.466449	Indeterminate				1.3817	0.466449	Indeterminate
40	p.Ala40Tyr	0.734772	-0.444632	Neutral				0.734772	-0.444632	Neutral
40	p.Ala40Cys	1.00807	0.0115907	Neutral				1.00807	0.0115907	Neutral
40	p.Ala40Trp	1.16541	0.220841	Neutral				1.16541	0.220841	Neutral
40	p.Ala40Phe	1.11962	0.163014	Neutral				1.11962	0.163014	Neutral
41	p.Pro41Asn	0.920704	-0.119191	Neutral				0.920704	-0.119191	Neutral
41	p.Pro41Lys	1.27874	0.354728	Indeterminate				1.27874	0.354728	Indeterminate
41	p.Pro41Thr	1.03031	0.0430837	Neutral				1.03031	0.0430837	Neutral
41	p.Pro41Arg	2.29414	1.19795	Deleterious				2.29414	1.19795	Deleterious
41	p.Pro41Ser	0.966845	-0.0486434	Neutral				0.966845	-0.0486434	Neutral
41	p.Pro41Ile	1.60573	0.683228	Indeterminate				1.60573	0.683228	Indeterminate
41	p.Pro41Met	0.775227	-0.367308	Neutral				0.775227	-0.367308	Neutral
41	p.Pro41His	1.79087	0.84066	Indeterminate				1.79087	0.84066	Indeterminate
41	p.Pro41Gln	1.28918	0.366452	Indeterminate				1.28918	0.366452	Indeterminate
41	p.Pro41Pro	1	0	Neutral				1	0	Neutral
41	p.Pro41Leu	0.789924	-0.340213	Neutral				0.789924	-0.340213	Neutral
41	p.Pro41Asp	1.27597	0.351594	Indeterminate				1.27597	0.351594	Indeterminate
41	p.Pro41Glu	0.902011	-0.148783	Neutral				0.902011	-0.148783	Neutral
41	p.Pro41Ala	1.00447	0.00643186	Neutral				1.00447	0.00643186	Neutral
41	p.Pro41Gly	1.0625	0.0874628	Neutral				1.0625	0.0874628	Neutral
41	p.Pro41Val	1.09175	0.126646	Neutral				1.09175	0.126646	Neutral
41	p.Pro41Tyr	2.09583	1.06752	Indeterminate				2.09583	1.06752	Indeterminate
41	p.Pro41Cys	1.3213	0.40196	Indeterminate				1.3213	0.40196	Indeterminate
41	p.Pro41Trp	1.43128	0.517305	Indeterminate				1.43128	0.517305	Indeterminate
41	p.Pro41Phe	1.52308	0.606993	Indeterminate				1.52308	0.606993	Indeterminate
42	p.Asn42Asn	1	0	Neutral				1	0	Neutral
42	p.Asn42Lys	12.537	3.64812	Deleterious				12.537	3.64812	Deleterious
42	p.Asn42Thr	1.32418	0.405097	Indeterminate				1.32418	0.405097	Indeterminate
42	p.Asn42Arg	11.6511	3.5424	Deleterious				11.6511	3.5424	Deleterious
42	p.Asn42Ser	1.22178	0.288983	Indeterminate				1.22178	0.288983	Indeterminate
42	p.Asn42Ile	11.5734	3.53275	Deleterious				11.5734	3.53275	Deleterious
42	p.Asn42Met	9.76754	3.288	Deleterious				9.76754	3.288	Deleterious
42	p.Asn42His	7.33096	2.874	Deleterious				7.33096	2.874	Deleterious
42	p.Asn42Gln	7.10185	2.8282	Deleterious				7.10185	2.8282	Deleterious
42	p.Asn42Pro	10.8252	3.43633	Deleterious				10.8252	3.43633	Deleterious
42	p.Asn42Leu	11.4264	3.51429	Deleterious				11.4264	3.51429	Deleterious
42	p.Asn42Asp	1.61107	0.688015	Indeterminate				1.61107	0.688015	Indeterminate
42	p.Asn42Glu	12.4844	3.64205	Deleterious				12.4844	3.64205	Deleterious
42	p.Asn42Ala	1.14632	0.197013	Neutral				1.14632	0.197013	Neutral
42	p.Asn42Gly	0.941666	-0.0867125	Neutral				0.941666	-0.0867125	Neutral
42	p.Asn42Val	9.98514	3.31978	Deleterious				9.98514	3.31978	Deleterious
42	p.Asn42Tyr	11.8715	3.56943	Deleterious				11.8715	3.56943	Deleterious
42	p.Asn42Cys	1.48413	0.569618	Indeterminate				1.48413	0.569618	Indeterminate
42	p.Asn42Trp	14.6526	3.87309	Deleterious				14.6526	3.87309	Deleterious
42	p.Asn42Phe	12.6096	3.65645	Deleterious				12.6096	3.65645	Deleterious
43	p.Ser43Asn	1.10155	0.139531	Neutral				1.10155	0.139531	Neutral
43	p.Ser43Lys	1.03947	0.0558432	Neutral				1.03947	0.0558432	Neutral
43	p.Ser43Thr	0.969863	-0.0441465	Neutral				0.969863	-0.0441465	Neutral
43	p.Ser43Arg	0.99486	-0.00743409	Neutral				0.99486	-0.00743409	Neutral
43	p.Ser43Ser	1	0	Neutral				1	0	Neutral
43	p.Ser43Ile	1.25237	0.324666	Indeterminate				1.25237	0.324666	Indeterminate
43	p.Ser43Met	1.0922	0.127239	Neutral				1.0922	0.127239	Neutral
43	p.Ser43His	0.995103	-0.00708183	Neutral				0.995103	-0.00708183	Neutral
43	p.Ser43Gln	0.999649	-0.000506339	Neutral				0.999649	-0.000506339	Neutral
43	p.Ser43Pro	0.994407	-0.00809125	Neutral				0.994407	-0.00809125	Neutral
43	p.Ser43Leu	1.05787	0.0811663	Neutral				1.05787	0.0811663	Neutral
43	p.Ser43Asp	1.08943	0.12357	Neutral				1.08943	0.12357	Neutral
43	p.Ser43Glu	1.02056	0.0293636	Neutral				1.02056	0.0293636	Neutral
43	p.Ser43Ala	0.968945	-0.0455132	Neutral				0.968945	-0.0455132	Neutral
43	p.Ser43Gly	0.943487	-0.0839252	Neutral				0.943487	-0.0839252	Neutral
43	p.Ser43Val	1.09464	0.13046	Neutral				1.09464	0.13046	Neutral
43	p.Ser43Tyr	1.06953	0.0969717	Neutral				1.06953	0.0969717	Neutral
43	p.Ser43Cys	1.05802	0.0813689	Neutral				1.05802	0.0813689	Neutral
43	p.Ser43Trp	1.1083	0.148343	Neutral				1.1083	0.148343	Neutral
43	p.Ser43Phe	1.05445	0.0764933	Neutral				1.05445	0.0764933	Neutral
44	p.Tyr44Asn	1.21069	0.275828	Indeterminate				1.21069	0.275828	Indeterminate
44	p.Tyr44Lys	1.20701	0.271442	Indeterminate				1.20701	0.271442	Indeterminate
44	p.Tyr44Thr	0.987444	-0.0182295	Neutral				0.987444	-0.0182295	Neutral
44	p.Tyr44Arg	1.02874	0.0408793	Neutral				1.02874	0.0408793	Neutral
44	p.Tyr44Ser	1.08866	0.122547	Neutral				1.08866	0.122547	Neutral
44	p.Tyr44Ile	1.0477	0.0672247	Neutral				1.0477	0.0672247	Neutral
44	p.Tyr44Met	1.08996	0.124273	Neutral				1.08996	0.124273	Neutral
44	p.Tyr44His	1.10331	0.141842	Neutral				1.10331	0.141842	Neutral
44	p.Tyr44Gln	1.27931	0.355366	Indeterminate				1.27931	0.355366	Indeterminate
44	p.Tyr44Pro	2.30289	1.20344	Deleterious				2.30289	1.20344	Deleterious
44	p.Tyr44Leu	1.09132	0.126076	Neutral				1.09132	0.126076	Neutral
44	p.Tyr44Asp	1.23984	0.310158	Indeterminate				1.23984	0.310158	Indeterminate
44	p.Tyr44Glu	1.39564	0.480924	Indeterminate				1.39564	0.480924	Indeterminate
44	p.Tyr44Ala	1.82353	0.866736	Indeterminate				1.82353	0.866736	Indeterminate
44	p.Tyr44Gly	1.37764	0.462194	Indeterminate				1.37764	0.462194	Indeterminate
44	p.Tyr44Val	1.09258	0.12774	Neutral				1.09258	0.12774	Neutral
44	p.Tyr44Tyr	1	0	Neutral				1	0	Neutral
44	p.Tyr44Cys	0.966449	-0.0492338	Neutral				0.966449	-0.0492338	Neutral
44	p.Tyr44Trp	1.10328	0.141805	Neutral				1.10328	0.141805	Neutral
44	p.Tyr44Phe	1.04742	0.066844	Neutral				1.04742	0.066844	Neutral
45	p.Gly45Asn	0.712863	-0.488304	Neutral	1.15594	0.209073	Neutral	0.934404	-0.0978819	Neutral
45	p.Gly45Lys	1.33527	0.417128	Indeterminate	1.13987	0.188874	Neutral	1.23757	0.30751	Indeterminate
45	p.Gly45Thr	0.641713	-0.64	Neutral	1.12521	0.170196	Neutral	0.883462	-0.17876	Neutral
45	p.Gly45Arg	0.96443	-0.0522511	Neutral	1.11383	0.155535	Neutral	1.03913	0.0553796	Neutral
45	p.Gly45Ser	1.93074	0.949151	Indeterminate	1.08697	0.120308	Neutral	1.50885	0.593451	Indeterminate
45	p.Gly45Ile	1.92472	0.944645	Indeterminate	1.20315	0.266817	Indeterminate	1.56393	0.645179	Indeterminate
45	p.Gly45Met	1.24185	0.312485	Indeterminate	1.11658	0.159091	Neutral	1.17921	0.237826	Neutral
45	p.Gly45His	1.10278	0.14114	Neutral	1.1213	0.165178	Neutral	1.11204	0.153209	Neutral
45	p.Gly45Gln	0.715563	-0.482849	Neutral	1.02468	0.0351769	Neutral	0.870123	-0.200709	Neutral
45	p.Gly45Pro	49.1387	5.61879	Deleterious	4.40078	2.13776	Deleterious	26.7698	4.74253	Deleterious
45	p.Gly45Leu	1.14719	0.198111	Neutral	1.10777	0.147654	Neutral	1.12748	0.173103	Neutral
45	p.Gly45Asp	0.714546	-0.484901	Neutral	1.05217	0.0733624	Neutral	0.883356	-0.178933	Neutral
45	p.Gly45Glu	1.08693	0.120264	Neutral	1.07841	0.108903	Neutral	1.08267	0.114595	Neutral
45	p.Gly45Ala	0.633894	-0.657687	Neutral	1.13309	0.180263	Neutral	0.883492	-0.178711	Neutral
45	p.Gly45Gly	1	0	Neutral	1	0	Neutral	1	0	Neutral
45	p.Gly45Val	1.91045	0.933915	Indeterminate	1.26508	0.339229	Indeterminate	1.58777	0.666999	Indeterminate
45	p.Gly45Tyr	0.725545	-0.462862	Neutral	1.25901	0.332287	Indeterminate	0.992276	-0.0111859	Neutral
45	p.Gly45Cys	0.850442	-0.233714	Neutral	1.09206	0.12705	Neutral	0.971251	-0.0420847	Neutral
45	p.Gly45Trp	1.03704	0.0524674	Neutral	1.24252	0.313268	Indeterminate	1.13978	0.188753	Neutral
45	p.Gly45Phe	0.89711	-0.156644	Neutral	1.02251	0.0321107	Neutral	0.959808	-0.0591818	Neutral
46	p.Arg46Asn	0.915068	-0.128048	Neutral				0.915068	-0.128048	Neutral
46	p.Arg46Lys	0.791542	-0.337262	Neutral				0.791542	-0.337262	Neutral
46	p.Arg46Thr	2.60593	1.3818	Deleterious				2.60593	1.3818	Deleterious
46	p.Arg46Arg	1	0	Neutral				1	0	Neutral
46	p.Arg46Ser	0.850967	-0.232826	Neutral				0.850967	-0.232826	Neutral
46	p.Arg46Ile	3.53784	1.82287	Deleterious				3.53784	1.82287	Deleterious
46	p.Arg46Met	1.31102	0.390689	Indeterminate				1.31102	0.390689	Indeterminate
46	p.Arg46His	0.79263	-0.33528	Neutral				0.79263	-0.33528	Neutral
46	p.Arg46Gln	1.54108	0.623944	Indeterminate				1.54108	0.623944	Indeterminate
46	p.Arg46Pro	17.7958	4.15346	Deleterious				17.7958	4.15346	Deleterious
46	p.Arg46Leu	1.44235	0.528417	Indeterminate				1.44235	0.528417	Indeterminate
46	p.Arg46Asp	5.91613	2.56465	Deleterious				5.91613	2.56465	Deleterious
46	p.Arg46Glu	3.01844	1.5938	Deleterious				3.01844	1.5938	Deleterious
46	p.Arg46Ala	1.39293	0.478127	Indeterminate				1.39293	0.478127	Indeterminate
46	p.Arg46Gly	1.35526	0.43857	Indeterminate				1.35526	0.43857	Indeterminate
46	p.Arg46Val	1.8849	0.914486	Indeterminate				1.8849	0.914486	Indeterminate
46	p.Arg46Tyr	1.75302	0.809842	Indeterminate				1.75302	0.809842	Indeterminate
46	p.Arg46Cys	1.3563	0.439672	Indeterminate				1.3563	0.439672	Indeterminate
46	p.Arg46Trp	0.81031	-0.303454	Neutral				0.81031	-0.303454	Neutral
46	p.Arg46Phe	1.03613	0.05121	Neutral				1.03613	0.05121	Neutral
47	p.Arg47Asn	0.911269	-0.13405	Neutral				0.911269	-0.13405	Neutral
47	p.Arg47Lys	0.990936	-0.0131356	Neutral				0.990936	-0.0131356	Neutral
47	p.Arg47Thr	0.987023	-0.0188439	Neutral				0.987023	-0.0188439	Neutral
47	p.Arg47Arg	1	0	Neutral				1	0	Neutral
47	p.Arg47Ser	1.32442	0.405363	Indeterminate				1.32442	0.405363	Indeterminate
47	p.Arg47Ile	1.03884	0.0549748	Neutral				1.03884	0.0549748	Neutral
47	p.Arg47Met	1.05671	0.0795763	Neutral				1.05671	0.0795763	Neutral
47	p.Arg47His	1.06273	0.0877803	Neutral				1.06273	0.0877803	Neutral
47	p.Arg47Gln	1.50091	0.585834	Indeterminate				1.50091	0.585834	Indeterminate
47	p.Arg47Pro	1.59604	0.674496	Indeterminate				1.59604	0.674496	Indeterminate
47	p.Arg47Leu	0.862647	-0.213157	Neutral				0.862647	-0.213157	Neutral
47	p.Arg47Asp	3.53218	1.82056	Deleterious				3.53218	1.82056	Deleterious
47	p.Arg47Glu	1.27164	0.346695	Indeterminate				1.27164	0.346695	Indeterminate
47	p.Arg47Ala	0.994861	-0.00743375	Neutral				0.994861	-0.00743375	Neutral
47	p.Arg47Gly	1.42476	0.510717	Indeterminate				1.42476	0.510717	Indeterminate
47	p.Arg47Val	0.973027	-0.0394481	Neutral				0.973027	-0.0394481	Neutral
47	p.Arg47Tyr	1.13762	0.186013	Neutral				1.13762	0.186013	Neutral
47	p.Arg47Cys	0.88547	-0.175485	Neutral				0.88547	-0.175485	Neutral
47	p.Arg47Trp	1.20047	0.263599	Indeterminate				1.20047	0.263599	Indeterminate
47	p.Arg47Phe	0.889138	-0.169521	Neutral				0.889138	-0.169521	Neutral
48	p.Pro48Asn	13.2311	3.72586	Deleterious				13.2311	3.72586	Deleterious
48	p.Pro48Lys	15.4224	3.94696	Deleterious				15.4224	3.94696	Deleterious
48	p.Pro48Thr	2.12947	1.09049	Deleterious				2.12947	1.09049	Deleterious
48	p.Pro48Arg	13.4	3.74416	Deleterious				13.4	3.74416	Deleterious
48	p.Pro48Ser	1.49961	0.584589	Indeterminate				1.49961	0.584589	Indeterminate
48	p.Pro48Ile	7.83122	2.96924	Deleterious				7.83122	2.96924	Deleterious
48	p.Pro48Met	11.9056	3.57357	Deleterious				11.9056	3.57357	Deleterious
48	p.Pro48His	11.5352	3.52797	Deleterious				11.5352	3.52797	Deleterious
48	p.Pro48Gln	14.932	3.90033	Deleterious				14.932	3.90033	Deleterious
48	p.Pro48Pro	1	0	Neutral				1	0	Neutral
48	p.Pro48Leu	17.5018	4.12943	Deleterious				17.5018	4.12943	Deleterious
48	p.Pro48Asp	17.9073	4.16247	Deleterious				17.9073	4.16247	Deleterious
48	p.Pro48Glu	16.6323	4.05592	Deleterious				16.6323	4.05592	Deleterious
48	p.Pro48Ala	0.748645	-0.417646	Neutral				0.748645	-0.417646	Neutral
48	p.Pro48Gly	2.07537	1.05337	Indeterminate				2.07537	1.05337	Indeterminate
48	p.Pro48Val	2.16298	1.11302	Deleterious				2.16298	1.11302	Deleterious
48	p.Pro48Tyr	18.1335	4.18058	Deleterious				18.1335	4.18058	Deleterious
48	p.Pro48Cys	2.3727	1.24653	Deleterious				2.3727	1.24653	Deleterious
48	p.Pro48Trp	17.9618	4.16686	Deleterious				17.9618	4.16686	Deleterious
48	p.Pro48Phe	15.0572	3.91238	Deleterious				15.0572	3.91238	Deleterious
49	p.Ile49Asn	6.56257	2.71426	Deleterious				6.56257	2.71426	Deleterious
49	p.Ile49Lys	8.49014	3.08579	Deleterious				8.49014	3.08579	Deleterious
49	p.Ile49Thr	2.31844	1.21316	Deleterious				2.31844	1.21316	Deleterious
49	p.Ile49Arg	7.5368	2.91395	Deleterious				7.5368	2.91395	Deleterious
49	p.Ile49Ser	4.51432	2.17451	Deleterious				4.51432	2.17451	Deleterious
49	p.Ile49Ile	1	0	Neutral				1	0	Neutral
49	p.Ile49Met	1.08726	0.120695	Neutral				1.08726	0.120695	Neutral
49	p.Ile49His	4.93034	2.30169	Deleterious				4.93034	2.30169	Deleterious
49	p.Ile49Gln	3.97764	1.99191	Deleterious				3.97764	1.99191	Deleterious
49	p.Ile49Pro	7.17814	2.84361	Deleterious				7.17814	2.84361	Deleterious
49	p.Ile49Leu	0.965452	-0.050723	Neutral				0.965452	-0.050723	Neutral
49	p.Ile49Asp	9.18155	3.19874	Deleterious				9.18155	3.19874	Deleterious
49	p.Ile49Glu	8.39934	3.07028	Deleterious				8.39934	3.07028	Deleterious
49	p.Ile49Ala	2.27449	1.18554	Deleterious				2.27449	1.18554	Deleterious
49	p.Ile49Gly	8.88387	3.15119	Deleterious				8.88387	3.15119	Deleterious
49	p.Ile49Val	1.09043	0.124899	Neutral				1.09043	0.124899	Neutral
49	p.Ile49Tyr	6.77383	2.75997	Deleterious				6.77383	2.75997	Deleterious
49	p.Ile49Cys	1.85368	0.890394	Indeterminate				1.85368	0.890394	Indeterminate
49	p.Ile49Trp	7.81517	2.96628	Deleterious				7.81517	2.96628	Deleterious
49	p.Ile49Phe	2.33182	1.22146	Deleterious				2.33182	1.22146	Deleterious
50	p.Gln50Asn	1.3276	0.408825	Indeterminate				1.3276	0.408825	Indeterminate
50	p.Gln50Lys	12.7403	3.67133	Deleterious				12.7403	3.67133	Deleterious
50	p.Gln50Thr	1.25858	0.331794	Indeterminate				1.25858	0.331794	Indeterminate
50	p.Gln50Arg	17.0124	4.08852	Deleterious				17.0124	4.08852	Deleterious
50	p.Gln50Ser	1.18225	0.241536	Indeterminate				1.18225	0.241536	Indeterminate
50	p.Gln50Ile	4.64897	2.21691	Deleterious				4.64897	2.21691	Deleterious
50	p.Gln50Met	1.03606	0.0511144	Neutral				1.03606	0.0511144	Neutral
50	p.Gln50His	4.30663	2.10656	Deleterious				4.30663	2.10656	Deleterious
50	p.Gln50Gln	1	0	Neutral				1	0	Neutral
50	p.Gln50Pro	18.0889	4.17703	Deleterious				18.0889	4.17703	Deleterious
50	p.Gln50Leu	1.87052	0.903439	Indeterminate				1.87052	0.903439	Indeterminate
50	p.Gln50Asp	6.89193	2.78491	Deleterious				6.89193	2.78491	Deleterious
50	p.Gln50Glu	1.05385	0.0756732	Neutral				1.05385	0.0756732	Neutral
50	p.Gln50Ala	1.36488	0.448775	Indeterminate				1.36488	0.448775	Indeterminate
50	p.Gln50Gly	1.469	0.554831	Indeterminate				1.469	0.554831	Indeterminate
50	p.Gln50Val	3.94676	1.98067	Deleterious				3.94676	1.98067	Deleterious
50	p.Gln50Tyr	16.8943	4.07846	Deleterious				16.8943	4.07846	Deleterious
50	p.Gln50Cys	1.85093	0.888249	Indeterminate				1.85093	0.888249	Indeterminate
50	p.Gln50Trp	14.9116	3.89836	Deleterious				14.9116	3.89836	Deleterious
50	p.Gln50Phe	13.9425	3.80142	Deleterious				13.9425	3.80142	Deleterious
51	p.Val51Asn	2.31838	1.21312	Deleterious				2.31838	1.21312	Deleterious
51	p.Val51Lys	33.6651	5.07318	Deleterious				33.6651	5.07318	Deleterious
51	p.Val51Thr	0.945703	-0.0805415	Neutral				0.945703	-0.0805415	Neutral
51	p.Val51Arg	35.6311	5.15506	Deleterious				35.6311	5.15506	Deleterious
51	p.Val51Ser	0.745563	-0.423598	Neutral				0.745563	-0.423598	Neutral
51	p.Val51Ile	1.27599	0.351622	Indeterminate				1.27599	0.351622	Indeterminate
51	p.Val51Met	2.47664	1.30838	Deleterious				2.47664	1.30838	Deleterious
51	p.Val51His	19.5096	4.28611	Deleterious				19.5096	4.28611	Deleterious
51	p.Val51Gln	3.54993	1.82779	Deleterious				3.54993	1.82779	Deleterious
51	p.Val51Pro	22.4246	4.48701	Deleterious				22.4246	4.48701	Deleterious
51	p.Val51Leu	1.06841	0.095469	Neutral				1.06841	0.095469	Neutral
51	p.Val51Asp	20.6759	4.36988	Deleterious				20.6759	4.36988	Deleterious
51	p.Val51Glu	23.5079	4.55508	Deleterious				23.5079	4.55508	Deleterious
51	p.Val51Ala	0.566525	-0.819789	Neutral				0.566525	-0.819789	Neutral
51	p.Val51Gly	0.9966	-0.00491297	Neutral				0.9966	-0.00491297	Neutral
51	p.Val51Val	1	0	Neutral				1	0	Neutral
51	p.Val51Tyr	11.3881	3.50945	Deleterious				11.3881	3.50945	Deleterious
51	p.Val51Cys	0.947755	-0.0774135	Neutral				0.947755	-0.0774135	Neutral
51	p.Val51Trp	24.1833	4.59594	Deleterious				24.1833	4.59594	Deleterious
51	p.Val51Phe	8.55145	3.09617	Deleterious				8.55145	3.09617	Deleterious
52	p.Met52Asn	1.75205	0.809046	Indeterminate				1.75205	0.809046	Indeterminate
52	p.Met52Lys	2.56481	1.35885	Deleterious				2.56481	1.35885	Deleterious
52	p.Met52Thr	1.15678	0.210112	Neutral				1.15678	0.210112	Neutral
52	p.Met52Arg	2.65525	1.40885	Deleterious				2.65525	1.40885	Deleterious
52	p.Met52Ser	1.02748	0.0391103	Neutral				1.02748	0.0391103	Neutral
52	p.Met52Ile	1.42265	0.508576	Indeterminate				1.42265	0.508576	Indeterminate
52	p.Met52Met	1	0	Neutral				1	0	Neutral
52	p.Met52His	1.53774	0.62081	Indeterminate				1.53774	0.62081	Indeterminate
52	p.Met52Gln	1.22438	0.292046	Indeterminate				1.22438	0.292046	Indeterminate
52	p.Met52Pro	2.21683	1.1485	Deleterious				2.21683	1.1485	Deleterious
52	p.Met52Leu	1.05382	0.0756232	Neutral				1.05382	0.0756232	Neutral
52	p.Met52Asp	2.54025	1.34497	Deleterious				2.54025	1.34497	Deleterious
52	p.Met52Glu	2.04486	1.032	Indeterminate				2.04486	1.032	Indeterminate
52	p.Met52Ala	1.02541	0.0362073	Neutral				1.02541	0.0362073	Neutral
52	p.Met52Gly	0.977049	-0.0334971	Neutral				0.977049	-0.0334971	Neutral
52	p.Met52Val	0.979738	-0.0295323	Neutral				0.979738	-0.0295323	Neutral
52	p.Met52Tyr	1.50316	0.587997	Indeterminate				1.50316	0.587997	Indeterminate
52	p.Met52Cys	0.959742	-0.0592821	Neutral				0.959742	-0.0592821	Neutral
52	p.Met52Trp	1.98155	0.986628	Indeterminate				1.98155	0.986628	Indeterminate
52	p.Met52Phe	1.29101	0.368502	Indeterminate				1.29101	0.368502	Indeterminate
53	p.Met53Asn	2.84551	1.50869	Deleterious				2.84551	1.50869	Deleterious
53	p.Met53Lys	1.89493	0.922144	Indeterminate				1.89493	0.922144	Indeterminate
53	p.Met53Thr	3.30666	1.72538	Deleterious				3.30666	1.72538	Deleterious
53	p.Met53Arg	1.42553	0.511495	Indeterminate				1.42553	0.511495	Indeterminate
53	p.Met53Ser	1.6774	0.746229	Indeterminate				1.6774	0.746229	Indeterminate
53	p.Met53Ile	6.83443	2.77282	Deleterious				6.83443	2.77282	Deleterious
53	p.Met53Met	1	0	Neutral				1	0	Neutral
53	p.Met53His	3.27643	1.71213	Deleterious				3.27643	1.71213	Deleterious
53	p.Met53Gln	1.44685	0.532918	Indeterminate				1.44685	0.532918	Indeterminate
53	p.Met53Pro	9.70551	3.2788	Deleterious				9.70551	3.2788	Deleterious
53	p.Met53Leu	1.80974	0.855784	Indeterminate				1.80974	0.855784	Indeterminate
53	p.Met53Asp	13.9326	3.8004	Deleterious				13.9326	3.8004	Deleterious
53	p.Met53Glu	4.03393	2.01219	Deleterious				4.03393	2.01219	Deleterious
53	p.Met53Ala	1.57717	0.657335	Indeterminate				1.57717	0.657335	Indeterminate
53	p.Met53Gly	6.11078	2.61136	Deleterious				6.11078	2.61136	Deleterious
53	p.Met53Val	7.64391	2.93431	Deleterious				7.64391	2.93431	Deleterious
53	p.Met53Tyr	6.71246	2.74684	Deleterious				6.71246	2.74684	Deleterious
53	p.Met53Cys	1.81935	0.86342	Indeterminate				1.81935	0.86342	Indeterminate
53	p.Met53Trp	11.3391	3.50323	Deleterious				11.3391	3.50323	Deleterious
53	p.Met53Phe	5.91946	2.56547	Deleterious				5.91946	2.56547	Deleterious
54	p.Met54Asn	1.34262	0.425048	Indeterminate				1.34262	0.425048	Indeterminate
54	p.Met54Lys	1.8735	0.905738	Indeterminate				1.8735	0.905738	Indeterminate
54	p.Met54Thr	0.964644	-0.0519311	Neutral				0.964644	-0.0519311	Neutral
54	p.Met54Arg	2.34644	1.23047	Deleterious				2.34644	1.23047	Deleterious
54	p.Met54Ser	1.12339	0.167864	Neutral				1.12339	0.167864	Neutral
54	p.Met54Ile	1.18387	0.243506	Indeterminate				1.18387	0.243506	Indeterminate
54	p.Met54Met	1	0	Neutral				1	0	Neutral
54	p.Met54His	1.25646	0.329362	Indeterminate				1.25646	0.329362	Indeterminate
54	p.Met54Gln	1.66461	0.73518	Indeterminate				1.66461	0.73518	Indeterminate
54	p.Met54Pro	2.74697	1.45784	Deleterious				2.74697	1.45784	Deleterious
54	p.Met54Leu	1.09497	0.130897	Neutral				1.09497	0.130897	Neutral
54	p.Met54Asp	2.34902	1.23206	Deleterious				2.34902	1.23206	Deleterious
54	p.Met54Glu	2.0931	1.06564	Indeterminate				2.0931	1.06564	Indeterminate
54	p.Met54Ala	1.01497	0.0214394	Neutral				1.01497	0.0214394	Neutral
54	p.Met54Gly	1.03203	0.0454904	Neutral				1.03203	0.0454904	Neutral
54	p.Met54Val	1.0512	0.0720351	Neutral				1.0512	0.0720351	Neutral
54	p.Met54Tyr	1.03991	0.0564618	Neutral				1.03991	0.0564618	Neutral
54	p.Met54Cys	0.904019	-0.145575	Neutral				0.904019	-0.145575	Neutral
54	p.Met54Trp	1.22187	0.289092	Indeterminate				1.22187	0.289092	Indeterminate
54	p.Met54Phe	1.11111	0.152008	Neutral				1.11111	0.152008	Neutral
55	p.Gly55Asn	12.628	3.65856	Deleterious				12.628	3.65856	Deleterious
55	p.Gly55Lys	12.0383	3.58956	Deleterious				12.0383	3.58956	Deleterious
55	p.Gly55Thr	9.96377	3.31669	Deleterious				9.96377	3.31669	Deleterious
55	p.Gly55Arg	11.9697	3.58131	Deleterious				11.9697	3.58131	Deleterious
55	p.Gly55Ser	2.67978	1.42211	Deleterious				2.67978	1.42211	Deleterious
55	p.Gly55Ile	11.7781	3.55803	Deleterious				11.7781	3.55803	Deleterious
55	p.Gly55Met	14.0733	3.81489	Deleterious				14.0733	3.81489	Deleterious
55	p.Gly55His	15.6753	3.97042	Deleterious				15.6753	3.97042	Deleterious
55	p.Gly55Gln	13.1617	3.71827	Deleterious				13.1617	3.71827	Deleterious
55	p.Gly55Pro	20.4944	4.35716	Deleterious				20.4944	4.35716	Deleterious
55	p.Gly55Leu	17.123	4.09786	Deleterious				17.123	4.09786	Deleterious
55	p.Gly55Asp	16.4857	4.04314	Deleterious				16.4857	4.04314	Deleterious
55	p.Gly55Glu	13.0662	3.70777	Deleterious				13.0662	3.70777	Deleterious
55	p.Gly55Ala	1.61927	0.695344	Indeterminate				1.61927	0.695344	Indeterminate
55	p.Gly55Gly	1	0	Neutral				1	0	Neutral
55	p.Gly55Val	14.0883	3.81643	Deleterious				14.0883	3.81643	Deleterious
55	p.Gly55Tyr	10.8452	3.43899	Deleterious				10.8452	3.43899	Deleterious
55	p.Gly55Cys	3.75402	1.90844	Deleterious				3.75402	1.90844	Deleterious
55	p.Gly55Trp	14.8059	3.8881	Deleterious				14.8059	3.8881	Deleterious
55	p.Gly55Phe	11.4736	3.52024	Deleterious				11.4736	3.52024	Deleterious
56	p.Ser56Asn	0.303537	-1.72005	Neutral				0.303537	-1.72005	Neutral
56	p.Ser56Lys	0.818216	-0.289447	Neutral				0.818216	-0.289447	Neutral
56	p.Ser56Thr	0.791246	-0.337802	Neutral				0.791246	-0.337802	Neutral
56	p.Ser56Arg	0.37652	-1.4092	Neutral				0.37652	-1.4092	Neutral
56	p.Ser56Ser	1	0	Neutral				1	0	Neutral
56	p.Ser56Ile	6.44638	2.68849	Deleterious				6.44638	2.68849	Deleterious
56	p.Ser56Met	0.415942	-1.26555	Neutral				0.415942	-1.26555	Neutral
56	p.Ser56His	0.426331	-1.22995	Neutral				0.426331	-1.22995	Neutral
56	p.Ser56Gln	0.571835	-0.806328	Neutral				0.571835	-0.806328	Neutral
56	p.Ser56Pro	12.135	3.60111	Deleterious				12.135	3.60111	Deleterious
56	p.Ser56Leu	1.87239	0.904878	Indeterminate				1.87239	0.904878	Indeterminate
56	p.Ser56Asp	0.790497	-0.339168	Neutral				0.790497	-0.339168	Neutral
56	p.Ser56Glu	1.1989	0.261707	Indeterminate				1.1989	0.261707	Indeterminate
56	p.Ser56Ala	0.768559	-0.379772	Neutral				0.768559	-0.379772	Neutral
56	p.Ser56Gly	1.17908	0.237656	Neutral				1.17908	0.237656	Neutral
56	p.Ser56Val	1.16097	0.215327	Neutral				1.16097	0.215327	Neutral
56	p.Ser56Tyr	0.503388	-0.990256	Neutral				0.503388	-0.990256	Neutral
56	p.Ser56Cys	0.429201	-1.22027	Neutral				0.429201	-1.22027	Neutral
56	p.Ser56Trp	4.64607	2.21601	Deleterious				4.64607	2.21601	Deleterious
56	p.Ser56Phe	0.722473	-0.468984	Neutral				0.722473	-0.468984	Neutral
57	p.Ala57Asn	0.474098	-1.07674	Neutral	1.14388	0.19394	Neutral	0.808991	-0.305805	Neutral
57	p.Ala57Lys	0.429552	-1.2191	Neutral	1.30454	0.383545	Indeterminate	0.867048	-0.205817	Neutral
57	p.Ala57Thr	0.564268	-0.825548	Neutral	1.30831	0.38771	Indeterminate	0.936291	-0.0949707	Neutral
57	p.Ala57Arg	0.488981	-1.03215	Neutral	1.03824	0.0541435	Neutral	0.763612	-0.389089	Neutral
57	p.Ala57Ser	0.580153	-0.785494	Neutral	1.57533	0.655658	Indeterminate	1.07774	0.108014	Neutral
57	p.Ala57Ile	0.71117	-0.491733	Neutral	1.1698	0.226258	Neutral	0.940483	-0.0885256	Neutral
57	p.Ala57Met	0.446586	-1.16299	Neutral	1.25661	0.329534	Indeterminate	0.851597	-0.231758	Neutral
57	p.Ala57His	0.559779	-0.837071	Neutral	0.900815	-0.150698	Neutral	0.730297	-0.453445	Neutral
57	p.Ala57Gln	0.540462	-0.887736	Neutral	1.26911	0.34382	Indeterminate	0.904787	-0.14435	Neutral
57	p.Ala57Pro	0.615171	-0.70094	Neutral	1.49397	0.579149	Indeterminate	1.05457	0.0766541	Neutral
57	p.Ala57Leu	0.443482	-1.17305	Neutral	1.62131	0.697161	Indeterminate	1.0324	0.0459977	Neutral
57	p.Ala57Asp	0.768353	-0.380158	Neutral	1.04659	0.0656947	Neutral	0.907471	-0.140077	Neutral
57	p.Ala57Glu	0.563773	-0.826812	Neutral	1.84241	0.88159	Indeterminate	1.20309	0.266744	Indeterminate
57	p.Ala57Ala	1	0	Neutral	1	0	Neutral	1	0	Neutral
57	p.Ala57Gly	0.498919	-1.00312	Neutral	1.2711	0.346079	Indeterminate	0.88501	-0.176234	Neutral
57	p.Ala57Val	0.530583	-0.914349	Neutral	1.10435	0.143192	Neutral	0.817464	-0.290772	Neutral
57	p.Ala57Tyr	0.523561	-0.933572	Neutral	1.85527	0.891627	Indeterminate	1.18941	0.250251	Indeterminate
57	p.Ala57Cys	0.379016	-1.39967	Neutral	1.52905	0.612634	Indeterminate	0.954032	-0.0678907	Neutral
57	p.Ala57Trp	0.457858	-1.12703	Neutral	1.54237	0.625149	Indeterminate	1.00011	0.000164707	Neutral
57	p.Ala57Phe	0.326127	-1.6165	Neutral	1.69292	0.759516	Indeterminate	1.00952	0.0136759	Neutral
58	p.Arg58Asn	0.750555	-0.413971	Neutral				0.750555	-0.413971	Neutral
58	p.Arg58Lys	0.712191	-0.489665	Neutral				0.712191	-0.489665	Neutral
58	p.Arg58Thr	0.809163	-0.305497	Neutral				0.809163	-0.305497	Neutral
58	p.Arg58Arg	1	0	Neutral				1	0	Neutral
58	p.Arg58Ser	0.759701	-0.396497	Neutral				0.759701	-0.396497	Neutral
58	p.Arg58Ile	0.808633	-0.306442	Neutral				0.808633	-0.306442	Neutral
58	p.Arg58Met	0.705108	-0.504083	Neutral				0.705108	-0.504083	Neutral
58	p.Arg58His	0.639078	-0.645935	Neutral				0.639078	-0.645935	Neutral
58	p.Arg58Gln	0.931131	-0.102944	Neutral				0.931131	-0.102944	Neutral
58	p.Arg58Pro	1.07921	0.109974	Neutral				1.07921	0.109974	Neutral
58	p.Arg58Leu	0.825545	-0.276582	Neutral				0.825545	-0.276582	Neutral
58	p.Arg58Asp	0.718296	-0.47735	Neutral				0.718296	-0.47735	Neutral
58	p.Arg58Glu	0.833687	-0.262423	Neutral				0.833687	-0.262423	Neutral
58	p.Arg58Ala	0.884383	-0.177256	Neutral				0.884383	-0.177256	Neutral
58	p.Arg58Gly	0.92585	-0.111149	Neutral				0.92585	-0.111149	Neutral
58	p.Arg58Val	0.897671	-0.155742	Neutral				0.897671	-0.155742	Neutral
58	p.Arg58Tyr	0.619145	-0.691652	Neutral				0.619145	-0.691652	Neutral
58	p.Arg58Cys	0.708083	-0.49801	Neutral				0.708083	-0.49801	Neutral
58	p.Arg58Trp	0.758852	-0.39811	Neutral				0.758852	-0.39811	Neutral
58	p.Arg58Phe	0.896896	-0.156987	Neutral				0.896896	-0.156987	Neutral
59	p.Val59Asn	3.18979	1.67346	Deleterious				3.18979	1.67346	Deleterious
59	p.Val59Lys	12.8769	3.68671	Deleterious				12.8769	3.68671	Deleterious
59	p.Val59Thr	0.856398	-0.223646	Neutral				0.856398	-0.223646	Neutral
59	p.Val59Arg	19.1461	4.25898	Deleterious				19.1461	4.25898	Deleterious
59	p.Val59Ser	1.24862	0.320331	Indeterminate				1.24862	0.320331	Indeterminate
59	p.Val59Ile	0.739142	-0.436076	Neutral				0.739142	-0.436076	Neutral
59	p.Val59Met	1.00797	0.0114465	Neutral				1.00797	0.0114465	Neutral
59	p.Val59His	16.5791	4.0513	Deleterious				16.5791	4.0513	Deleterious
59	p.Val59Gln	3.62215	1.85684	Deleterious				3.62215	1.85684	Deleterious
59	p.Val59Pro	12.689	3.6655	Deleterious				12.689	3.6655	Deleterious
59	p.Val59Leu	1.30682	0.38606	Indeterminate				1.30682	0.38606	Indeterminate
59	p.Val59Asp	20.8763	4.38379	Deleterious				20.8763	4.38379	Deleterious
59	p.Val59Glu	11.9753	3.58199	Deleterious				11.9753	3.58199	Deleterious
59	p.Val59Ala	1.17149	0.228349	Neutral				1.17149	0.228349	Neutral
59	p.Val59Gly	2.17868	1.12346	Deleterious				2.17868	1.12346	Deleterious
59	p.Val59Val	1	0	Neutral				1	0	Neutral
59	p.Val59Tyr	18.7715	4.23047	Deleterious				18.7715	4.23047	Deleterious
59	p.Val59Cys	0.943722	-0.0835658	Neutral				0.943722	-0.0835658	Neutral
59	p.Val59Trp	21.3191	4.41408	Deleterious				21.3191	4.41408	Deleterious
59	p.Val59Phe	17.5987	4.1374	Deleterious				17.5987	4.1374	Deleterious
60	p.Ala60Asn	2.67066	1.41719	Deleterious				2.67066	1.41719	Deleterious
60	p.Ala60Lys	3.22623	1.68985	Deleterious				3.22623	1.68985	Deleterious
60	p.Ala60Thr	1.07649	0.10633	Neutral				1.07649	0.10633	Neutral
60	p.Ala60Arg	4.98137	2.31654	Deleterious				4.98137	2.31654	Deleterious
60	p.Ala60Ser	1.7858	0.836571	Indeterminate				1.7858	0.836571	Indeterminate
60	p.Ala60Ile	1.98884	0.991928	Indeterminate				1.98884	0.991928	Indeterminate
60	p.Ala60Met	1.22616	0.294146	Indeterminate				1.22616	0.294146	Indeterminate
60	p.Ala60His	2.62085	1.39003	Deleterious				2.62085	1.39003	Deleterious
60	p.Ala60Gln	3.173	1.66585	Deleterious				3.173	1.66585	Deleterious
60	p.Ala60Pro	1.71214	0.775802	Indeterminate				1.71214	0.775802	Indeterminate
60	p.Ala60Leu	1.06074	0.0850673	Neutral				1.06074	0.0850673	Neutral
60	p.Ala60Asp	2.67955	1.42199	Deleterious				2.67955	1.42199	Deleterious
60	p.Ala60Glu	2.831	1.50131	Deleterious				2.831	1.50131	Deleterious
60	p.Ala60Ala	1	0	Neutral				1	0	Neutral
60	p.Ala60Gly	1.04619	0.0651438	Neutral				1.04619	0.0651438	Neutral
60	p.Ala60Val	1.23692	0.306748	Indeterminate				1.23692	0.306748	Indeterminate
60	p.Ala60Tyr	2.81739	1.49436	Deleterious				2.81739	1.49436	Deleterious
60	p.Ala60Cys	1.32193	0.402646	Indeterminate				1.32193	0.402646	Indeterminate
60	p.Ala60Trp	3.2125	1.6837	Deleterious				3.2125	1.6837	Deleterious
60	p.Ala60Phe	3.38357	1.75854	Deleterious				3.38357	1.75854	Deleterious
61	p.Glu61Asn	0.990197	-0.014213	Neutral				0.990197	-0.014213	Neutral
61	p.Glu61Lys	0.784966	-0.349298	Neutral				0.784966	-0.349298	Neutral
61	p.Glu61Thr	0.879702	-0.184914	Neutral				0.879702	-0.184914	Neutral
61	p.Glu61Arg	1.22943	0.297985	Indeterminate				1.22943	0.297985	Indeterminate
61	p.Glu61Ser	1.06331	0.0885631	Neutral				1.06331	0.0885631	Neutral
61	p.Glu61Ile	1.09985	0.137307	Neutral				1.09985	0.137307	Neutral
61	p.Glu61Met	1.14773	0.198785	Neutral				1.14773	0.198785	Neutral
61	p.Glu61His	1.03671	0.0520176	Neutral				1.03671	0.0520176	Neutral
61	p.Glu61Gln	0.836831	-0.256992	Neutral				0.836831	-0.256992	Neutral
61	p.Glu61Pro	6.09417	2.60743	Deleterious				6.09417	2.60743	Deleterious
61	p.Glu61Leu	0.917227	-0.12465	Neutral				0.917227	-0.12465	Neutral
61	p.Glu61Asp	0.936557	-0.0945615	Neutral				0.936557	-0.0945615	Neutral
61	p.Glu61Glu	1	0	Neutral				1	0	Neutral
61	p.Glu61Ala	0.911063	-0.134377	Neutral				0.911063	-0.134377	Neutral
61	p.Glu61Gly	0.828818	-0.270873	Neutral				0.828818	-0.270873	Neutral
61	p.Glu61Val	0.874392	-0.193648	Neutral				0.874392	-0.193648	Neutral
61	p.Glu61Tyr	1.21382	0.279552	Indeterminate				1.21382	0.279552	Indeterminate
61	p.Glu61Cys	0.90791	-0.139378	Neutral				0.90791	-0.139378	Neutral
61	p.Glu61Trp	1.03855	0.0545751	Neutral				1.03855	0.0545751	Neutral
61	p.Glu61Phe	0.970143	-0.0437302	Neutral				0.970143	-0.0437302	Neutral
62	p.Leu62Asn	0.669413	-0.579031	Neutral	0.802508	-0.317412	Neutral	0.735961	-0.4423	Neutral
62	p.Leu62Lys	1.32547	0.406505	Indeterminate	0.816735	-0.292061	Neutral	1.0711	0.0990969	Neutral
62	p.Leu62Thr	1.04435	0.0625995	Neutral	0.789626	-0.340758	Neutral	0.916986	-0.125028	Neutral
62	p.Leu62Arg	2.26687	1.1807	Deleterious	0.529471	-0.917377	Neutral	1.39817	0.48354	Indeterminate
62	p.Leu62Ser	0.856682	-0.223169	Neutral	0.755512	-0.404474	Neutral	0.806097	-0.310975	Neutral
62	p.Leu62Ile	1.08641	0.119566	Neutral	0.453925	-1.13947	Neutral	0.770167	-0.376758	Neutral
62	p.Leu62Met	0.83514	-0.25991	Neutral	0.526099	-0.926595	Neutral	0.680619	-0.55508	Neutral
62	p.Leu62His	0.704302	-0.505735	Neutral	0.892729	-0.163706	Neutral	0.798515	-0.324608	Neutral
62	p.Leu62Gln	3.81415	1.93136	Deleterious	1.38335	0.468171	Indeterminate	2.59875	1.37782	Deleterious
62	p.Leu62Pro	0.433951	-1.2044	Neutral	0.245241	-2.02773	Neutral	0.339596	-1.55811	Neutral
62	p.Leu62Leu	1	0	Neutral	1	0	Neutral	1	0	Neutral
62	p.Leu62Asp	1.04883	0.0687804	Neutral	1.0923	0.127367	Neutral	1.07056	0.0983712	Neutral
62	p.Leu62Glu	1.15816	0.21183	Neutral	0.438442	-1.18954	Neutral	0.7983	-0.324998	Neutral
62	p.Leu62Ala	0.937303	-0.0934131	Neutral	0.4746	-1.07521	Neutral	0.705952	-0.502359	Neutral
62	p.Leu62Gly	1.4382	0.524267	Indeterminate	1.1689	0.225146	Neutral	1.30355	0.382445	Indeterminate
62	p.Leu62Val	1.10111	0.138956	Neutral	0.575946	-0.795995	Neutral	0.838527	-0.254071	Neutral
62	p.Leu62Tyr	1.76203	0.817242	Indeterminate	0.955959	-0.0649787	Neutral	1.359	0.442542	Indeterminate
62	p.Leu62Cys	0.908638	-0.138223	Neutral	0.829796	-0.269171	Neutral	0.869217	-0.202212	Neutral
62	p.Leu62Trp	0.843009	-0.246381	Neutral	0.894505	-0.160839	Neutral	0.868757	-0.202976	Neutral
62	p.Leu62Phe	0.643201	-0.636658	Neutral	0.713124	-0.487775	Neutral	0.678163	-0.560297	Neutral
63	p.Leu63Asn	13.2875	3.73199	Deleterious				13.2875	3.73199	Deleterious
63	p.Leu63Lys	23.2448	4.53883	Deleterious				23.2448	4.53883	Deleterious
63	p.Leu63Thr	12.6152	3.65709	Deleterious				12.6152	3.65709	Deleterious
63	p.Leu63Arg	17.3212	4.11447	Deleterious				17.3212	4.11447	Deleterious
63	p.Leu63Ser	15.916	3.99241	Deleterious				15.916	3.99241	Deleterious
63	p.Leu63Ile	1.40756	0.493197	Indeterminate				1.40756	0.493197	Indeterminate
63	p.Leu63Met	0.852176	-0.230777	Neutral				0.852176	-0.230777	Neutral
63	p.Leu63His	16.943	4.08261	Deleterious				16.943	4.08261	Deleterious
63	p.Leu63Gln	19.3271	4.27255	Deleterious				19.3271	4.27255	Deleterious
63	p.Leu63Pro	20.6359	4.36708	Deleterious				20.6359	4.36708	Deleterious
63	p.Leu63Leu	1	0	Neutral				1	0	Neutral
63	p.Leu63Asp	31.9242	4.99658	Deleterious				31.9242	4.99658	Deleterious
63	p.Leu63Glu	14.8126	3.88875	Deleterious				14.8126	3.88875	Deleterious
63	p.Leu63Ala	15.7599	3.97818	Deleterious				15.7599	3.97818	Deleterious
63	p.Leu63Gly	19.8445	4.31066	Deleterious				19.8445	4.31066	Deleterious
63	p.Leu63Val	3.30824	1.72606	Deleterious				3.30824	1.72606	Deleterious
63	p.Leu63Tyr	16.2444	4.02187	Deleterious				16.2444	4.02187	Deleterious
63	p.Leu63Cys	3.29609	1.72075	Deleterious				3.29609	1.72075	Deleterious
63	p.Leu63Trp	16.99	4.08661	Deleterious				16.99	4.08661	Deleterious
63	p.Leu63Phe	2.23473	1.1601	Deleterious				2.23473	1.1601	Deleterious
64	p.Leu64Asn	1.50636	0.59107	Indeterminate				1.50636	0.59107	Indeterminate
64	p.Leu64Lys	1.14532	0.195748	Neutral				1.14532	0.195748	Neutral
64	p.Leu64Thr	0.907884	-0.139421	Neutral				0.907884	-0.139421	Neutral
64	p.Leu64Arg	1.2508	0.322851	Indeterminate				1.2508	0.322851	Indeterminate
64	p.Leu64Ser	0.894913	-0.160181	Neutral				0.894913	-0.160181	Neutral
64	p.Leu64Ile	1.16676	0.222508	Neutral				1.16676	0.222508	Neutral
64	p.Leu64Met	0.96634	-0.0493979	Neutral				0.96634	-0.0493979	Neutral
64	p.Leu64His	1.25067	0.322702	Indeterminate				1.25067	0.322702	Indeterminate
64	p.Leu64Gln	1.34286	0.425308	Indeterminate				1.34286	0.425308	Indeterminate
64	p.Leu64Pro	3.96291	1.98656	Deleterious				3.96291	1.98656	Deleterious
64	p.Leu64Leu	1	0	Neutral				1	0	Neutral
64	p.Leu64Asp	1.8023	0.849843	Indeterminate				1.8023	0.849843	Indeterminate
64	p.Leu64Glu	1.40989	0.49558	Indeterminate				1.40989	0.49558	Indeterminate
64	p.Leu64Ala	1.13824	0.18681	Neutral				1.13824	0.18681	Neutral
64	p.Leu64Gly	1.37096	0.455181	Indeterminate				1.37096	0.455181	Indeterminate
64	p.Leu64Val	0.811325	-0.301647	Neutral				0.811325	-0.301647	Neutral
64	p.Leu64Tyr	1.01092	0.0156699	Neutral				1.01092	0.0156699	Neutral
64	p.Leu64Cys	0.968843	-0.0456651	Neutral				0.968843	-0.0456651	Neutral
64	p.Leu64Trp	1.08698	0.120323	Neutral				1.08698	0.120323	Neutral
64	p.Leu64Phe	0.828373	-0.271648	Neutral				0.828373	-0.271648	Neutral
65	p.Leu65Asn	1.41311	0.498871	Indeterminate				1.41311	0.498871	Indeterminate
65	p.Leu65Lys	0.822383	-0.282117	Neutral				0.822383	-0.282117	Neutral
65	p.Leu65Thr	1.17623	0.234168	Neutral				1.17623	0.234168	Neutral
65	p.Leu65Arg	0.95118	-0.0722095	Neutral				0.95118	-0.0722095	Neutral
65	p.Leu65Ser	1.21871	0.285354	Indeterminate				1.21871	0.285354	Indeterminate
65	p.Leu65Ile	0.971803	-0.0412643	Neutral				0.971803	-0.0412643	Neutral
65	p.Leu65Met	0.812482	-0.299592	Neutral				0.812482	-0.299592	Neutral
65	p.Leu65His	1.29689	0.375057	Indeterminate				1.29689	0.375057	Indeterminate
65	p.Leu65Gln	1.2587	0.331936	Indeterminate				1.2587	0.331936	Indeterminate
65	p.Leu65Pro	11.2793	3.49561	Deleterious				11.2793	3.49561	Deleterious
65	p.Leu65Leu	1	0	Neutral				1	0	Neutral
65	p.Leu65Asp	0.960872	-0.0575845	Neutral				0.960872	-0.0575845	Neutral
65	p.Leu65Glu	0.9048	-0.144328	Neutral				0.9048	-0.144328	Neutral
65	p.Leu65Ala	1.17507	0.232746	Neutral				1.17507	0.232746	Neutral
65	p.Leu65Gly	1.48518	0.570636	Indeterminate				1.48518	0.570636	Indeterminate
65	p.Leu65Val	1.11274	0.154119	Neutral				1.11274	0.154119	Neutral
65	p.Leu65Tyr	0.993997	-0.00868712	Neutral				0.993997	-0.00868712	Neutral
65	p.Leu65Cys	1.56734	0.648315	Indeterminate				1.56734	0.648315	Indeterminate
65	p.Leu65Trp	1.3996	0.485019	Indeterminate				1.3996	0.485019	Indeterminate
65	p.Leu65Phe	0.966687	-0.0488792	Neutral				0.966687	-0.0488792	Neutral
66	p.His66Asn	0.866703	-0.206391	Neutral				0.866703	-0.206391	Neutral
66	p.His66Lys	0.893247	-0.16287	Neutral				0.893247	-0.16287	Neutral
66	p.His66Thr	1.15247	0.204734	Neutral				1.15247	0.204734	Neutral
66	p.His66Arg	1.21107	0.27628	Indeterminate				1.21107	0.27628	Indeterminate
66	p.His66Ser	1.03371	0.0478367	Neutral				1.03371	0.0478367	Neutral
66	p.His66Ile	1.56985	0.650627	Indeterminate				1.56985	0.650627	Indeterminate
66	p.His66Met	0.908088	-0.139096	Neutral				0.908088	-0.139096	Neutral
66	p.His66His	1	0	Neutral				1	0	Neutral
66	p.His66Gln	1.13902	0.187792	Neutral				1.13902	0.187792	Neutral
66	p.His66Pro	18.0247	4.17191	Deleterious				18.0247	4.17191	Deleterious
66	p.His66Leu	1.18107	0.240093	Indeterminate				1.18107	0.240093	Indeterminate
66	p.His66Asp	0.957239	-0.0630492	Neutral				0.957239	-0.0630492	Neutral
66	p.His66Glu	1.34195	0.424331	Indeterminate				1.34195	0.424331	Indeterminate
66	p.His66Ala	1.23694	0.306773	Indeterminate				1.23694	0.306773	Indeterminate
66	p.His66Gly	1.08362	0.115856	Neutral				1.08362	0.115856	Neutral
66	p.His66Val	1.40415	0.489696	Indeterminate				1.40415	0.489696	Indeterminate
66	p.His66Tyr	1.05415	0.0760859	Neutral				1.05415	0.0760859	Neutral
66	p.His66Cys	0.693913	-0.527174	Neutral				0.693913	-0.527174	Neutral
66	p.His66Trp	0.971526	-0.0416755	Neutral				0.971526	-0.0416755	Neutral
66	p.His66Phe	1.0007	0.00100427	Neutral				1.0007	0.00100427	Neutral
67	p.Gly67Asn	0.798176	-0.325222	Neutral				0.798176	-0.325222	Neutral
67	p.Gly67Lys	1.03863	0.0546764	Neutral				1.03863	0.0546764	Neutral
67	p.Gly67Thr	1.66055	0.731662	Indeterminate				1.66055	0.731662	Indeterminate
67	p.Gly67Arg	0.671679	-0.574156	Neutral				0.671679	-0.574156	Neutral
67	p.Gly67Ser	0.746181	-0.422402	Neutral				0.746181	-0.422402	Neutral
67	p.Gly67Ile	7.81522	2.96629	Deleterious				7.81522	2.96629	Deleterious
67	p.Gly67Met	1.17768	0.235946	Neutral				1.17768	0.235946	Neutral
67	p.Gly67His	0.759347	-0.397169	Neutral				0.759347	-0.397169	Neutral
67	p.Gly67Gln	0.609789	-0.713617	Neutral				0.609789	-0.713617	Neutral
67	p.Gly67Pro	15.5055	3.9547	Deleterious				15.5055	3.9547	Deleterious
67	p.Gly67Leu	0.963976	-0.0529313	Neutral				0.963976	-0.0529313	Neutral
67	p.Gly67Asp	0.821876	-0.283008	Neutral				0.821876	-0.283008	Neutral
67	p.Gly67Glu	0.81224	-0.300021	Neutral				0.81224	-0.300021	Neutral
67	p.Gly67Ala	0.644461	-0.633835	Neutral				0.644461	-0.633835	Neutral
67	p.Gly67Gly	1	0	Neutral				1	0	Neutral
67	p.Gly67Val	4.79268	2.26083	Deleterious				4.79268	2.26083	Deleterious
67	p.Gly67Tyr	0.908576	-0.138321	Neutral				0.908576	-0.138321	Neutral
67	p.Gly67Cys	1.14064	0.189846	Neutral				1.14064	0.189846	Neutral
67	p.Gly67Trp	1.4579	0.543891	Indeterminate				1.4579	0.543891	Indeterminate
67	p.Gly67Phe	1.17101	0.227756	Neutral				1.17101	0.227756	Neutral
68	p.Ala68Asn	3.17678	1.66757	Deleterious				3.17678	1.66757	Deleterious
68	p.Ala68Lys	4.01588	2.00571	Deleterious				4.01588	2.00571	Deleterious
68	p.Ala68Thr	1.3458	0.428466	Indeterminate				1.3458	0.428466	Indeterminate
68	p.Ala68Arg	4.04536	2.01627	Deleterious				4.04536	2.01627	Deleterious
68	p.Ala68Ser	0.963767	-0.0532442	Neutral				0.963767	-0.0532442	Neutral
68	p.Ala68Ile	3.27392	1.71102	Deleterious				3.27392	1.71102	Deleterious
68	p.Ala68Met	2.85611	1.51405	Deleterious				2.85611	1.51405	Deleterious
68	p.Ala68His	2.13727	1.09577	Deleterious				2.13727	1.09577	Deleterious
68	p.Ala68Gln	3.24704	1.69913	Deleterious				3.24704	1.69913	Deleterious
68	p.Ala68Pro	3.52827	1.81896	Deleterious				3.52827	1.81896	Deleterious
68	p.Ala68Leu	3.66003	1.87185	Deleterious				3.66003	1.87185	Deleterious
68	p.Ala68Asp	2.46416	1.30109	Deleterious				2.46416	1.30109	Deleterious
68	p.Ala68Glu	2.62471	1.39216	Deleterious				2.62471	1.39216	Deleterious
68	p.Ala68Ala	1	0	Neutral				1	0	Neutral
68	p.Ala68Gly	1.07487	0.104162	Neutral				1.07487	0.104162	Neutral
68	p.Ala68Val	1.77848	0.830647	Indeterminate				1.77848	0.830647	Indeterminate
68	p.Ala68Tyr	3.76872	1.91408	Deleterious				3.76872	1.91408	Deleterious
68	p.Ala68Cys	1.12647	0.171804	Neutral				1.12647	0.171804	Neutral
68	p.Ala68Trp	4.01406	2.00506	Deleterious				4.01406	2.00506	Deleterious
68	p.Ala68Phe	3.64869	1.86738	Deleterious				3.64869	1.86738	Deleterious
69	p.Glu69Asn	2.72158	1.44445	Deleterious				2.72158	1.44445	Deleterious
69	p.Glu69Lys	2.3435	1.22866	Deleterious				2.3435	1.22866	Deleterious
69	p.Glu69Thr	1.54041	0.623314	Indeterminate				1.54041	0.623314	Indeterminate
69	p.Glu69Arg	1.07539	0.104861	Neutral				1.07539	0.104861	Neutral
69	p.Glu69Ser	1.79959	0.847671	Indeterminate				1.79959	0.847671	Indeterminate
69	p.Glu69Ile	1.34298	0.425442	Indeterminate				1.34298	0.425442	Indeterminate
69	p.Glu69Met	2.31976	1.21397	Deleterious				2.31976	1.21397	Deleterious
69	p.Glu69His	1.4304	0.516419	Indeterminate				1.4304	0.516419	Indeterminate
69	p.Glu69Gln	1.3458	0.428464	Indeterminate				1.3458	0.428464	Indeterminate
69	p.Glu69Pro	4.85961	2.28084	Deleterious				4.85961	2.28084	Deleterious
69	p.Glu69Leu	2.64812	1.40497	Deleterious				2.64812	1.40497	Deleterious
69	p.Glu69Asp	1.27383	0.349172	Indeterminate				1.27383	0.349172	Indeterminate
69	p.Glu69Glu	1	0	Neutral				1	0	Neutral
69	p.Glu69Ala	0.81005	-0.303917	Neutral				0.81005	-0.303917	Neutral
69	p.Glu69Gly	1.67301	0.74245	Indeterminate				1.67301	0.74245	Indeterminate
69	p.Glu69Val	2.16526	1.11454	Deleterious				2.16526	1.11454	Deleterious
69	p.Glu69Tyr	1.40805	0.4937	Indeterminate				1.40805	0.4937	Indeterminate
69	p.Glu69Cys	1.40905	0.494724	Indeterminate				1.40905	0.494724	Indeterminate
69	p.Glu69Trp	1.9236	0.943806	Indeterminate				1.9236	0.943806	Indeterminate
69	p.Glu69Phe	1.59743	0.675754	Indeterminate				1.59743	0.675754	Indeterminate
70	p.Pro70Asn	1.37951	0.464153	Indeterminate				1.37951	0.464153	Indeterminate
70	p.Pro70Lys	1.94284	0.958164	Indeterminate				1.94284	0.958164	Indeterminate
70	p.Pro70Thr	1.17723	0.235392	Neutral				1.17723	0.235392	Neutral
70	p.Pro70Arg	1.09462	0.130431	Neutral				1.09462	0.130431	Neutral
70	p.Pro70Ser	2.28359	1.1913	Deleterious				2.28359	1.1913	Deleterious
70	p.Pro70Ile	0.955481	-0.0657015	Neutral				0.955481	-0.0657015	Neutral
70	p.Pro70Met	0.51144	-0.967364	Neutral				0.51144	-0.967364	Neutral
70	p.Pro70His	0.470028	-1.08918	Neutral				0.470028	-1.08918	Neutral
70	p.Pro70Gln	0.427702	-1.22532	Neutral				0.427702	-1.22532	Neutral
70	p.Pro70Pro	1	0	Neutral				1	0	Neutral
70	p.Pro70Leu	1.2343	0.303696	Indeterminate				1.2343	0.303696	Indeterminate
70	p.Pro70Asp	10.8489	3.43948	Deleterious				10.8489	3.43948	Deleterious
70	p.Pro70Glu	5.21758	2.38338	Deleterious				5.21758	2.38338	Deleterious
70	p.Pro70Ala	0.997201	-0.00404386	Neutral				0.997201	-0.00404386	Neutral
70	p.Pro70Gly	1.03426	0.0485949	Neutral				1.03426	0.0485949	Neutral
70	p.Pro70Val	0.688016	-0.539485	Neutral				0.688016	-0.539485	Neutral
70	p.Pro70Tyr	0.955628	-0.0654792	Neutral				0.955628	-0.0654792	Neutral
70	p.Pro70Cys	0.401602	-1.31616	Neutral				0.401602	-1.31616	Neutral
70	p.Pro70Trp	3.19065	1.67385	Deleterious				3.19065	1.67385	Deleterious
70	p.Pro70Phe	0.851727	-0.231537	Neutral				0.851727	-0.231537	Neutral
71	p.Asn71Asn	1	0	Neutral				1	0	Neutral
71	p.Asn71Lys	17.908	4.16253	Deleterious				17.908	4.16253	Deleterious
71	p.Asn71Thr	3.40414	1.76729	Deleterious				3.40414	1.76729	Deleterious
71	p.Asn71Arg	13.9228	3.79938	Deleterious				13.9228	3.79938	Deleterious
71	p.Asn71Ser	30.0821	4.91083	Deleterious				30.0821	4.91083	Deleterious
71	p.Asn71Ile	39.1817	5.29211	Deleterious				39.1817	5.29211	Deleterious
71	p.Asn71Met	5.0015	2.32236	Deleterious				5.0015	2.32236	Deleterious
71	p.Asn71His	1.98075	0.986047	Indeterminate				1.98075	0.986047	Indeterminate
71	p.Asn71Gln	1.66153	0.73251	Indeterminate				1.66153	0.73251	Indeterminate
71	p.Asn71Pro	84.5928	6.40246	Deleterious				84.5928	6.40246	Deleterious
71	p.Asn71Leu	32.4861	5.02175	Deleterious				32.4861	5.02175	Deleterious
71	p.Asn71Asp	2.306	1.20539	Deleterious				2.306	1.20539	Deleterious
71	p.Asn71Glu	1.8948	0.922043	Indeterminate				1.8948	0.922043	Indeterminate
71	p.Asn71Ala	2.26452	1.1792	Deleterious				2.26452	1.1792	Deleterious
71	p.Asn71Gly	1.05572	0.0782258	Neutral				1.05572	0.0782258	Neutral
71	p.Asn71Val	28.7696	4.84648	Deleterious				28.7696	4.84648	Deleterious
71	p.Asn71Tyr	17.6183	4.139	Deleterious				17.6183	4.139	Deleterious
71	p.Asn71Cys	1.77061	0.824248	Indeterminate				1.77061	0.824248	Indeterminate
71	p.Asn71Trp	6.46546	2.69275	Deleterious				6.46546	2.69275	Deleterious
71	p.Asn71Phe	17.5458	4.13305	Deleterious				17.5458	4.13305	Deleterious
72	p.Cys72Asn	1.42491	0.510866	Indeterminate	0.930213	-0.104366	Neutral	1.17756	0.2358	Neutral
72	p.Cys72Lys	1.31932	0.399795	Indeterminate	1.03933	0.0556544	Neutral	1.17933	0.237962	Neutral
72	p.Cys72Thr	1.37045	0.454646	Indeterminate	0.849728	-0.234927	Neutral	1.11009	0.150673	Neutral
72	p.Cys72Arg	0.89512	-0.159847	Neutral	0.702693	-0.509033	Neutral	0.798907	-0.323901	Neutral
72	p.Cys72Ser	1.29201	0.369614	Indeterminate	1.21119	0.276427	Indeterminate	1.2516	0.323773	Indeterminate
72	p.Cys72Ile	1.37107	0.455304	Indeterminate	1.12159	0.165541	Neutral	1.24633	0.317685	Indeterminate
72	p.Cys72Met	1.00464	0.00667639	Neutral	1.02512	0.0357877	Neutral	1.01488	0.0213055	Neutral
72	p.Cys72His	1.07994	0.11095	Neutral	1.11008	0.150662	Neutral	1.09501	0.130943	Neutral
72	p.Cys72Gln	1.56821	0.649115	Indeterminate	0.819414	-0.287335	Neutral	1.19381	0.255573	Indeterminate
72	p.Cys72Pro	1.58647	0.665822	Indeterminate	0.815775	-0.293757	Neutral	1.20112	0.264384	Indeterminate
72	p.Cys72Leu	1.44483	0.530896	Indeterminate	1.13691	0.185114	Neutral	1.29087	0.36834	Indeterminate
72	p.Cys72Asp	1.02422	0.0345277	Neutral	1.27663	0.352338	Indeterminate	1.15042	0.202166	Neutral
72	p.Cys72Glu	1.20206	0.265503	Indeterminate	1.2286	0.29702	Indeterminate	1.21533	0.281348	Indeterminate
72	p.Cys72Ala	1.08988	0.124171	Neutral	1.23597	0.305649	Indeterminate	1.16293	0.217762	Neutral
72	p.Cys72Gly	1.05355	0.0752565	Neutral	0.600328	-0.736176	Neutral	0.826938	-0.274148	Neutral
72	p.Cys72Val	1.33442	0.416211	Indeterminate	1.28688	0.363877	Indeterminate	1.31065	0.390281	Indeterminate
72	p.Cys72Tyr	1.12383	0.16842	Neutral	0.958841	-0.0606364	Neutral	1.04133	0.0584327	Neutral
72	p.Cys72Cys	1	0	Neutral	1	0	Neutral	1	0	Neutral
72	p.Cys72Trp	1.78225	0.833703	Indeterminate	1.06124	0.0857525	Neutral	1.42175	0.507665	Indeterminate
72	p.Cys72Phe	0.990951	-0.0131139	Neutral	1.56623	0.647296	Indeterminate	1.27859	0.354555	Indeterminate
73	p.Ala73Asn	1.22405	0.291667	Indeterminate	1.06441	0.0900515	Neutral	1.14423	0.194378	Neutral
73	p.Ala73Lys	0.774666	-0.368354	Neutral	1.01586	0.0227087	Neutral	0.895265	-0.159613	Neutral
73	p.Ala73Thr	1.07329	0.102046	Neutral	0.924938	-0.112572	Neutral	0.999116	-0.00127571	Neutral
73	p.Ala73Arg	1.17231	0.22936	Neutral	0.932905	-0.100198	Neutral	1.05261	0.0739707	Neutral
73	p.Ala73Ser	1.10736	0.147129	Neutral	0.996057	-0.00569987	Neutral	1.05171	0.0727374	Neutral
73	p.Ala73Ile	0.809757	-0.30444	Neutral	0.973899	-0.0381559	Neutral	0.891828	-0.165163	Neutral
73	p.Ala73Met	0.817067	-0.291474	Neutral	1.0003	0.000433496	Neutral	0.908684	-0.13815	Neutral
73	p.Ala73His	0.898759	-0.153994	Neutral	0.952917	-0.0695771	Neutral	0.925838	-0.111168	Neutral
73	p.Ala73Gln	1.03419	0.0485026	Neutral	0.950008	-0.0739878	Neutral	0.9921	-0.011443	Neutral
73	p.Ala73Pro	0.999752	-0.00035766	Neutral	1.0797	0.110624	Neutral	1.03972	0.0562001	Neutral
73	p.Ala73Leu	0.852028	-0.231027	Neutral	0.992292	-0.0111629	Neutral	0.92216	-0.116911	Neutral
73	p.Ala73Asp	1.01066	0.015301	Neutral	0.896005	-0.158421	Neutral	0.953334	-0.0689469	Neutral
73	p.Ala73Glu	0.925628	-0.111495	Neutral	1.01884	0.0269281	Neutral	0.972234	-0.0406241	Neutral
73	p.Ala73Ala	1	0	Neutral	1	0	Neutral	1	0	Neutral
73	p.Ala73Gly	1.11071	0.151484	Neutral	1.00685	0.00985206	Neutral	1.05878	0.0824053	Neutral
73	p.Ala73Val	1.12256	0.166798	Neutral	0.881126	-0.182579	Neutral	1.00185	0.00265987	Neutral
73	p.Ala73Tyr	1.07968	0.110606	Neutral	1.15627	0.209475	Neutral	1.11797	0.160887	Neutral
73	p.Ala73Cys	1.08921	0.123283	Neutral	0.972016	-0.0409477	Neutral	1.03061	0.0435034	Neutral
73	p.Ala73Trp	1.19559	0.257727	Indeterminate	0.968656	-0.0459432	Neutral	1.08213	0.113867	Neutral
73	p.Ala73Phe	0.875364	-0.192044	Neutral	1.02034	0.0290553	Neutral	0.947854	-0.0772632	Neutral
74	p.Asp74Asn	1.62996	0.704837	Indeterminate	1.88867	0.91737	Indeterminate	1.75931	0.815014	Indeterminate
74	p.Asp74Lys	12.0992	3.59684	Deleterious	7.35941	2.87959	Deleterious	9.7293	3.28234	Deleterious
74	p.Asp74Thr	5.11442	2.35457	Deleterious	3.90448	1.96513	Deleterious	4.50945	2.17295	Deleterious
74	p.Asp74Arg	11.5095	3.52476	Deleterious	6.76489	2.75807	Deleterious	9.13722	3.19175	Deleterious
74	p.Asp74Ser	1.13028	0.176682	Neutral	1.56585	0.646946	Indeterminate	1.34807	0.430891	Indeterminate
74	p.Asp74Ile	13.434	3.74782	Deleterious	5.55789	2.47454	Deleterious	9.49596	3.24731	Deleterious
74	p.Asp74Met	6.00562	2.58631	Deleterious	4.26326	2.09196	Deleterious	5.13444	2.36021	Deleterious
74	p.Asp74His	1.14144	0.19085	Neutral	1.01738	0.024859	Neutral	1.07941	0.110241	Neutral
74	p.Asp74Gln	6.48628	2.69739	Deleterious	3.92549	1.97287	Deleterious	5.20589	2.38014	Deleterious
74	p.Asp74Pro	12.9077	3.69016	Deleterious	6.59211	2.72074	Deleterious	9.74991	3.28539	Deleterious
74	p.Asp74Leu	7.86437	2.97533	Deleterious	5.09468	2.34899	Deleterious	6.47953	2.69589	Deleterious
74	p.Asp74Asp	1	0	Neutral	1	0	Neutral	1	0	Neutral
74	p.Asp74Glu	0.499838	-1.00047	Neutral	0.409102	-1.28947	Neutral	0.45447	-1.13774	Neutral
74	p.Asp74Ala	3.03525	1.60182	Deleterious	2.46765	1.30314	Deleterious	2.75145	1.46019	Deleterious
74	p.Asp74Gly	2.17064	1.11812	Deleterious	1.86261	0.897328	Indeterminate	2.01663	1.01194	Indeterminate
74	p.Asp74Val	9.32302	3.2208	Deleterious	5.20231	2.37915	Deleterious	7.26266	2.8605	Deleterious
74	p.Asp74Tyr	6.61349	2.72541	Deleterious	3.82278	1.93462	Deleterious	5.21814	2.38353	Deleterious
74	p.Asp74Cys	0.656613	-0.606886	Neutral	0.705493	-0.503297	Neutral	0.681053	-0.554162	Neutral
74	p.Asp74Trp	7.08802	2.82538	Deleterious	4.05083	2.01822	Deleterious	5.56943	2.47753	Deleterious
74	p.Asp74Phe	8.16592	3.02962	Deleterious	5.13776	2.36114	Deleterious	6.65184	2.73375	Deleterious
75	p.Pro75Asn	1.03177	0.0451254	Neutral	1.12678	0.172201	Neutral	1.07927	0.110062	Neutral
75	p.Pro75Lys	1.24191	0.312558	Indeterminate	1.10154	0.139524	Neutral	1.17172	0.228633	Neutral
75	p.Pro75Thr	1.16537	0.220782	Neutral	0.984595	-0.0223984	Neutral	1.07498	0.10431	Neutral
75	p.Pro75Arg	0.884576	-0.176942	Neutral	1.01334	0.0191175	Neutral	0.948958	-0.0755845	Neutral
75	p.Pro75Ser	1.15066	0.202461	Neutral	0.868258	-0.203804	Neutral	1.00946	0.0135819	Neutral
75	p.Pro75Ile	0.943857	-0.0833595	Neutral	1.17778	0.236066	Neutral	1.06082	0.0851756	Neutral
75	p.Pro75Met	1.24808	0.319715	Indeterminate	1.06073	0.0850541	Neutral	1.15441	0.207151	Neutral
75	p.Pro75His	0.943234	-0.0843121	Neutral	0.767152	-0.382416	Neutral	0.855193	-0.225678	Neutral
75	p.Pro75Gln	1.19284	0.254396	Indeterminate	0.985547	-0.0210041	Neutral	1.08919	0.123258	Neutral
75	p.Pro75Pro	1	0	Neutral	1	0	Neutral	1	0	Neutral
75	p.Pro75Leu	1.02506	0.0357122	Neutral	0.961989	-0.0559084	Neutral	0.993526	-0.00937091	Neutral
75	p.Pro75Asp	1.0287	0.0408205	Neutral	0.929877	-0.104888	Neutral	0.979288	-0.030195	Neutral
75	p.Pro75Glu	1.07544	0.104929	Neutral	0.89529	-0.159573	Neutral	0.985366	-0.0212687	Neutral
75	p.Pro75Ala	1.07362	0.102478	Neutral	0.978853	-0.030836	Neutral	1.02623	0.0373605	Neutral
75	p.Pro75Gly	1.01088	0.0156135	Neutral	0.915788	-0.126914	Neutral	0.963335	-0.0538907	Neutral
75	p.Pro75Val	1.06506	0.0909409	Neutral	1.10302	0.141461	Neutral	1.08404	0.116422	Neutral
75	p.Pro75Tyr	1.05132	0.0721994	Neutral	1.06372	0.0891185	Neutral	1.05752	0.0806838	Neutral
75	p.Pro75Cys	1.10487	0.143873	Neutral	0.922095	-0.117012	Neutral	1.01348	0.0193194	Neutral
75	p.Pro75Trp	1.19446	0.256363	Indeterminate	1.12119	0.165026	Neutral	1.15782	0.211417	Neutral
75	p.Pro75Phe	1.05948	0.0833502	Neutral	1.06174	0.0864311	Neutral	1.06061	0.0848915	Neutral
76	p.Ala76Asn	1.90187	0.927421	Indeterminate				1.90187	0.927421	Indeterminate
76	p.Ala76Lys	1.76177	0.817022	Indeterminate				1.76177	0.817022	Indeterminate
76	p.Ala76Thr	1.38812	0.47313	Indeterminate				1.38812	0.47313	Indeterminate
76	p.Ala76Arg	1.81168	0.857325	Indeterminate				1.81168	0.857325	Indeterminate
76	p.Ala76Ser	1.745	0.803224	Indeterminate				1.745	0.803224	Indeterminate
76	p.Ala76Ile	1.84244	0.881615	Indeterminate				1.84244	0.881615	Indeterminate
76	p.Ala76Met	1.38263	0.467417	Indeterminate				1.38263	0.467417	Indeterminate
76	p.Ala76His	1.66149	0.732475	Indeterminate				1.66149	0.732475	Indeterminate
76	p.Ala76Gln	1.78553	0.83635	Indeterminate				1.78553	0.83635	Indeterminate
76	p.Ala76Pro	1.53591	0.619092	Indeterminate				1.53591	0.619092	Indeterminate
76	p.Ala76Leu	1.65547	0.727243	Indeterminate				1.65547	0.727243	Indeterminate
76	p.Ala76Asp	1.552	0.634131	Indeterminate				1.552	0.634131	Indeterminate
76	p.Ala76Glu	1.76165	0.816929	Indeterminate				1.76165	0.816929	Indeterminate
76	p.Ala76Ala	1	0	Neutral				1	0	Neutral
76	p.Ala76Gly	1.44637	0.532434	Indeterminate				1.44637	0.532434	Indeterminate
76	p.Ala76Val	1.38182	0.46657	Indeterminate				1.38182	0.46657	Indeterminate
76	p.Ala76Tyr	1.4366	0.52266	Indeterminate				1.4366	0.52266	Indeterminate
76	p.Ala76Cys	1.99709	0.997901	Indeterminate				1.99709	0.997901	Indeterminate
76	p.Ala76Trp	1.38228	0.467048	Indeterminate				1.38228	0.467048	Indeterminate
76	p.Ala76Phe	1.62413	0.699671	Indeterminate				1.62413	0.699671	Indeterminate
77	p.Thr77Asn	1.46216	0.548098	Indeterminate				1.46216	0.548098	Indeterminate
77	p.Thr77Lys	1.54641	0.62892	Indeterminate				1.54641	0.62892	Indeterminate
77	p.Thr77Thr	1	0	Neutral				1	0	Neutral
77	p.Thr77Arg	1.70308	0.768148	Indeterminate				1.70308	0.768148	Indeterminate
77	p.Thr77Ser	1.51107	0.595566	Indeterminate				1.51107	0.595566	Indeterminate
77	p.Thr77Ile	1.26922	0.343943	Indeterminate				1.26922	0.343943	Indeterminate
77	p.Thr77Met	1.32134	0.401998	Indeterminate				1.32134	0.401998	Indeterminate
77	p.Thr77His	1.34099	0.423296	Indeterminate				1.34099	0.423296	Indeterminate
77	p.Thr77Gln	1.40816	0.493807	Indeterminate				1.40816	0.493807	Indeterminate
77	p.Thr77Pro	2.68141	1.42299	Deleterious				2.68141	1.42299	Deleterious
77	p.Thr77Leu	1.54728	0.629733	Indeterminate				1.54728	0.629733	Indeterminate
77	p.Thr77Asp	1.28381	0.360432	Indeterminate				1.28381	0.360432	Indeterminate
77	p.Thr77Glu	2.04164	1.02973	Indeterminate				2.04164	1.02973	Indeterminate
77	p.Thr77Ala	1.55088	0.63309	Indeterminate				1.55088	0.63309	Indeterminate
77	p.Thr77Gly	1.27	0.344823	Indeterminate				1.27	0.344823	Indeterminate
77	p.Thr77Val	1.7598	0.81541	Indeterminate				1.7598	0.81541	Indeterminate
77	p.Thr77Tyr	1.32786	0.409098	Indeterminate				1.32786	0.409098	Indeterminate
77	p.Thr77Cys	1.3843	0.469155	Indeterminate				1.3843	0.469155	Indeterminate
77	p.Thr77Trp	1.2046	0.268555	Indeterminate				1.2046	0.268555	Indeterminate
77	p.Thr77Phe	1.14042	0.189561	Neutral				1.14042	0.189561	Neutral
78	p.Leu78Asn	0.713817	-0.486374	Neutral				0.713817	-0.486374	Neutral
78	p.Leu78Lys	0.80688	-0.309574	Neutral				0.80688	-0.309574	Neutral
78	p.Leu78Thr	0.817039	-0.291522	Neutral				0.817039	-0.291522	Neutral
78	p.Leu78Arg	1.4795	0.565108	Indeterminate				1.4795	0.565108	Indeterminate
78	p.Leu78Ser	0.531839	-0.91094	Neutral				0.531839	-0.91094	Neutral
78	p.Leu78Ile	0.91535	-0.127604	Neutral				0.91535	-0.127604	Neutral
78	p.Leu78Met	1.36253	0.446284	Indeterminate				1.36253	0.446284	Indeterminate
78	p.Leu78His	0.976338	-0.0345468	Neutral				0.976338	-0.0345468	Neutral
78	p.Leu78Gln	1.25663	0.329559	Indeterminate				1.25663	0.329559	Indeterminate
78	p.Leu78Pro	1.60099	0.678966	Indeterminate				1.60099	0.678966	Indeterminate
78	p.Leu78Leu	1	0	Neutral				1	0	Neutral
78	p.Leu78Asp	0.454398	-1.13797	Neutral				0.454398	-1.13797	Neutral
78	p.Leu78Glu	1.24063	0.311069	Indeterminate				1.24063	0.311069	Indeterminate
78	p.Leu78Ala	1.23052	0.299262	Indeterminate				1.23052	0.299262	Indeterminate
78	p.Leu78Gly	0.18304	-2.44977	Neutral				0.18304	-2.44977	Neutral
78	p.Leu78Val	0.802464	-0.317492	Neutral				0.802464	-0.317492	Neutral
78	p.Leu78Tyr	1.13289	0.180012	Neutral				1.13289	0.180012	Neutral
78	p.Leu78Cys	1.02921	0.0415374	Neutral				1.02921	0.0415374	Neutral
78	p.Leu78Trp	0.714273	-0.485453	Neutral				0.714273	-0.485453	Neutral
78	p.Leu78Phe	0.666459	-0.585413	Neutral				0.666459	-0.585413	Neutral
79	p.Thr79Asn	0.815945	-0.293455	Neutral				0.815945	-0.293455	Neutral
79	p.Thr79Lys	0.951575	-0.0716111	Neutral				0.951575	-0.0716111	Neutral
79	p.Thr79Thr	1	0	Neutral				1	0	Neutral
79	p.Thr79Arg	1.23679	0.306599	Indeterminate				1.23679	0.306599	Indeterminate
79	p.Thr79Ser	0.832935	-0.263725	Neutral				0.832935	-0.263725	Neutral
79	p.Thr79Ile	0.782036	-0.354693	Neutral				0.782036	-0.354693	Neutral
79	p.Thr79Met	0.959766	-0.0592456	Neutral				0.959766	-0.0592456	Neutral
79	p.Thr79His	0.942754	-0.0850464	Neutral				0.942754	-0.0850464	Neutral
79	p.Thr79Gln	0.8086	-0.306501	Neutral				0.8086	-0.306501	Neutral
79	p.Thr79Pro	2.62141	1.39034	Deleterious				2.62141	1.39034	Deleterious
79	p.Thr79Leu	1.05856	0.0821089	Neutral				1.05856	0.0821089	Neutral
79	p.Thr79Asp	0.969374	-0.0448742	Neutral				0.969374	-0.0448742	Neutral
79	p.Thr79Glu	0.845352	-0.242376	Neutral				0.845352	-0.242376	Neutral
79	p.Thr79Ala	0.988687	-0.0164143	Neutral				0.988687	-0.0164143	Neutral
79	p.Thr79Gly	1.03095	0.043976	Neutral				1.03095	0.043976	Neutral
79	p.Thr79Val	1.04118	0.0582169	Neutral				1.04118	0.0582169	Neutral
79	p.Thr79Tyr	0.987766	-0.0177593	Neutral				0.987766	-0.0177593	Neutral
79	p.Thr79Cys	1.09681	0.133319	Neutral				1.09681	0.133319	Neutral
79	p.Thr79Trp	1.13632	0.184364	Neutral				1.13632	0.184364	Neutral
79	p.Thr79Phe	0.948357	-0.0764975	Neutral				0.948357	-0.0764975	Neutral
80	p.Arg80Asn	1.66931	0.739253	Indeterminate				1.66931	0.739253	Indeterminate
80	p.Arg80Lys	1.22384	0.291413	Indeterminate				1.22384	0.291413	Indeterminate
80	p.Arg80Thr	1.18165	0.240799	Indeterminate				1.18165	0.240799	Indeterminate
80	p.Arg80Arg	1	0	Neutral				1	0	Neutral
80	p.Arg80Ser	1.17396	0.231389	Neutral				1.17396	0.231389	Neutral
80	p.Arg80Ile	2.44579	1.2903	Deleterious				2.44579	1.2903	Deleterious
80	p.Arg80Met	1.45372	0.539748	Indeterminate				1.45372	0.539748	Indeterminate
80	p.Arg80His	1.30932	0.388814	Indeterminate				1.30932	0.388814	Indeterminate
80	p.Arg80Gln	1.53927	0.622245	Indeterminate				1.53927	0.622245	Indeterminate
80	p.Arg80Pro	4.65825	2.21979	Deleterious				4.65825	2.21979	Deleterious
80	p.Arg80Leu	1.47189	0.557672	Indeterminate				1.47189	0.557672	Indeterminate
80	p.Arg80Asp	1.61067	0.687658	Indeterminate				1.61067	0.687658	Indeterminate
80	p.Arg80Glu	1.15832	0.212028	Neutral				1.15832	0.212028	Neutral
80	p.Arg80Ala	1.31885	0.399286	Indeterminate				1.31885	0.399286	Indeterminate
80	p.Arg80Gly	1.33526	0.417125	Indeterminate				1.33526	0.417125	Indeterminate
80	p.Arg80Val	1.63719	0.711221	Indeterminate				1.63719	0.711221	Indeterminate
80	p.Arg80Tyr	1.46144	0.54739	Indeterminate				1.46144	0.54739	Indeterminate
80	p.Arg80Cys	0.884946	-0.176339	Neutral				0.884946	-0.176339	Neutral
80	p.Arg80Trp	1.46814	0.55399	Indeterminate				1.46814	0.55399	Indeterminate
80	p.Arg80Phe	1.54724	0.629701	Indeterminate				1.54724	0.629701	Indeterminate
81	p.Pro81Asn	4.72312	2.23974	Deleterious				4.72312	2.23974	Deleterious
81	p.Pro81Lys	6.34759	2.66621	Deleterious				6.34759	2.66621	Deleterious
81	p.Pro81Thr	2.71588	1.44142	Deleterious				2.71588	1.44142	Deleterious
81	p.Pro81Arg	4.70494	2.23418	Deleterious				4.70494	2.23418	Deleterious
81	p.Pro81Ser	3.30418	1.72429	Deleterious				3.30418	1.72429	Deleterious
81	p.Pro81Ile	3.51653	1.81415	Deleterious				3.51653	1.81415	Deleterious
81	p.Pro81Met	4.36599	2.12631	Deleterious				4.36599	2.12631	Deleterious
81	p.Pro81His	5.15087	2.36482	Deleterious				5.15087	2.36482	Deleterious
81	p.Pro81Gln	7.77979	2.95973	Deleterious				7.77979	2.95973	Deleterious
81	p.Pro81Pro	1	0	Neutral				1	0	Neutral
81	p.Pro81Leu	3.71405	1.89299	Deleterious				3.71405	1.89299	Deleterious
81	p.Pro81Asp	5.03499	2.33199	Deleterious				5.03499	2.33199	Deleterious
81	p.Pro81Glu	6.19735	2.63165	Deleterious				6.19735	2.63165	Deleterious
81	p.Pro81Ala	1.67403	0.743323	Indeterminate				1.67403	0.743323	Indeterminate
81	p.Pro81Gly	3.89916	1.96316	Deleterious				3.89916	1.96316	Deleterious
81	p.Pro81Val	2.61563	1.38716	Deleterious				2.61563	1.38716	Deleterious
81	p.Pro81Tyr	4.29555	2.10284	Deleterious				4.29555	2.10284	Deleterious
81	p.Pro81Cys	2.08405	1.05939	Indeterminate				2.08405	1.05939	Indeterminate
81	p.Pro81Trp	5.08061	2.345	Deleterious				5.08061	2.345	Deleterious
81	p.Pro81Phe	4.51194	2.17375	Deleterious				4.51194	2.17375	Deleterious
82	p.Val82Asn	2.3522	1.23401	Deleterious				2.3522	1.23401	Deleterious
82	p.Val82Lys	3.02525	1.59706	Deleterious				3.02525	1.59706	Deleterious
82	p.Val82Thr	1.49705	0.582121	Indeterminate				1.49705	0.582121	Indeterminate
82	p.Val82Arg	3.08892	1.6271	Deleterious				3.08892	1.6271	Deleterious
82	p.Val82Ser	1.35722	0.44065	Indeterminate				1.35722	0.44065	Indeterminate
82	p.Val82Ile	1.28062	0.356843	Indeterminate				1.28062	0.356843	Indeterminate
82	p.Val82Met	0.829095	-0.27039	Neutral				0.829095	-0.27039	Neutral
82	p.Val82His	2.44885	1.29211	Deleterious				2.44885	1.29211	Deleterious
82	p.Val82Gln	1.4141	0.499881	Indeterminate				1.4141	0.499881	Indeterminate
82	p.Val82Pro	2.03543	1.02533	Indeterminate				2.03543	1.02533	Indeterminate
82	p.Val82Leu	1.13822	0.186781	Neutral				1.13822	0.186781	Neutral
82	p.Val82Asp	2.78084	1.47552	Deleterious				2.78084	1.47552	Deleterious
82	p.Val82Glu	2.14476	1.10082	Deleterious				2.14476	1.10082	Deleterious
82	p.Val82Ala	1.00728	0.0104583	Neutral				1.00728	0.0104583	Neutral
82	p.Val82Gly	2.03661	1.02617	Indeterminate				2.03661	1.02617	Indeterminate
82	p.Val82Val	1	0	Neutral				1	0	Neutral
82	p.Val82Tyr	2.88746	1.5298	Deleterious				2.88746	1.5298	Deleterious
82	p.Val82Cys	1.33055	0.412024	Indeterminate				1.33055	0.412024	Indeterminate
82	p.Val82Trp	3.54518	1.82586	Deleterious				3.54518	1.82586	Deleterious
82	p.Val82Phe	1.7959	0.844706	Indeterminate				1.7959	0.844706	Indeterminate
83	p.His83Asn	7.57402	2.92106	Deleterious				7.57402	2.92106	Deleterious
83	p.His83Lys	10.5832	3.4037	Deleterious				10.5832	3.4037	Deleterious
83	p.His83Thr	6.27685	2.65004	Deleterious				6.27685	2.65004	Deleterious
83	p.His83Arg	11.176	3.48233	Deleterious				11.176	3.48233	Deleterious
83	p.His83Ser	6.08168	2.60447	Deleterious				6.08168	2.60447	Deleterious
83	p.His83Ile	6.53629	2.70847	Deleterious				6.53629	2.70847	Deleterious
83	p.His83Met	2.20829	1.14293	Deleterious				2.20829	1.14293	Deleterious
83	p.His83His	1	0	Neutral				1	0	Neutral
83	p.His83Gln	3.9988	1.99957	Deleterious				3.9988	1.99957	Deleterious
83	p.His83Pro	11.5288	3.52717	Deleterious				11.5288	3.52717	Deleterious
83	p.His83Leu	5.88501	2.55704	Deleterious				5.88501	2.55704	Deleterious
83	p.His83Asp	10.7071	3.42049	Deleterious				10.7071	3.42049	Deleterious
83	p.His83Glu	10.0619	3.33084	Deleterious				10.0619	3.33084	Deleterious
83	p.His83Ala	2.62226	1.39081	Deleterious				2.62226	1.39081	Deleterious
83	p.His83Gly	7.33565	2.87492	Deleterious				7.33565	2.87492	Deleterious
83	p.His83Val	9.69691	3.27753	Deleterious				9.69691	3.27753	Deleterious
83	p.His83Tyr	10.7612	3.42776	Deleterious				10.7612	3.42776	Deleterious
83	p.His83Cys	6.85225	2.77658	Deleterious				6.85225	2.77658	Deleterious
83	p.His83Trp	11.2773	3.49535	Deleterious				11.2773	3.49535	Deleterious
83	p.His83Phe	6.61005	2.72466	Deleterious				6.61005	2.72466	Deleterious
84	p.Asp84Asn	15.8103	3.98279	Deleterious				15.8103	3.98279	Deleterious
84	p.Asp84Lys	22.6595	4.50205	Deleterious				22.6595	4.50205	Deleterious
84	p.Asp84Thr	16.2866	4.02561	Deleterious				16.2866	4.02561	Deleterious
84	p.Asp84Arg	22.7523	4.50794	Deleterious				22.7523	4.50794	Deleterious
84	p.Asp84Ser	6.13537	2.61715	Deleterious				6.13537	2.61715	Deleterious
84	p.Asp84Ile	23.1171	4.53089	Deleterious				23.1171	4.53089	Deleterious
84	p.Asp84Met	19.7521	4.30394	Deleterious				19.7521	4.30394	Deleterious
84	p.Asp84His	8.99952	3.16985	Deleterious				8.99952	3.16985	Deleterious
84	p.Asp84Gln	11.4016	3.51116	Deleterious				11.4016	3.51116	Deleterious
84	p.Asp84Pro	22.5374	4.49425	Deleterious				22.5374	4.49425	Deleterious
84	p.Asp84Leu	23.4571	4.55195	Deleterious				23.4571	4.55195	Deleterious
84	p.Asp84Asp	1	0	Neutral				1	0	Neutral
84	p.Asp84Glu	1.50215	0.587027	Indeterminate				1.50215	0.587027	Indeterminate
84	p.Asp84Ala	17.1819	4.10282	Deleterious				17.1819	4.10282	Deleterious
84	p.Asp84Gly	19.2375	4.26585	Deleterious				19.2375	4.26585	Deleterious
84	p.Asp84Val	20.8963	4.38517	Deleterious				20.8963	4.38517	Deleterious
84	p.Asp84Tyr	19.9715	4.31987	Deleterious				19.9715	4.31987	Deleterious
84	p.Asp84Cys	5.8969	2.55996	Deleterious				5.8969	2.55996	Deleterious
84	p.Asp84Trp	24.7406	4.62881	Deleterious				24.7406	4.62881	Deleterious
84	p.Asp84Phe	21.6673	4.43745	Deleterious				21.6673	4.43745	Deleterious
85	p.Ala85Asn	1.29122	0.368732	Indeterminate				1.29122	0.368732	Indeterminate
85	p.Ala85Lys	2.24571	1.16717	Deleterious				2.24571	1.16717	Deleterious
85	p.Ala85Thr	1.44054	0.526614	Indeterminate				1.44054	0.526614	Indeterminate
85	p.Ala85Arg	2.23899	1.16285	Deleterious				2.23899	1.16285	Deleterious
85	p.Ala85Ser	1.07688	0.106854	Neutral				1.07688	0.106854	Neutral
85	p.Ala85Ile	1.55966	0.641234	Indeterminate				1.55966	0.641234	Indeterminate
85	p.Ala85Met	0.771565	-0.374141	Neutral				0.771565	-0.374141	Neutral
85	p.Ala85His	1.66435	0.734962	Indeterminate				1.66435	0.734962	Indeterminate
85	p.Ala85Gln	1.50171	0.586607	Indeterminate				1.50171	0.586607	Indeterminate
85	p.Ala85Pro	1.51107	0.595575	Indeterminate				1.51107	0.595575	Indeterminate
85	p.Ala85Leu	1.02525	0.0359722	Neutral				1.02525	0.0359722	Neutral
85	p.Ala85Asp	2.02691	1.01929	Indeterminate				2.02691	1.01929	Indeterminate
85	p.Ala85Glu	1.96421	0.973952	Indeterminate				1.96421	0.973952	Indeterminate
85	p.Ala85Ala	1	0	Neutral				1	0	Neutral
85	p.Ala85Gly	0.860123	-0.217385	Neutral				0.860123	-0.217385	Neutral
85	p.Ala85Val	1.33089	0.412391	Indeterminate				1.33089	0.412391	Indeterminate
85	p.Ala85Tyr	1.8232	0.866472	Indeterminate				1.8232	0.866472	Indeterminate
85	p.Ala85Cys	0.906309	-0.141926	Neutral				0.906309	-0.141926	Neutral
85	p.Ala85Trp	2.44227	1.28822	Deleterious				2.44227	1.28822	Deleterious
85	p.Ala85Phe	1.95014	0.963581	Indeterminate				1.95014	0.963581	Indeterminate
86	p.Ala86Asn	8.60371	3.10496	Deleterious				8.60371	3.10496	Deleterious
86	p.Ala86Lys	10.1149	3.3384	Deleterious				10.1149	3.3384	Deleterious
86	p.Ala86Thr	0.790809	-0.3386	Neutral				0.790809	-0.3386	Neutral
86	p.Ala86Arg	9.66542	3.27283	Deleterious				9.66542	3.27283	Deleterious
86	p.Ala86Ser	1.40201	0.487493	Indeterminate				1.40201	0.487493	Indeterminate
86	p.Ala86Ile	1.86456	0.898833	Indeterminate				1.86456	0.898833	Indeterminate
86	p.Ala86Met	7.54251	2.91505	Deleterious				7.54251	2.91505	Deleterious
86	p.Ala86His	8.50993	3.08915	Deleterious				8.50993	3.08915	Deleterious
86	p.Ala86Gln	9.27328	3.21308	Deleterious				9.27328	3.21308	Deleterious
86	p.Ala86Pro	8.616	3.10702	Deleterious				8.616	3.10702	Deleterious
86	p.Ala86Leu	7.57216	2.92071	Deleterious				7.57216	2.92071	Deleterious
86	p.Ala86Asp	8.98749	3.16792	Deleterious				8.98749	3.16792	Deleterious
86	p.Ala86Glu	9.11458	3.18818	Deleterious				9.11458	3.18818	Deleterious
86	p.Ala86Ala	1	0	Neutral				1	0	Neutral
86	p.Ala86Gly	0.86205	-0.214157	Neutral				0.86205	-0.214157	Neutral
86	p.Ala86Val	0.996205	-0.00548606	Neutral				0.996205	-0.00548606	Neutral
86	p.Ala86Tyr	9.41422	3.23484	Deleterious				9.41422	3.23484	Deleterious
86	p.Ala86Cys	0.662803	-0.593348	Neutral				0.662803	-0.593348	Neutral
86	p.Ala86Trp	8.4346	3.07632	Deleterious				8.4346	3.07632	Deleterious
86	p.Ala86Phe	8.65709	3.11388	Deleterious				8.65709	3.11388	Deleterious
87	p.Arg87Asn	1.09777	0.134572	Neutral				1.09777	0.134572	Neutral
87	p.Arg87Lys	0.387943	-1.36608	Neutral				0.387943	-1.36608	Neutral
87	p.Arg87Thr	1.05707	0.0800695	Neutral				1.05707	0.0800695	Neutral
87	p.Arg87Arg	1	0	Neutral				1	0	Neutral
87	p.Arg87Ser	2.13472	1.09405	Deleterious				2.13472	1.09405	Deleterious
87	p.Arg87Ile	1.12891	0.174936	Neutral				1.12891	0.174936	Neutral
87	p.Arg87Met	1.70419	0.769087	Indeterminate				1.70419	0.769087	Indeterminate
87	p.Arg87His	1.92171	0.942389	Indeterminate				1.92171	0.942389	Indeterminate
87	p.Arg87Gln	2.09315	1.06568	Indeterminate				2.09315	1.06568	Indeterminate
87	p.Arg87Pro	34.879	5.12429	Deleterious				34.879	5.12429	Deleterious
87	p.Arg87Leu	1.32489	0.405871	Indeterminate				1.32489	0.405871	Indeterminate
87	p.Arg87Asp	6.02139	2.5901	Deleterious				6.02139	2.5901	Deleterious
87	p.Arg87Glu	3.26631	1.70766	Deleterious				3.26631	1.70766	Deleterious
87	p.Arg87Ala	2.60494	1.38125	Deleterious				2.60494	1.38125	Deleterious
87	p.Arg87Gly	0.811545	-0.301257	Neutral				0.811545	-0.301257	Neutral
87	p.Arg87Val	1.1493	0.200752	Neutral				1.1493	0.200752	Neutral
87	p.Arg87Tyr	1.81012	0.856083	Indeterminate				1.81012	0.856083	Indeterminate
87	p.Arg87Cys	0.742017	-0.430475	Neutral				0.742017	-0.430475	Neutral
87	p.Arg87Trp	20.3504	4.34698	Deleterious				20.3504	4.34698	Deleterious
87	p.Arg87Phe	1.2622	0.335935	Indeterminate				1.2622	0.335935	Indeterminate
88	p.Glu88Asn	1.29932	0.377758	Indeterminate				1.29932	0.377758	Indeterminate
88	p.Glu88Lys	1.94946	0.963077	Indeterminate				1.94946	0.963077	Indeterminate
88	p.Glu88Thr	1.29474	0.372663	Indeterminate				1.29474	0.372663	Indeterminate
88	p.Glu88Arg	1.88869	0.917386	Indeterminate				1.88869	0.917386	Indeterminate
88	p.Glu88Ser	1.21183	0.277182	Indeterminate				1.21183	0.277182	Indeterminate
88	p.Glu88Ile	1.17683	0.234904	Neutral				1.17683	0.234904	Neutral
88	p.Glu88Met	1.17001	0.226526	Neutral				1.17001	0.226526	Neutral
88	p.Glu88His	1.40208	0.487566	Indeterminate				1.40208	0.487566	Indeterminate
88	p.Glu88Gln	1.27311	0.34836	Indeterminate				1.27311	0.34836	Indeterminate
88	p.Glu88Pro	3.12859	1.64551	Deleterious				3.12859	1.64551	Deleterious
88	p.Glu88Leu	1.36587	0.449825	Indeterminate				1.36587	0.449825	Indeterminate
88	p.Glu88Asp	1.35571	0.439045	Indeterminate				1.35571	0.439045	Indeterminate
88	p.Glu88Glu	1	0	Neutral				1	0	Neutral
88	p.Glu88Ala	1.07538	0.10484	Neutral				1.07538	0.10484	Neutral
88	p.Glu88Gly	1.19933	0.262233	Indeterminate				1.19933	0.262233	Indeterminate
88	p.Glu88Val	1.31193	0.391692	Indeterminate				1.31193	0.391692	Indeterminate
88	p.Glu88Tyr	1.33669	0.418665	Indeterminate				1.33669	0.418665	Indeterminate
88	p.Glu88Cys	1.15369	0.206254	Neutral				1.15369	0.206254	Neutral
88	p.Glu88Trp	1.19872	0.261495	Indeterminate				1.19872	0.261495	Indeterminate
88	p.Glu88Phe	1.40859	0.494249	Indeterminate				1.40859	0.494249	Indeterminate
89	p.Gly89Asn	1.77501	0.827823	Indeterminate				1.77501	0.827823	Indeterminate
89	p.Gly89Lys	7.99335	2.9988	Deleterious				7.99335	2.9988	Deleterious
89	p.Gly89Thr	13.1426	3.71618	Deleterious				13.1426	3.71618	Deleterious
89	p.Gly89Arg	8.97586	3.16605	Deleterious				8.97586	3.16605	Deleterious
89	p.Gly89Ser	4.05612	2.0201	Deleterious				4.05612	2.0201	Deleterious
89	p.Gly89Ile	16.3011	4.0269	Deleterious				16.3011	4.0269	Deleterious
89	p.Gly89Met	11.6897	3.54716	Deleterious				11.6897	3.54716	Deleterious
89	p.Gly89His	9.7331	3.2829	Deleterious				9.7331	3.2829	Deleterious
89	p.Gly89Gln	8.24643	3.04377	Deleterious				8.24643	3.04377	Deleterious
89	p.Gly89Pro	11.3066	3.4991	Deleterious				11.3066	3.4991	Deleterious
89	p.Gly89Leu	13.5738	3.76275	Deleterious				13.5738	3.76275	Deleterious
89	p.Gly89Asp	3.52453	1.81743	Deleterious				3.52453	1.81743	Deleterious
89	p.Gly89Glu	10.2905	3.36324	Deleterious				10.2905	3.36324	Deleterious
89	p.Gly89Ala	2.07395	1.05238	Indeterminate				2.07395	1.05238	Indeterminate
89	p.Gly89Gly	1	0	Neutral				1	0	Neutral
89	p.Gly89Val	14.9559	3.90264	Deleterious				14.9559	3.90264	Deleterious
89	p.Gly89Tyr	14.0189	3.8093	Deleterious				14.0189	3.8093	Deleterious
89	p.Gly89Cys	4.05528	2.0198	Deleterious				4.05528	2.0198	Deleterious
89	p.Gly89Trp	14.232	3.83106	Deleterious				14.232	3.83106	Deleterious
89	p.Gly89Phe	13.7102	3.77718	Deleterious				13.7102	3.77718	Deleterious
90	p.Phe90Asn	0.889984	-0.168148	Neutral				0.889984	-0.168148	Neutral
90	p.Phe90Lys	1.21061	0.275739	Indeterminate				1.21061	0.275739	Indeterminate
90	p.Phe90Thr	1.15327	0.205731	Neutral				1.15327	0.205731	Neutral
90	p.Phe90Arg	0.959131	-0.0602004	Neutral				0.959131	-0.0602004	Neutral
90	p.Phe90Ser	0.944429	-0.0824853	Neutral				0.944429	-0.0824853	Neutral
90	p.Phe90Ile	0.869855	-0.201153	Neutral				0.869855	-0.201153	Neutral
90	p.Phe90Met	0.74912	-0.416731	Neutral				0.74912	-0.416731	Neutral
90	p.Phe90His	0.780642	-0.357267	Neutral				0.780642	-0.357267	Neutral
90	p.Phe90Gln	0.756427	-0.402728	Neutral				0.756427	-0.402728	Neutral
90	p.Phe90Pro	1.62256	0.698273	Indeterminate				1.62256	0.698273	Indeterminate
90	p.Phe90Leu	0.780357	-0.357795	Neutral				0.780357	-0.357795	Neutral
90	p.Phe90Asp	1.73393	0.794048	Indeterminate				1.73393	0.794048	Indeterminate
90	p.Phe90Glu	1.15381	0.206411	Neutral				1.15381	0.206411	Neutral
90	p.Phe90Ala	0.844552	-0.243741	Neutral				0.844552	-0.243741	Neutral
90	p.Phe90Gly	1.01227	0.0175931	Neutral				1.01227	0.0175931	Neutral
90	p.Phe90Val	1.10806	0.148039	Neutral				1.10806	0.148039	Neutral
90	p.Phe90Tyr	0.80022	-0.321531	Neutral				0.80022	-0.321531	Neutral
90	p.Phe90Cys	0.992443	-0.0109438	Neutral				0.992443	-0.0109438	Neutral
90	p.Phe90Trp	0.933875	-0.0986989	Neutral				0.933875	-0.0986989	Neutral
90	p.Phe90Phe	1	0	Neutral				1	0	Neutral
91	p.Leu91Asn	0.70073	-0.51307	Neutral				0.70073	-0.51307	Neutral
91	p.Leu91Lys	1.4308	0.516827	Indeterminate				1.4308	0.516827	Indeterminate
91	p.Leu91Thr	1.45589	0.541899	Indeterminate				1.45589	0.541899	Indeterminate
91	p.Leu91Arg	1.15735	0.210824	Neutral				1.15735	0.210824	Neutral
91	p.Leu91Ser	1.94104	0.956832	Indeterminate				1.94104	0.956832	Indeterminate
91	p.Leu91Ile	1.69848	0.76424	Indeterminate				1.69848	0.76424	Indeterminate
91	p.Leu91Met	2.60291	1.38013	Deleterious				2.60291	1.38013	Deleterious
91	p.Leu91His	1.67624	0.745225	Indeterminate				1.67624	0.745225	Indeterminate
91	p.Leu91Gln	0.794754	-0.331419	Neutral				0.794754	-0.331419	Neutral
91	p.Leu91Pro	1.52692	0.610629	Indeterminate				1.52692	0.610629	Indeterminate
91	p.Leu91Leu	1	0	Neutral				1	0	Neutral
91	p.Leu91Asp	1.30621	0.385383	Indeterminate				1.30621	0.385383	Indeterminate
91	p.Leu91Glu	1.3436	0.426108	Indeterminate				1.3436	0.426108	Indeterminate
91	p.Leu91Ala	1.02657	0.0378278	Neutral				1.02657	0.0378278	Neutral
91	p.Leu91Gly	1.38728	0.472262	Indeterminate				1.38728	0.472262	Indeterminate
91	p.Leu91Val	1.29048	0.367909	Indeterminate				1.29048	0.367909	Indeterminate
91	p.Leu91Tyr	3.09288	1.62895	Deleterious				3.09288	1.62895	Deleterious
91	p.Leu91Cys	0.963845	-0.053127	Neutral				0.963845	-0.053127	Neutral
91	p.Leu91Trp	1.58837	0.667551	Indeterminate				1.58837	0.667551	Indeterminate
91	p.Leu91Phe	2.1095	1.0769	Indeterminate				2.1095	1.0769	Indeterminate
92	p.Asp92Asn	1.05582	0.0783575	Neutral				1.05582	0.0783575	Neutral
92	p.Asp92Lys	1.23261	0.301718	Indeterminate				1.23261	0.301718	Indeterminate
92	p.Asp92Thr	0.896441	-0.157719	Neutral				0.896441	-0.157719	Neutral
92	p.Asp92Arg	1.02362	0.0336848	Neutral				1.02362	0.0336848	Neutral
92	p.Asp92Ser	0.965611	-0.0504857	Neutral				0.965611	-0.0504857	Neutral
92	p.Asp92Ile	1.18856	0.249212	Indeterminate				1.18856	0.249212	Indeterminate
92	p.Asp92Met	0.978386	-0.031524	Neutral				0.978386	-0.031524	Neutral
92	p.Asp92His	1.0941	0.129747	Neutral				1.0941	0.129747	Neutral
92	p.Asp92Gln	1.04065	0.0574894	Neutral				1.04065	0.0574894	Neutral
92	p.Asp92Pro	1.11253	0.15385	Neutral				1.11253	0.15385	Neutral
92	p.Asp92Leu	1.01535	0.021981	Neutral				1.01535	0.021981	Neutral
92	p.Asp92Asp	1	0	Neutral				1	0	Neutral
92	p.Asp92Glu	1.09965	0.137049	Neutral				1.09965	0.137049	Neutral
92	p.Asp92Ala	1.12396	0.168596	Neutral				1.12396	0.168596	Neutral
92	p.Asp92Gly	1.16621	0.221827	Neutral				1.16621	0.221827	Neutral
92	p.Asp92Val	1.02768	0.0393912	Neutral				1.02768	0.0393912	Neutral
92	p.Asp92Tyr	1.03608	0.051136	Neutral				1.03608	0.051136	Neutral
92	p.Asp92Cys	0.980999	-0.0276769	Neutral				0.980999	-0.0276769	Neutral
92	p.Asp92Trp	1.05397	0.0758278	Neutral				1.05397	0.0758278	Neutral
92	p.Asp92Phe	1.21246	0.277937	Indeterminate				1.21246	0.277937	Indeterminate
93	p.Thr93Asn	1.83211	0.873505	Indeterminate				1.83211	0.873505	Indeterminate
93	p.Thr93Lys	3.79891	1.92559	Deleterious				3.79891	1.92559	Deleterious
93	p.Thr93Thr	1	0	Neutral				1	0	Neutral
93	p.Thr93Arg	2.46357	1.30075	Deleterious				2.46357	1.30075	Deleterious
93	p.Thr93Ser	1.46292	0.548856	Indeterminate				1.46292	0.548856	Indeterminate
93	p.Thr93Ile	0.979211	-0.0303078	Neutral				0.979211	-0.0303078	Neutral
93	p.Thr93Met	1.76646	0.820863	Indeterminate				1.76646	0.820863	Indeterminate
93	p.Thr93His	2.44939	1.29242	Deleterious				2.44939	1.29242	Deleterious
93	p.Thr93Gln	2.19834	1.13641	Deleterious				2.19834	1.13641	Deleterious
93	p.Thr93Pro	6.25664	2.64539	Deleterious				6.25664	2.64539	Deleterious
93	p.Thr93Leu	1.61983	0.695839	Indeterminate				1.61983	0.695839	Indeterminate
93	p.Thr93Asp	2.94484	1.55819	Deleterious				2.94484	1.55819	Deleterious
93	p.Thr93Glu	2.42686	1.27909	Deleterious				2.42686	1.27909	Deleterious
93	p.Thr93Ala	2.31654	1.21197	Deleterious				2.31654	1.21197	Deleterious
93	p.Thr93Gly	2.45064	1.29316	Deleterious				2.45064	1.29316	Deleterious
93	p.Thr93Val	1.44838	0.534437	Indeterminate				1.44838	0.534437	Indeterminate
93	p.Thr93Tyr	2.8658	1.51894	Deleterious				2.8658	1.51894	Deleterious
93	p.Thr93Cys	1.62601	0.701338	Indeterminate				1.62601	0.701338	Indeterminate
93	p.Thr93Trp	2.31124	1.20867	Deleterious				2.31124	1.20867	Deleterious
93	p.Thr93Phe	1.97756	0.983719	Indeterminate				1.97756	0.983719	Indeterminate
94	p.Leu94Asn	2.31643	1.2119	Deleterious				2.31643	1.2119	Deleterious
94	p.Leu94Lys	6.24611	2.64296	Deleterious				6.24611	2.64296	Deleterious
94	p.Leu94Thr	2.4833	1.31226	Deleterious				2.4833	1.31226	Deleterious
94	p.Leu94Arg	8.15918	3.02842	Deleterious				8.15918	3.02842	Deleterious
94	p.Leu94Ser	0.960891	-0.057556	Neutral				0.960891	-0.057556	Neutral
94	p.Leu94Ile	0.68557	-0.544625	Neutral				0.68557	-0.544625	Neutral
94	p.Leu94Met	0.421832	-1.24526	Neutral				0.421832	-1.24526	Neutral
94	p.Leu94His	8.79547	3.13676	Deleterious				8.79547	3.13676	Deleterious
94	p.Leu94Gln	4.83404	2.27323	Deleterious				4.83404	2.27323	Deleterious
94	p.Leu94Pro	5.87425	2.5544	Deleterious				5.87425	2.5544	Deleterious
94	p.Leu94Leu	1	0	Neutral				1	0	Neutral
94	p.Leu94Asp	7.72995	2.95046	Deleterious				7.72995	2.95046	Deleterious
94	p.Leu94Glu	4.46584	2.15893	Deleterious				4.46584	2.15893	Deleterious
94	p.Leu94Ala	2.29784	1.20028	Deleterious				2.29784	1.20028	Deleterious
94	p.Leu94Gly	4.45947	2.15687	Deleterious				4.45947	2.15687	Deleterious
94	p.Leu94Val	1.21655	0.282796	Indeterminate				1.21655	0.282796	Indeterminate
94	p.Leu94Tyr	9.50787	3.24912	Deleterious				9.50787	3.24912	Deleterious
94	p.Leu94Cys	1.82993	0.871785	Indeterminate				1.82993	0.871785	Indeterminate
94	p.Leu94Trp	7.26206	2.86038	Deleterious				7.26206	2.86038	Deleterious
94	p.Leu94Phe	1.87341	0.905669	Indeterminate				1.87341	0.905669	Indeterminate
95	p.Val95Asn	1.08183	0.113477	Neutral				1.08183	0.113477	Neutral
95	p.Val95Lys	0.930173	-0.104429	Neutral				0.930173	-0.104429	Neutral
95	p.Val95Thr	0.993329	-0.00965676	Neutral				0.993329	-0.00965676	Neutral
95	p.Val95Arg	1.09442	0.130173	Neutral				1.09442	0.130173	Neutral
95	p.Val95Ser	1.07971	0.110642	Neutral				1.07971	0.110642	Neutral
95	p.Val95Ile	0.988822	-0.0162177	Neutral				0.988822	-0.0162177	Neutral
95	p.Val95Met	1.00154	0.00221951	Neutral				1.00154	0.00221951	Neutral
95	p.Val95His	0.778127	-0.361922	Neutral				0.778127	-0.361922	Neutral
95	p.Val95Gln	0.976216	-0.0347279	Neutral				0.976216	-0.0347279	Neutral
95	p.Val95Pro	4.78344	2.25805	Deleterious				4.78344	2.25805	Deleterious
95	p.Val95Leu	0.82117	-0.284247	Neutral				0.82117	-0.284247	Neutral
95	p.Val95Asp	0.961451	-0.0567146	Neutral				0.961451	-0.0567146	Neutral
95	p.Val95Glu	1.05385	0.0756724	Neutral				1.05385	0.0756724	Neutral
95	p.Val95Ala	0.737161	-0.439948	Neutral				0.737161	-0.439948	Neutral
95	p.Val95Gly	1.03031	0.0430851	Neutral				1.03031	0.0430851	Neutral
95	p.Val95Val	1	0	Neutral				1	0	Neutral
95	p.Val95Tyr	1.01573	0.0225163	Neutral				1.01573	0.0225163	Neutral
95	p.Val95Cys	0.822398	-0.282091	Neutral				0.822398	-0.282091	Neutral
95	p.Val95Trp	1.20918	0.274025	Indeterminate				1.20918	0.274025	Indeterminate
95	p.Val95Phe	1.10575	0.145031	Neutral				1.10575	0.145031	Neutral
96	p.Val96Asn	0.753131	-0.409027	Neutral	1.22286	0.290257	Indeterminate	0.987995	-0.0174247	Neutral
96	p.Val96Lys	0.890645	-0.167078	Neutral	0.942084	-0.0860721	Neutral	0.916365	-0.126006	Neutral
96	p.Val96Thr	0.691565	-0.532064	Neutral	0.924048	-0.11396	Neutral	0.807807	-0.307918	Neutral
96	p.Val96Arg	0.847296	-0.239062	Neutral	1.01685	0.0241044	Neutral	0.932072	-0.101487	Neutral
96	p.Val96Ser	0.750423	-0.414224	Neutral	0.784063	-0.350959	Neutral	0.767243	-0.382245	Neutral
96	p.Val96Ile	0.843437	-0.245648	Neutral	1.01477	0.0211553	Neutral	0.929104	-0.106088	Neutral
96	p.Val96Met	0.69688	-0.521018	Neutral	0.816129	-0.293131	Neutral	0.756504	-0.40258	Neutral
96	p.Val96His	0.934101	-0.0983492	Neutral	0.916382	-0.125979	Neutral	0.925242	-0.112098	Neutral
96	p.Val96Gln	0.855169	-0.225719	Neutral	1.10489	0.143899	Neutral	0.980028	-0.0291052	Neutral
96	p.Val96Pro	0.933618	-0.099096	Neutral	0.86801	-0.204217	Neutral	0.900814	-0.150699	Neutral
96	p.Val96Leu	0.873236	-0.195557	Neutral	1.21411	0.279904	Indeterminate	1.04367	0.0616723	Neutral
96	p.Val96Asp	0.817764	-0.290243	Neutral	1.25674	0.329687	Indeterminate	1.03725	0.0527674	Neutral
96	p.Val96Glu	0.645713	-0.631035	Neutral	1.05477	0.0769251	Neutral	0.85024	-0.234058	Neutral
96	p.Val96Ala	1.10247	0.140741	Neutral	1.53194	0.615361	Indeterminate	1.31721	0.397482	Indeterminate
96	p.Val96Gly	1.1314	0.178105	Neutral	0.856146	-0.224072	Neutral	0.993771	-0.00901407	Neutral
96	p.Val96Val	1	0	Neutral	1	0	Neutral	1	0	Neutral
96	p.Val96Tyr	0.823784	-0.279663	Neutral	1.07695	0.106945	Neutral	0.950364	-0.0734474	Neutral
96	p.Val96Cys	0.823566	-0.280044	Neutral	1.36663	0.450622	Indeterminate	1.0951	0.131059	Neutral
96	p.Val96Trp	0.700982	-0.512551	Neutral	1.45549	0.541506	Indeterminate	1.07824	0.108673	Neutral
96	p.Val96Phe	0.71882	-0.476297	Neutral	1.08099	0.112358	Neutral	0.899907	-0.152153	Neutral
97	p.Leu97Asn	7.42972	2.89331	Deleterious				7.42972	2.89331	Deleterious
97	p.Leu97Lys	8.27373	3.04854	Deleterious				8.27373	3.04854	Deleterious
97	p.Leu97Thr	5.89068	2.55844	Deleterious				5.89068	2.55844	Deleterious
97	p.Leu97Arg	8.52724	3.09208	Deleterious				8.52724	3.09208	Deleterious
97	p.Leu97Ser	7.64397	2.93432	Deleterious				7.64397	2.93432	Deleterious
97	p.Leu97Ile	0.846917	-0.239708	Neutral				0.846917	-0.239708	Neutral
97	p.Leu97Met	0.693335	-0.528375	Neutral				0.693335	-0.528375	Neutral
97	p.Leu97His	6.20311	2.63299	Deleterious				6.20311	2.63299	Deleterious
97	p.Leu97Gln	4.18987	2.0669	Deleterious				4.18987	2.0669	Deleterious
97	p.Leu97Pro	8.72404	3.125	Deleterious				8.72404	3.125	Deleterious
97	p.Leu97Leu	1	0	Neutral				1	0	Neutral
97	p.Leu97Asp	8.7401	3.12765	Deleterious				8.7401	3.12765	Deleterious
97	p.Leu97Glu	6.80513	2.76662	Deleterious				6.80513	2.76662	Deleterious
97	p.Leu97Ala	4.79332	2.26103	Deleterious				4.79332	2.26103	Deleterious
97	p.Leu97Gly	8.76158	3.13119	Deleterious				8.76158	3.13119	Deleterious
97	p.Leu97Val	1.68147	0.749724	Indeterminate				1.68147	0.749724	Indeterminate
97	p.Leu97Tyr	1.01042	0.0149521	Neutral				1.01042	0.0149521	Neutral
97	p.Leu97Cys	1.02881	0.0409737	Neutral				1.02881	0.0409737	Neutral
97	p.Leu97Trp	6.71521	2.74743	Deleterious				6.71521	2.74743	Deleterious
97	p.Leu97Phe	0.922789	-0.115928	Neutral				0.922789	-0.115928	Neutral
98	p.His98Asn	1.01622	0.0232107	Neutral				1.01622	0.0232107	Neutral
98	p.His98Lys	0.917075	-0.124888	Neutral				0.917075	-0.124888	Neutral
98	p.His98Thr	1.06944	0.0968603	Neutral				1.06944	0.0968603	Neutral
98	p.His98Arg	0.999524	-0.000686618	Neutral				0.999524	-0.000686618	Neutral
98	p.His98Ser	1.28888	0.366118	Indeterminate				1.28888	0.366118	Indeterminate
98	p.His98Ile	0.976577	-0.0341947	Neutral				0.976577	-0.0341947	Neutral
98	p.His98Met	0.969481	-0.0447152	Neutral				0.969481	-0.0447152	Neutral
98	p.His98His	1	0	Neutral				1	0	Neutral
98	p.His98Gln	1.19286	0.254427	Indeterminate				1.19286	0.254427	Indeterminate
98	p.His98Pro	5.38596	2.4292	Deleterious				5.38596	2.4292	Deleterious
98	p.His98Leu	1.15443	0.207185	Neutral				1.15443	0.207185	Neutral
98	p.His98Asp	1.26158	0.33523	Indeterminate				1.26158	0.33523	Indeterminate
98	p.His98Glu	1.0433	0.0611497	Neutral				1.0433	0.0611497	Neutral
98	p.His98Ala	0.933677	-0.0990046	Neutral				0.933677	-0.0990046	Neutral
98	p.His98Gly	1.15725	0.210706	Neutral				1.15725	0.210706	Neutral
98	p.His98Val	1.07189	0.100154	Neutral				1.07189	0.100154	Neutral
98	p.His98Tyr	1.06994	0.0975285	Neutral				1.06994	0.0975285	Neutral
98	p.His98Cys	1.08988	0.124166	Neutral				1.08988	0.124166	Neutral
98	p.His98Trp	0.935299	-0.0965	Neutral				0.935299	-0.0965	Neutral
98	p.His98Phe	0.943679	-0.0836323	Neutral				0.943679	-0.0836323	Neutral
99	p.Arg99Asn	1.38941	0.474473	Indeterminate				1.38941	0.474473	Indeterminate
99	p.Arg99Lys	1.1988	0.261593	Indeterminate				1.1988	0.261593	Indeterminate
99	p.Arg99Thr	1.4646	0.550509	Indeterminate				1.4646	0.550509	Indeterminate
99	p.Arg99Arg	1	0	Neutral				1	0	Neutral
99	p.Arg99Ser	1.45649	0.542495	Indeterminate				1.45649	0.542495	Indeterminate
99	p.Arg99Ile	1.25505	0.327744	Indeterminate				1.25505	0.327744	Indeterminate
99	p.Arg99Met	1.5982	0.676452	Indeterminate				1.5982	0.676452	Indeterminate
99	p.Arg99His	0.937212	-0.0935533	Neutral				0.937212	-0.0935533	Neutral
99	p.Arg99Gln	0.92347	-0.114863	Neutral				0.92347	-0.114863	Neutral
99	p.Arg99Pro	38.436	5.26439	Deleterious				38.436	5.26439	Deleterious
99	p.Arg99Leu	1.71978	0.782228	Indeterminate				1.71978	0.782228	Indeterminate
99	p.Arg99Asp	1.92235	0.942872	Indeterminate				1.92235	0.942872	Indeterminate
99	p.Arg99Glu	1.39597	0.481265	Indeterminate				1.39597	0.481265	Indeterminate
99	p.Arg99Ala	2.31415	1.21048	Deleterious				2.31415	1.21048	Deleterious
99	p.Arg99Gly	1.02293	0.032711	Neutral				1.02293	0.032711	Neutral
99	p.Arg99Val	2.26913	1.18214	Deleterious				2.26913	1.18214	Deleterious
99	p.Arg99Tyr	1.06133	0.0858717	Neutral				1.06133	0.0858717	Neutral
99	p.Arg99Cys	1.76879	0.822764	Indeterminate				1.76879	0.822764	Indeterminate
99	p.Arg99Trp	1.83068	0.872377	Indeterminate				1.83068	0.872377	Indeterminate
99	p.Arg99Phe	1.14098	0.190273	Neutral				1.14098	0.190273	Neutral
100	p.Ala100Asn	1.09663	0.133082	Neutral				1.09663	0.133082	Neutral
100	p.Ala100Lys	0.941999	-0.086202	Neutral				0.941999	-0.086202	Neutral
100	p.Ala100Thr	1.33673	0.418713	Indeterminate				1.33673	0.418713	Indeterminate
100	p.Ala100Arg	0.920397	-0.119672	Neutral				0.920397	-0.119672	Neutral
100	p.Ala100Ser	0.737273	-0.43973	Neutral				0.737273	-0.43973	Neutral
100	p.Ala100Ile	1.04584	0.0646662	Neutral				1.04584	0.0646662	Neutral
100	p.Ala100Met	1.30101	0.379627	Indeterminate				1.30101	0.379627	Indeterminate
100	p.Ala100His	0.785977	-0.347441	Neutral				0.785977	-0.347441	Neutral
100	p.Ala100Gln	1.0187	0.026731	Neutral				1.0187	0.026731	Neutral
100	p.Ala100Pro	13.5253	3.75759	Deleterious				13.5253	3.75759	Deleterious
100	p.Ala100Leu	0.872813	-0.196256	Neutral				0.872813	-0.196256	Neutral
100	p.Ala100Asp	0.732687	-0.448731	Neutral				0.732687	-0.448731	Neutral
100	p.Ala100Glu	1.7472	0.805042	Indeterminate				1.7472	0.805042	Indeterminate
100	p.Ala100Ala	1	0	Neutral				1	0	Neutral
100	p.Ala100Gly	3.87501	1.9542	Deleterious				3.87501	1.9542	Deleterious
100	p.Ala100Val	0.817447	-0.290803	Neutral				0.817447	-0.290803	Neutral
100	p.Ala100Tyr	1.1644	0.219589	Neutral				1.1644	0.219589	Neutral
100	p.Ala100Cys	0.641761	-0.639891	Neutral				0.641761	-0.639891	Neutral
[truncated: 1,122 more rows]
