# Supplementary material for: Functional characterization of all CDKN2A missense variants and comparison to in silico models of pathogenicity
Source: eLife. 2025 Apr 16;13:RP95347. doi: 10.7554/eLife.95347 (PMC12002794; doi:10.7554/eLife.95347)
Supplement: Supplementary file 7. [file elife-95347-supp7.xlsx]

## Sheet: Appendix 1-table 7
Supplementary File 7. In silico variant effect predictions for CDKN2A missense variants.
Protein Consequence	ACMG Guidline Classification	This study		AlphaMisssense		ESM1b		VEST		Polyphen-2		SIFT		CADD
		Log P value	Characteritic	Score	Prediction	Score	Prediction	Score	Prediction	Score	Prediction	Score	Prediction	Score	Prediction
p.Met1Asn	VUS	-0.153162	Neutral	0.3395	Benign	-11.015	Pathogenic	0.436	Neutral	0.187	Benign	0	Deleterious
p.Met1Lys	VUS	-0.0081691	Neutral	0.1809	Benign	-10.147	Pathogenic	0.483	Neutral	0.035	Benign	0	Deleterious	14.26	Neutral
p.Met1Thr	VUS	-0.136213	Neutral	0.1089	Benign	-8.46	Pathogenic	0.434	Neutral	0.002	Benign	0	Deleterious	12.5	Neutral
p.Met1Arg	VUS	-0.217716	Neutral	0.1016	Benign	-8.483	Pathogenic	0.565	Disease	0	Benign	0	Deleterious	14.15	Neutral
p.Met1Ser	VUS	-0.00932415	Neutral	0.1466	Benign	-7.858	Pathogenic	0.426	Neutral	0.045	Benign	0	Deleterious
p.Met1Ile	VUS	-0.43845	Neutral	0.2189	Benign	-10.399	Pathogenic	0.358	Neutral	0.148	Benign	0	Deleterious	18.53	Deleterious
p.Met1His	VUS	-1.27452	Neutral	0.2154	Benign	-10.631	Pathogenic	0.414	Neutral	0.621	Possibly damaging	0	Deleterious
p.Met1Gln	VUS	-0.124207	Neutral	0.0671	Benign	-9.155	Pathogenic	0.403	Neutral	0.104	Benign	0	Deleterious
p.Met1Pro	VUS	-0.362427	Neutral	0.2182	Benign	-7.529	Pathogenic	0.439	Neutral	0.319	Benign	0	Deleterious
p.Met1Leu	VUS	-0.0189802	Neutral	0.1145	Benign	-8.179	Pathogenic	0.345	Neutral	0.03	Benign	0	Deleterious	16.05	Deleterious
p.Met1Asp	VUS	-0.00297522	Neutral	0.3313	Benign	-9.417	Pathogenic	0.432	Neutral	0.045	Benign	0	Deleterious
p.Met1Glu	VUS	-0.957436	Neutral	0.1789	Benign	-8.424	Pathogenic	0.464	Neutral	0	Benign	0	Deleterious
p.Met1Ala	VUS	-0.0729548	Neutral	0.0832	Benign	-7.472	Benign	0.386	Neutral	0.02	Benign	0	Deleterious
p.Met1Gly	VUS	-0.355291	Neutral	0.1639	Benign	-7.925	Pathogenic	0.436	Neutral	0	Benign	0	Deleterious
p.Met1Val	VUS	-4.15828	Neutral	0.0676	Benign	-8.255	Pathogenic	0.302	Neutral	0.035	Benign	0	Deleterious	15.11	Deleterious
p.Met1Tyr	VUS	-0.0170434	Neutral	0.3089	Benign	-11.505	Pathogenic	0.37	Neutral	0.833	Possibly damaging	0	Deleterious
p.Met1Cys	VUS	-0.00688575	Neutral	0.1441	Benign	-10.284	Pathogenic	0.408	Neutral	0.95	Possibly damaging	0	Deleterious
p.Met1Trp	VUS	-1.15442	Neutral	0.1938	Benign	-10.346	Pathogenic	0.369	Neutral	0.95	Possibly damaging	0	Deleterious
p.Met1Phe	VUS	-0.26512	Neutral	0.123	Benign	-10.788	Pathogenic	0.343	Neutral	0.833	Possibly damaging	0	Deleterious
p.Glu2Asn	VUS	0	Neutral	0.1628	Benign	-6.38	Benign	0.251	Neutral	0.206	Benign	0	Deleterious
p.Glu2Lys	VUS	-2.54333e-06	Neutral	0.178	Benign	-6.277	Benign	0.219	Neutral	0.075	Benign	0	Deleterious	18.01	Deleterious
p.Glu2Thr	VUS	-6.20528e-05	Neutral	0.1353	Benign	-5.223	Benign	0.259	Neutral	0.342	Benign	0	Deleterious
p.Glu2Arg	VUS	0	Neutral	0.1392	Benign	-5.172	Benign	0.287	Neutral	0.001	Benign	0	Deleterious
p.Glu2Ser	VUS	-0.134278	Neutral	0.1083	Benign	-4.3	Benign	0.299	Neutral	0.342	Benign	0	Deleterious
p.Glu2Ile	VUS	0	Neutral	0.2491	Benign	-7.329	Benign	0.331	Neutral	0.645	Possibly damaging	0	Deleterious
p.Glu2Met	VUS	-0.0076299	Neutral	0.361	Ambiguous	-7.239	Benign	0.33	Neutral	0.933	Possibly damaging	0	Deleterious
p.Glu2His	VUS	-1.04827e-06	Neutral	0.1838	Benign	-6.395	Benign	0.279	Neutral	0.645	Possibly damaging	0	Deleterious
p.Glu2Gln	VUS	0	Neutral	0.0927	Benign	-5.391	Benign	0.172	Neutral	0.005	Benign	0	Deleterious	12.97	Neutral
p.Glu2Pro	VUS	-9.42766e-10	Neutral	0.12	Benign	-4.118	Benign	0.315	Neutral	0.787	Possibly damaging	0	Deleterious
p.Glu2Leu	VUS	0	Neutral	0.196	Benign	-5.403	Benign	0.323	Neutral	0.206	Benign	0	Deleterious
p.Glu2Asp	VUS	0	Neutral	0.0961	Benign	-4.347	Benign	0.173	Neutral	0.001	Benign	0	Deleterious	13.41	Neutral
p.Glu2Ala	VUS	-0.0190685	Neutral	0.0883	Benign	-3.296	Benign	0.185	Neutral	0.164	Benign	0	Deleterious	18.03	Deleterious
p.Glu2Gly	VUS	-1.15932e-06	Neutral	0.104	Benign	-4.455	Benign	0.24	Neutral	0.281	Benign	0	Deleterious	20.5	Deleterious
p.Glu2Val	VUS	0	Neutral	0.183	Benign	-5.703	Benign	0.206	Neutral	0.578	Possibly damaging	0	Deleterious	19.22	Deleterious
p.Glu2Tyr	VUS	-1.7791e-07	Neutral	0.293	Benign	-7.993	Pathogenic	0.316	Neutral	0.004	Benign	0	Deleterious
p.Glu2Cys	VUS	-0.0474457	Neutral	0.5741	Pathogenic	-6.916	Benign	0.338	Neutral	0.977	Probably damaging	0	Deleterious
p.Glu2Trp	VUS	-1.49008e-05	Neutral	0.5562	Ambiguous	-7.466	Benign	0.351	Neutral	0.933	Possibly damaging	0	Deleterious
p.Glu2Phe	VUS	-2.30548e-07	Neutral	0.3325	Benign	-7.073	Benign	0.344	Neutral	0.477	Possibly damaging	0	Deleterious
p.Pro3Asn	VUS	-7.64279	Indeterminate	0.1549	Benign	-6.324	Benign	0.277	Neutral	0.053	Benign	0	Deleterious
p.Pro3Lys	VUS	-18.3908	Indeterminate	0.1394	Benign	-6.263	Benign	0.237	Neutral	0.012	Benign	0	Deleterious
p.Pro3Thr	VUS	-10.8027	Indeterminate	0.0566	Benign	-4.431	Benign	0.182	Neutral	0.021	Benign	0	Deleterious	12.72	Neutral
p.Pro3Arg	VUS	-33.2078	Indeterminate	0.0808	Benign	-4.806	Benign	0.213	Neutral	0	Benign	0	Deleterious	0.003	Neutral
p.Pro3Ser	VUS	-22.5421	Indeterminate	0.0718	Benign	-3.829	Benign	0.161	Neutral	0	Benign	0	Deleterious	12.92	Neutral
p.Pro3Ile	VUS	-11.2729	Indeterminate	0.1733	Benign	-6.971	Benign	0.247	Neutral	0.027	Benign	0	Deleterious
p.Pro3Met	VUS	-23.5368	Indeterminate	0.2138	Benign	-6.54	Benign	0.244	Neutral	0.321	Benign	0	Deleterious
p.Pro3His	VUS	-5.10522	Neutral	0.1115	Benign	-6.201	Benign	0.18	Neutral	0	Benign	0	Deleterious
p.Pro3Gln	VUS	-0.277201	Neutral	0.0843	Benign	-5.604	Benign	0.247	Neutral	0.003	Benign	0	Deleterious	0.008	Neutral
p.Pro3Leu	VUS	-15.0229	Indeterminate	0.1102	Benign	-5.31	Benign	0.144	Neutral	0	Benign	0	Deleterious	0.022	Neutral
p.Pro3Asp	VUS	-14.4442	Indeterminate	0.1213	Benign	-4.219	Benign	0.26	Neutral	0.053	Benign	0	Deleterious
p.Pro3Glu	VUS	-4.69786	Neutral	0.0843	Benign	-3.979	Benign	0.276	Neutral	0.012	Benign	0	Deleterious
p.Pro3Ala	VUS	-3.70166	Neutral	0.0433	Benign	-2.613	Benign	0.213	Neutral	0.009	Benign	0	Deleterious	10.5	Neutral
p.Pro3Gly	VUS	-53.1508	Deleterious	0.099	Benign	-3.736	Benign	0.246	Neutral	0.027	Benign	0	Deleterious
p.Pro3Val	VUS	-14.3405	Indeterminate	0.1025	Benign	-5.048	Benign	0.24	Neutral	0.027	Benign	0	Deleterious
p.Pro3Tyr	VUS	-5.47143	Neutral	0.2469	Benign	-7.972	Pathogenic	0.26	Neutral	0	Benign	0	Deleterious
p.Pro3Cys	VUS	-11.3156	Indeterminate	0.3323	Benign	-6.705	Benign	0.251	Neutral	0.745	Possibly damaging	0	Deleterious
p.Pro3Trp	VUS	-31.7904	Indeterminate	0.3207	Benign	-7.793	Pathogenic	0.267	Neutral	0.49	Possibly damaging	0	Deleterious
p.Pro3Phe	VUS	-12.5831	Indeterminate	0.2465	Benign	-7.363	Benign	0.259	Neutral	0.063	Benign	0	Deleterious
p.Ala4Asn	VUS	-5.7084	Neutral	0.1953	Benign	-5.539	Benign	0.244	Neutral	0.187	Benign	0.05	Deleterious
p.Ala4Lys	VUS	-1.30657	Neutral	0.2156	Benign	-6.173	Benign	0.259	Neutral	0.187	Benign	0.07	Tolerated
p.Ala4Thr	VUS	-33.2193	Indeterminate	0.0868	Benign	-4.686	Benign	0.198	Neutral	0.148	Benign	0.11	Tolerated	15.19	Deleterious
p.Ala4Arg	VUS	-1.41365	Neutral	0.1387	Benign	-4.545	Benign	0.261	Neutral	0.447	Benign	0.05	Deleterious
p.Ala4Ser	VUS	-53.1508	Deleterious	0.0877	Benign	-2.946	Benign	0.187	Neutral	0.067	Benign	0.5	Tolerated	10.21	Neutral
p.Ala4Ile	VUS	-0.179384	Neutral	0.2182	Benign	-6.316	Benign	0.238	Neutral	0.104	Benign	0.03	Deleterious
p.Ala4Met	VUS	-7.81165	Indeterminate	0.2462	Benign	-6.25	Benign	0.233	Neutral	0.621	Possibly damaging	0.02	Deleterious
p.Ala4His	VUS	-1.30832	Neutral	0.2007	Benign	-6.226	Benign	0.244	Neutral	0.833	Possibly damaging	0.02	Deleterious
p.Ala4Gln	VUS	-0.321119	Neutral	0.1443	Benign	-5.702	Benign	0.24	Neutral	0.447	Benign	0.05	Deleterious
p.Ala4Pro	VUS	-0.633092	Neutral	0.0782	Benign	-3.988	Benign	0.234	Neutral	0.79	Possibly damaging	0.07	Tolerated	15.45	Deleterious
p.Ala4Leu	VUS	-0.913963	Neutral	0.1371	Benign	-4.801	Benign	0.266	Neutral	0.045	Benign	0.04	Deleterious
p.Ala4Asp	VUS	-3.19665	Neutral	0.1049	Benign	-4.739	Benign	0.228	Neutral	0.104	Benign	0.06	Tolerated
p.Ala4Glu	VUS	-0.0189242	Neutral	0.0959	Benign	-4.536	Benign	0.212	Neutral	0.006	Benign	0.08	Tolerated	12.91	Neutral
p.Ala4Gly	VUS	-6.57652	Indeterminate	0.084	Benign	-3.581	Benign	0.209	Neutral	0	Benign	0.13	Tolerated	14.74	Neutral
p.Ala4Val	VUS	-0.112064	Neutral	0.1119	Benign	-4.861	Benign	0.133	Neutral	0.003	Benign	0.06	Tolerated	14	Neutral
p.Ala4Tyr	VUS	-0.6716	Neutral	0.2706	Benign	-7.037	Benign	0.269	Neutral	0.447	Benign	0.02	Deleterious
p.Ala4Cys	VUS	-32.2554	Indeterminate	0.2917	Benign	-5.689	Benign	0.245	Neutral	0.95	Possibly damaging	0.02	Deleterious
p.Ala4Trp	VUS	-2.0165	Neutral	0.3314	Benign	-7.025	Benign	0.231	Neutral	0.002	Benign	0.01	Deleterious
p.Ala4Phe	VUS	-8.96267	Indeterminate	0.2028	Benign	-6.433	Benign	0.245	Neutral	0.447	Benign	0.02	Deleterious
p.Ala5Asn	VUS	-0.0101671	Neutral	0.1921	Benign	-5.781	Benign	0.267	Neutral	0.477	Possibly damaging	0.06	Tolerated
p.Ala5Lys	VUS	-1.30707e-08	Neutral	0.2139	Benign	-5.653	Benign	0.272	Neutral	0.206	Benign	0.07	Tolerated
p.Ala5Thr	VUS	-0.767901	Neutral	0.0888	Benign	-4.084	Benign	0.173	Neutral	0.281	Benign	0.08	Tolerated	9.465	Neutral
p.Ala5Arg	VUS	-0.000335369	Neutral	0.1335	Benign	-4.423	Benign	0.292	Neutral	0.645	Possibly damaging	0.05	Deleterious
p.Ala5Ser	VUS	-33.2191	Indeterminate	0.0846	Benign	-3.795	Benign	0.18	Neutral	0.015	Benign	0.19	Tolerated	6.321	Neutral
p.Ala5Ile	VUS	0	Neutral	0.2217	Benign	-6.066	Benign	0.277	Neutral	0.206	Benign	0.02	Deleterious
p.Ala5Met	VUS	-0.269612	Neutral	0.2503	Benign	-4.192	Benign	0.285	Neutral	0.645	Possibly damaging	0.02	Deleterious
p.Ala5His	VUS	-0.660951	Neutral	0.1968	Benign	-6.301	Benign	0.275	Neutral	0.933	Possibly damaging	0.02	Deleterious
p.Ala5Gln	VUS	-0.829139	Neutral	0.1399	Benign	-5.76	Benign	0.27	Neutral	0.477	Possibly damaging	0.05	Deleterious
p.Ala5Pro	VUS	-0.0722544	Neutral	0.0743	Benign	-3.817	Benign	0.262	Neutral	0.736	Possibly damaging	0.09	Tolerated	9.872	Neutral
p.Ala5Leu	VUS	-9.2129	Indeterminate	0.1304	Benign	-4.305	Benign	0.277	Neutral	0.002	Benign	0.05	Deleterious
p.Ala5Asp	VUS	-1.62525	Neutral	0.109	Benign	-4.484	Benign	0.226	Neutral	0.002	Benign	0.06	Tolerated
p.Ala5Glu	VUS	-6.4829	Indeterminate	0.0985	Benign	-4.498	Benign	0.229	Neutral	0.003	Benign	0.08	Tolerated	7.815	Neutral
p.Ala5Gly	VUS	-0.223667	Neutral	0.0742	Benign	-3.844	Benign	0.208	Neutral	0.291	Benign	0.48	Tolerated	9.199	Neutral
p.Ala5Val	VUS	-0.0938781	Neutral	0.118	Benign	-4.341	Benign	0.197	Neutral	0.079	Benign	0.06	Tolerated	9.176	Neutral
p.Ala5Tyr	VUS	-53.1508	Deleterious	0.2687	Benign	-7.064	Benign	0.308	Neutral	0.787	Possibly damaging	0.02	Deleterious
p.Ala5Cys	VUS	-4.13793	Neutral	0.2884	Benign	-5.936	Benign	0.258	Neutral	0.977	Probably damaging	0.03	Deleterious
p.Ala5Trp	VUS	-25.5284	Indeterminate	0.2995	Benign	-6.629	Benign	0.322	Neutral	0.977	Probably damaging	0.01	Deleterious
p.Ala5Phe	VUS	-0.466113	Neutral	0.1924	Benign	-6.398	Benign	0.268	Neutral	0.645	Possibly damaging	0.02	Deleterious
p.Gly6Asn	VUS	-0.0928869	Neutral	0.1874	Benign	-6.085	Benign	0.225	Neutral	0.999	Probably damaging	0	Deleterious
p.Gly6Lys	VUS	-2.24828	Neutral	0.2558	Benign	-5.938	Benign	0.232	Neutral	0.999	Probably damaging	0	Deleterious
p.Gly6Thr	VUS	-4.21789	Neutral	0.0844	Benign	-4.52	Benign	0.253	Neutral	0.999	Probably damaging	0	Deleterious
p.Gly6Arg	VUS	-53.1508	Deleterious	0.1565	Benign	-4.418	Benign	0.142	Neutral	0.999	Probably damaging	0	Deleterious	14.96	Neutral
p.Gly6Ser	VUS	-33.2193	Indeterminate	0.0929	Benign	-3.212	Benign	0.178	Neutral	0.999	Probably damaging	0	Deleterious
p.Gly6Ile	VUS	-53.1508	Deleterious	0.1621	Benign	-6.379	Benign	0.219	Neutral	1	Probably damaging	0	Deleterious
p.Gly6Met	VUS	-33.2044	Indeterminate	0.2989	Benign	-6.24	Benign	0.214	Neutral	1	Probably damaging	0	Deleterious
p.Gly6His	VUS	-0.00449888	Neutral	0.1886	Benign	-6.098	Benign	0.241	Neutral	1	Probably damaging	0	Deleterious
p.Gly6Gln	VUS	-0.081732	Neutral	0.1728	Benign	-5.437	Benign	0.253	Neutral	1	Probably damaging	0	Deleterious
p.Gly6Pro	VUS	-20.274	Indeterminate	0.1406	Benign	-3.478	Benign	0.254	Neutral	0.999	Probably damaging	0	Deleterious
p.Gly6Leu	VUS	-0.871824	Neutral	0.1854	Benign	-4.696	Benign	0.21	Neutral	0.999	Probably damaging	0	Deleterious
p.Gly6Asp	VUS	-0.530546	Neutral	0.0916	Benign	-3.837	Benign	0.162	Neutral	0.999	Probably damaging	0	Deleterious
p.Gly6Glu	VUS	-0.722487	Neutral	0.0925	Benign	-3.511	Benign	0.128	Neutral	0.999	Probably damaging	0	Deleterious	6.13	Neutral
p.Gly6Ala	VUS	-0.201416	Neutral	0.0683	Benign	-3.051	Benign	0.106	Neutral	0.996	Probably damaging	0	Deleterious	0.096	Neutral
p.Gly6Val	VUS	-0.0481888	Neutral	0.0979	Benign	-4.634	Benign	0.136	Neutral	0.999	Probably damaging	0	Deleterious	7.892	Neutral
p.Gly6Tyr	VUS	-0.769399	Neutral	0.238	Benign	-7.142	Benign	0.225	Neutral	1	Probably damaging	0	Deleterious
p.Gly6Cys	VUS	-13.2334	Indeterminate	0.1453	Benign	-5.879	Benign	0.184	Neutral	1	Probably damaging	0	Deleterious
p.Gly6Trp	VUS	-3.24294	Neutral	0.1807	Benign	-6.334	Benign	0.205	Neutral	1	Probably damaging	0	Deleterious	20.5	Deleterious
p.Gly6Phe	VUS	-5.31449	Neutral	0.2711	Benign	-6.216	Benign	0.213	Neutral	1	Probably damaging	0	Deleterious
p.Ser7Asn	VUS	-0.0701176	Neutral	0.1609	Benign	-6.236	Benign	0.155	Neutral	0.909	Possibly damaging	0.41	Tolerated	10.26	Neutral
p.Ser7Lys	VUS	-0.181096	Neutral	0.3066	Benign	-6.644	Benign	0.273	Neutral	0.93	Possibly damaging	0.31	Tolerated
p.Ser7Thr	VUS	-11.2009	Indeterminate	0.0885	Benign	-4.377	Benign	0.189	Neutral	0.805	Possibly damaging	0.38	Tolerated	10.06	Neutral
p.Ser7Arg	VUS	-0.031303	Neutral	0.1935	Benign	-4.146	Benign	0.159	Neutral	0.972	Probably damaging	0.19	Tolerated	11.49	Neutral
p.Ser7Ile	VUS	-1.33147	Neutral	0.1573	Benign	-6.226	Benign	0.249	Neutral	0.972	Probably damaging	0.09	Tolerated	15.55	Deleterious
p.Ser7Met	VUS	-0.711968	Neutral	0.2546	Benign	-6.718	Benign	0.299	Neutral	0.979	Probably damaging	0.06	Tolerated
p.Ser7His	VUS	-3.32077	Neutral	0.1477	Benign	-5.854	Benign	0.282	Neutral	0.979	Probably damaging	0.1	Tolerated
p.Ser7Gln	VUS	-0.381866	Neutral	0.1953	Benign	-5.54	Benign	0.251	Neutral	0.979	Probably damaging	0.2	Tolerated
p.Ser7Pro	VUS	-0.714893	Neutral	0.0805	Benign	-2.238	Benign	0.219	Neutral	0.93	Possibly damaging	0.25	Tolerated
p.Ser7Leu	VUS	-8.56509	Indeterminate	0.1512	Benign	-4.346	Benign	0.245	Neutral	0.93	Possibly damaging	0.15	Tolerated
p.Ser7Asp	VUS	-0.961352	Neutral	0.1532	Benign	-4.7	Benign	0.244	Neutral	0.93	Possibly damaging	0.39	Tolerated
p.Ser7Glu	VUS	-29.4334	Indeterminate	0.1614	Benign	-4.81	Benign	0.25	Neutral	0.93	Possibly damaging	0.31	Tolerated
p.Ser7Ala	VUS	-19.5075	Indeterminate	0.0736	Benign	-3.254	Benign	0.202	Neutral	0.705	Possibly damaging	0.82	Tolerated
p.Ser7Gly	VUS	-0.015514	Neutral	0.0749	Benign	-3.274	Benign	0.161	Neutral	0.805	Possibly damaging	0.72	Tolerated	9.065	Neutral
p.Ser7Val	VUS	-4.25173	Neutral	0.146	Benign	-4.902	Benign	0.306	Neutral	0.93	Possibly damaging	0.18	Tolerated
p.Ser7Tyr	VUS	-33.1923	Indeterminate	0.1359	Benign	-7.301	Benign	0.245	Neutral	0.979	Probably damaging	0.09	Tolerated
p.Ser7Cys	VUS	-3.13666	Neutral	0.1065	Benign	-5.605	Benign	0.234	Neutral	0.992	Probably damaging	0.09	Tolerated	13.9	Neutral
p.Ser7Trp	VUS	-6.59517	Indeterminate	0.1379	Benign	-6.504	Benign	0.316	Neutral	0.994	Probably damaging	0.02	Deleterious
p.Ser7Phe	VUS	-1.34949	Neutral	0.1466	Benign	-6.301	Benign	0.273	Neutral	0.979	Probably damaging	0.07	Tolerated
p.Ser8Asn	VUS	-0.00102609	Neutral	0.1869	Benign	-5.649	Benign	0.146	Neutral	0.909	Possibly damaging	0	Deleterious	11.2	Neutral
p.Ser8Lys	VUS	-21.114	Indeterminate	0.3458	Ambiguous	-6.105	Benign	0.261	Neutral	0.93	Possibly damaging	0	Deleterious
p.Ser8Thr	VUS	-0.541212	Neutral	0.0885	Benign	-4.192	Benign	0.152	Neutral	0.805	Possibly damaging	0	Deleterious	9.913	Neutral
p.Ser8Arg	VUS	-0.0381298	Neutral	0.2024	Benign	-4.187	Benign	0.21	Neutral	0.972	Probably damaging	0	Deleterious	13.4567	Neutral
p.Ser8Ile	VUS	-0.0122242	Neutral	0.2006	Benign	-5.854	Benign	0.211	Neutral	0.972	Probably damaging	0	Deleterious	19.43	Deleterious
p.Ser8Met	VUS	-0.00532519	Neutral	0.2931	Benign	-6.033	Benign	0.282	Neutral	0.979	Probably damaging	0	Deleterious
p.Ser8His	VUS	-0.0108545	Neutral	0.1768	Benign	-6.03	Benign	0.275	Neutral	0.979	Probably damaging	0	Deleterious
p.Ser8Gln	VUS	-0.0156015	Neutral	0.2185	Benign	-5.468	Benign	0.261	Neutral	0.979	Probably damaging	0	Deleterious
p.Ser8Pro	VUS	-0.803325	Neutral	0.0781	Benign	-3.549	Benign	0.195	Neutral	0.93	Possibly damaging	0	Deleterious
p.Ser8Leu	VUS	-0.430869	Neutral	0.1695	Benign	-4.582	Benign	0.231	Neutral	0.93	Possibly damaging	0	Deleterious
p.Ser8Asp	VUS	-0.0327619	Neutral	0.1824	Benign	-4.383	Benign	0.26	Neutral	0.93	Possibly damaging	0	Deleterious
p.Ser8Glu	VUS	-6.17318e-06	Neutral	0.1836	Benign	-4.184	Benign	0.26	Neutral	0.93	Possibly damaging	0	Deleterious
p.Ser8Ala	VUS	-0.0927807	Neutral	0.067	Benign	-2.851	Benign	0.175	Neutral	0.705	Possibly damaging	0	Deleterious
p.Ser8Gly	VUS	-0.420653	Neutral	0.0742	Benign	-3.03	Benign	0.157	Neutral	0.805	Possibly damaging	0	Deleterious	11.53	Neutral
p.Ser8Val	VUS	-0.0292478	Neutral	0.1515	Benign	-4.453	Benign	0.272	Neutral	0.93	Possibly damaging	0	Deleterious
p.Ser8Tyr	VUS	-0.0092971	Neutral	0.1785	Benign	-6.894	Benign	0.251	Neutral	0.979	Probably damaging	0	Deleterious
p.Ser8Cys	VUS	-0.000261652	Neutral	0.1205	Benign	-5.767	Benign	0.218	Neutral	0.992	Probably damaging	0	Deleterious	19.53	Deleterious
p.Ser8Trp	VUS	-0.00136633	Neutral	0.1728	Benign	-5.935	Benign	0.316	Neutral	0.994	Probably damaging	0	Deleterious
p.Ser8Phe	VUS	-0.225006	Neutral	0.1813	Benign	-6.248	Benign	0.24	Neutral	0.979	Probably damaging	0	Deleterious
p.Met9Asn	VUS	-0.21139	Neutral	0.2827	Benign	-4.021	Benign	0.329	Neutral	0.127	Benign	0.49	Tolerated
p.Met9Lys	VUS	-0.227138	Neutral	0.1265	Benign	-3.567	Benign	0.346	Neutral	0.043	Benign	0.52	Tolerated	10.96	Neutral
p.Met9Thr	VUS	-0.271973	Neutral	0.1106	Benign	-1.571	Benign	0.166	Neutral	0	Benign	0.51	Tolerated	9.038	Neutral
p.Met9Arg	VUS	-0.0740179	Neutral	0.0796	Benign	-1.774	Benign	0.333	Neutral	0.099	Benign	0.31	Tolerated	11.88	Neutral
p.Met9Ser	VUS	-1.02459	Neutral	0.1354	Benign	-1.003	Benign	0.334	Neutral	0.013	Benign	0.6	Tolerated
p.Met9Ile	VUS	-0.288455	Neutral	0.3311	Benign	-3.663	Benign	0.266	Neutral	0.043	Benign	0.36	Tolerated	14.95	Neutral
p.Met9His	VUS	-0.704535	Neutral	0.1895	Benign	-3.537	Benign	0.332	Neutral	0.759	Possibly damaging	0.21	Tolerated
p.Met9Gln	VUS	-0.371005	Neutral	0.0834	Benign	-2.676	Benign	0.304	Neutral	0.228	Benign	0.42	Tolerated
p.Met9Pro	VUS	-0.627337	Neutral	0.1203	Benign	-0.649	Benign	0.348	Neutral	0.228	Benign	0.28	Tolerated
p.Met9Leu	VUS	-0.0113556	Neutral	0.1231	Benign	-1.653	Benign	0.209	Neutral	0.004	Benign	0.68	Tolerated	6.18	Neutral
p.Met9Asp	VUS	-0.132766	Neutral	0.2062	Benign	-2.236	Benign	0.327	Neutral	0.127	Benign	0.77	Tolerated
p.Met9Glu	VUS	-0.0480903	Neutral	0.1168	Benign	-1.929	Benign	0.351	Neutral	0.057	Benign	1	Tolerated
p.Met9Ala	VUS	-0.118714	Neutral	0.1092	Benign	-0.636	Benign	0.319	Neutral	0.013	Benign	0.68	Tolerated
p.Met9Gly	VUS	-0.352363	Neutral	0.1028	Benign	-1.138	Benign	0.282	Neutral	0.057	Benign	0.44	Tolerated
p.Met9Val	VUS	-0.457554	Neutral	0.0729	Benign	-2.108	Benign	0.217	Neutral	0.004	Benign	0.43	Tolerated	9.637	Neutral
p.Met9Tyr	VUS	-0.0200581	Neutral	0.3135	Benign	-4.703	Benign	0.335	Neutral	0.473	Possibly damaging	0.24	Tolerated
p.Met9Cys	VUS	-0.127272	Neutral	0.3048	Benign	-3.716	Benign	0.343	Neutral	0.759	Possibly damaging	0.09	Tolerated
p.Met9Trp	VUS	-0.131926	Neutral	0.2459	Benign	-3.881	Benign	0.365	Neutral	0.759	Possibly damaging	0.06	Tolerated
p.Met9Phe	VUS	-0.234834	Neutral	0.1726	Benign	-4.085	Benign	0.327	Neutral	0.228	Benign	0.24	Tolerated
p.Glu10Asn	VUS	-2.65169	Neutral	0.3289	Benign	-6.096	Benign	0.297	Neutral	0.259	Benign	0	Deleterious
p.Glu10Lys	VUS	-33.214	Indeterminate	0.256	Benign	-5.895	Benign	0.251	Neutral	0.345	Benign	0	Deleterious	13.32	Neutral
p.Glu10Thr	VUS	-5.04252	Neutral	0.223	Benign	-4.773	Benign	0.304	Neutral	0.586	Possibly damaging	0	Deleterious
p.Glu10Arg	VUS	-0.851577	Neutral	0.1991	Benign	-4.48	Benign	0.251	Neutral	0.832	Possibly damaging	0	Deleterious
p.Glu10Ser	VUS	-22.0185	Indeterminate	0.2081	Benign	-4.039	Benign	0.305	Neutral	0.411	Benign	0	Deleterious
p.Glu10Ile	VUS	-13.0107	Indeterminate	0.3779	Ambiguous	-6.665	Benign	0.329	Neutral	0.938	Possibly damaging	0	Deleterious
p.Glu10Met	VUS	-9.11935	Indeterminate	0.5022	Ambiguous	-6.58	Benign	0.357	Neutral	0.983	Probably damaging	0	Deleterious
p.Glu10His	VUS	-32.2133	Indeterminate	0.3061	Benign	-5.891	Benign	0.313	Neutral	0.938	Possibly damaging	0	Deleterious
p.Glu10Gln	VUS	-0.36833	Neutral	0.1183	Benign	-5.008	Benign	0.215	Neutral	0.516	Possibly damaging	0	Deleterious	11.32	Neutral
p.Glu10Pro	VUS	-0.825205	Neutral	0.2004	Benign	-3.49	Benign	0.351	Neutral	0.938	Possibly damaging	0	Deleterious
p.Glu10Leu	VUS	-5.49066	Neutral	0.2964	Benign	-4.453	Benign	0.3	Neutral	0.832	Possibly damaging	0	Deleterious
p.Glu10Asp	VUS	-2.11752	Neutral	0.1568	Benign	-3.819	Benign	0.137	Neutral	0.001	Benign	0	Deleterious	3.76	Neutral
p.Glu10Ala	VUS	-32.8084	Indeterminate	0.1213	Benign	-3.214	Benign	0.229	Neutral	0.345	Benign	0	Deleterious	11.44	Neutral
p.Glu10Gly	VUS	-1.38055	Neutral	0.1484	Benign	-2.922	Benign	0.21	Neutral	0.345	Benign	0	Deleterious	13.55	Neutral
p.Glu10Val	VUS	-1.13293	Neutral	0.2187	Benign	-4.693	Benign	0.262	Neutral	0.789	Possibly damaging	0	Deleterious	12.78	Neutral
p.Glu10Tyr	VUS	-2.55884	Neutral	0.4542	Ambiguous	-6.988	Benign	0.32	Neutral	0.938	Possibly damaging	0	Deleterious
p.Glu10Cys	VUS	-1.13063	Neutral	0.772	Pathogenic	-6.293	Benign	0.342	Neutral	0.983	Probably damaging	0	Deleterious
p.Glu10Trp	VUS	-1.25365	Neutral	0.7614	Pathogenic	-6.628	Benign	0.363	Neutral	0.983	Probably damaging	0	Deleterious
p.Glu10Phe	VUS	-2.6539	Neutral	0.527	Ambiguous	-6.369	Benign	0.333	Neutral	0.938	Possibly damaging	0	Deleterious
p.Pro11Asn	VUS	-1.31891	Neutral	0.3178	Benign	-6.469	Benign	0.274	Neutral	0.016	Benign	0.04	Deleterious
p.Pro11Lys	VUS	-4.62946	Neutral	0.2775	Benign	-6.996	Benign	0.245	Neutral	0.117	Benign	0.03	Deleterious
p.Pro11Thr	VUS	-8.8407	Indeterminate	0.1032	Benign	-4.723	Benign	0.355	Neutral	0	Benign	0.08	Tolerated	12.11	Neutral
p.Pro11Arg	VUS	-1.89516	Neutral	0.1408	Benign	-4.492	Benign	0.179	Neutral	0.26	Benign	0.02	Deleterious	15.68	Deleterious
p.Pro11Ser	VUS	-2.26605	Neutral	0.1317	Benign	-3.342	Benign	0.192	Neutral	0.001	Benign	0.39	Tolerated	13.98	Neutral
p.Pro11Ile	VUS	-1.44716	Neutral	0.2722	Benign	-6.464	Benign	0.288	Neutral	0.062	Benign	0.01	Deleterious
p.Pro11Met	VUS	-0.320524	Neutral	0.3472	Ambiguous	-6.102	Benign	0.275	Neutral	0.148	Benign	0.01	Deleterious
p.Pro11His	VUS	-1.60399	Neutral	0.2077	Benign	-6.183	Benign	0.211	Neutral	0.448	Benign	0.01	Deleterious	16.24	Deleterious
p.Pro11Gln	VUS	-0.332961	Neutral	0.1602	Benign	-5.73	Benign	0.277	Neutral	0.261	Benign	0.02	Deleterious
p.Pro11Leu	VUS	-1.78338	Neutral	0.1679	Benign	-4.57	Benign	0.167	Neutral	0	Benign	0.02	Deleterious	16.66	Deleterious
p.Pro11Asp	VUS	-0.521979	Neutral	0.2892	Benign	-4.512	Benign	0.272	Neutral	0.014	Benign	0.03	Deleterious
p.Pro11Glu	VUS	-0.6798	Neutral	0.1989	Benign	-4.433	Benign	0.28	Neutral	0.004	Benign	0.03	Deleterious
p.Pro11Ala	VUS	-0.432519	Neutral	0.0698	Benign	-3.356	Benign	0.244	Neutral	0.004	Benign	0.12	Tolerated	8.488	Neutral
p.Pro11Gly	VUS	-1.88995	Neutral	0.1877	Benign	-3.645	Benign	0.269	Neutral	0.03	Benign	0.07	Tolerated
p.Pro11Val	VUS	-0.961132	Neutral	0.1648	Benign	-4.78	Benign	0.267	Neutral	0.005	Benign	0.03	Deleterious
p.Pro11Tyr	VUS	-2.83112	Neutral	0.354	Ambiguous	-6.834	Benign	0.257	Neutral	0.486	Possibly damaging	0.01	Deleterious
p.Pro11Cys	VUS	-0.756537	Neutral	0.498	Ambiguous	-6.122	Benign	0.269	Neutral	0.993	Probably damaging	0.01	Deleterious
p.Pro11Trp	VUS	-3.64218	Neutral	0.5068	Ambiguous	-6.734	Benign	0.284	Neutral	0.916	Possibly damaging	0	Deleterious
p.Pro11Phe	VUS	-2.4474	Neutral	0.3832	Ambiguous	-6.303	Benign	0.281	Neutral	0.318	Benign	0.01	Deleterious
p.Ser12Asn	VUS	-1.2352	Neutral	0.2205	Benign	-5.316	Benign	0.207	Neutral	0.007	Benign	0.19	Tolerated
p.Ser12Lys	VUS	-0.0751683	Neutral	0.4941	Ambiguous	-5.64	Benign	0.276	Neutral	0.099	Benign	0.2	Tolerated
p.Ser12Thr	VUS	-0.096657	Neutral	0.1004	Benign	-3.603	Benign	0.116	Neutral	0.001	Benign	0.56	Tolerated	9.197	Neutral
p.Ser12Arg	VUS	-0.440716	Neutral	0.3573	Ambiguous	-4.085	Benign	0.242	Neutral	0.182	Benign	0.15	Tolerated
p.Ser12Ile	VUS	-0.287313	Neutral	0.3674	Ambiguous	-6.379	Benign	0.229	Neutral	0.052	Benign	0.12	Tolerated
p.Ser12Met	VUS	-0.0416774	Neutral	0.3883	Ambiguous	-5.379	Benign	0.215	Neutral	0.278	Benign	0.08	Tolerated
p.Ser12His	VUS	-2.76018	Neutral	0.2754	Benign	-5.493	Benign	0.292	Neutral	0.704	Possibly damaging	0.09	Tolerated
p.Ser12Gln	VUS	-2.37954	Neutral	0.3265	Benign	-4.816	Benign	0.259	Neutral	0.438	Benign	0.14	Tolerated
p.Ser12Pro	VUS	-0.0541579	Neutral	0.1003	Benign	-3.175	Benign	0.273	Neutral	0	Benign	0.27	Tolerated	13.08	Neutral
p.Ser12Leu	VUS	-28.4223	Indeterminate	0.2277	Benign	-3.769	Benign	0.156	Neutral	0.001	Benign	0.19	Tolerated	17.06	Deleterious
p.Ser12Asp	VUS	-0.00873438	Neutral	0.2578	Benign	-3.255	Benign	0.284	Neutral	0.056	Benign	0.17	Tolerated
p.Ser12Glu	VUS	-1.21135	Neutral	0.2963	Benign	-3.816	Benign	0.275	Neutral	0.039	Benign	0.18	Tolerated
p.Ser12Ala	VUS	-0.695052	Neutral	0.0838	Benign	-1.942	Benign	0.147	Neutral	0	Benign	1	Tolerated	8.473	Neutral
p.Ser12Gly	VUS	-0.155158	Neutral	0.0863	Benign	-3.325	Benign	0.155	Neutral	0.138	Benign	0.53	Tolerated
p.Ser12Val	VUS	-4.84958	Neutral	0.2472	Benign	-4.023	Benign	0.21	Neutral	0.008	Benign	0.25	Tolerated
p.Ser12Tyr	VUS	-0.125212	Neutral	0.275	Benign	-6.405	Benign	0.235	Neutral	0.438	Benign	0.15	Tolerated
p.Ser12Cys	VUS	-2.59861	Neutral	0.1536	Benign	-5.629	Benign	0.231	Neutral	0.389	Benign	0.12	Tolerated
p.Ser12Trp	VUS	-3.5987	Neutral	0.3039	Benign	-6.43	Benign	0.236	Neutral	0.945	Possibly damaging	0.05	Deleterious	20.8	Deleterious
p.Ser12Phe	VUS	-1.3872	Neutral	0.3545	Ambiguous	-6.441	Benign	0.244	Neutral	0.278	Benign	0.13	Tolerated
p.Ala13Asn	VUS	-0.00189937	Neutral	0.438	Ambiguous	-6.944	Benign	0.294	Neutral	0.093	Benign	0.02	Deleterious
p.Ala13Lys	VUS	-0.0988746	Neutral	0.6185	Pathogenic	-7.443	Benign	0.488	Neutral	0.651	Possibly damaging	0.02	Deleterious
p.Ala13Thr	VUS	-0.0246688	Neutral	0.1729	Benign	-5.533	Benign	0.428	Neutral	0.334	Benign	0.04	Deleterious	23.3	Deleterious
p.Ala13Arg	VUS	-0.000772947	Neutral	0.3864	Ambiguous	-5.27	Benign	0.478	Neutral	0.93	Possibly damaging	0.02	Deleterious
p.Ala13Ser	VUS	-0.000425616	Neutral	0.1272	Benign	-4.226	Benign	0.427	Neutral	0.027	Benign	0.11	Tolerated	21.7	Deleterious
p.Ala13Ile	VUS	-0.00958103	Neutral	0.4987	Ambiguous	-8.075	Pathogenic	0.489	Neutral	0.93	Possibly damaging	0.01	Deleterious
p.Ala13Met	VUS	-0.815427	Neutral	0.5475	Ambiguous	-7.415	Benign	0.453	Neutral	0.993	Probably damaging	0.01	Deleterious
p.Ala13His	VUS	-0.1689	Neutral	0.5071	Ambiguous	-6.956	Benign	0.463	Neutral	0.993	Probably damaging	0.01	Deleterious
p.Ala13Gln	VUS	-0.0159167	Neutral	0.3861	Ambiguous	-5.954	Benign	0.465	Neutral	0.868	Possibly damaging	0.02	Deleterious
p.Ala13Pro	VUS	-0.000120958	Neutral	0.1107	Benign	-4.313	Benign	0.532	Disease	0.728	Possibly damaging	0.05	Deleterious	23.6	Deleterious
p.Ala13Leu	VUS	-0.183513	Neutral	0.3498	Ambiguous	-6.061	Benign	0.326	Neutral	0.791	Possibly damaging	0.02	Deleterious
p.Ala13Asp	VUS	-0.00679096	Neutral	0.3694	Ambiguous	-4.884	Benign	0.334	Neutral	0.001	Benign	0.02	Deleterious	15.22	Deleterious
p.Ala13Glu	VUS	-0.0119163	Neutral	0.3245	Benign	-4.654	Benign	0.457	Neutral	0.027	Benign	0.02	Deleterious
p.Ala13Gly	VUS	-0.00268238	Neutral	0.1406	Benign	-2.034	Benign	0.26	Neutral	0.001	Benign	1	Tolerated	10.78	Neutral
p.Ala13Val	VUS	-0.0459748	Neutral	0.2463	Benign	-5.391	Benign	0.28	Neutral	0.517	Possibly damaging	0.03	Deleterious	16.07	Deleterious
p.Ala13Tyr	VUS	-1.25658	Neutral	0.5778	Pathogenic	-8.639	Pathogenic	0.497	Neutral	0.976	Probably damaging	0.01	Deleterious
p.Ala13Cys	VUS	-0.585973	Neutral	0.5424	Ambiguous	-6.726	Benign	0.435	Neutral	0.976	Probably damaging	0.02	Deleterious
p.Ala13Trp	VUS	-0.391948	Neutral	0.6589	Pathogenic	-6.89	Benign	0.558	Disease	0.993	Probably damaging	0	Deleterious
p.Ala13Phe	VUS	-0.30771	Neutral	0.5088	Ambiguous	-8.314	Pathogenic	0.495	Neutral	0.976	Probably damaging	0.01	Deleterious
p.Asp14Asn	VUS	-3.69852	Neutral	0.2632	Benign	-6.072	Benign	0.448	Neutral	0.866	Possibly damaging	0.51	Tolerated	23.2	Deleterious
p.Asp14Lys	VUS	-2.50417	Neutral	0.7178	Pathogenic	-7.257	Benign	0.376	Neutral	0.972	Probably damaging	0.05	Deleterious
p.Asp14Thr	VUS	-0.449314	Neutral	0.4301	Ambiguous	-5.051	Benign	0.547	Disease	0.896	Possibly damaging	0.03	Deleterious
p.Asp14Arg	VUS	-15.0659	Indeterminate	0.529	Ambiguous	-4.627	Benign	0.545	Disease	0.986	Probably damaging	0.02	Deleterious
p.Asp14Ser	VUS	-0.399345	Neutral	0.2472	Benign	-3.921	Benign	0.503	Disease	0.938	Possibly damaging	0.06	Tolerated
p.Asp14Ile	VUS	-31.6917	Indeterminate	0.6665	Pathogenic	-7.708	Pathogenic	0.546	Disease	0.986	Probably damaging	0.01	Deleterious
p.Asp14Met	VUS	-21.5943	Indeterminate	0.866	Pathogenic	-7.471	Benign	0.575	Disease	0.998	Probably damaging	0	Deleterious
p.Asp14His	VUS	-0.667058	Neutral	0.4357	Ambiguous	-5.878	Benign	0.502	Disease	0.993	Probably damaging	0.02	Deleterious	24.4	Deleterious
p.Asp14Gln	VUS	-1.64371	Neutral	0.4993	Ambiguous	-5.12	Benign	0.452	Neutral	0.963	Probably damaging	0.04	Deleterious
p.Asp14Pro	VUS	-33.2154	Indeterminate	0.6188	Pathogenic	-4.809	Benign	0.399	Neutral	0.734	Possibly damaging	0.03	Deleterious
p.Asp14Leu	VUS	-11.6421	Indeterminate	0.5858	Pathogenic	-5.316	Benign	0.578	Disease	0.986	Probably damaging	0.01	Deleterious
p.Asp14Glu	VUS	-1.99067	Neutral	0.2793	Benign	-3.124	Benign	0.23	Neutral	0.001	Benign	0.23	Tolerated	15.97	Deleterious
p.Asp14Ala	VUS	-10.0129	Indeterminate	0.3026	Benign	-3.019	Benign	0.304	Neutral	0.143	Benign	0.04	Deleterious	19.29	Deleterious
p.Asp14Gly	VUS	-0.822077	Neutral	0.3097	Benign	-3.87	Benign	0.51	Disease	0.955	Possibly damaging	0.08	Tolerated	22.8	Deleterious
p.Asp14Val	VUS	-31.2909	Indeterminate	0.4601	Ambiguous	-5.236	Benign	0.596	Disease	0.82	Possibly damaging	0.01	Deleterious	22.8	Deleterious
p.Asp14Tyr	VUS	-18.8491	Indeterminate	0.4149	Ambiguous	-8.057	Pathogenic	0.539	Disease	0.999	Probably damaging	0.01	Deleterious	24.8	Deleterious
p.Asp14Cys	VUS	-1.62234	Neutral	0.7836	Pathogenic	-6.514	Benign	0.561	Disease	1	Probably damaging	0.01	Deleterious
p.Asp14Trp	VUS	-19.4339	Indeterminate	0.8783	Pathogenic	-7.132	Benign	0.585	Disease	0.999	Probably damaging	0	Deleterious
p.Asp14Phe	VUS	-21.9886	Indeterminate	0.7602	Pathogenic	-7.763	Pathogenic	0.575	Disease	0.999	Probably damaging	0.01	Deleterious
p.Trp15Asn	VUS	-4.96507	Neutral	0.2309	Benign	-3.042	Benign	0.265	Neutral	0.891	Possibly damaging	0.28	Tolerated
p.Trp15Lys	VUS	-2.58219	Neutral	0.2272	Benign	-2.621	Benign	0.264	Neutral	0.009	Benign	1	Tolerated
p.Trp15Thr	VUS	-11.3259	Indeterminate	0.075	Benign	-1.177	Benign	0.304	Neutral	0.641	Possibly damaging	0.31	Tolerated
p.Trp15Arg	VUS	-1.65434	Neutral	0.1096	Benign	0.635	Benign	0.121	Neutral	0.006	Benign	0.78	Tolerated	0.23	Neutral
p.Trp15Ser	VUS	-2.11407	Neutral	0.0605	Benign	0.169	Benign	0.192	Neutral	0.078	Benign	0.34	Tolerated	8.052	Neutral
p.Trp15Ile	VUS	-1.10017	Neutral	0.1638	Benign	-4.07	Benign	0.31	Neutral	0.491	Possibly damaging	0.12	Tolerated
p.Trp15Met	VUS	-1.86438	Neutral	0.256	Benign	-3.173	Benign	0.249	Neutral	0.435	Benign	0.08	Tolerated
p.Trp15His	VUS	-23.9441	Indeterminate	0.1528	Benign	-2.563	Benign	0.327	Neutral	0.993	Probably damaging	0.16	Tolerated
p.Trp15Gln	VUS	-4.61463	Neutral	0.1686	Benign	-0.15	Benign	0.223	Neutral	0.1	Benign	0.44	Tolerated
p.Trp15Pro	VUS	-27.7606	Indeterminate	0.3067	Benign	1.373	Benign	0.32	Neutral	0.976	Probably damaging	0.18	Tolerated
p.Trp15Leu	VUS	-0.522741	Neutral	0.0954	Benign	-0.596	Benign	0.183	Neutral	0.006	Benign	0.23	Tolerated	9.654	Neutral
p.Trp15Asp	VUS	-0.470616	Neutral	0.1087	Benign	0.237	Benign	0.278	Neutral	0.891	Possibly damaging	0.26	Tolerated
p.Trp15Glu	VUS	-0.289297	Neutral	0.0853	Benign	0.929	Benign	0.258	Neutral	0.097	Benign	0.53	Tolerated
p.Trp15Ala	VUS	-1.52268	Neutral	0.0419	Benign	1.49	Benign	0.312	Neutral	0.025	Benign	0.37	Tolerated
p.Trp15Gly	VUS	-9.01196	Indeterminate	0.0462	Benign	-0.706	Benign	0.202	Neutral	0.574	Possibly damaging	0.23	Tolerated	1.391	Neutral
p.Trp15Val	VUS	-1.16668	Neutral	0.0878	Benign	-1.432	Benign	0.321	Neutral	0.641	Possibly damaging	0.18	Tolerated
p.Trp15Tyr	VUS	-5.94026	Indeterminate	0.2419	Benign	-5.653	Benign	0.242	Neutral	0.74	Possibly damaging	0.12	Tolerated
p.Trp15Cys	VUS	-5.76461	Neutral	0.4442	Ambiguous	-3.132	Benign	0.295	Neutral	0.987	Probably damaging	0.04	Deleterious	22.95	Deleterious
p.Trp15Phe	VUS	-0.609578	Neutral	0.1351	Benign	-4.956	Benign	0.249	Neutral	0.856	Possibly damaging	0.08	Tolerated
p.Leu16Asn	VUS	-53.1508	Deleterious	0.9716	Pathogenic	-15.847	Pathogenic	0.797	Disease	1	Probably damaging	0	Deleterious
p.Leu16Lys	VUS	-53.1508	Deleterious	0.9344	Pathogenic	-15.366	Pathogenic	0.798	Disease	0.989	Probably damaging	0	Deleterious
p.Leu16Thr	VUS	-27.5504	Indeterminate	0.8342	Pathogenic	-12.655	Pathogenic	0.794	Disease	1	Probably damaging	0	Deleterious
p.Leu16Arg	Pathogenic	-53.1508	Deleterious	0.8404	Pathogenic	-11.976	Pathogenic	0.923	Disease	0.999	Probably damaging	0	Deleterious	22.8	Deleterious
p.Leu16Ser	VUS	-53.1508	Deleterious	0.9741	Pathogenic	-12.285	Pathogenic	0.892	Disease	1	Probably damaging	0	Deleterious
p.Leu16Ile	VUS	-6.96395	Indeterminate	0.2336	Benign	-9.939	Pathogenic	0.528	Disease	0.998	Probably damaging	0	Deleterious
p.Leu16Met	VUS	-2.6344	Neutral	0.6008	Pathogenic	-8.999	Pathogenic	0.656	Disease	1	Probably damaging	0	Deleterious	20.3	Deleterious
p.Leu16His	VUS	-53.1508	Deleterious	0.9733	Pathogenic	-12.952	Pathogenic	0.861	Disease	1	Probably damaging	0	Deleterious
p.Leu16Gln	VUS	-53.1508	Deleterious	0.922	Pathogenic	-12.588	Pathogenic	0.739	Disease	1	Probably damaging	0	Deleterious	22.6	Deleterious
p.Leu16Pro	Pathogenic	-53.1508	Deleterious	0.8704	Pathogenic	-9.979	Pathogenic	0.935	Disease	1	Probably damaging	0	Deleterious	22.7	Deleterious
p.Leu16Asp	VUS	-53.1508	Deleterious	0.991	Pathogenic	-14.187	Pathogenic	0.798	Disease	1	Probably damaging	0	Deleterious
p.Leu16Glu	VUS	-53.1508	Deleterious	0.9364	Pathogenic	-13.678	Pathogenic	0.816	Disease	1	Probably damaging	0	Deleterious
p.Leu16Ala	VUS	-53.1508	Deleterious	0.8452	Pathogenic	-11.518	Pathogenic	0.779	Disease	1	Probably damaging	0	Deleterious
p.Leu16Gly	VUS	-53.1508	Deleterious	0.9484	Pathogenic	-12.237	Pathogenic	0.807	Disease	0.996	Probably damaging	0	Deleterious
p.Leu16Val	VUS	-14.2093	Indeterminate	0.2881	Benign	-9.219	Pathogenic	0.613	Disease	0.979	Probably damaging	0	Deleterious	19.96	Deleterious
p.Leu16Tyr	VUS	-53.1508	Deleterious	0.971	Pathogenic	-13.001	Pathogenic	0.754	Disease	0.919	Possibly damaging	0	Deleterious
p.Leu16Cys	VUS	-16.6972	Indeterminate	0.9711	Pathogenic	-12.746	Pathogenic	0.738	Disease	1	Probably damaging	0	Deleterious
p.Leu16Trp	VUS	-53.1508	Deleterious	0.9529	Pathogenic	-11.305	Pathogenic	0.811	Disease	0.775	Possibly damaging	0	Deleterious
p.Leu16Phe	VUS	-4.61327	Neutral	0.8727	Pathogenic	-9.341	Pathogenic	0.665	Disease	0.99	Probably damaging	0	Deleterious
p.Ala17Asn	VUS	-9.84008	Indeterminate	0.6872	Pathogenic	-9.332	Pathogenic	0.497	Neutral	0.742	Possibly damaging	0.31	Tolerated
p.Ala17Lys	VUS	-53.1508	Deleterious	0.9286	Pathogenic	-14.126	Pathogenic	0.545	Disease	0.989	Probably damaging	0.34	Tolerated
p.Ala17Thr	VUS	-4.29934	Neutral	0.3334	Benign	-5.987	Benign	0.195	Neutral	0.044	Benign	1	Tolerated	8.805	Neutral
p.Ala17Arg	VUS	-53.1508	Deleterious	0.7662	Pathogenic	-7.438	Benign	0.517	Disease	0.989	Probably damaging	0.26	Tolerated
p.Ala17Ser	VUS	-1.95733	Neutral	0.1489	Benign	-1.744	Benign	0.204	Neutral	0.005	Benign	0.86	Tolerated	7.001	Neutral
p.Ala17Ile	VUS	-9.63251	Indeterminate	0.7279	Pathogenic	-11.129	Pathogenic	0.477	Neutral	0.989	Probably damaging	0.24	Tolerated
p.Ala17Met	VUS	-53.1508	Deleterious	0.6403	Pathogenic	-10.493	Pathogenic	0.441	Neutral	1	Probably damaging	0.12	Tolerated
p.Ala17His	VUS	-2.96335	Neutral	0.6352	Pathogenic	-9.788	Pathogenic	0.508	Disease	1	Probably damaging	0.3	Tolerated
p.Ala17Gln	VUS	-53.1508	Deleterious	0.6395	Pathogenic	-10.722	Pathogenic	0.5	Neutral	0.995	Probably damaging	0.25	Tolerated
p.Ala17Pro	VUS	-1.62651	Neutral	0.7021	Pathogenic	-8.271	Pathogenic	0.593	Disease	0.974	Probably damaging	0.22	Tolerated	18.05	Deleterious
p.Ala17Leu	VUS	-53.1508	Deleterious	0.4601	Ambiguous	-8.163	Pathogenic	0.469	Neutral	0.929	Possibly damaging	0.44	Tolerated
p.Ala17Asp	VUS	-33.2193	Indeterminate	0.8263	Pathogenic	-11.492	Pathogenic	0.616	Disease	0.949	Possibly damaging	0.25	Tolerated	19.75	Deleterious
p.Ala17Glu	VUS	-53.1508	Deleterious	0.7232	Pathogenic	-11.647	Pathogenic	0.492	Neutral	0.972	Probably damaging	0.31	Tolerated
p.Ala17Gly	VUS	-0.699678	Neutral	0.2309	Benign	-3.656	Benign	0.282	Neutral	0.022	Benign	0.28	Tolerated	12.08	Neutral
p.Ala17Val	VUS	-1.03575	Neutral	0.4005	Ambiguous	-8.457	Pathogenic	0.424	Neutral	0.88	Possibly damaging	0.37	Tolerated	18.67	Deleterious
p.Ala17Tyr	VUS	-53.1508	Deleterious	0.7144	Pathogenic	-8.935	Pathogenic	0.489	Neutral	0.998	Probably damaging	0.35	Tolerated
p.Ala17Cys	VUS	-0.4097	Neutral	0.4436	Ambiguous	-0.719	Benign	0.29	Neutral	0.104	Benign	0.11	Tolerated
p.Ala17Trp	VUS	-53.1508	Deleterious	0.7941	Pathogenic	-8.743	Pathogenic	0.54	Disease	1	Probably damaging	0.07	Tolerated
p.Ala17Phe	VUS	-53.1508	Deleterious	0.5587	Ambiguous	-8.361	Pathogenic	0.474	Neutral	0.995	Probably damaging	0.26	Tolerated
p.Thr18Asn	VUS	-33.2121	Indeterminate	0.1808	Benign	-4.857	Benign	0.19	Neutral	0.119	Benign	0.54	Tolerated
p.Thr18Lys	VUS	-14.0035	Indeterminate	0.2385	Benign	-3.9	Benign	0.324	Neutral	0.759	Possibly damaging	0.86	Tolerated	11.22	Neutral
p.Thr18Arg	VUS	-12.8011	Indeterminate	0.1601	Benign	-1.733	Benign	0.251	Neutral	0.05	Benign	0.52	Tolerated	10.25	Neutral
p.Thr18Ser	VUS	-5.56736	Neutral	0.1443	Benign	-2.823	Benign	0.087	Neutral	0.014	Benign	0.88	Tolerated	0.388	Neutral
p.Thr18Ile	VUS	-28.4555	Indeterminate	0.3255	Benign	-5.319	Benign	0.253	Neutral	0.92	Possibly damaging	0.18	Tolerated
p.Thr18Met	VUS	-20.8377	Indeterminate	0.1935	Benign	-5.463	Benign	0.253	Neutral	0.997	Probably damaging	0.1	Tolerated	18.95	Deleterious
p.Thr18His	VUS	-10.3868	Indeterminate	0.2746	Benign	-4.585	Benign	0.327	Neutral	0.986	Probably damaging	0.13	Tolerated
p.Thr18Gln	VUS	-10.0015	Indeterminate	0.2261	Benign	-2.838	Benign	0.253	Neutral	0.843	Possibly damaging	0.55	Tolerated
p.Thr18Pro	VUS	-53.1508	Deleterious	0.3192	Benign	-5.581	Benign	0.305	Neutral	0.996	Probably damaging	0.27	Tolerated	16.16	Deleterious
p.Thr18Leu	VUS	-29.3422	Indeterminate	0.1703	Benign	-3.261	Benign	0.308	Neutral	0.622	Possibly damaging	0.28	Tolerated
p.Thr18Asp	VUS	-12.0314	Indeterminate	0.3507	Ambiguous	-0.564	Benign	0.302	Neutral	0.834	Possibly damaging	0.63	Tolerated
p.Thr18Glu	VUS	-6.40676	Indeterminate	0.2686	Benign	0	Benign	0.344	Neutral	0.03	Benign	1	Tolerated
p.Thr18Ala	VUS	-32.5009	Indeterminate	0.0864	Benign	-1.412	Benign	0.114	Neutral	0.003	Benign	0.71	Tolerated	4.842	Neutral
p.Thr18Gly	VUS	-10.6461	Indeterminate	0.1799	Benign	-3.116	Benign	0.344	Neutral	0.987	Probably damaging	0.44	Tolerated
p.Thr18Val	VUS	-4.76682	Neutral	0.1968	Benign	-3.118	Benign	0.275	Neutral	0.54	Possibly damaging	0.27	Tolerated
p.Thr18Tyr	VUS	-33.2193	Indeterminate	0.3702	Ambiguous	-7.098	Benign	0.317	Neutral	0.995	Probably damaging	0.05	Deleterious
p.Thr18Cys	VUS	-1.61997	Neutral	0.5219	Ambiguous	-4.876	Benign	0.339	Neutral	1	Probably damaging	0.06	Tolerated
p.Thr18Trp	VUS	-11.9394	Indeterminate	0.5556	Ambiguous	-5.043	Benign	0.361	Neutral	0.999	Probably damaging	0.02	Deleterious
p.Thr18Phe	VUS	-16.7919	Indeterminate	0.3527	Ambiguous	-6.879	Benign	0.323	Neutral	0.984	Probably damaging	0.05	Deleterious
p.Ala19Asn	VUS	-7.87427e-08	Neutral	0.9159	Pathogenic	-10.761	Pathogenic	0.664	Disease	0.999	Probably damaging	0	Deleterious
p.Ala19Lys	VUS	-2.41738	Neutral	0.9718	Pathogenic	-11.613	Pathogenic	0.68	Disease	1	Probably damaging	0	Deleterious
p.Ala19Thr	VUS	-0.00273282	Neutral	0.6153	Pathogenic	-8.563	Pathogenic	0.404	Neutral	1	Probably damaging	0	Deleterious	24.9	Deleterious
p.Ala19Arg	VUS	-0.431699	Neutral	0.8976	Pathogenic	-9.405	Pathogenic	0.686	Disease	1	Probably damaging	0	Deleterious
p.Ala19Ser	VUS	-2.28582e-07	Neutral	0.3024	Benign	-7.073	Benign	0.627	Disease	0.994	Probably damaging	0	Deleterious	24.4	Deleterious
p.Ala19Ile	VUS	-6.77845e-05	Neutral	0.9252	Pathogenic	-10.544	Pathogenic	0.709	Disease	1	Probably damaging	0	Deleterious
p.Ala19Met	VUS	-5.92176e-07	Neutral	0.8556	Pathogenic	-9.744	Pathogenic	0.679	Disease	1	Probably damaging	0	Deleterious
p.Ala19His	VUS	-0.00232513	Neutral	0.9204	Pathogenic	-9.085	Pathogenic	0.7	Disease	1	Probably damaging	0	Deleterious
p.Ala19Gln	VUS	-1.39419e-06	Neutral	0.838	Pathogenic	-8.781	Pathogenic	0.703	Disease	1	Probably damaging	0	Deleterious
p.Ala19Pro	VUS	-53.1508	Deleterious	0.9399	Pathogenic	-9.946	Pathogenic	0.808	Disease	1	Probably damaging	0	Deleterious	25	Deleterious
p.Ala19Leu	VUS	-4.86034e-09	Neutral	0.7054	Pathogenic	-6.761	Benign	0.697	Disease	1	Probably damaging	0	Deleterious
p.Ala19Asp	VUS	-2.13684	Neutral	0.9431	Pathogenic	-9.757	Pathogenic	0.712	Disease	0.988	Probably damaging	0	Deleterious	24.4	Deleterious
p.Ala19Glu	VUS	-2.80851e-06	Neutral	0.8421	Pathogenic	-7.546	Pathogenic	0.75	Disease	1	Probably damaging	0	Deleterious
p.Ala19Gly	VUS	-5.88909e-06	Neutral	0.4339	Ambiguous	-8.652	Pathogenic	0.439	Neutral	1	Probably damaging	0	Deleterious	24.3	Deleterious
p.Ala19Val	VUS	-0.000974384	Neutral	0.6525	Pathogenic	-7.643	Pathogenic	0.415	Neutral	1	Probably damaging	0	Deleterious	24.4	Deleterious
p.Ala19Tyr	VUS	-0.000363476	Neutral	0.9382	Pathogenic	-10.252	Pathogenic	0.7	Disease	1	Probably damaging	0	Deleterious
p.Ala19Cys	VUS	-1.56098	Neutral	0.7644	Pathogenic	-8.254	Pathogenic	0.646	Disease	1	Probably damaging	0	Deleterious
p.Ala19Trp	VUS	-1.1767e-08	Neutral	0.9775	Pathogenic	-10.402	Pathogenic	0.694	Disease	1	Probably damaging	0	Deleterious
p.Ala19Phe	VUS	0	Neutral	0.9254	Pathogenic	-9.571	Pathogenic	0.709	Disease	1	Probably damaging	0	Deleterious
p.Ala20Asn	VUS	-53.1508	Deleterious	0.9857	Pathogenic	-20	Pathogenic	0.639	Disease	0.958	Probably damaging	0.02	Deleterious
p.Ala20Lys	VUS	-53.1508	Deleterious	0.9947	Pathogenic	-21.456	Pathogenic	0.679	Disease	0.999	Probably damaging	0.02	Deleterious
p.Ala20Thr	VUS	-21.9146	Indeterminate	0.4994	Ambiguous	-8.436	Pathogenic	0.617	Disease	0.996	Probably damaging	0.21	Tolerated	22.5	Deleterious
p.Ala20Arg	VUS	-53.1508	Deleterious	0.9718	Pathogenic	-18.124	Pathogenic	0.688	Disease	0.999	Probably damaging	0.06	Tolerated
p.Ala20Ser	VUS	-24.8899	Indeterminate	0.314	Benign	-6.996	Benign	0.369	Neutral	0.196	Benign	0.26	Tolerated	14.86	Neutral
p.Ala20Ile	VUS	-53.1508	Deleterious	0.8642	Pathogenic	-14.213	Pathogenic	0.688	Disease	0.997	Probably damaging	0.01	Deleterious
p.Ala20Met	VUS	-53.1508	Deleterious	0.9152	Pathogenic	-17.286	Pathogenic	0.639	Disease	1	Probably damaging	0.01	Deleterious
p.Ala20His	VUS	-53.1508	Deleterious	0.9892	Pathogenic	-21.466	Pathogenic	0.683	Disease	1	Probably damaging	0	Deleterious
p.Ala20Gln	VUS	-53.1508	Deleterious	0.9628	Pathogenic	-19.569	Pathogenic	0.679	Disease	0.999	Probably damaging	0.01	Deleterious
p.Ala20Pro	VUS	-53.1508	Deleterious	0.9523	Pathogenic	-15.028	Pathogenic	0.765	Disease	0.999	Probably damaging	0.02	Deleterious	22.7	Deleterious
p.Ala20Leu	VUS	-53.1508	Deleterious	0.8092	Pathogenic	-16.052	Pathogenic	0.68	Disease	0.99	Probably damaging	0.01	Deleterious
p.Ala20Asp	VUS	-53.1508	Deleterious	0.9918	Pathogenic	-19.885	Pathogenic	0.732	Disease	0.995	Probably damaging	0.01	Deleterious
p.Ala20Glu	VUS	-53.1508	Deleterious	0.9769	Pathogenic	-18.55	Pathogenic	0.717	Disease	0.998	Probably damaging	0.01	Deleterious	22.9	Deleterious
p.Ala20Gly	VUS	-53.1508	Deleterious	0.5386	Ambiguous	-11.279	Pathogenic	0.552	Disease	0.987	Probably damaging	0.03	Deleterious	22.9	Deleterious
p.Ala20Val	VUS	-9.52822	Indeterminate	0.4974	Ambiguous	-9.605	Pathogenic	0.622	Disease	0.845	Possibly damaging	0.02	Deleterious	20.6	Deleterious
p.Ala20Tyr	VUS	-53.1508	Deleterious	0.9936	Pathogenic	-19.338	Pathogenic	0.68	Disease	1	Probably damaging	0	Deleterious
p.Ala20Cys	VUS	-5.51832	Neutral	0.7415	Pathogenic	-8.547	Pathogenic	0.589	Disease	1	Probably damaging	0.01	Deleterious
p.Ala20Trp	VUS	-53.1508	Deleterious	0.9964	Pathogenic	-18.45	Pathogenic	0.686	Disease	1	Probably damaging	0	Deleterious
p.Ala20Phe	VUS	-53.1508	Deleterious	0.9813	Pathogenic	-19.048	Pathogenic	0.688	Disease	1	Probably damaging	0	Deleterious
p.Ala21Asn	VUS	-53.1508	Deleterious	0.8048	Pathogenic	-13.275	Pathogenic	0.629	Disease	0.991	Probably damaging	0.02	Deleterious
p.Ala21Lys	VUS	-53.1508	Deleterious	0.8769	Pathogenic	-13.498	Pathogenic	0.637	Disease	1	Probably damaging	0.03	Deleterious
p.Ala21Thr	VUS	-9.17999	Indeterminate	0.4417	Ambiguous	-9.887	Pathogenic	0.525	Disease	0.996	Probably damaging	0.06	Tolerated	23.3	Deleterious
p.Ala21Arg	VUS	-53.1508	Deleterious	0.6339	Pathogenic	-11.054	Pathogenic	0.61	Disease	1	Probably damaging	0.02	Deleterious
p.Ala21Ser	VUS	-2.0901	Neutral	0.1823	Benign	-6.29	Benign	0.519	Disease	0.522	Possibly damaging	0.22	Tolerated	21.1	Deleterious
p.Ala21Ile	VUS	-53.1508	Deleterious	0.7395	Pathogenic	-13.318	Pathogenic	0.639	Disease	1	Probably damaging	0.03	Deleterious
p.Ala21Met	VUS	-53.1508	Deleterious	0.6696	Pathogenic	-11.97	Pathogenic	0.632	Disease	1	Probably damaging	0.02	Deleterious
p.Ala21His	VUS	-53.1508	Deleterious	0.8021	Pathogenic	-13.246	Pathogenic	0.633	Disease	1	Probably damaging	0.01	Deleterious
p.Ala21Gln	VUS	-53.1508	Deleterious	0.5501	Ambiguous	-11.632	Pathogenic	0.619	Disease	1	Probably damaging	0.02	Deleterious
p.Ala21Pro	VUS	-53.1508	Deleterious	0.9341	Pathogenic	-14.223	Pathogenic	0.673	Disease	0.999	Probably damaging	0.06	Tolerated	23.5	Deleterious
p.Ala21Leu	VUS	-5.31085	Neutral	0.5239	Ambiguous	-11.896	Pathogenic	0.631	Disease	1	Probably damaging	0.18	Tolerated
p.Ala21Asp	VUS	-53.1508	Deleterious	0.908	Pathogenic	-11.713	Pathogenic	0.738	Disease	0.999	Probably damaging	0.02	Deleterious	25.2	Deleterious
p.Ala21Glu	VUS	-53.1508	Deleterious	0.7135	Pathogenic	-9.296	Pathogenic	0.67	Disease	0.999	Probably damaging	0.03	Deleterious
p.Ala21Gly	VUS	-0.522693	Neutral	0.2534	Benign	-0.837	Benign	0.508	Disease	0.993	Probably damaging	0.13	Tolerated	24.6	Deleterious
p.Ala21Val	VUS	-1.47407	Neutral	0.4395	Ambiguous	-10.011	Pathogenic	0.457	Neutral	0.999	Probably damaging	0.06	Tolerated	25	Deleterious
p.Ala21Tyr	VUS	-53.1508	Deleterious	0.7762	Pathogenic	-11.786	Pathogenic	0.658	Disease	1	Probably damaging	0.01	Deleterious
p.Ala21Cys	VUS	-0.744533	Neutral	0.6253	Pathogenic	-8.76	Pathogenic	0.589	Disease	1	Probably damaging	0.03	Deleterious
p.Ala21Trp	VUS	-53.1508	Deleterious	0.8406	Pathogenic	-11.164	Pathogenic	0.673	Disease	1	Probably damaging	0	Deleterious
p.Ala21Phe	VUS	-53.1508	Deleterious	0.7034	Pathogenic	-12.109	Pathogenic	0.666	Disease	1	Probably damaging	0.01	Deleterious
p.Arg22Asn	VUS	-1.24176e-07	Neutral	0.5974	Pathogenic	-6.509	Benign	0.44	Neutral	0.988	Probably damaging	0.07	Tolerated
p.Arg22Lys	VUS	-1.44083	Neutral	0.2087	Benign	-6.503	Benign	0.156	Neutral	0.282	Benign	0.25	Tolerated
p.Arg22Thr	VUS	-27.664	Indeterminate	0.3244	Benign	-7.753	Pathogenic	0.283	Neutral	0.766	Possibly damaging	0.09	Tolerated
p.Arg22Ser	VUS	-23.8688	Indeterminate	0.4527	Ambiguous	-6.49	Benign	0.359	Neutral	0.993	Probably damaging	0.23	Tolerated
p.Arg22Ile	VUS	-0.979664	Neutral	0.4942	Ambiguous	-11.18	Pathogenic	0.454	Neutral	0.995	Probably damaging	0.03	Deleterious
p.Arg22Met	VUS	-8.42171	Indeterminate	0.4456	Ambiguous	-9.137	Pathogenic	0.472	Neutral	0.979	Probably damaging	0.02	Deleterious
p.Arg22His	VUS	-2.27786e-09	Neutral	0.16	Benign	-4.4	Benign	0.316	Neutral	0.99	Probably damaging	0.04	Deleterious
p.Arg22Gln	VUS	-1.36936e-07	Neutral	0.1157	Benign	-5.42	Benign	0.163	Neutral	0.78	Possibly damaging	0.15	Tolerated	12.71	Neutral
p.Arg22Pro	VUS	-53.1508	Deleterious	0.8905	Pathogenic	-11.548	Pathogenic	0.539	Disease	1	Probably damaging	0.05	Deleterious	20.4	Deleterious
p.Arg22Leu	VUS	-0.0164725	Neutral	0.2206	Benign	-6.54	Benign	0.221	Neutral	0.514	Possibly damaging	0.1	Tolerated	12.51	Neutral
p.Arg22Asp	VUS	-6.68565	Indeterminate	0.6151	Pathogenic	-6.663	Benign	0.471	Neutral	0.997	Probably damaging	0.05	Deleterious
p.Arg22Glu	VUS	-3.71788e-08	Neutral	0.2995	Benign	-6.72	Benign	0.374	Neutral	0.839	Possibly damaging	0.11	Tolerated
p.Arg22Ala	VUS	-0.00627285	Neutral	0.2965	Benign	-5.508	Benign	0.41	Neutral	0.946	Possibly damaging	0.22	Tolerated
p.Arg22Gly	VUS	-53.1508	Deleterious	0.2016	Benign	-6.845	Benign	0.245	Neutral	0.474	Possibly damaging	0.06	Tolerated	16.11	Deleterious
p.Arg22Val	VUS	-0.156059	Neutral	0.4546	Ambiguous	-8.958	Pathogenic	0.448	Neutral	0.993	Probably damaging	0.05	Deleterious
p.Arg22Tyr	VUS	-3.7907	Neutral	0.4817	Ambiguous	-6.027	Benign	0.406	Neutral	0.943	Possibly damaging	0.03	Deleterious
p.Arg22Cys	VUS	0	Neutral	0.2916	Benign	-6.74	Benign	0.265	Neutral	1	Probably damaging	0.01	Deleterious
p.Arg22Trp	VUS	-9.6384	Indeterminate	0.2423	Benign	-8.266	Pathogenic	0.531	Disease	1	Probably damaging	0.01	Deleterious	23.5	Deleterious
p.Arg22Phe	VUS	-32.6372	Indeterminate	0.5572	Ambiguous	-7.963	Pathogenic	0.45	Neutral	0.892	Possibly damaging	0.02	Deleterious
p.Gly23Asn	VUS	-21.5796	Indeterminate	0.88	Pathogenic	-9.276	Pathogenic	0.658	Disease	1	Probably damaging	0.21	Tolerated
p.Gly23Lys	VUS	-53.1508	Deleterious	0.9761	Pathogenic	-13.719	Pathogenic	0.7	Disease	1	Probably damaging	0.01	Deleterious
p.Gly23Thr	VUS	-53.1508	Deleterious	0.9417	Pathogenic	-11.015	Pathogenic	0.642	Disease	1	Probably damaging	0.01	Deleterious
p.Gly23Arg	Likely pathogenic	-53.1508	Deleterious	0.9175	Pathogenic	-11.14	Pathogenic	0.494	Neutral	1	Probably damaging	0.01	Deleterious	27.2	Deleterious
p.Gly23Ser	Likely pathogenic	-53.1508	Deleterious	0.6877	Pathogenic	-8.748	Pathogenic	0.673	Disease	0.994	Probably damaging	0.03	Deleterious	26.9	Deleterious
p.Gly23Ile	VUS	-53.1508	Deleterious	0.9805	Pathogenic	-13.316	Pathogenic	0.707	Disease	1	Probably damaging	0	Deleterious
p.Gly23Met	VUS	-53.1508	Deleterious	0.9793	Pathogenic	-13.178	Pathogenic	0.707	Disease	1	Probably damaging	0	Deleterious
p.Gly23His	VUS	-53.1508	Deleterious	0.9519	Pathogenic	-12.102	Pathogenic	0.676	Disease	1	Probably damaging	0.01	Deleterious
p.Gly23Gln	VUS	-53.1508	Deleterious	0.9087	Pathogenic	-11.134	Pathogenic	0.647	Disease	1	Probably damaging	0.01	Deleterious
p.Gly23Pro	VUS	-53.1508	Deleterious	0.9957	Pathogenic	-12.376	Pathogenic	0.47	Neutral	1	Probably damaging	0.01	Deleterious
p.Gly23Leu	VUS	-53.1508	Deleterious	0.9462	Pathogenic	-11.124	Pathogenic	0.703	Disease	1	Probably damaging	0	Deleterious
p.Gly23Asp	Pathogenic	-53.1508	Deleterious	0.8537	Pathogenic	-9.16	Pathogenic	0.827	Disease	1	Probably damaging	0.04	Deleterious	27.7	Deleterious
p.Gly23Glu	VUS	-53.1508	Deleterious	0.9158	Pathogenic	-9.002	Pathogenic	0.781	Disease	1	Probably damaging	0.01	Deleterious
p.Gly23Ala	VUS	-1.28694	Neutral	0.7359	Pathogenic	-7.213	Benign	0.65	Disease	0.999	Probably damaging	0.02	Deleterious	26.1	Deleterious
p.Gly23Val	VUS	-53.1508	Deleterious	0.955	Pathogenic	-10.22	Pathogenic	0.81	Disease	1	Probably damaging	0	Deleterious	27.3	Deleterious
p.Gly23Tyr	VUS	-53.1508	Deleterious	0.9386	Pathogenic	-15.288	Pathogenic	0.709	Disease	1	Probably damaging	0	Deleterious
p.Gly23Cys	VUS	-53.1508	Deleterious	0.8139	Pathogenic	-9.869	Pathogenic	0.842	Disease	1	Probably damaging	0	Deleterious	28.1	Deleterious
p.Gly23Trp	VUS	-53.1508	Deleterious	0.9369	Pathogenic	-13.939	Pathogenic	0.76	Disease	1	Probably damaging	0	Deleterious
p.Gly23Phe	VUS	-53.1508	Deleterious	0.9795	Pathogenic	-14.732	Pathogenic	0.733	Disease	1	Probably damaging	0	Deleterious
p.Arg24Asn	VUS	-0.624774	Neutral	0.4681	Ambiguous	-4.433	Benign	0.222	Neutral	0.854	Possibly damaging	0.43	Tolerated
p.Arg24Lys	VUS	-1.71931	Neutral	0.2416	Benign	-5.534	Benign	0.232	Neutral	0.616	Possibly damaging	1	Tolerated
p.Arg24Thr	VUS	-3.98362	Neutral	0.4732	Ambiguous	-5.85	Benign	0.386	Neutral	0.985	Probably damaging	0.42	Tolerated
p.Arg24Ser	VUS	-0.2102	Neutral	0.4235	Ambiguous	-3.877	Benign	0.384	Neutral	0.996	Probably damaging	0.49	Tolerated
p.Arg24Ile	VUS	-0.341543	Neutral	0.6604	Pathogenic	-9.378	Pathogenic	0.479	Neutral	0.999	Probably damaging	0.19	Tolerated
p.Arg24Met	VUS	-0.599835	Neutral	0.5378	Ambiguous	-8.069	Pathogenic	0.457	Neutral	0.684	Possibly damaging	0.11	Tolerated
p.Arg24His	VUS	-0.0095641	Neutral	0.1286	Benign	-5.361	Benign	0.109	Neutral	0.987	Probably damaging	0.27	Tolerated
p.Arg24Gln	VUS	-16.2106	Indeterminate	0.1196	Benign	-4.467	Benign	0.077	Neutral	0.732	Possibly damaging	0.61	Tolerated	18.45	Deleterious
p.Arg24Pro	Pathogenic	-53.1508	Deleterious	0.9136	Pathogenic	-8.082	Pathogenic	0.633	Disease	1	Probably damaging	0.24	Tolerated	22.8	Deleterious
p.Arg24Leu	VUS	-1.06502	Neutral	0.2995	Benign	-5.722	Benign	0.126	Neutral	0.997	Probably damaging	0.35	Tolerated	19.08	Deleterious
p.Arg24Asp	VUS	-0.00240524	Neutral	0.4363	Ambiguous	-1.335	Benign	0.192	Neutral	0.787	Possibly damaging	0.64	Tolerated
p.Arg24Glu	VUS	-1.01348	Neutral	0.3064	Benign	-2.836	Benign	0.203	Neutral	0.801	Possibly damaging	0.8	Tolerated
p.Arg24Ala	VUS	-0.034101	Neutral	0.3784	Ambiguous	-3.756	Benign	0.394	Neutral	0.985	Probably damaging	0.53	Tolerated
p.Arg24Gly	VUS	-2.9563	Neutral	0.2927	Benign	-5.243	Benign	0.144	Neutral	0.998	Probably damaging	0.33	Tolerated	23	Deleterious
p.Arg24Val	VUS	-0.117092	Neutral	0.5914	Pathogenic	-6.665	Benign	0.483	Neutral	0.996	Probably damaging	0.26	Tolerated
p.Arg24Tyr	VUS	-1.11951	Neutral	0.5087	Ambiguous	-8.91	Pathogenic	0.382	Neutral	0.761	Possibly damaging	0.24	Tolerated
p.Arg24Cys	VUS	-0.0896543	Neutral	0.2899	Benign	-5.581	Benign	0.166	Neutral	1	Probably damaging	0.07	Tolerated
p.Arg24Trp	VUS	-0.432153	Neutral	0.2888	Benign	-8.644	Pathogenic	0.185	Neutral	0.323	Benign	0.06	Tolerated	22.7	Deleterious
p.Arg24Phe	VUS	-0.0853363	Neutral	0.6672	Pathogenic	-9.227	Pathogenic	0.464	Neutral	0.761	Possibly damaging	0.17	Tolerated
p.Val25Asn	VUS	-4.23633	Neutral	0.4525	Ambiguous	-10.67	Pathogenic	0.296	Neutral	0.838	Possibly damaging	0.02	Deleterious
p.Val25Lys	VUS	-17.8096	Indeterminate	0.4628	Ambiguous	-10.719	Pathogenic	0.291	Neutral	0.124	Benign	0.03	Deleterious
p.Val25Thr	VUS	-1.42407	Neutral	0.1379	Benign	-5.742	Benign	0.161	Neutral	0.043	Benign	0.32	Tolerated
p.Val25Arg	VUS	-3.2829	Neutral	0.3039	Benign	-8.246	Pathogenic	0.179	Neutral	0.377	Benign	0.02	Deleterious
p.Val25Ser	VUS	-0.425786	Neutral	0.2142	Benign	-7.236	Benign	0.265	Neutral	0.803	Possibly damaging	0.03	Deleterious
p.Val25Ile	VUS	-0.501462	Neutral	0.1369	Benign	-7.019	Benign	0.129	Neutral	0.008	Benign	0.39	Tolerated	14.12	Neutral
p.Val25Met	VUS	-21.0348	Indeterminate	0.3185	Benign	-7.602	Pathogenic	0.162	Neutral	0.603	Possibly damaging	0.05	Deleterious
p.Val25His	VUS	-0.256165	Neutral	0.4947	Ambiguous	-7.06	Benign	0.201	Neutral	0.904	Possibly damaging	0.01	Deleterious
p.Val25Gln	VUS	-0.5247	Neutral	0.3048	Benign	-8.275	Pathogenic	0.271	Neutral	0.414	Benign	0.03	Deleterious
p.Val25Pro	VUS	-0.00191036	Neutral	0.2132	Benign	-6.084	Benign	0.285	Neutral	0.838	Possibly damaging	0.04	Deleterious
p.Val25Leu	VUS	-0.0634044	Neutral	0.2415	Benign	-3.551	Benign	0.12	Neutral	0	Benign	0.33	Tolerated	12.09	Neutral
p.Val25Asp	VUS	-17.553	Indeterminate	0.2921	Benign	-6.728	Benign	0.325	Neutral	0.96	Probably damaging	0.01	Deleterious
p.Val25Glu	VUS	-0.183053	Neutral	0.1475	Benign	-3.45	Benign	0.164	Neutral	0.032	Benign	0.08	Tolerated	4.463	Neutral
p.Val25Ala	VUS	-53.1508	Deleterious	0.0978	Benign	-4.129	Benign	0.062	Neutral	0.006	Benign	0.38	Tolerated	0.341	Neutral
p.Val25Gly	VUS	-19.9374	Indeterminate	0.1571	Benign	-7.742	Pathogenic	0.145	Neutral	0.911	Possibly damaging	0	Deleterious	5.284	Neutral
p.Val25Tyr	VUS	-33.2193	Indeterminate	0.5066	Ambiguous	-6.863	Benign	0.274	Neutral	0.811	Possibly damaging	0.01	Deleterious
p.Val25Cys	VUS	-0.00247182	Neutral	0.6914	Pathogenic	-6.536	Benign	0.193	Neutral	0.928	Possibly damaging	0.04	Deleterious
p.Val25Trp	VUS	-2.22294	Neutral	0.6234	Pathogenic	-7.788	Pathogenic	0.287	Neutral	0.992	Probably damaging	0	Deleterious
p.Val25Phe	VUS	-3.12511	Neutral	0.2408	Benign	-7.963	Pathogenic	0.245	Neutral	0.68	Possibly damaging	0.03	Deleterious
p.Glu26Asn	VUS	-1.40929	Neutral	0.3554	Ambiguous	-8.715	Pathogenic	0.271	Neutral	0.054	Benign	0.02	Deleterious
p.Glu26Lys	VUS	-0.438895	Neutral	0.3023	Benign	-7.858	Pathogenic	0.193	Neutral	0.006	Benign	0.04	Deleterious	14.84	Neutral
p.Glu26Thr	VUS	-9.36582	Indeterminate	0.2484	Benign	-6.863	Benign	0.294	Neutral	0.133	Benign	0.01	Deleterious
p.Glu26Arg	VUS	-0.101587	Neutral	0.2163	Benign	-5.097	Benign	0.225	Neutral	0	Benign	0.02	Deleterious
p.Glu26Ser	VUS	-27.3814	Indeterminate	0.2275	Benign	-5.959	Benign	0.309	Neutral	0.011	Benign	0.02	Deleterious
p.Glu26Ile	VUS	-0.521217	Neutral	0.5949	Pathogenic	-10.162	Pathogenic	0.329	Neutral	0.109	Benign	0	Deleterious
p.Glu26Met	VUS	-0.269975	Neutral	0.6984	Pathogenic	-9.891	Pathogenic	0.344	Neutral	0.021	Benign	0	Deleterious
p.Glu26His	VUS	-4.14743	Neutral	0.3936	Ambiguous	-6.683	Benign	0.221	Neutral	0	Benign	0.21	Tolerated
p.Glu26Gln	VUS	-2.57956	Neutral	0.1534	Benign	-5.863	Benign	0.105	Neutral	0	Benign	0.18	Tolerated	11.94	Neutral
p.Glu26Pro	VUS	-0.385668	Neutral	0.3451	Ambiguous	-5.809	Benign	0.373	Neutral	0.207	Benign	0.02	Deleterious
p.Glu26Leu	VUS	-0.531548	Neutral	0.4372	Ambiguous	-6.918	Benign	0.34	Neutral	0.017	Benign	0.01	Deleterious
p.Glu26Asp	VUS	-2.99544	Neutral	0.1188	Benign	-3.773	Benign	0.111	Neutral	0	Benign	0.08	Tolerated	8.36	Neutral
p.Glu26Ala	VUS	-1.96119	Neutral	0.1106	Benign	-4.011	Benign	0.117	Neutral	0.001	Benign	0.03	Deleterious	14.91	Neutral
p.Glu26Gly	VUS	-4.39166	Neutral	0.1345	Benign	-5.023	Benign	0.206	Neutral	0.228	Benign	0.01	Deleterious	19.55	Deleterious
p.Glu26Val	VUS	-0.202733	Neutral	0.3096	Benign	-6.904	Benign	0.284	Neutral	0.009	Benign	0.01	Deleterious	17.11	Deleterious
p.Glu26Tyr	VUS	-5.41735	Neutral	0.7028	Pathogenic	-9.932	Pathogenic	0.321	Neutral	0.257	Benign	0	Deleterious
p.Glu26Cys	VUS	-0.0239291	Neutral	0.8412	Pathogenic	-8.041	Pathogenic	0.333	Neutral	0.996	Probably damaging	0	Deleterious
p.Glu26Trp	VUS	-0.958278	Neutral	0.8423	Pathogenic	-8.768	Pathogenic	0.366	Neutral	0.89	Possibly damaging	0	Deleterious
p.Glu26Phe	VUS	-3.59229	Neutral	0.8086	Pathogenic	-10.05	Pathogenic	0.33	Neutral	0.208	Benign	0	Deleterious
p.Glu27Asn	VUS	-15.325	Indeterminate	0.8108	Pathogenic	-8.824	Pathogenic	0.367	Neutral	0.965	Probably damaging	0.38	Tolerated
p.Glu27Lys	VUS	-0.266931	Neutral	0.6297	Pathogenic	-7.324	Benign	0.18	Neutral	0.656	Possibly damaging	0.74	Tolerated	22.5	Deleterious
p.Glu27Thr	VUS	-27.8084	Indeterminate	0.582	Pathogenic	-5.891	Benign	0.285	Neutral	0.245	Benign	0.47	Tolerated
p.Glu27Arg	VUS	-6.08179	Indeterminate	0.5915	Pathogenic	-4.598	Benign	0.241	Neutral	0.899	Possibly damaging	0.4	Tolerated
p.Glu27Ser	VUS	-4.03712	Neutral	0.6781	Pathogenic	-6.612	Benign	0.421	Neutral	0.907	Possibly damaging	0.56	Tolerated
p.Glu27Ile	VUS	-2.88525	Neutral	0.7775	Pathogenic	-8.884	Pathogenic	0.435	Neutral	0.675	Possibly damaging	0.14	Tolerated
p.Glu27Met	VUS	-2.28413	Neutral	0.8549	Pathogenic	-8.508	Pathogenic	0.347	Neutral	0.737	Possibly damaging	0.13	Tolerated
p.Glu27His	VUS	-4.17288	Neutral	0.7579	Pathogenic	-6.215	Benign	0.397	Neutral	0.993	Probably damaging	0.1	Tolerated
p.Glu27Gln	VUS	-3.16542	Neutral	0.3021	Benign	-4.066	Benign	0.134	Neutral	0.11	Benign	0.53	Tolerated	21	Deleterious
p.Glu27Pro	VUS	-7.44669	Indeterminate	0.9	Pathogenic	-6.854	Benign	0.465	Neutral	0.947	Possibly damaging	0.21	Tolerated
p.Glu27Leu	VUS	-2.13658	Neutral	0.777	Pathogenic	-4.748	Benign	0.308	Neutral	0.009	Benign	0.23	Tolerated
p.Glu27Asp	VUS	-25.5881	Indeterminate	0.3212	Benign	-4.411	Benign	0.115	Neutral	0.006	Benign	0.51	Tolerated	21.8	Deleterious
p.Glu27Ala	VUS	-3.09349	Neutral	0.2891	Benign	-3.863	Benign	0.21	Neutral	0.071	Benign	0.6	Tolerated	21.3	Deleterious
p.Glu27Gly	VUS	-17.8107	Indeterminate	0.6044	Pathogenic	-6.564	Benign	0.236	Neutral	0.98	Probably damaging	0.29	Tolerated	23.1	Deleterious
p.Glu27Val	VUS	-0.710396	Neutral	0.5387	Ambiguous	-5.675	Benign	0.434	Neutral	0.019	Benign	0.3	Tolerated	22.2	Deleterious
p.Glu27Tyr	VUS	-53.1508	Deleterious	0.9134	Pathogenic	-10.091	Pathogenic	0.446	Neutral	0.98	Probably damaging	0.03	Deleterious
p.Glu27Cys	VUS	-18.5062	Indeterminate	0.9673	Pathogenic	-8.403	Pathogenic	0.443	Neutral	1	Probably damaging	0.04	Deleterious
p.Glu27Trp	VUS	-0.306685	Neutral	0.9791	Pathogenic	-9.543	Pathogenic	0.487	Neutral	0.998	Probably damaging	0.01	Deleterious
p.Glu27Phe	VUS	-0.198752	Neutral	0.9594	Pathogenic	-10.441	Pathogenic	0.445	Neutral	0.899	Possibly damaging	0.04	Deleterious
p.Val28Asn	VUS	-53.1508	Deleterious	0.9413	Pathogenic	-17.772	Pathogenic	0.745	Disease	1	Probably damaging	0	Deleterious
p.Val28Lys	VUS	-53.1508	Deleterious	0.9711	Pathogenic	-19.404	Pathogenic	0.777	Disease	1	Probably damaging	0	Deleterious
p.Val28Thr	VUS	-0.157799	Neutral	0.5482	Ambiguous	-7.254	Benign	0.66	Disease	1	Probably damaging	0.01	Deleterious
p.Val28Arg	VUS	-53.1508	Deleterious	0.9327	Pathogenic	-15.395	Pathogenic	0.759	Disease	1	Probably damaging	0	Deleterious
p.Val28Ser	VUS	-1.42759	Neutral	0.8134	Pathogenic	-10.22	Pathogenic	0.701	Disease	1	Probably damaging	0	Deleterious
p.Val28Ile	VUS	-0.171296	Neutral	0.2771	Benign	-8.204	Pathogenic	0.438	Neutral	0.998	Probably damaging	0.05	Deleterious
p.Val28Met	VUS	-0.287958	Neutral	0.7568	Pathogenic	-9.476	Pathogenic	0.62	Disease	1	Probably damaging	0.01	Deleterious	31	Deleterious
p.Val28His	VUS	-53.1508	Deleterious	0.9896	Pathogenic	-16.145	Pathogenic	0.736	Disease	1	Probably damaging	0	Deleterious
p.Val28Gln	VUS	-53.1508	Deleterious	0.9319	Pathogenic	-15.731	Pathogenic	0.76	Disease	1	Probably damaging	0	Deleterious
p.Val28Pro	VUS	-53.1508	Deleterious	0.9875	Pathogenic	-12.886	Pathogenic	0.739	Disease	1	Probably damaging	0	Deleterious
p.Val28Leu	VUS	-0.00262742	Neutral	0.7196	Pathogenic	-7.485	Benign	0.428	Neutral	0.998	Probably damaging	0.2	Tolerated	25.95	Deleterious
p.Val28Asp	VUS	-53.1508	Deleterious	0.9632	Pathogenic	-15.937	Pathogenic	0.809	Disease	1	Probably damaging	0	Deleterious
p.Val28Glu	VUS	-53.1508	Deleterious	0.9105	Pathogenic	-14.493	Pathogenic	0.813	Disease	1	Probably damaging	0	Deleterious	32	Deleterious
p.Val28Ala	VUS	-0.0421431	Neutral	0.4679	Ambiguous	-5.318	Benign	0.559	Disease	1	Probably damaging	0.01	Deleterious	29.6	Deleterious
p.Val28Gly	VUS	-20.3919	Indeterminate	0.57	Pathogenic	-11.969	Pathogenic	0.756	Disease	1	Probably damaging	0	Deleterious	32	Deleterious
p.Val28Tyr	VUS	-53.1508	Deleterious	0.9801	Pathogenic	-16.38	Pathogenic	0.745	Disease	1	Probably damaging	0	Deleterious
p.Val28Cys	VUS	-0.111971	Neutral	0.9384	Pathogenic	-5.736	Benign	0.676	Disease	1	Probably damaging	0	Deleterious
p.Val28Trp	VUS	-53.1508	Deleterious	0.9963	Pathogenic	-15.933	Pathogenic	0.706	Disease	1	Probably damaging	0	Deleterious
p.Val28Phe	VUS	-53.1508	Deleterious	0.8948	Pathogenic	-13.192	Pathogenic	0.772	Disease	1	Probably damaging	0.01	Deleterious
p.Arg29Asn	VUS	-4.64493	Neutral	0.7626	Pathogenic	-10.659	Pathogenic	0.485	Neutral	0.975	Probably damaging	0.03	Deleterious
p.Arg29Lys	VUS	-0.173123	Neutral	0.191	Benign	-7.103	Benign	0.2	Neutral	0.153	Benign	0.3	Tolerated
p.Arg29Thr	VUS	-12.0887	Indeterminate	0.2316	Benign	-6.412	Benign	0.348	Neutral	0.546	Possibly damaging	0.26	Tolerated
p.Arg29Ser	VUS	-0.792923	Neutral	0.4961	Ambiguous	-5.402	Benign	0.461	Neutral	0.988	Probably damaging	0.03	Deleterious
p.Arg29Ile	VUS	-21.2004	Indeterminate	0.335	Benign	-10.023	Pathogenic	0.48	Neutral	0.999	Probably damaging	0.01	Deleterious
p.Arg29Met	VUS	-1.63209	Neutral	0.4175	Ambiguous	-9.569	Pathogenic	0.473	Neutral	0.998	Probably damaging	0.01	Deleterious
p.Arg29His	VUS	-3.49056	Neutral	0.1851	Benign	-8.02	Pathogenic	0.441	Neutral	0.978	Probably damaging	0.02	Deleterious
p.Arg29Gln	VUS	-0.276696	Neutral	0.1091	Benign	-5.715	Benign	0.181	Neutral	0.79	Possibly damaging	0.06	Tolerated	22.7	Deleterious
p.Arg29Pro	VUS	-53.1508	Deleterious	0.929	Pathogenic	-11.125	Pathogenic	0.586	Disease	1	Probably damaging	0.02	Deleterious	26.1	Deleterious
p.Arg29Leu	VUS	-0.877085	Neutral	0.1876	Benign	-7.705	Pathogenic	0.284	Neutral	0.997	Probably damaging	0.03	Deleterious	25.3	Deleterious
p.Arg29Asp	VUS	-18.6707	Indeterminate	0.7182	Pathogenic	-9.115	Pathogenic	0.541	Disease	0.994	Probably damaging	0.01	Deleterious
p.Arg29Glu	VUS	-4.91564	Neutral	0.2562	Benign	-5.391	Benign	0.284	Neutral	0.312	Benign	0.04	Deleterious
p.Arg29Ala	VUS	-0.00771264	Neutral	0.2363	Benign	-2.966	Benign	0.452	Neutral	0.941	Possibly damaging	0.03	Deleterious
p.Arg29Gly	VUS	-1.75726	Neutral	0.2867	Benign	-5.631	Benign	0.458	Neutral	0.808	Possibly damaging	0.02	Deleterious	25.4	Deleterious
p.Arg29Val	VUS	-1.92196	Neutral	0.2848	Benign	-7.2	Benign	0.495	Neutral	0.998	Probably damaging	0.02	Deleterious
p.Arg29Tyr	VUS	-0.272108	Neutral	0.5312	Ambiguous	-11.002	Pathogenic	0.452	Neutral	0.959	Probably damaging	0.01	Deleterious
p.Arg29Cys	VUS	-0.990231	Neutral	0.3189	Benign	-7.401	Benign	0.469	Neutral	1	Probably damaging	0	Deleterious
p.Arg29Trp	VUS	-0.906958	Neutral	0.262	Benign	-8.981	Pathogenic	0.464	Neutral	0.999	Probably damaging	0	Deleterious	32	Deleterious
p.Arg29Phe	VUS	-3.19442	Neutral	0.5847	Pathogenic	-10.677	Pathogenic	0.479	Neutral	0.959	Probably damaging	0.01	Deleterious
p.Ala30Asn	VUS	-53.1508	Deleterious	0.2215	Benign	-8.711	Pathogenic	0.349	Neutral	0.086	Benign	0.41	Tolerated
p.Ala30Lys	VUS	-1.25272	Neutral	0.2472	Benign	-6.24	Benign	0.355	Neutral	0.601	Possibly damaging	0.5	Tolerated
p.Ala30Thr	VUS	-23.9587	Indeterminate	0.1066	Benign	-6.59	Benign	0.237	Neutral	0.015	Benign	0.51	Tolerated	20.3	Deleterious
p.Ala30Arg	VUS	-3.40024	Neutral	0.1463	Benign	-3.24	Benign	0.335	Neutral	0.841	Possibly damaging	0.47	Tolerated
p.Ala30Ser	VUS	-11.0629	Indeterminate	0.1102	Benign	-5.065	Benign	0.26	Neutral	0.001	Benign	0.56	Tolerated	18.06	Deleterious
p.Ala30Ile	VUS	-10.0163	Indeterminate	0.2831	Benign	-8.885	Pathogenic	0.472	Neutral	0.601	Possibly damaging	0.43	Tolerated
p.Ala30Met	VUS	-5.52032	Neutral	0.2343	Benign	-8.27	Pathogenic	0.336	Neutral	0.383	Benign	0.24	Tolerated
p.Ala30His	VUS	-6.94216	Indeterminate	0.2277	Benign	-7.132	Benign	0.441	Neutral	0.955	Possibly damaging	0.56	Tolerated
p.Ala30Gln	VUS	-11.5339	Indeterminate	0.1304	Benign	-5.043	Benign	0.299	Neutral	0.085	Benign	0.42	Tolerated
p.Ala30Pro	VUS	-53.1508	Deleterious	0.7136	Pathogenic	-8.705	Pathogenic	0.527	Disease	0.812	Possibly damaging	0.26	Tolerated	23.1	Deleterious
p.Ala30Leu	VUS	-9.7447	Indeterminate	0.1437	Benign	-5.945	Benign	0.293	Neutral	0.039	Benign	0.71	Tolerated
p.Ala30Asp	VUS	-33.2187	Indeterminate	0.1445	Benign	-6.669	Benign	0.334	Neutral	0.011	Benign	0.34	Tolerated
p.Ala30Glu	VUS	-2.24115	Neutral	0.0953	Benign	-4.641	Benign	0.274	Neutral	0.007	Benign	0.49	Tolerated	14.41	Neutral
p.Ala30Gly	VUS	-53.1508	Deleterious	0.1178	Benign	-5.146	Benign	0.362	Neutral	0.007	Benign	0.41	Tolerated	17.42	Deleterious
p.Ala30Val	VUS	-7.22425	Indeterminate	0.1334	Benign	-6.659	Benign	0.353	Neutral	0.827	Possibly damaging	0.56	Tolerated	17.56	Deleterious
p.Ala30Tyr	VUS	-25.6147	Indeterminate	0.3408	Ambiguous	-9.698	Pathogenic	0.451	Neutral	0.985	Probably damaging	1	Tolerated
p.Ala30Cys	VUS	-21.5447	Indeterminate	0.4009	Ambiguous	-7.392	Benign	0.416	Neutral	0.985	Probably damaging	0.19	Tolerated
p.Ala30Trp	VUS	-14.3099	Indeterminate	0.4175	Ambiguous	-8.023	Pathogenic	0.518	Disease	0.996	Probably damaging	0.19	Tolerated
p.Ala30Phe	VUS	-9.79596	Indeterminate	0.2629	Benign	-8.948	Pathogenic	0.462	Neutral	0.955	Possibly damaging	0.7	Tolerated
p.Leu31Asn	VUS	-15.7998	Indeterminate	0.8943	Pathogenic	-12.265	Pathogenic	0.738	Disease	1	Probably damaging	0	Deleterious
p.Leu31Lys	VUS	-1.83865	Neutral	0.6424	Pathogenic	-10.832	Pathogenic	0.757	Disease	0.995	Probably damaging	0	Deleterious
p.Leu31Thr	VUS	-7.23277	Indeterminate	0.7298	Pathogenic	-8.944	Pathogenic	0.722	Disease	1	Probably damaging	0	Deleterious
p.Leu31Arg	VUS	-3.30787	Neutral	0.3758	Ambiguous	-6.011	Benign	0.843	Disease	1	Probably damaging	0	Deleterious	31	Deleterious
p.Leu31Ser	VUS	-12.3566	Indeterminate	0.8197	Pathogenic	-6.814	Benign	0.823	Disease	1	Probably damaging	0	Deleterious
p.Leu31Ile	VUS	-1.35797	Neutral	0.3859	Ambiguous	-8.782	Pathogenic	0.532	Disease	0.999	Probably damaging	0.04	Deleterious
p.Leu31Met	VUS	-6.94652	Indeterminate	0.3112	Benign	-6.603	Benign	0.538	Disease	1	Probably damaging	0.02	Deleterious	28.9	Deleterious
p.Leu31His	VUS	-5.62474	Neutral	0.5671	Pathogenic	-5.442	Benign	0.824	Disease	1	Probably damaging	0	Deleterious
p.Leu31Gln	VUS	-18.9814	Indeterminate	0.4554	Ambiguous	-6.921	Benign	0.828	Disease	1	Probably damaging	0	Deleterious	30	Deleterious
p.Leu31Pro	VUS	-53.1508	Deleterious	0.9258	Pathogenic	-12.464	Pathogenic	0.713	Disease	1	Probably damaging	0	Deleterious	31	Deleterious
p.Leu31Asp	VUS	-53.1508	Deleterious	0.9567	Pathogenic	-11.701	Pathogenic	0.731	Disease	1	Probably damaging	0	Deleterious
p.Leu31Glu	VUS	-9.75547	Indeterminate	0.7905	Pathogenic	-7.46	Benign	0.763	Disease	1	Probably damaging	0	Deleterious
p.Leu31Ala	VUS	-9.64502	Indeterminate	0.447	Ambiguous	-2.526	Benign	0.703	Disease	1	Probably damaging	0.01	Deleterious
p.Leu31Gly	VUS	-6.61524	Indeterminate	0.7501	Pathogenic	-8.195	Pathogenic	0.748	Disease	1	Probably damaging	0	Deleterious
p.Leu31Val	VUS	-21.4293	Indeterminate	0.3177	Benign	-6.653	Benign	0.438	Neutral	0.997	Probably damaging	0.02	Deleterious	28.5	Deleterious
p.Leu31Tyr	VUS	-21.2113	Indeterminate	0.6131	Pathogenic	-6.763	Benign	0.705	Disease	0.997	Probably damaging	0.01	Deleterious
p.Leu31Cys	VUS	-33.1988	Indeterminate	0.7024	Pathogenic	-4.191	Benign	0.659	Disease	1	Probably damaging	0	Deleterious
p.Leu31Trp	VUS	-18.5468	Indeterminate	0.5192	Ambiguous	-6.829	Benign	0.756	Disease	1	Probably damaging	0	Deleterious
p.Leu31Phe	VUS	-5.12571	Neutral	0.3289	Benign	-6.423	Benign	0.543	Disease	1	Probably damaging	0.18	Tolerated
p.Leu32Asn	VUS	-53.1508	Deleterious	0.9879	Pathogenic	-19.156	Pathogenic	0.717	Disease	1	Probably damaging	0	Deleterious
p.Leu32Lys	VUS	-53.1508	Deleterious	0.9561	Pathogenic	-18.462	Pathogenic	0.724	Disease	0.995	Probably damaging	0	Deleterious
p.Leu32Thr	VUS	-15.9483	Indeterminate	0.8634	Pathogenic	-14.454	Pathogenic	0.722	Disease	1	Probably damaging	0	Deleterious
p.Leu32Arg	VUS	-53.1508	Deleterious	0.8215	Pathogenic	-13.759	Pathogenic	0.752	Disease	1	Probably damaging	0	Deleterious	32	Deleterious
p.Leu32Ser	VUS	-32.5341	Indeterminate	0.9828	Pathogenic	-14.347	Pathogenic	0.817	Disease	1	Probably damaging	0	Deleterious
p.Leu32Ile	VUS	-0.057706	Neutral	0.256	Benign	-10.707	Pathogenic	0.457	Neutral	0.999	Probably damaging	0	Deleterious
p.Leu32Met	VUS	-0.107049	Neutral	0.6061	Pathogenic	-10.797	Pathogenic	0.465	Neutral	1	Probably damaging	0	Deleterious	29	Deleterious
p.Leu32His	VUS	-53.1508	Deleterious	0.9762	Pathogenic	-15.473	Pathogenic	0.791	Disease	1	Probably damaging	0	Deleterious
p.Leu32Gln	VUS	-10.6642	Indeterminate	0.9367	Pathogenic	-15.083	Pathogenic	0.821	Disease	1	Probably damaging	0	Deleterious	29.9	Deleterious
p.Leu32Pro	Pathogenic	-53.1508	Deleterious	0.9446	Pathogenic	-13.128	Pathogenic	0.796	Disease	1	Probably damaging	0	Deleterious	31	Deleterious
p.Leu32Asp	VUS	-53.1508	Deleterious	0.9957	Pathogenic	-18.426	Pathogenic	0.722	Disease	1	Probably damaging	0	Deleterious
p.Leu32Glu	VUS	-53.1508	Deleterious	0.9666	Pathogenic	-17.68	Pathogenic	0.75	Disease	1	Probably damaging	0	Deleterious
p.Leu32Ala	VUS	-18.6099	Indeterminate	0.8518	Pathogenic	-14.078	Pathogenic	0.698	Disease	1	Probably damaging	0	Deleterious
p.Leu32Gly	VUS	-53.1508	Deleterious	0.9602	Pathogenic	-15.951	Pathogenic	0.71	Disease	1	Probably damaging	0	Deleterious
p.Leu32Val	VUS	-0.0460121	Neutral	0.3013	Benign	-11.514	Pathogenic	0.434	Neutral	0.997	Probably damaging	0	Deleterious	28.6	Deleterious
p.Leu32Tyr	VUS	-53.1508	Deleterious	0.9847	Pathogenic	-15.884	Pathogenic	0.696	Disease	0.997	Probably damaging	0	Deleterious
p.Leu32Cys	VUS	-3.17708	Neutral	0.9346	Pathogenic	-11.444	Pathogenic	0.645	Disease	1	Probably damaging	0	Deleterious
p.Leu32Trp	VUS	-53.1508	Deleterious	0.9562	Pathogenic	-14.683	Pathogenic	0.736	Disease	1	Probably damaging	0	Deleterious
p.Leu32Phe	VUS	-5.09041	Neutral	0.8974	Pathogenic	-9.809	Pathogenic	0.521	Disease	1	Probably damaging	0	Deleterious
p.Glu33Asn	VUS	-0.119444	Neutral	0.4922	Ambiguous	-8.592	Pathogenic	0.263	Neutral	0.973	Probably damaging	0.06	Tolerated
p.Glu33Lys	VUS	-0.409975	Neutral	0.2662	Benign	-7.435	Benign	0.169	Neutral	0.816	Possibly damaging	0.56	Tolerated	22.2	Deleterious
p.Glu33Thr	VUS	-0.191789	Neutral	0.3245	Benign	-7.163	Benign	0.377	Neutral	0.99	Probably damaging	0.06	Tolerated
p.Glu33Arg	VUS	-9.23679	Indeterminate	0.1813	Benign	-5.526	Benign	0.271	Neutral	0.976	Probably damaging	0.46	Tolerated
p.Glu33Ser	VUS	-3.58502	Neutral	0.2948	Benign	-6.083	Benign	0.366	Neutral	0.989	Probably damaging	0.06	Tolerated
p.Glu33Ile	VUS	-0.0131041	Neutral	0.6202	Pathogenic	-10.004	Pathogenic	0.376	Neutral	0.992	Probably damaging	0.02	Deleterious
p.Glu33Met	VUS	-0.0106857	Neutral	0.6565	Pathogenic	-9.138	Pathogenic	0.442	Neutral	0.988	Probably damaging	0.02	Deleterious
p.Glu33His	VUS	-0.178646	Neutral	0.3876	Ambiguous	-7.309	Benign	0.312	Neutral	0.983	Probably damaging	0.25	Tolerated
p.Glu33Gln	VUS	-0.0922979	Neutral	0.1304	Benign	-5.184	Benign	0.155	Neutral	0.197	Benign	0.38	Tolerated	15.26	Deleterious
p.Glu33Pro	VUS	-0.0351097	Neutral	0.9028	Pathogenic	-10.541	Pathogenic	0.425	Neutral	0.996	Probably damaging	0.04	Deleterious
p.Glu33Leu	VUS	-0.822413	Neutral	0.3512	Ambiguous	-6.177	Benign	0.279	Neutral	0.951	Possibly damaging	0.05	Deleterious
p.Glu33Asp	VUS	-0.150919	Neutral	0.2215	Benign	-4.304	Benign	0.169	Neutral	0.027	Benign	0.05	Deleterious	14.99	Neutral
p.Glu33Ala	VUS	-11.393	Indeterminate	0.1146	Benign	-3.901	Benign	0.207	Neutral	0.964	Probably damaging	0.07	Tolerated	19.25	Deleterious
p.Glu33Gly	VUS	-0.321211	Neutral	0.1955	Benign	-6.076	Benign	0.213	Neutral	0.996	Probably damaging	0.04	Deleterious	23.5	Deleterious
p.Glu33Val	VUS	-1.43684	Neutral	0.3459	Ambiguous	-7.674	Pathogenic	0.233	Neutral	0.954	Possibly damaging	0.03	Deleterious	23.1	Deleterious
p.Glu33Tyr	VUS	-9.22089	Indeterminate	0.7106	Pathogenic	-10.6	Pathogenic	0.375	Neutral	0.999	Probably damaging	0.02	Deleterious
p.Glu33Cys	VUS	-3.97418	Neutral	0.8469	Pathogenic	-8.408	Pathogenic	0.382	Neutral	1	Probably damaging	0.01	Deleterious
p.Glu33Trp	VUS	-0.262531	Neutral	0.8764	Pathogenic	-10.04	Pathogenic	0.448	Neutral	1	Probably damaging	0.01	Deleterious
p.Glu33Phe	VUS	-3.57999	Neutral	0.7972	Pathogenic	-10.773	Pathogenic	0.389	Neutral	0.996	Probably damaging	0.01	Deleterious
p.Ala34Asn	VUS	-11.5121	Indeterminate	0.275	Benign	-8.006	Pathogenic	0.322	Neutral	0.991	Probably damaging	0.45	Tolerated
p.Ala34Lys	VUS	-1.08043	Neutral	0.3383	Benign	-6.897	Benign	0.447	Neutral	1	Probably damaging	0.57	Tolerated
p.Ala34Thr	VUS	-5.63493	Neutral	0.1519	Benign	-7.778	Pathogenic	0.309	Neutral	0.993	Probably damaging	0.57	Tolerated	20.5	Deleterious
p.Ala34Arg	VUS	-0.00630926	Neutral	0.2107	Benign	-3.952	Benign	0.321	Neutral	1	Probably damaging	0.51	Tolerated
p.Ala34Ser	VUS	-2.77086	Neutral	0.1039	Benign	-5.609	Benign	0.214	Neutral	0.939	Possibly damaging	0.62	Tolerated	18.38	Deleterious
p.Ala34Ile	VUS	-0.96549	Neutral	0.4646	Ambiguous	-11.264	Pathogenic	0.444	Neutral	1	Probably damaging	0.45	Tolerated
p.Ala34Met	VUS	-0.414061	Neutral	0.3905	Ambiguous	-9.665	Pathogenic	0.421	Neutral	1	Probably damaging	0.25	Tolerated
p.Ala34His	VUS	-0.113301	Neutral	0.3442	Ambiguous	-6.915	Benign	0.458	Neutral	1	Probably damaging	0.57	Tolerated
p.Ala34Gln	VUS	-1.74948	Neutral	0.1966	Benign	-4.525	Benign	0.339	Neutral	1	Probably damaging	0.46	Tolerated
p.Ala34Pro	VUS	-11.8892	Indeterminate	0.8853	Pathogenic	-10.719	Pathogenic	0.553	Disease	0.999	Probably damaging	0.29	Tolerated	23.1	Deleterious
p.Ala34Leu	VUS	-0.397769	Neutral	0.2923	Benign	-7.008	Benign	0.439	Neutral	0.999	Probably damaging	0.75	Tolerated
p.Ala34Asp	VUS	-1.5425	Neutral	0.1828	Benign	-5.861	Benign	0.328	Neutral	0.999	Probably damaging	0.38	Tolerated
p.Ala34Glu	VUS	-2.19063	Neutral	0.167	Benign	-4.975	Benign	0.314	Neutral	1	Probably damaging	0.54	Tolerated	18.56	Deleterious
p.Ala34Gly	VUS	-2.72003	Neutral	0.1321	Benign	-4.752	Benign	0.226	Neutral	0.999	Probably damaging	0.45	Tolerated	22.6	Deleterious
p.Ala34Val	VUS	-12.2757	Indeterminate	0.2212	Benign	-8.467	Pathogenic	0.232	Neutral	0.999	Probably damaging	0.59	Tolerated	21.9	Deleterious
p.Ala34Tyr	VUS	-0.233242	Neutral	0.5224	Ambiguous	-10.872	Pathogenic	0.441	Neutral	1	Probably damaging	1	Tolerated
p.Ala34Cys	VUS	-0.282281	Neutral	0.562	Ambiguous	-8.025	Pathogenic	0.414	Neutral	1	Probably damaging	0.19	Tolerated
p.Ala34Trp	VUS	-1.46703	Neutral	0.6783	Pathogenic	-10.098	Pathogenic	0.466	Neutral	1	Probably damaging	0.19	Tolerated
p.Ala34Phe	VUS	-0.109916	Neutral	0.483	Ambiguous	-11.455	Pathogenic	0.419	Neutral	1	Probably damaging	0.71	Tolerated
p.Gly35Asn	VUS	-7.34284	Indeterminate	0.6621	Pathogenic	-12.615	Pathogenic	0.488	Neutral	1	Probably damaging	0.49	Tolerated
p.Gly35Lys	VUS	-13.2454	Indeterminate	0.6573	Pathogenic	-13.142	Pathogenic	0.648	Disease	1	Probably damaging	0.33	Tolerated
p.Gly35Thr	VUS	-53.1508	Deleterious	0.6714	Pathogenic	-13.851	Pathogenic	0.622	Disease	1	Probably damaging	0.08	Tolerated
p.Gly35Arg	VUS	-2.41954	Neutral	0.4978	Ambiguous	-10.238	Pathogenic	0.676	Disease	1	Probably damaging	0.09	Tolerated	27.55	Deleterious
p.Gly35Ser	VUS	-13.9022	Indeterminate	0.3827	Ambiguous	-11.387	Pathogenic	0.619	Disease	1	Probably damaging	0.16	Tolerated
p.Gly35Ile	VUS	-53.1508	Deleterious	0.9411	Pathogenic	-17.954	Pathogenic	0.653	Disease	1	Probably damaging	0.01	Deleterious
p.Gly35Met	VUS	-21.3131	Indeterminate	0.936	Pathogenic	-15.804	Pathogenic	0.667	Disease	1	Probably damaging	0.01	Deleterious
p.Gly35His	VUS	-2.70779	Neutral	0.6966	Pathogenic	-12.455	Pathogenic	0.633	Disease	1	Probably damaging	0.06	Tolerated
p.Gly35Gln	VUS	-9.21734	Indeterminate	0.6005	Pathogenic	-12.674	Pathogenic	0.478	Neutral	1	Probably damaging	0.09	Tolerated
p.Gly35Pro	VUS	-53.1508	Deleterious	0.9693	Pathogenic	-14.731	Pathogenic	0.612	Disease	1	Probably damaging	0.06	Tolerated
p.Gly35Leu	VUS	-53.1508	Deleterious	0.9122	Pathogenic	-14.523	Pathogenic	0.668	Disease	1	Probably damaging	0.03	Deleterious
p.Gly35Asp	VUS	-17.2099	Indeterminate	0.4675	Ambiguous	-11.444	Pathogenic	0.7	Disease	1	Probably damaging	0.28	Tolerated
p.Gly35Glu	VUS	-10.4093	Indeterminate	0.5927	Pathogenic	-12.249	Pathogenic	0.713	Disease	1	Probably damaging	0.31	Tolerated	26.5	Deleterious
p.Gly35Ala	VUS	-7.54972	Indeterminate	0.483	Ambiguous	-11.438	Pathogenic	0.619	Disease	0.999	Probably damaging	0.09	Tolerated	25.7	Deleterious
p.Gly35Val	VUS	-53.1508	Deleterious	0.8532	Pathogenic	-14.011	Pathogenic	0.784	Disease	1	Probably damaging	0.02	Deleterious	31	Deleterious
p.Gly35Tyr	VUS	-26.2764	Indeterminate	0.8898	Pathogenic	-15.993	Pathogenic	0.66	Disease	1	Probably damaging	0.03	Deleterious
p.Gly35Cys	VUS	-12.6201	Indeterminate	0.7264	Pathogenic	-12.778	Pathogenic	0.748	Disease	1	Probably damaging	0.01	Deleterious
p.Gly35Trp	VUS	-53.1508	Deleterious	0.8878	Pathogenic	-14.67	Pathogenic	0.698	Disease	1	Probably damaging	0.01	Deleterious	32	Deleterious
p.Gly35Phe	VUS	-8.93226	Indeterminate	0.9481	Pathogenic	-16.857	Pathogenic	0.669	Disease	1	Probably damaging	0.01	Deleterious
p.Ala36Asn	VUS	-21.286	Indeterminate	0.4997	Ambiguous	-11.256	Pathogenic	0.441	Neutral	0.546	Possibly damaging	0.02	Deleterious
p.Ala36Lys	VUS	-53.1508	Deleterious	0.7005	Pathogenic	-10.584	Pathogenic	0.485	Neutral	0.975	Probably damaging	0.03	Deleterious
p.Ala36Thr	VUS	-15.5652	Indeterminate	0.1621	Benign	-5.216	Benign	0.2	Neutral	0.019	Benign	0.2	Tolerated	22.7	Deleterious
p.Ala36Arg	VUS	-0.86456	Neutral	0.4371	Ambiguous	-7.928	Pathogenic	0.443	Neutral	0.975	Probably damaging	0.02	Deleterious
p.Ala36Ser	VUS	-3.1573	Neutral	0.1364	Benign	-6.935	Benign	0.338	Neutral	0.076	Benign	0.04	Deleterious	23.7	Deleterious
p.Ala36Ile	VUS	-0.136039	Neutral	0.3407	Ambiguous	-8.065	Pathogenic	0.453	Neutral	0.846	Possibly damaging	0.22	Tolerated
p.Ala36Met	VUS	0	Neutral	0.3645	Ambiguous	-6.874	Benign	0.306	Neutral	0.987	Probably damaging	0.05	Deleterious
p.Ala36His	VUS	-0.0227777	Neutral	0.4481	Ambiguous	-7.599	Pathogenic	0.432	Neutral	0.999	Probably damaging	0.01	Deleterious
p.Ala36Gln	VUS	-0.0688498	Neutral	0.3982	Ambiguous	-5.702	Benign	0.436	Neutral	0.987	Probably damaging	0.02	Deleterious
p.Ala36Pro	VUS	-53.1508	Deleterious	0.7831	Pathogenic	-11.456	Pathogenic	0.588	Disease	0.94	Possibly damaging	0.05	Deleterious	26.2	Deleterious
p.Ala36Leu	VUS	-5.93515	Indeterminate	0.2434	Benign	-5.751	Benign	0.47	Neutral	0.846	Possibly damaging	0.29	Tolerated
p.Ala36Asp	VUS	-3.53591	Neutral	0.5068	Ambiguous	-9.063	Pathogenic	0.516	Disease	0.911	Possibly damaging	0.01	Deleterious
p.Ala36Glu	VUS	-6.7161	Indeterminate	0.4466	Ambiguous	-5.035	Benign	0.457	Neutral	0.965	Probably damaging	0.03	Deleterious	21.6	Deleterious
p.Ala36Gly	VUS	-11.4589	Indeterminate	0.2002	Benign	-7.887	Pathogenic	0.321	Neutral	0.886	Possibly damaging	0.01	Deleterious	22.4	Deleterious
p.Ala36Val	VUS	-0.0639582	Neutral	0.1435	Benign	-3.714	Benign	0.176	Neutral	0.052	Benign	1	Tolerated	15.3	Deleterious
p.Ala36Tyr	VUS	-4.78252	Neutral	0.4751	Ambiguous	-9.387	Pathogenic	0.428	Neutral	0.987	Probably damaging	0.01	Deleterious
p.Ala36Cys	VUS	0	Neutral	0.3531	Ambiguous	-6.444	Benign	0.421	Neutral	0.996	Probably damaging	0.04	Deleterious
p.Ala36Trp	VUS	-0.000283131	Neutral	0.6743	Pathogenic	-8.052	Pathogenic	0.519	Disease	0.999	Probably damaging	0	Deleterious
p.Ala36Phe	VUS	-2.38873	Neutral	0.3369	Benign	-8.997	Pathogenic	0.452	Neutral	0.975	Probably damaging	0.03	Deleterious
p.Leu37Asn	VUS	-0.0747782	Neutral	0.1197	Benign	-0.158	Benign	0.203	Neutral	0.08	Benign	0.53	Tolerated
p.Leu37Lys	VUS	-8.19626	Indeterminate	0.1038	Benign	-5.179	Benign	0.271	Neutral	0.08	Benign	0.86	Tolerated
p.Leu37Thr	VUS	-15.4269	Indeterminate	0.1027	Benign	-4.137	Benign	0.24	Neutral	0.019	Benign	0.54	Tolerated
p.Leu37Arg	VUS	-2.02138e-05	Neutral	0.0572	Benign	-3.63	Benign	0.119	Neutral	0.137	Benign	0.48	Tolerated	13.65	Neutral
p.Leu37Ser	VUS	-3.05179	Neutral	0.0723	Benign	0.968	Benign	0.12	Neutral	0	Benign	0.76	Tolerated
p.Leu37Ile	VUS	-15.631	Indeterminate	0.1386	Benign	-6.987	Benign	0.184	Neutral	0.15	Benign	0.18	Tolerated
p.Leu37Met	VUS	-0.0165841	Neutral	0.1321	Benign	-6.506	Benign	0.202	Neutral	0.775	Possibly damaging	0.1	Tolerated	13.49	Neutral
p.Leu37His	VUS	-8.27189	Indeterminate	0.0924	Benign	-2.66	Benign	0.128	Neutral	0.82	Possibly damaging	0.13	Tolerated
p.Leu37Gln	VUS	-9.51412	Indeterminate	0.0564	Benign	-3.344	Benign	0.11	Neutral	0.137	Benign	0.55	Tolerated	12.85	Neutral
p.Leu37Pro	VUS	-27.6682	Indeterminate	0.0683	Benign	-0.359	Benign	0.117	Neutral	0	Benign	0.26	Tolerated	14.31	Neutral
p.Leu37Asp	VUS	-2.3372	Neutral	0.1044	Benign	3.181	Benign	0.214	Neutral	0	Benign	0.68	Tolerated
p.Leu37Glu	VUS	-2.5701	Neutral	0.0784	Benign	-0.455	Benign	0.288	Neutral	0.019	Benign	1	Tolerated
p.Leu37Ala	VUS	-0.142759	Neutral	0.0689	Benign	-1.698	Benign	0.195	Neutral	0.008	Benign	0.71	Tolerated
p.Leu37Gly	VUS	-2.02986	Neutral	0.2015	Benign	-2.306	Benign	0.27	Neutral	0.019	Benign	0.36	Tolerated
p.Leu37Val	VUS	-9.83247	Indeterminate	0.076	Benign	-4.47	Benign	0.126	Neutral	0.061	Benign	0.31	Tolerated	10.87	Neutral
p.Leu37Tyr	VUS	-8.27794	Indeterminate	0.2359	Benign	-5.786	Benign	0.249	Neutral	0.82	Possibly damaging	0.06	Tolerated
p.Leu37Cys	VUS	-0.847029	Neutral	0.326	Benign	-2.31	Benign	0.256	Neutral	0.82	Possibly damaging	0.05	Deleterious
p.Leu37Trp	VUS	-53.1508	Deleterious	0.1527	Benign	-5.764	Benign	0.25	Neutral	0.945	Possibly damaging	0.02	Deleterious
p.Leu37Phe	VUS	-0.243206	Neutral	0.1341	Benign	-5.889	Benign	0.101	Neutral	0.299	Benign	0.06	Tolerated
p.Pro38Asn	VUS	-53.1508	Deleterious	0.9812	Pathogenic	-17.825	Pathogenic	0.467	Neutral	0.966	Probably damaging	0.03	Deleterious
p.Pro38Lys	VUS	-53.1508	Deleterious	0.9373	Pathogenic	-15.623	Pathogenic	0.527	Disease	0.991	Probably damaging	0.06	Tolerated
p.Pro38Thr	VUS	-6.11512	Indeterminate	0.6142	Pathogenic	-11.081	Pathogenic	0.396	Neutral	0.749	Possibly damaging	0.25	Tolerated	20.6	Deleterious
p.Pro38Arg	VUS	-53.1508	Deleterious	0.7822	Pathogenic	-13.173	Pathogenic	0.575	Disease	0.994	Probably damaging	0.04	Deleterious	24.3	Deleterious
p.Pro38Ser	VUS	-17.3321	Indeterminate	0.7699	Pathogenic	-11.061	Pathogenic	0.591	Disease	0.949	Possibly damaging	0.07	Tolerated	17.36	Deleterious
p.Pro38Ile	VUS	-18.0889	Indeterminate	0.7013	Pathogenic	-12.161	Pathogenic	0.466	Neutral	0.991	Probably damaging	0.61	Tolerated
p.Pro38Met	VUS	-27.7027	Indeterminate	0.9268	Pathogenic	-14.329	Pathogenic	0.468	Neutral	0.999	Probably damaging	0.1	Tolerated
p.Pro38His	VUS	-53.1508	Deleterious	0.9314	Pathogenic	-14.311	Pathogenic	0.461	Neutral	0.999	Probably damaging	0.02	Deleterious	24.6	Deleterious
p.Pro38Gln	VUS	-53.1508	Deleterious	0.8702	Pathogenic	-14.749	Pathogenic	0.443	Neutral	0.988	Probably damaging	0.04	Deleterious
p.Pro38Leu	VUS	-33.2193	Indeterminate	0.6615	Pathogenic	-11.985	Pathogenic	0.418	Neutral	0.977	Probably damaging	0.39	Tolerated	24.5	Deleterious
p.Pro38Asp	VUS	-53.1508	Deleterious	0.9831	Pathogenic	-16.694	Pathogenic	0.495	Neutral	0.961	Probably damaging	0.02	Deleterious
p.Pro38Glu	VUS	-25.6817	Indeterminate	0.9228	Pathogenic	-14.431	Pathogenic	0.471	Neutral	0.778	Possibly damaging	0.06	Tolerated
p.Pro38Ala	VUS	-53.1508	Deleterious	0.297	Benign	-6.83	Benign	0.185	Neutral	0.033	Benign	0.37	Tolerated	15.27	Deleterious
p.Pro38Gly	VUS	-0.71356	Neutral	0.8417	Pathogenic	-11.375	Pathogenic	0.462	Neutral	0.947	Possibly damaging	0.02	Deleterious
p.Pro38Val	VUS	-0.533644	Neutral	0.3993	Ambiguous	-7.821	Pathogenic	0.284	Neutral	0.736	Possibly damaging	1	Tolerated
p.Pro38Tyr	VUS	-53.1508	Deleterious	0.9766	Pathogenic	-16.852	Pathogenic	0.48	Neutral	1	Probably damaging	0.02	Deleterious
p.Pro38Cys	VUS	-0.0422128	Neutral	0.8647	Pathogenic	-11.249	Pathogenic	0.472	Neutral	1	Probably damaging	0.07	Tolerated
p.Pro38Trp	VUS	-53.1508	Deleterious	0.9811	Pathogenic	-16.362	Pathogenic	0.531	Disease	1	Probably damaging	0.01	Deleterious
p.Pro38Phe	VUS	-53.1508	Deleterious	0.9761	Pathogenic	-16.359	Pathogenic	0.475	Neutral	0.999	Probably damaging	0.07	Tolerated
p.Asn39Lys	VUS	-22.9399	Indeterminate	0.9206	Pathogenic	-10.769	Pathogenic	0.564	Disease	0.974	Probably damaging	0.02	Deleterious	22.45	Deleterious
p.Asn39Thr	VUS	-0.0128986	Neutral	0.479	Ambiguous	-7.191	Benign	0.472	Neutral	0.647	Possibly damaging	0.01	Deleterious	23.9	Deleterious
p.Asn39Arg	VUS	-3.95388	Neutral	0.8501	Pathogenic	-8.016	Pathogenic	0.516	Disease	0.993	Probably damaging	0.01	Deleterious
p.Asn39Ser	VUS	-4.05184	Neutral	0.1805	Benign	-5.654	Benign	0.637	Disease	0.945	Possibly damaging	0.03	Deleterious	22.2	Deleterious
p.Asn39Ile	VUS	-7.94561	Indeterminate	0.9261	Pathogenic	-10.345	Pathogenic	0.68	Disease	0.975	Probably damaging	0	Deleterious	24.7	Deleterious
p.Asn39Met	VUS	-25.1993	Indeterminate	0.8921	Pathogenic	-9.609	Pathogenic	0.61	Disease	0.998	Probably damaging	0	Deleterious
p.Asn39His	VUS	-0.0271885	Neutral	0.4608	Ambiguous	-7.721	Pathogenic	0.361	Neutral	0.992	Probably damaging	0.01	Deleterious	16.04	Deleterious
p.Asn39Gln	VUS	-1.23834	Neutral	0.7922	Pathogenic	-8.553	Pathogenic	0.518	Disease	0.981	Probably damaging	0.01	Deleterious
p.Asn39Pro	VUS	-53.1508	Deleterious	0.9481	Pathogenic	-11.481	Pathogenic	0.528	Disease	0.994	Probably damaging	0.01	Deleterious
p.Asn39Leu	VUS	-53.1508	Deleterious	0.7873	Pathogenic	-8.938	Pathogenic	0.596	Disease	0.981	Probably damaging	0	Deleterious
p.Asn39Asp	VUS	-0.65875	Neutral	0.171	Benign	-4.011	Benign	0.264	Neutral	0.05	Benign	0.62	Tolerated	12.26	Neutral
p.Asn39Glu	VUS	-1.56112	Neutral	0.7546	Pathogenic	-5.999	Benign	0.507	Disease	0.723	Possibly damaging	0.02	Deleterious
p.Asn39Ala	VUS	-6.59708	Indeterminate	0.6305	Pathogenic	-6.351	Benign	0.497	Neutral	0.739	Possibly damaging	0.01	Deleterious
p.Asn39Gly	VUS	-0.341691	Neutral	0.5207	Ambiguous	-6.752	Benign	0.504	Disease	0.987	Probably damaging	0.04	Deleterious
p.Asn39Val	VUS	-4.57524	Neutral	0.8577	Pathogenic	-7.981	Pathogenic	0.591	Disease	0.813	Possibly damaging	0	Deleterious
p.Asn39Tyr	VUS	-0.720898	Neutral	0.77	Pathogenic	-12.277	Pathogenic	0.579	Disease	0.997	Probably damaging	0.01	Deleterious	22	Deleterious
p.Asn39Cys	VUS	-53.1508	Deleterious	0.7817	Pathogenic	-7.096	Benign	0.59	Disease	1	Probably damaging	0	Deleterious
p.Asn39Trp	VUS	-13.5574	Indeterminate	0.9764	Pathogenic	-12.044	Pathogenic	0.624	Disease	0.999	Probably damaging	0	Deleterious
p.Asn39Phe	VUS	-53.1508	Deleterious	0.9575	Pathogenic	-12.354	Pathogenic	0.615	Disease	0.998	Probably damaging	0	Deleterious
p.Ala40Asn	VUS	-6.01585	Indeterminate	0.4103	Ambiguous	-12.255	Pathogenic	0.367	Neutral	0.875	Possibly damaging	0.35	Tolerated
p.Ala40Lys	VUS	-1.40266	Neutral	0.3873	Ambiguous	-9.783	Pathogenic	0.424	Neutral	0.94	Possibly damaging	0.65	Tolerated
p.Ala40Thr	VUS	-53.1508	Deleterious	0.1094	Benign	-5.346	Benign	0.129	Neutral	0.979	Probably damaging	0.49	Tolerated	20.1	Deleterious
p.Ala40Arg	VUS	-2.17568	Neutral	0.2217	Benign	-7.594	Pathogenic	0.404	Neutral	0.185	Benign	0.4	Tolerated
p.Ala40Ser	VUS	-0.833724	Neutral	0.1333	Benign	-6.222	Benign	0.173	Neutral	0.543	Possibly damaging	0.52	Tolerated	22.6	Deleterious
p.Ala40Ile	VUS	-6.05892	Indeterminate	0.2938	Benign	-9.115	Pathogenic	0.292	Neutral	0.999	Probably damaging	0.15	Tolerated
p.Ala40Met	VUS	-0.0144484	Neutral	0.3271	Benign	-9.246	Pathogenic	0.399	Neutral	1	Probably damaging	0.08	Tolerated
p.Ala40His	VUS	-0.385707	Neutral	0.3516	Ambiguous	-10.41	Pathogenic	0.385	Neutral	1	Probably damaging	0.11	Tolerated
p.Ala40Gln	VUS	-0.0193253	Neutral	0.1982	Benign	-7.808	Pathogenic	0.377	Neutral	0.991	Probably damaging	0.41	Tolerated
p.Ala40Pro	VUS	-12.196	Indeterminate	0.5607	Ambiguous	-8.421	Pathogenic	0.356	Neutral	0.997	Probably damaging	0.2	Tolerated	24.4	Deleterious
p.Ala40Leu	VUS	-53.1508	Deleterious	0.1751	Benign	-8.214	Pathogenic	0.466	Neutral	0.969	Probably damaging	0.36	Tolerated
p.Ala40Asp	VUS	-17.5582	Indeterminate	0.3014	Benign	-9.741	Pathogenic	0.362	Neutral	0.983	Probably damaging	0.43	Tolerated
p.Ala40Glu	VUS	-0.0470766	Neutral	0.1761	Benign	-6.695	Benign	0.364	Neutral	0.898	Possibly damaging	0.8	Tolerated	16.96	Deleterious
p.Ala40Gly	VUS	-0.943353	Neutral	0.1478	Benign	-5.361	Benign	0.153	Neutral	0.011	Benign	0.33	Tolerated	15.48	Deleterious
p.Ala40Val	VUS	-6.4761	Indeterminate	0.13	Benign	-6.012	Benign	0.188	Neutral	0.947	Possibly damaging	0.26	Tolerated	21.6	Deleterious
p.Ala40Tyr	VUS	-0.124801	Neutral	0.4958	Ambiguous	-11.897	Pathogenic	0.423	Neutral	0.999	Probably damaging	0.08	Tolerated
p.Ala40Cys	VUS	-1.56309	Neutral	0.5347	Ambiguous	-8.135	Pathogenic	0.378	Neutral	0.999	Probably damaging	0.05	Deleterious
p.Ala40Trp	VUS	-5.12463	Neutral	0.6552	Pathogenic	-10.319	Pathogenic	0.492	Neutral	1	Probably damaging	0.02	Deleterious
p.Ala40Phe	VUS	-2.20947	Neutral	0.3808	Ambiguous	-10.619	Pathogenic	0.446	Neutral	0.999	Probably damaging	0.08	Tolerated
p.Pro41Asn	VUS	-0.389127	Neutral	0.5988	Pathogenic	-10.557	Pathogenic	0.274	Neutral	0.669	Possibly damaging	0.07	Tolerated
p.Pro41Lys	VUS	-4.11327	Neutral	0.3597	Ambiguous	-8.967	Pathogenic	0.235	Neutral	0.321	Benign	0.11	Tolerated
p.Pro41Thr	VUS	-1.19675	Neutral	0.1485	Benign	-4.89	Benign	0.113	Neutral	0.081	Benign	0.35	Tolerated	11.57	Neutral
p.Pro41Arg	VUS	-29.9252	Indeterminate	0.1457	Benign	-5.199	Benign	0.087	Neutral	0.055	Benign	0.08	Tolerated	4.166	Neutral
p.Pro41Ser	VUS	-0.173796	Neutral	0.1671	Benign	-6.996	Benign	0.166	Neutral	0.844	Possibly damaging	0.13	Tolerated	12.33	Neutral
p.Pro41Ile	VUS	-11.503	Indeterminate	0.4238	Ambiguous	-4.307	Benign	0.281	Neutral	0.321	Benign	0.51	Tolerated
p.Pro41Met	VUS	-0.0143529	Neutral	0.506	Ambiguous	-5.749	Benign	0.263	Neutral	0.75	Possibly damaging	0.14	Tolerated
p.Pro41His	VUS	-18.0678	Indeterminate	0.3498	Ambiguous	-5.421	Benign	0.165	Neutral	0.949	Possibly damaging	0.07	Tolerated
p.Pro41Gln	VUS	-2.48365	Neutral	0.1882	Benign	-5.739	Benign	0.208	Neutral	0.852	Possibly damaging	0.09	Tolerated	12.54	Neutral
p.Pro41Leu	VUS	-0.0340505	Neutral	0.2279	Benign	-0.973	Benign	0.112	Neutral	0.013	Benign	0.51	Tolerated	8.794	Neutral
p.Pro41Asp	VUS	-2.61791	Neutral	0.584	Pathogenic	-11.964	Pathogenic	0.283	Neutral	0.337	Benign	0.05	Deleterious
p.Pro41Glu	VUS	-0.136165	Neutral	0.3055	Benign	-7.515	Pathogenic	0.236	Neutral	0.067	Benign	0.1	Tolerated
p.Pro41Ala	VUS	-0.271458	Neutral	0.07	Benign	-4.156	Benign	0.148	Neutral	0.123	Benign	0.51	Tolerated	9.373	Neutral
p.Pro41Gly	VUS	-1.82065	Neutral	0.2599	Benign	-7.594	Pathogenic	0.256	Neutral	0.839	Possibly damaging	0.05	Deleterious
p.Pro41Val	VUS	-0.304874	Neutral	0.2118	Benign	-1.595	Benign	0.194	Neutral	0.001	Benign	1	Tolerated
p.Pro41Tyr	VUS	-16.9284	Indeterminate	0.6575	Pathogenic	-7.76	Pathogenic	0.258	Neutral	0.942	Possibly damaging	0.11	Tolerated
p.Pro41Cys	VUS	-3.06605	Neutral	0.5137	Ambiguous	-6.711	Benign	0.257	Neutral	1	Probably damaging	0.11	Tolerated
p.Pro41Trp	VUS	-6.52993	Indeterminate	0.6471	Pathogenic	-10.693	Pathogenic	0.291	Neutral	0.995	Probably damaging	0.03	Deleterious
p.Pro41Phe	VUS	-4.1009	Neutral	0.6351	Pathogenic	-6.865	Benign	0.262	Neutral	0.889	Possibly damaging	0.14	Tolerated
p.Asn42Lys	VUS	-53.1508	Deleterious	0.9801	Pathogenic	-13.181	Pathogenic	0.712	Disease	0.999	Probably damaging	0	Deleterious	22.6	Deleterious
p.Asn42Thr	VUS	-3.67704	Neutral	0.6044	Pathogenic	-9.853	Pathogenic	0.64	Disease	0.994	Probably damaging	0	Deleterious	22.7	Deleterious
p.Asn42Arg	VUS	-53.1508	Deleterious	0.944	Pathogenic	-10.75	Pathogenic	0.672	Disease	1	Probably damaging	0	Deleterious
p.Asn42Ser	VUS	-3.18954	Neutral	0.2969	Benign	-8.845	Pathogenic	0.614	Disease	0.999	Probably damaging	0	Deleterious	22.3	Deleterious
p.Asn42Ile	VUS	-53.1508	Deleterious	0.9567	Pathogenic	-12.138	Pathogenic	0.816	Disease	0.999	Probably damaging	0	Deleterious	23	Deleterious
p.Asn42Met	VUS	-53.1508	Deleterious	0.9535	Pathogenic	-13.257	Pathogenic	0.757	Disease	1	Probably damaging	0	Deleterious
p.Asn42His	VUS	-53.1508	Deleterious	0.7557	Pathogenic	-10.078	Pathogenic	0.732	Disease	0.999	Probably damaging	0	Deleterious	23.6	Deleterious
p.Asn42Gln	VUS	-53.1508	Deleterious	0.9405	Pathogenic	-12.347	Pathogenic	0.658	Disease	1	Probably damaging	0	Deleterious
p.Asn42Pro	VUS	-53.1508	Deleterious	0.966	Pathogenic	-12.378	Pathogenic	0.709	Disease	1	Probably damaging	0	Deleterious
p.Asn42Leu	VUS	-53.1508	Deleterious	0.8813	Pathogenic	-11.521	Pathogenic	0.752	Disease	1	Probably damaging	0	Deleterious
p.Asn42Asp	VUS	-10.6768	Indeterminate	0.5772	Pathogenic	-7.972	Pathogenic	0.644	Disease	0.999	Probably damaging	0	Deleterious	23.8	Deleterious
p.Asn42Glu	VUS	-53.1508	Deleterious	0.9572	Pathogenic	-14.752	Pathogenic	0.623	Disease	0.998	Probably damaging	0	Deleterious
p.Asn42Ala	VUS	-3.45819	Neutral	0.87	Pathogenic	-10.394	Pathogenic	0.692	Disease	0.996	Probably damaging	0	Deleterious
p.Asn42Gly	VUS	-0.241832	Neutral	0.7349	Pathogenic	-9.497	Pathogenic	0.648	Disease	1	Probably damaging	0	Deleterious
p.Asn42Val	VUS	-53.1508	Deleterious	0.9156	Pathogenic	-12.01	Pathogenic	0.738	Disease	0.995	Probably damaging	0	Deleterious
p.Asn42Tyr	VUS	-53.1508	Deleterious	0.9089	Pathogenic	-14.335	Pathogenic	0.819	Disease	1	Probably damaging	0	Deleterious	24.2	Deleterious
p.Asn42Cys	VUS	-6.35506	Indeterminate	0.776	Pathogenic	-12.332	Pathogenic	0.731	Disease	1	Probably damaging	0	Deleterious
p.Asn42Trp	VUS	-53.1508	Deleterious	0.9933	Pathogenic	-14.737	Pathogenic	0.756	Disease	1	Probably damaging	0	Deleterious
p.Asn42Phe	VUS	-53.1508	Deleterious	0.9846	Pathogenic	-14.82	Pathogenic	0.748	Disease	1	Probably damaging	0	Deleterious
p.Ser43Asn	VUS	-3.01933	Neutral	0.2256	Benign	-5.246	Benign	0.155	Neutral	0.021	Benign	0.53	Tolerated	15.04	Deleterious
p.Ser43Lys	VUS	-0.477972	Neutral	0.4613	Ambiguous	-2.208	Benign	0.227	Neutral	0.165	Benign	0.87	Tolerated
p.Ser43Thr	VUS	-0.395532	Neutral	0.1071	Benign	-4.9	Benign	0.133	Neutral	0.021	Benign	0.56	Tolerated	14.53	Neutral
p.Ser43Arg	VUS	-0.312734	Neutral	0.2278	Benign	0.307	Benign	0.074	Neutral	0.001	Benign	0.56	Tolerated	5.19	Neutral
p.Ser43Ile	VUS	-6.5502	Indeterminate	0.2521	Benign	-6.922	Benign	0.169	Neutral	0.77	Possibly damaging	0.17	Tolerated	16.76	Deleterious
p.Ser43Met	VUS	-0.839868	Neutral	0.4134	Ambiguous	-7.157	Benign	0.223	Neutral	0.979	Probably damaging	0.1	Tolerated
p.Ser43His	VUS	-0.334929	Neutral	0.2069	Benign	-4.763	Benign	0.214	Neutral	0.003	Benign	0.13	Tolerated
p.Ser43Gln	VUS	-0.301494	Neutral	0.279	Benign	-4.043	Benign	0.215	Neutral	0.474	Possibly damaging	0.55	Tolerated
p.Ser43Pro	VUS	-0.737145	Neutral	0.1875	Benign	-5.925	Benign	0.158	Neutral	0.783	Possibly damaging	0.26	Tolerated
p.Ser43Leu	VUS	-1.74276	Neutral	0.2431	Benign	-6.354	Benign	0.164	Neutral	0.474	Possibly damaging	0.28	Tolerated
p.Ser43Asp	VUS	-1.70477	Neutral	0.3709	Ambiguous	-6.102	Benign	0.212	Neutral	0.328	Benign	0.67	Tolerated
p.Ser43Glu	VUS	-0.602974	Neutral	0.3541	Ambiguous	-4.043	Benign	0.201	Neutral	0.128	Benign	1	Tolerated
p.Ser43Ala	VUS	-0.697623	Neutral	0.0769	Benign	-2.106	Benign	0.107	Neutral	0.009	Benign	0.71	Tolerated
p.Ser43Gly	VUS	-4.02498	Neutral	0.0829	Benign	-4.55	Benign	0.126	Neutral	0.005	Benign	0.43	Tolerated	8.63	Neutral
p.Ser43Val	VUS	-1.68207	Neutral	0.2302	Benign	-5.205	Benign	0.205	Neutral	0.624	Possibly damaging	0.26	Tolerated
p.Ser43Tyr	VUS	-2.22471	Neutral	0.2925	Benign	-8.819	Pathogenic	0.217	Neutral	0.686	Possibly damaging	0.05	Deleterious
p.Ser43Cys	VUS	-5.99684	Indeterminate	0.1382	Benign	-5.327	Benign	0.139	Neutral	0.905	Possibly damaging	0.05	Deleterious	10.53	Neutral
p.Ser43Trp	VUS	-2.10043	Neutral	0.3461	Ambiguous	-7.764	Pathogenic	0.266	Neutral	0.994	Probably damaging	0.02	Deleterious
p.Ser43Phe	VUS	-1.31664	Neutral	0.3716	Ambiguous	-9.448	Pathogenic	0.175	Neutral	0.816	Possibly damaging	0.05	Deleterious
p.Tyr44Asn	VUS	-3.68512	Neutral	0.5574	Ambiguous	-12.784	Pathogenic	0.273	Neutral	0.99	Probably damaging	0.26	Tolerated	14.06	Neutral
p.Tyr44Lys	VUS	-8.10072	Indeterminate	0.7979	Pathogenic	-13.386	Pathogenic	0.31	Neutral	0.97	Probably damaging	0.15	Tolerated
p.Tyr44Thr	VUS	-1.081	Neutral	0.7134	Pathogenic	-12.717	Pathogenic	0.346	Neutral	0.996	Probably damaging	0.2	Tolerated
p.Tyr44Arg	VUS	-3.23233	Neutral	0.5169	Ambiguous	-10.934	Pathogenic	0.285	Neutral	0.997	Probably damaging	0.15	Tolerated
p.Tyr44Ser	VUS	-3.01764	Neutral	0.4284	Ambiguous	-10.592	Pathogenic	0.225	Neutral	0.995	Probably damaging	0.32	Tolerated	13.61	Neutral
p.Tyr44Ile	VUS	-3.04811	Neutral	0.7981	Pathogenic	-14.016	Pathogenic	0.304	Neutral	0.088	Benign	0.18	Tolerated
p.Tyr44Met	VUS	-3.21544	Neutral	0.816	Pathogenic	-11.394	Pathogenic	0.295	Neutral	0.993	Probably damaging	0.1	Tolerated
p.Tyr44His	VUS	-1.55175	Neutral	0.3798	Ambiguous	-9.042	Pathogenic	0.142	Neutral	0.085	Benign	0.24	Tolerated	9.59	Neutral
p.Tyr44Gln	VUS	-18.2052	Indeterminate	0.6722	Pathogenic	-11.733	Pathogenic	0.227	Neutral	0.996	Probably damaging	0.14	Tolerated
p.Tyr44Pro	VUS	-32.8925	Indeterminate	0.9497	Pathogenic	-13.45	Pathogenic	0.301	Neutral	1	Probably damaging	0.11	Tolerated
p.Tyr44Leu	VUS	-2.69461	Neutral	0.6422	Pathogenic	-8.396	Pathogenic	0.27	Neutral	0.002	Benign	0.31	Tolerated
p.Tyr44Asp	VUS	-6.48428	Indeterminate	0.6152	Pathogenic	-12.629	Pathogenic	0.245	Neutral	0.999	Probably damaging	0.32	Tolerated	14.26	Neutral
p.Tyr44Glu	VUS	-13.6081	Indeterminate	0.8125	Pathogenic	-13.47	Pathogenic	0.314	Neutral	0.992	Probably damaging	0.16	Tolerated
p.Tyr44Ala	VUS	-26.2892	Indeterminate	0.5926	Pathogenic	-11.132	Pathogenic	0.291	Neutral	0.982	Probably damaging	0.25	Tolerated
p.Tyr44Gly	VUS	-11.4418	Indeterminate	0.5878	Pathogenic	-12.275	Pathogenic	0.303	Neutral	0.996	Probably damaging	0.22	Tolerated
p.Tyr44Val	VUS	-0.877384	Neutral	0.6303	Pathogenic	-12.568	Pathogenic	0.32	Neutral	0.864	Possibly damaging	0.22	Tolerated
p.Tyr44Cys	VUS	-2.08194	Neutral	0.3951	Ambiguous	-9.384	Pathogenic	0.199	Neutral	0.999	Probably damaging	0.08	Tolerated	17.56	Deleterious
p.Tyr44Trp	VUS	-1.96037	Neutral	0.3594	Ambiguous	-11.107	Pathogenic	0.288	Neutral	0.963	Probably damaging	0.12	Tolerated
p.Tyr44Phe	VUS	-2.37946	Neutral	0.1446	Benign	-3.7	Benign	0.179	Neutral	0.004	Benign	1	Tolerated	0.484	Neutral
p.Gly45Asn	VUS	-1.75274	Neutral	0.7484	Pathogenic	-11.776	Pathogenic	0.77	Disease	1	Probably damaging	0.02	Deleterious
p.Gly45Lys	VUS	-3.95	Neutral	0.877	Pathogenic	-15.083	Pathogenic	0.788	Disease	1	Probably damaging	0.12	Tolerated
p.Gly45Thr	VUS	-1.79653	Neutral	0.8377	Pathogenic	-13.432	Pathogenic	0.767	Disease	1	Probably damaging	0.01	Deleterious
p.Gly45Arg	VUS	-0.500332	Neutral	0.6263	Pathogenic	-12.97	Pathogenic	0.826	Disease	1	Probably damaging	0.02	Deleterious	26	Deleterious
p.Gly45Ser	VUS	-10.5357	Indeterminate	0.4477	Ambiguous	-10.497	Pathogenic	0.834	Disease	1	Probably damaging	0.03	Deleterious	26	Deleterious
p.Gly45Ile	VUS	-13.6709	Indeterminate	0.9659	Pathogenic	-18.237	Pathogenic	0.789	Disease	1	Probably damaging	0	Deleterious
p.Gly45Met	VUS	-2.55672	Neutral	0.9583	Pathogenic	-15.461	Pathogenic	0.793	Disease	1	Probably damaging	0	Deleterious
p.Gly45His	VUS	-2.00693	Neutral	0.7485	Pathogenic	-14.87	Pathogenic	0.774	Disease	1	Probably damaging	0.01	Deleterious
p.Gly45Gln	VUS	-0.278391	Neutral	0.6642	Pathogenic	-14.018	Pathogenic	0.776	Disease	1	Probably damaging	0.01	Deleterious
p.Gly45Pro	VUS	-53.1508	Deleterious	0.9945	Pathogenic	-18.626	Pathogenic	0.764	Disease	1	Probably damaging	0.01	Deleterious
p.Gly45Leu	VUS	-0.820725	Neutral	0.8676	Pathogenic	-14.319	Pathogenic	0.783	Disease	1	Probably damaging	0.01	Deleterious
p.Gly45Asp	VUS	-0.257418	Neutral	0.7037	Pathogenic	-10.045	Pathogenic	0.863	Disease	1	Probably damaging	0.02	Deleterious	25.5	Deleterious
p.Gly45Glu	VUS	-1.14881	Neutral	0.8048	Pathogenic	-12.398	Pathogenic	0.877	Disease	1	Probably damaging	0.01	Deleterious
p.Gly45Ala	VUS	-2.1865	Neutral	0.5934	Pathogenic	-11.156	Pathogenic	0.83	Disease	0.999	Probably damaging	0.03	Deleterious	24.9	Deleterious
p.Gly45Val	VUS	-21.7677	Indeterminate	0.9261	Pathogenic	-14.582	Pathogenic	0.873	Disease	1	Probably damaging	0.01	Deleterious	25.7	Deleterious
p.Gly45Tyr	VUS	-3.3729	Neutral	0.8664	Pathogenic	-16.388	Pathogenic	0.796	Disease	1	Probably damaging	0	Deleterious
p.Gly45Cys	VUS	-0.519846	Neutral	0.7436	Pathogenic	-13.805	Pathogenic	0.889	Disease	1	Probably damaging	0	Deleterious	26.9	Deleterious
p.Gly45Trp	VUS	-3.98727	Neutral	0.8636	Pathogenic	-14.991	Pathogenic	0.845	Disease	1	Probably damaging	0	Deleterious
p.Gly45Phe	VUS	-0.0906141	Neutral	0.9352	Pathogenic	-16.785	Pathogenic	0.795	Disease	1	Probably damaging	0	Deleterious
p.Arg46Asn	VUS	-0.709708	Neutral	0.9806	Pathogenic	-15.6	Pathogenic	0.671	Disease	1	Probably damaging	0.18	Tolerated
p.Arg46Lys	VUS	-0.408231	Neutral	0.731	Pathogenic	-13.236	Pathogenic	0.476	Neutral	0.997	Probably damaging	0.58	Tolerated
p.Arg46Thr	VUS	-33.0701	Indeterminate	0.9723	Pathogenic	-15.004	Pathogenic	0.799	Disease	1	Probably damaging	0.08	Tolerated
p.Arg46Ser	VUS	-0.318541	Neutral	0.9811	Pathogenic	-13.337	Pathogenic	0.804	Disease	1	Probably damaging	0.06	Tolerated
p.Arg46Ile	VUS	-53.1508	Deleterious	0.9128	Pathogenic	-17.1	Pathogenic	0.742	Disease	1	Probably damaging	0.03	Deleterious
p.Arg46Met	VUS	-10.7131	Indeterminate	0.9584	Pathogenic	-16.817	Pathogenic	0.717	Disease	1	Probably damaging	0.02	Deleterious
p.Arg46His	VUS	-0.525373	Neutral	0.6345	Pathogenic	-13.325	Pathogenic	0.66	Disease	1	Probably damaging	0.06	Tolerated
p.Arg46Gln	VUS	-14.279	Indeterminate	0.5586	Ambiguous	-13.159	Pathogenic	0.62	Disease	1	Probably damaging	0.16	Tolerated	26.2	Deleterious
p.Arg46Pro	VUS	-53.1508	Deleterious	0.9714	Pathogenic	-16.652	Pathogenic	0.867	Disease	1	Probably damaging	0.05	Deleterious	25.5	Deleterious
p.Arg46Leu	VUS	-5.97367	Indeterminate	0.7987	Pathogenic	-15.222	Pathogenic	0.81	Disease	1	Probably damaging	0.21	Tolerated	25.7	Deleterious
p.Arg46Asp	VUS	-53.1508	Deleterious	0.9842	Pathogenic	-18.852	Pathogenic	0.766	Disease	1	Probably damaging	0.02	Deleterious
p.Arg46Glu	VUS	-53.1508	Deleterious	0.9098	Pathogenic	-17.418	Pathogenic	0.678	Disease	1	Probably damaging	0.1	Tolerated
p.Arg46Ala	VUS	-10.4493	Indeterminate	0.9674	Pathogenic	-13.762	Pathogenic	0.661	Disease	1	Probably damaging	0.07	Tolerated
p.Arg46Gly	VUS	-6.53725	Indeterminate	0.933	Pathogenic	-11.732	Pathogenic	0.818	Disease	1	Probably damaging	0.05	Deleterious	23.5	Deleterious
p.Arg46Val	VUS	-27.5836	Indeterminate	0.9279	Pathogenic	-16.093	Pathogenic	0.731	Disease	1	Probably damaging	0.04	Deleterious
p.Arg46Tyr	VUS	-14.3368	Indeterminate	0.883	Pathogenic	-15.099	Pathogenic	0.704	Disease	0.999	Probably damaging	0.03	Deleterious
p.Arg46Cys	VUS	-5.5132	Neutral	0.8016	Pathogenic	-11.137	Pathogenic	0.816	Disease	1	Probably damaging	0.01	Deleterious
p.Arg46Trp	VUS	-0.327487	Neutral	0.6392	Pathogenic	-12.928	Pathogenic	0.8	Disease	1	Probably damaging	0.01	Deleterious	24.5	Deleterious
p.Arg46Phe	VUS	-1.84039	Neutral	0.9478	Pathogenic	-15.173	Pathogenic	0.713	Disease	0.999	Probably damaging	0.02	Deleterious
p.Arg47Asn	VUS	-2.19721	Neutral	0.7485	Pathogenic	-9.562	Pathogenic	0.345	Neutral	0.791	Possibly damaging	0.13	Tolerated
p.Arg47Lys	VUS	-2.23629	Neutral	0.3095	Benign	-7.654	Pathogenic	0.141	Neutral	0.254	Benign	0.14	Tolerated	14.41	Neutral
p.Arg47Thr	VUS	-1.26621	Neutral	0.3093	Benign	-5.095	Benign	0.145	Neutral	0.009	Benign	1	Tolerated	2.993	Neutral
p.Arg47Ser	VUS	-8.25422	Indeterminate	0.5326	Ambiguous	-6.215	Benign	0.114	Neutral	0.052	Benign	0.52	Tolerated	9.65	Neutral
p.Arg47Ile	VUS	-3.0159	Neutral	0.6194	Pathogenic	-11.611	Pathogenic	0.295	Neutral	0.979	Probably damaging	0.05	Deleterious
p.Arg47Met	VUS	-1.94259	Neutral	0.5667	Pathogenic	-7.272	Benign	0.33	Neutral	0.96	Probably damaging	0.03	Deleterious	18.8	Deleterious
p.Arg47His	VUS	-2.42369	Neutral	0.2039	Benign	-5.44	Benign	0.194	Neutral	0.97	Probably damaging	0.03	Deleterious
p.Arg47Gln	VUS	-10.6452	Indeterminate	0.2172	Benign	-6.436	Benign	0.164	Neutral	0.871	Possibly damaging	0.08	Tolerated
p.Arg47Pro	VUS	-11.6142	Indeterminate	0.7548	Pathogenic	-8.24	Pathogenic	0.291	Neutral	0.987	Probably damaging	0.09	Tolerated
p.Arg47Leu	VUS	-0.369775	Neutral	0.3066	Benign	-5.624	Benign	0.236	Neutral	0.904	Possibly damaging	0.05	Deleterious
p.Arg47Asp	VUS	-53.1508	Deleterious	0.9177	Pathogenic	-15.008	Pathogenic	0.374	Neutral	0.975	Probably damaging	0.08	Tolerated
p.Arg47Glu	VUS	-3.92041	Neutral	0.748	Pathogenic	-13.091	Pathogenic	0.303	Neutral	0.532	Possibly damaging	0.06	Tolerated
p.Arg47Ala	VUS	-2.77441	Neutral	0.5277	Ambiguous	-7.577	Pathogenic	0.295	Neutral	0.453	Possibly damaging	0.18	Tolerated
p.Arg47Gly	VUS	-9.18067	Indeterminate	0.4602	Ambiguous	-10.59	Pathogenic	0.158	Neutral	0.858	Possibly damaging	0.07	Tolerated	16.41	Deleterious
p.Arg47Val	VUS	-1.22589	Neutral	0.5757	Pathogenic	-9.786	Pathogenic	0.318	Neutral	0.943	Possibly damaging	0.08	Tolerated
p.Arg47Tyr	VUS	-1.98716	Neutral	0.5044	Ambiguous	-5.051	Benign	0.297	Neutral	0.847	Possibly damaging	0.02	Deleterious
p.Arg47Cys	VUS	-0.30895	Neutral	0.2597	Benign	-7.451	Benign	0.153	Neutral	1	Probably damaging	0.03	Deleterious
p.Arg47Trp	VUS	-3.86409	Neutral	0.2964	Benign	-8.902	Pathogenic	0.262	Neutral	0.983	Probably damaging	0.01	Deleterious	22.4	Deleterious
p.Arg47Phe	VUS	-0.199749	Neutral	0.7065	Pathogenic	-7.032	Benign	0.322	Neutral	0.645	Possibly damaging	0.02	Deleterious
p.Pro48Asn	VUS	-53.1508	Deleterious	0.9787	Pathogenic	-17.255	Pathogenic	0.636	Disease	0.955	Possibly damaging	0.04	Deleterious
p.Pro48Lys	VUS	-53.1508	Deleterious	0.9943	Pathogenic	-20.624	Pathogenic	0.699	Disease	0.988	Probably damaging	0.06	Tolerated
p.Pro48Thr	Pathogenic	-19.3017	Indeterminate	0.8084	Pathogenic	-11.008	Pathogenic	0.608	Disease	0.691	Possibly damaging	0.11	Tolerated	16.24	Deleterious
p.Pro48Arg	VUS	-53.1508	Deleterious	0.9677	Pathogenic	-16.851	Pathogenic	0.73	Disease	0.997	Probably damaging	0.04	Deleterious	25.6	Deleterious
p.Pro48Ser	VUS	-4.29865	Neutral	0.6914	Pathogenic	-9.325	Pathogenic	0.568	Disease	0.933	Possibly damaging	0.29	Tolerated	16.81	Deleterious
p.Pro48Ile	VUS	-53.1508	Deleterious	0.9751	Pathogenic	-16.413	Pathogenic	0.664	Disease	0.988	Probably damaging	0.04	Deleterious
p.Pro48Met	VUS	-53.1508	Deleterious	0.9761	Pathogenic	-15.407	Pathogenic	0.651	Disease	0.999	Probably damaging	0.03	Deleterious
p.Pro48His	VUS	-53.1508	Deleterious	0.9692	Pathogenic	-17.19	Pathogenic	0.641	Disease	0.999	Probably damaging	0.01	Deleterious
p.Pro48Gln	VUS	-53.1508	Deleterious	0.9466	Pathogenic	-16.151	Pathogenic	0.632	Disease	0.992	Probably damaging	0.04	Deleterious	26	Deleterious
p.Pro48Leu	VUS	-53.1508	Deleterious	0.8968	Pathogenic	-13.237	Pathogenic	0.747	Disease	0.981	Probably damaging	0.06	Tolerated	26.6	Deleterious
p.Pro48Asp	VUS	-53.1508	Deleterious	0.9925	Pathogenic	-18.195	Pathogenic	0.678	Disease	0.949	Possibly damaging	0.05	Deleterious
p.Pro48Glu	VUS	-53.1508	Deleterious	0.9801	Pathogenic	-16.517	Pathogenic	0.663	Disease	0.724	Possibly damaging	0.06	Tolerated
p.Pro48Ala	VUS	-0.0382204	Neutral	0.314	Benign	-5.17	Benign	0.326	Neutral	0.011	Benign	1	Tolerated	7.249	Neutral
p.Pro48Gly	VUS	-14.9859	Indeterminate	0.8399	Pathogenic	-12.288	Pathogenic	0.493	Neutral	0.93	Possibly damaging	0.31	Tolerated
p.Pro48Val	VUS	-17.0479	Indeterminate	0.8808	Pathogenic	-11.126	Pathogenic	0.627	Disease	0.676	Possibly damaging	0.11	Tolerated
p.Pro48Tyr	VUS	-53.1508	Deleterious	0.9952	Pathogenic	-19.092	Pathogenic	0.651	Disease	0.998	Probably damaging	0.02	Deleterious
p.Pro48Cys	VUS	-29.7515	Indeterminate	0.9269	Pathogenic	-12.008	Pathogenic	0.64	Disease	1	Probably damaging	0.06	Tolerated
p.Pro48Trp	VUS	-53.1508	Deleterious	0.9966	Pathogenic	-19.533	Pathogenic	0.645	Disease	0.999	Probably damaging	0.01	Deleterious
p.Pro48Phe	VUS	-53.1508	Deleterious	0.9958	Pathogenic	-17.677	Pathogenic	0.66	Disease	0.994	Probably damaging	0.02	Deleterious
p.Ile49Asn	VUS	-53.1508	Deleterious	0.9737	Pathogenic	-15.565	Pathogenic	0.867	Disease	1	Probably damaging	0	Deleterious	26.4	Deleterious
p.Ile49Lys	VUS	-53.1508	Deleterious	0.9874	Pathogenic	-19.118	Pathogenic	0.844	Disease	0.983	Probably damaging	0	Deleterious
p.Ile49Thr	Likely pathogenic	-29.951	Indeterminate	0.9628	Pathogenic	-12.041	Pathogenic	0.678	Disease	1	Probably damaging	0.01	Deleterious	25.7	Deleterious
p.Ile49Arg	VUS	-53.1508	Deleterious	0.9636	Pathogenic	-15.137	Pathogenic	0.81	Disease	0.999	Probably damaging	0	Deleterious
p.Ile49Ser	Likely pathogenic	-53.1508	Deleterious	0.941	Pathogenic	-14.124	Pathogenic	0.874	Disease	1	Probably damaging	0	Deleterious	26.5	Deleterious
p.Ile49Met	VUS	-1.1156	Neutral	0.4493	Ambiguous	-9.302	Pathogenic	0.611	Disease	1	Probably damaging	0.04	Deleterious	19.76	Deleterious
p.Ile49His	VUS	-53.1508	Deleterious	0.9776	Pathogenic	-14.203	Pathogenic	0.791	Disease	1	Probably damaging	0	Deleterious
p.Ile49Gln	VUS	-53.1508	Deleterious	0.9677	Pathogenic	-13.761	Pathogenic	0.809	Disease	1	Probably damaging	0.01	Deleterious
p.Ile49Pro	VUS	-53.1508	Deleterious	0.9578	Pathogenic	-13	Pathogenic	0.77	Disease	1	Probably damaging	0	Deleterious
p.Ile49Leu	VUS	-0.36921	Neutral	0.2537	Benign	-1.419	Benign	0.3	Neutral	0.926	Possibly damaging	1	Tolerated	17.23	Deleterious
p.Ile49Asp	VUS	-53.1508	Deleterious	0.9963	Pathogenic	-18.443	Pathogenic	0.785	Disease	1	Probably damaging	0	Deleterious
p.Ile49Glu	VUS	-53.1508	Deleterious	0.9845	Pathogenic	-17.499	Pathogenic	0.789	Disease	1	Probably damaging	0	Deleterious
p.Ile49Ala	VUS	-29.5511	Indeterminate	0.9073	Pathogenic	-13.413	Pathogenic	0.644	Disease	1	Probably damaging	0.01	Deleterious
p.Ile49Gly	VUS	-53.1508	Deleterious	0.9822	Pathogenic	-16.641	Pathogenic	0.731	Disease	1	Probably damaging	0	Deleterious
p.Ile49Val	VUS	-0.790357	Neutral	0.3085	Benign	-6.854	Benign	0.414	Neutral	0.948	Possibly damaging	0.06	Tolerated	19.03	Deleterious
p.Ile49Tyr	VUS	-53.1508	Deleterious	0.9512	Pathogenic	-16.37	Pathogenic	0.685	Disease	0.989	Probably damaging	0	Deleterious
p.Ile49Cys	VUS	-19.5895	Indeterminate	0.9731	Pathogenic	-14.939	Pathogenic	0.688	Disease	1	Probably damaging	0	Deleterious
p.Ile49Trp	VUS	-53.1508	Deleterious	0.9727	Pathogenic	-16.392	Pathogenic	0.705	Disease	1	Probably damaging	0	Deleterious
p.Ile49Phe	VUS	-27.9657	Indeterminate	0.6763	Pathogenic	-11.844	Pathogenic	0.754	Disease	0.998	Probably damaging	0.03	Deleterious	24.4	Deleterious
p.Gln50Asn	VUS	-12.4887	Indeterminate	0.8074	Pathogenic	-10.428	Pathogenic	0.698	Disease	0.998	Probably damaging	0.03	Deleterious
p.Gln50Lys	VUS	-53.1508	Deleterious	0.9228	Pathogenic	-17.579	Pathogenic	0.761	Disease	0.931	Possibly damaging	0.07	Tolerated	26.3	Deleterious
p.Gln50Thr	VUS	-10.882	Indeterminate	0.6796	Pathogenic	-13.738	Pathogenic	0.684	Disease	0.959	Probably damaging	0.02	Deleterious
p.Gln50Arg	VUS	-53.1508	Deleterious	0.84	Pathogenic	-14.094	Pathogenic	0.78	Disease	0.955	Possibly damaging	0.05	Deleterious	28.5	Deleterious
p.Gln50Ser	VUS	-5.38522	Neutral	0.555	Ambiguous	-12.728	Pathogenic	0.676	Disease	0.999	Probably damaging	0.02	Deleterious
p.Gln50Ile	VUS	-53.1508	Deleterious	0.9391	Pathogenic	-17.139	Pathogenic	0.749	Disease	0.993	Probably damaging	0.01	Deleterious
p.Gln50Met	VUS	-2.0491	Neutral	0.8088	Pathogenic	-14.725	Pathogenic	0.698	Disease	0.993	Probably damaging	0	Deleterious
p.Gln50His	VUS	-53.1508	Deleterious	0.7198	Pathogenic	-3.595	Benign	0.752	Disease	0.991	Probably damaging	0.27	Tolerated	33	Deleterious
p.Gln50Pro	VUS	-53.1508	Deleterious	0.7863	Pathogenic	-11.254	Pathogenic	0.856	Disease	1	Probably damaging	0.02	Deleterious	27.6	Deleterious
p.Gln50Leu	VUS	-19.9521	Indeterminate	0.7182	Pathogenic	-13.311	Pathogenic	0.797	Disease	0.97	Probably damaging	0.01	Deleterious	29.8	Deleterious
p.Gln50Asp	VUS	-53.1508	Deleterious	0.8569	Pathogenic	-12.665	Pathogenic	0.727	Disease	0.998	Probably damaging	0.03	Deleterious
p.Gln50Glu	VUS	-1.37327	Neutral	0.1941	Benign	-13.92	Pathogenic	0.744	Disease	0.995	Probably damaging	0.04	Deleterious	25.5	Deleterious
p.Gln50Ala	VUS	-10.3874	Indeterminate	0.5825	Pathogenic	-13.355	Pathogenic	0.722	Disease	0.998	Probably damaging	0.02	Deleterious
p.Gln50Gly	VUS	-13.6355	Indeterminate	0.7192	Pathogenic	-12.925	Pathogenic	0.699	Disease	1	Probably damaging	0.03	Deleterious
p.Gln50Val	VUS	-53.1508	Deleterious	0.87	Pathogenic	-15.575	Pathogenic	0.735	Disease	1	Probably damaging	0.01	Deleterious
p.Gln50Tyr	VUS	-53.1508	Deleterious	0.9728	Pathogenic	-11.607	Pathogenic	0.764	Disease	0.995	Probably damaging	0.01	Deleterious
p.Gln50Cys	VUS	-22.3653	Indeterminate	0.9729	Pathogenic	-15.457	Pathogenic	0.746	Disease	1	Probably damaging	0	Deleterious
p.Gln50Trp	VUS	-53.1508	Deleterious	0.9737	Pathogenic	-15.747	Pathogenic	0.77	Disease	1	Probably damaging	0	Deleterious
p.Gln50Phe	VUS	-53.1508	Deleterious	0.9641	Pathogenic	-15.266	Pathogenic	0.753	Disease	0.995	Probably damaging	0	Deleterious
p.Val51Asn	VUS	-53.1508	Deleterious	0.8296	Pathogenic	-10.662	Pathogenic	0.775	Disease	1	Probably damaging	0.01	Deleterious
p.Val51Lys	VUS	-53.1508	Deleterious	0.9357	Pathogenic	-12.519	Pathogenic	0.814	Disease	0.999	Probably damaging	0.01	Deleterious
p.Val51Thr	VUS	-4.90028	Neutral	0.6936	Pathogenic	-7.677	Pathogenic	0.55	Disease	1	Probably damaging	0.03	Deleterious
p.Val51Arg	VUS	-53.1508	Deleterious	0.8385	Pathogenic	-11.709	Pathogenic	0.808	Disease	1	Probably damaging	0.01	Deleterious
p.Val51Ser	VUS	-0.221758	Neutral	0.7805	Pathogenic	-8.947	Pathogenic	0.729	Disease	1	Probably damaging	0.01	Deleterious
p.Val51Ile	VUS	-5.58037	Neutral	0.2785	Benign	-7.632	Pathogenic	0.531	Disease	0.958	Probably damaging	0.41	Tolerated	28.5	Deleterious
p.Val51Met	VUS	-53.1508	Deleterious	0.7295	Pathogenic	-9.084	Pathogenic	0.676	Disease	1	Probably damaging	0.02	Deleterious
p.Val51His	VUS	-53.1508	Deleterious	0.9476	Pathogenic	-13.56	Pathogenic	0.798	Disease	1	Probably damaging	0	Deleterious
p.Val51Gln	VUS	-53.1508	Deleterious	0.8361	Pathogenic	-11.732	Pathogenic	0.783	Disease	0.999	Probably damaging	0.01	Deleterious
p.Val51Pro	VUS	-53.1508	Deleterious	0.9692	Pathogenic	-12.622	Pathogenic	0.799	Disease	1	Probably damaging	0.01	Deleterious
p.Val51Leu	VUS	-1.83724	Neutral	0.7283	Pathogenic	-8.304	Pathogenic	0.75	Disease	0.958	Probably damaging	0.11	Tolerated	31	Deleterious
p.Val51Asp	VUS	-53.1508	Deleterious	0.9045	Pathogenic	-15.143	Pathogenic	0.877	Disease	1	Probably damaging	0.01	Deleterious	26.9	Deleterious
p.Val51Glu	VUS	-53.1508	Deleterious	0.8206	Pathogenic	-14.067	Pathogenic	0.86	Disease	1	Probably damaging	0.01	Deleterious
p.Val51Ala	VUS	-0.00939846	Neutral	0.6612	Pathogenic	-6.725	Benign	0.747	Disease	1	Probably damaging	0.04	Deleterious	26.3	Deleterious
p.Val51Gly	VUS	-3.26055	Neutral	0.5831	Pathogenic	-8.937	Pathogenic	0.684	Disease	1	Probably damaging	0.01	Deleterious	26.4	Deleterious
p.Val51Tyr	VUS	-53.1508	Deleterious	0.909	Pathogenic	-14.188	Pathogenic	0.766	Disease	1	Probably damaging	0.12	Tolerated
p.Val51Cys	VUS	-0.372598	Neutral	0.93	Pathogenic	-11.254	Pathogenic	0.76	Disease	1	Probably damaging	0.16	Tolerated
p.Val51Trp	VUS	-53.1508	Deleterious	0.9773	Pathogenic	-13.511	Pathogenic	0.757	Disease	1	Probably damaging	0	Deleterious
p.Val51Phe	VUS	-53.1508	Deleterious	0.7444	Pathogenic	-12.375	Pathogenic	0.809	Disease	1	Probably damaging	0.03	Deleterious	32	Deleterious
p.Met52Asn	VUS	-16.423	Indeterminate	0.9627	Pathogenic	-13.681	Pathogenic	0.72	Disease	0.999	Probably damaging	0.14	Tolerated
p.Met52Lys	VUS	-53.1508	Deleterious	0.954	Pathogenic	-14.137	Pathogenic	0.823	Disease	0.496	Possibly damaging	0.14	Tolerated	27.9	Deleterious
p.Met52Thr	VUS	-1.16932	Neutral	0.7826	Pathogenic	-9.068	Pathogenic	0.769	Disease	0.823	Possibly damaging	0.5	Tolerated	26.4	Deleterious
p.Met52Arg	VUS	-53.1508	Deleterious	0.9272	Pathogenic	-12.644	Pathogenic	0.818	Disease	0.679	Possibly damaging	0.1	Tolerated	28.5	Deleterious
p.Met52Ser	VUS	-0.0665233	Neutral	0.8548	Pathogenic	-11.631	Pathogenic	0.723	Disease	0.978	Probably damaging	0.72	Tolerated
p.Met52Ile	VUS	-7.8188	Indeterminate	0.9224	Pathogenic	-11.189	Pathogenic	0.736	Disease	0.091	Benign	0.16	Tolerated	24.97	Deleterious
p.Met52His	VUS	-4.18877	Neutral	0.9567	Pathogenic	-12.751	Pathogenic	0.742	Disease	0.998	Probably damaging	0.04	Deleterious
p.Met52Gln	VUS	-1.31332	Neutral	0.7907	Pathogenic	-9.558	Pathogenic	0.701	Disease	0.992	Probably damaging	0.1	Tolerated
p.Met52Pro	VUS	-13.0531	Indeterminate	0.9812	Pathogenic	-11.773	Pathogenic	0.732	Disease	0.992	Probably damaging	0.26	Tolerated
p.Met52Leu	VUS	-0.0148769	Neutral	0.3933	Ambiguous	-6.102	Benign	0.659	Disease	0.019	Benign	0.28	Tolerated	23.35	Deleterious
p.Met52Asp	VUS	-28.2032	Indeterminate	0.9925	Pathogenic	-17.571	Pathogenic	0.714	Disease	0.992	Probably damaging	0.11	Tolerated
p.Met52Glu	VUS	-11.114	Indeterminate	0.9593	Pathogenic	-14.712	Pathogenic	0.706	Disease	0.981	Probably damaging	0.11	Tolerated
p.Met52Ala	VUS	-0.00657866	Neutral	0.6987	Pathogenic	-9.191	Pathogenic	0.72	Disease	0.543	Possibly damaging	1	Tolerated
p.Met52Gly	VUS	-0.000404488	Neutral	0.9223	Pathogenic	-13.233	Pathogenic	0.704	Disease	0.989	Probably damaging	0.5	Tolerated
p.Met52Val	VUS	-0.011242	Neutral	0.4159	Ambiguous	-8.754	Pathogenic	0.464	Neutral	0.197	Benign	0.32	Tolerated	22.8	Deleterious
p.Met52Tyr	VUS	-8.16831	Indeterminate	0.9589	Pathogenic	-16.794	Pathogenic	0.697	Disease	0.932	Possibly damaging	0.07	Tolerated
p.Met52Cys	VUS	-0.00888488	Neutral	0.8433	Pathogenic	-11.899	Pathogenic	0.699	Disease	1	Probably damaging	0.25	Tolerated
p.Met52Trp	VUS	-9.17384	Indeterminate	0.9696	Pathogenic	-14.811	Pathogenic	0.695	Disease	0.998	Probably damaging	0.03	Deleterious
p.Met52Phe	VUS	-4.81472	Neutral	0.7519	Pathogenic	-12.435	Pathogenic	0.655	Disease	0.14	Benign	0.09	Tolerated
p.Met53Asn	VUS	-32.9924	Indeterminate	0.9195	Pathogenic	-15.29	Pathogenic	0.717	Disease	0.999	Probably damaging	0.3	Tolerated
p.Met53Lys	VUS	-8.88142	Indeterminate	0.8127	Pathogenic	-11.469	Pathogenic	0.511	Disease	0.928	Possibly damaging	0.59	Tolerated	24.5	Deleterious
p.Met53Thr	VUS	-33.2189	Indeterminate	0.8028	Pathogenic	-10.332	Pathogenic	0.757	Disease	0.997	Probably damaging	0.41	Tolerated	25.8	Deleterious
p.Met53Arg	VUS	-3.53545	Neutral	0.6785	Pathogenic	-10.141	Pathogenic	0.584	Disease	0.988	Probably damaging	0.42	Tolerated	26.6	Deleterious
p.Met53Ser	VUS	-6.06998	Indeterminate	0.8555	Pathogenic	-9.893	Pathogenic	0.717	Disease	0.999	Probably damaging	0.52	Tolerated
p.Met53Ile	Pathogenic	-53.1508	Deleterious	0.9254	Pathogenic	-10.435	Pathogenic	0.644	Disease	0.941	Possibly damaging	0.59	Tolerated	28.8	Deleterious
p.Met53His	VUS	-33.1773	Indeterminate	0.889	Pathogenic	-13.75	Pathogenic	0.725	Disease	1	Probably damaging	0.48	Tolerated
p.Met53Gln	VUS	-1.48548	Neutral	0.4944	Ambiguous	-10.256	Pathogenic	0.486	Neutral	0.999	Probably damaging	0.31	Tolerated
p.Met53Pro	VUS	-53.1508	Deleterious	0.9676	Pathogenic	-10.039	Pathogenic	0.718	Disease	1	Probably damaging	0.2	Tolerated
p.Met53Leu	VUS	-6.97106	Indeterminate	0.3533	Ambiguous	-5.697	Benign	0.605	Disease	0.875	Possibly damaging	0.67	Tolerated	25.65	Deleterious
p.Met53Asp	VUS	-53.1508	Deleterious	0.9768	Pathogenic	-16.239	Pathogenic	0.702	Disease	0.999	Probably damaging	0.2	Tolerated
p.Met53Glu	VUS	-53.1508	Deleterious	0.8544	Pathogenic	-13.116	Pathogenic	0.704	Disease	1	Probably damaging	0.29	Tolerated
p.Met53Ala	VUS	-4.26907	Neutral	0.7197	Pathogenic	-9.612	Pathogenic	0.691	Disease	0.999	Probably damaging	0.5	Tolerated
p.Met53Gly	VUS	-53.1508	Deleterious	0.8671	Pathogenic	-12.13	Pathogenic	0.703	Disease	0.545	Possibly damaging	0.31	Tolerated
p.Met53Val	Likely pathogenic	-53.1508	Deleterious	0.4637	Ambiguous	-8.215	Pathogenic	0.666	Disease	1	Probably damaging	0.51	Tolerated	25	Deleterious
p.Met53Tyr	VUS	-53.1508	Deleterious	0.8966	Pathogenic	-14.304	Pathogenic	0.663	Disease	0.998	Probably damaging	1	Tolerated
p.Met53Cys	VUS	-11.1922	Indeterminate	0.9022	Pathogenic	-12.066	Pathogenic	0.72	Disease	1	Probably damaging	0.16	Tolerated
p.Met53Trp	VUS	-53.1508	Deleterious	0.9197	Pathogenic	-12.972	Pathogenic	0.666	Disease	1	Probably damaging	0.16	Tolerated
p.Met53Phe	VUS	-53.1508	Deleterious	0.647	Pathogenic	-12.532	Pathogenic	0.637	Disease	0.929	Possibly damaging	0.61	Tolerated
p.Met54Asn	VUS	-1.00163	Neutral	0.7165	Pathogenic	-10.22	Pathogenic	0.6	Disease	1	Probably damaging	0.1	Tolerated
p.Met54Lys	VUS	-23.4858	Indeterminate	0.5076	Ambiguous	-13.234	Pathogenic	0.705	Disease	0.928	Possibly damaging	0.16	Tolerated	28.7	Deleterious
p.Met54Thr	VUS	-0.000601633	Neutral	0.6814	Pathogenic	-8.513	Pathogenic	0.583	Disease	0.984	Probably damaging	0.14	Tolerated	27	Deleterious
p.Met54Arg	VUS	-24.8682	Indeterminate	0.3292	Benign	-12.135	Pathogenic	0.716	Disease	0.965	Probably damaging	0.12	Tolerated	29	Deleterious
p.Met54Ser	VUS	-0.0284053	Neutral	0.6661	Pathogenic	-9.691	Pathogenic	0.605	Disease	0.998	Probably damaging	0.13	Tolerated
p.Met54Ile	VUS	-0.306243	Neutral	0.8666	Pathogenic	-7.902	Pathogenic	0.352	Neutral	0.841	Possibly damaging	0.36	Tolerated	28.6	Deleterious
p.Met54His	VUS	-3.79163	Neutral	0.584	Pathogenic	-10.145	Pathogenic	0.624	Disease	1	Probably damaging	0.14	Tolerated
p.Met54Gln	VUS	-5.08577	Neutral	0.2563	Benign	-10.495	Pathogenic	0.582	Disease	0.999	Probably damaging	0.11	Tolerated
p.Met54Pro	VUS	-14.1682	Indeterminate	0.8247	Pathogenic	-10.814	Pathogenic	0.617	Disease	0.999	Probably damaging	0.08	Tolerated
p.Met54Leu	VUS	-0.0818272	Neutral	0.324	Benign	-5.242	Benign	0.298	Neutral	0.329	Benign	1	Tolerated	24.6	Deleterious
p.Met54Asp	VUS	-12.9268	Indeterminate	0.8666	Pathogenic	-13.157	Pathogenic	0.591	Disease	1	Probably damaging	0.13	Tolerated
p.Met54Glu	VUS	-14.1714	Indeterminate	0.6117	Pathogenic	-13.347	Pathogenic	0.591	Disease	0.999	Probably damaging	0.11	Tolerated
p.Met54Ala	VUS	-0.103141	Neutral	0.5595	Ambiguous	-8.783	Pathogenic	0.592	Disease	0.939	Possibly damaging	0.19	Tolerated
p.Met54Gly	VUS	-0.0256224	Neutral	0.6583	Pathogenic	-9.909	Pathogenic	0.596	Disease	0.999	Probably damaging	0.1	Tolerated
p.Met54Val	VUS	-0.0653621	Neutral	0.4549	Ambiguous	-6.739	Benign	0.576	Disease	0.998	Probably damaging	0.27	Tolerated	26.2	Deleterious
p.Met54Tyr	VUS	-0.820252	Neutral	0.6609	Pathogenic	-9.244	Pathogenic	0.588	Disease	0.998	Probably damaging	0.25	Tolerated
p.Met54Cys	VUS	-0.000822399	Neutral	0.8017	Pathogenic	-8.84	Pathogenic	0.604	Disease	1	Probably damaging	0.06	Tolerated
p.Met54Trp	VUS	-0.69959	Neutral	0.6948	Pathogenic	-13.352	Pathogenic	0.554	Disease	1	Probably damaging	0.06	Tolerated
p.Met54Phe	VUS	-0.0405993	Neutral	0.4123	Ambiguous	-6.986	Benign	0.388	Neutral	0.929	Possibly damaging	0.35	Tolerated
p.Gly55Asn	VUS	-53.1508	Deleterious	0.9308	Pathogenic	-12.596	Pathogenic	0.761	Disease	1	Probably damaging	0.21	Tolerated
p.Gly55Lys	VUS	-53.1508	Deleterious	0.9741	Pathogenic	-14.484	Pathogenic	0.774	Disease	1	Probably damaging	0.01	Deleterious
p.Gly55Thr	VUS	-53.1508	Deleterious	0.9206	Pathogenic	-13.28	Pathogenic	0.77	Disease	1	Probably damaging	0.01	Deleterious
p.Gly55Arg	VUS	-53.1508	Deleterious	0.9318	Pathogenic	-10.662	Pathogenic	0.783	Disease	1	Probably damaging	0.01	Deleterious	30	Deleterious
p.Gly55Ser	VUS	-31.9291	Indeterminate	0.7309	Pathogenic	-8.577	Pathogenic	0.746	Disease	0.998	Probably damaging	0.03	Deleterious	29.8	Deleterious
p.Gly55Ile	VUS	-53.1508	Deleterious	0.9786	Pathogenic	-18.906	Pathogenic	0.836	Disease	1	Probably damaging	0	Deleterious
p.Gly55Met	VUS	-53.1508	Deleterious	0.987	Pathogenic	-18.38	Pathogenic	0.827	Disease	1	Probably damaging	0	Deleterious
p.Gly55His	VUS	-53.1508	Deleterious	0.971	Pathogenic	-14.251	Pathogenic	0.786	Disease	1	Probably damaging	0.01	Deleterious
p.Gly55Gln	VUS	-53.1508	Deleterious	0.9509	Pathogenic	-14.006	Pathogenic	0.766	Disease	1	Probably damaging	0.01	Deleterious
p.Gly55Pro	VUS	-53.1508	Deleterious	0.9783	Pathogenic	-12.38	Pathogenic	0.775	Disease	0.657	Possibly damaging	0.01	Deleterious
p.Gly55Leu	VUS	-53.1508	Deleterious	0.9734	Pathogenic	-17.288	Pathogenic	0.813	Disease	1	Probably damaging	0	Deleterious
p.Gly55Asp	VUS	-53.1508	Deleterious	0.9053	Pathogenic	-11.428	Pathogenic	0.809	Disease	0.999	Probably damaging	0.04	Deleterious	29.2	Deleterious
p.Gly55Glu	VUS	-53.1508	Deleterious	0.9242	Pathogenic	-12.707	Pathogenic	0.828	Disease	1	Probably damaging	0.01	Deleterious
p.Gly55Ala	VUS	-11.0461	Indeterminate	0.6234	Pathogenic	-7.81	Pathogenic	0.792	Disease	0.989	Probably damaging	0.02	Deleterious	27.4	Deleterious
p.Gly55Val	VUS	-53.1508	Deleterious	0.9375	Pathogenic	-15.513	Pathogenic	0.885	Disease	1	Probably damaging	0	Deleterious	28.9	Deleterious
p.Gly55Tyr	VUS	-53.1508	Deleterious	0.9725	Pathogenic	-16.46	Pathogenic	0.823	Disease	1	Probably damaging	0	Deleterious
p.Gly55Cys	VUS	-53.1508	Deleterious	0.9277	Pathogenic	-12.025	Pathogenic	0.868	Disease	1	Probably damaging	0	Deleterious	32	Deleterious
p.Gly55Trp	VUS	-53.1508	Deleterious	0.9668	Pathogenic	-16.497	Pathogenic	0.859	Disease	1	Probably damaging	0	Deleterious
p.Gly55Phe	VUS	-53.1508	Deleterious	0.9875	Pathogenic	-18.261	Pathogenic	0.836	Disease	1	Probably damaging	0	Deleterious
p.Ser56Asn	VUS	-6.70804e-10	Neutral	0.2869	Benign	-3.981	Benign	0.162	Neutral	0.027	Benign	0.9	Tolerated	12.86	Neutral
p.Ser56Lys	VUS	-0.0971452	Neutral	0.925	Pathogenic	-9.819	Pathogenic	0.495	Neutral	0.989	Probably damaging	0.95	Tolerated
p.Ser56Thr	VUS	-0.470511	Neutral	0.3245	Benign	-7.236	Benign	0.392	Neutral	0.678	Possibly damaging	0.62	Tolerated	17.51	Deleterious
p.Ser56Arg	VUS	-1.41279e-06	Neutral	0.863	Pathogenic	-8.361	Pathogenic	0.558	Disease	0.999	Probably damaging	0.78	Tolerated	24.7	Deleterious
p.Ser56Ile	Pathogenic	-53.1508	Deleterious	0.8369	Pathogenic	-14.634	Pathogenic	0.566	Disease	0.999	Probably damaging	0.26	Tolerated	22.8	Deleterious
p.Ser56Met	VUS	-0.000166388	Neutral	0.7197	Pathogenic	-13.252	Pathogenic	0.537	Disease	1	Probably damaging	0.16	Tolerated
p.Ser56His	VUS	-3.27328e-06	Neutral	0.4565	Ambiguous	-5.865	Benign	0.327	Neutral	0.998	Probably damaging	0.37	Tolerated
p.Ser56Gln	VUS	-0.00463344	Neutral	0.7042	Pathogenic	-8.575	Pathogenic	0.476	Neutral	0.998	Probably damaging	0.62	Tolerated
p.Ser56Pro	VUS	-53.1508	Deleterious	0.8374	Pathogenic	-7.373	Benign	0.642	Disease	0.998	Probably damaging	0.29	Tolerated
p.Ser56Leu	VUS	-17.5293	Indeterminate	0.6522	Pathogenic	-10.784	Pathogenic	0.551	Disease	0.994	Probably damaging	0.45	Tolerated
p.Ser56Asp	VUS	-0.204811	Neutral	0.6454	Pathogenic	-8.354	Pathogenic	0.483	Neutral	0.923	Possibly damaging	0.62	Tolerated
p.Ser56Glu	VUS	-3.78793	Neutral	0.7859	Pathogenic	-9.46	Pathogenic	0.497	Neutral	0.971	Probably damaging	0.67	Tolerated
p.Ser56Ala	VUS	-0.0940051	Neutral	0.2536	Benign	-8.174	Pathogenic	0.432	Neutral	0.801	Possibly damaging	0.64	Tolerated
p.Ser56Gly	VUS	-2.34236	Neutral	0.2343	Benign	-7.26	Benign	0.436	Neutral	0.385	Benign	0.52	Tolerated	25.7	Deleterious
p.Ser56Val	VUS	-2.86428	Neutral	0.7218	Pathogenic	-11.824	Pathogenic	0.534	Disease	0.999	Probably damaging	0.36	Tolerated
p.Ser56Tyr	VUS	-0.012804	Neutral	0.5949	Pathogenic	-8.443	Pathogenic	0.532	Disease	0.999	Probably damaging	0.47	Tolerated
p.Ser56Cys	VUS	-1.12965e-05	Neutral	0.2089	Benign	-8	Pathogenic	0.299	Neutral	0.999	Probably damaging	0.12	Tolerated	27.3	Deleterious
p.Ser56Trp	VUS	-53.1508	Deleterious	0.7018	Pathogenic	-10.802	Pathogenic	0.607	Disease	1	Probably damaging	0.1	Tolerated
p.Ser56Phe	VUS	-0.0825866	Neutral	0.7895	Pathogenic	-10.423	Pathogenic	0.511	Disease	0.999	Probably damaging	0.42	Tolerated
p.Ala57Asn	VUS	-0.569206	Neutral	0.4468	Ambiguous	-8.308	Pathogenic	0.368	Neutral	0.561	Possibly damaging	0.46	Tolerated
p.Ala57Lys	VUS	-2.18019	Neutral	0.4994	Ambiguous	-10.625	Pathogenic	0.392	Neutral	0.921	Possibly damaging	0.87	Tolerated
p.Ala57Thr	VUS	-3.45434	Neutral	0.1004	Benign	-4.763	Benign	0.104	Neutral	0.011	Benign	0.56	Tolerated	5.388	Neutral
p.Ala57Arg	VUS	-0.242417	Neutral	0.319	Benign	-7.608	Pathogenic	0.388	Neutral	0.976	Probably damaging	0.49	Tolerated
p.Ala57Ser	VUS	-4.09569	Neutral	0.1098	Benign	-5.173	Benign	0.2	Neutral	0.084	Benign	0.72	Tolerated	8.118	Neutral
p.Ala57Ile	VUS	-1.12876	Neutral	0.3926	Ambiguous	-11.031	Pathogenic	0.285	Neutral	0.854	Possibly damaging	0.18	Tolerated
p.Ala57Met	VUS	-3.26607	Neutral	0.3899	Ambiguous	-10.894	Pathogenic	0.368	Neutral	0.988	Probably damaging	0.1	Tolerated
p.Ala57His	VUS	-0.00849478	Neutral	0.4664	Ambiguous	-8.742	Pathogenic	0.379	Neutral	0.999	Probably damaging	0.12	Tolerated
p.Ala57Gln	VUS	-1.66636	Neutral	0.3253	Benign	-9.504	Pathogenic	0.365	Neutral	0.988	Probably damaging	0.56	Tolerated
p.Ala57Pro	VUS	-4.87881	Neutral	0.1227	Benign	-4.004	Benign	0.181	Neutral	0.018	Benign	0.3	Tolerated	7.878	Neutral
p.Ala57Leu	VUS	-9.30317	Indeterminate	0.267	Benign	-8.905	Pathogenic	0.368	Neutral	0.706	Possibly damaging	0.29	Tolerated
p.Ala57Asp	VUS	-0.122613	Neutral	0.4412	Ambiguous	-10.511	Pathogenic	0.349	Neutral	0.701	Possibly damaging	0.62	Tolerated	18.96	Deleterious
p.Ala57Glu	VUS	-9.67444	Indeterminate	0.2968	Benign	-10.315	Pathogenic	0.32	Neutral	0.813	Possibly damaging	1	Tolerated
p.Ala57Gly	VUS	-1.13881	Neutral	0.1392	Benign	-6.096	Benign	0.322	Neutral	0.574	Possibly damaging	0.36	Tolerated	14.86	Neutral
p.Ala57Val	Benign	-0.16147	Neutral	0.1532	Benign	-7.218	Benign	0.151	Neutral	0.01	Benign	0.3	Tolerated	9.788	Neutral
p.Ala57Tyr	VUS	-15.9695	Indeterminate	0.6368	Pathogenic	-9.289	Pathogenic	0.371	Neutral	0.988	Probably damaging	0.04	Deleterious
p.Ala57Cys	VUS	-4.97124	Neutral	0.471	Ambiguous	-8.781	Pathogenic	0.256	Neutral	0.996	Probably damaging	0.05	Deleterious
p.Ala57Trp	VUS	-8.4144	Indeterminate	0.6804	Pathogenic	-11.738	Pathogenic	0.421	Neutral	0.999	Probably damaging	0.02	Deleterious
p.Ala57Phe	VUS	-15.1418	Indeterminate	0.5515	Ambiguous	-11.247	Pathogenic	0.378	Neutral	0.976	Probably damaging	0.05	Deleterious
p.Arg58Asn	VUS	-0.000371166	Neutral	0.5027	Ambiguous	-7.875	Pathogenic	0.455	Neutral	0.958	Probably damaging	0.35	Tolerated
p.Arg58Lys	VUS	-6.16981e-05	Neutral	0.1612	Benign	-5.059	Benign	0.118	Neutral	0.361	Benign	0.69	Tolerated
p.Arg58Thr	VUS	-0.0958085	Neutral	0.1907	Benign	-5.721	Benign	0.408	Neutral	0.958	Probably damaging	0.44	Tolerated
p.Arg58Ser	VUS	-0.00210036	Neutral	0.311	Benign	-4.611	Benign	0.173	Neutral	0.99	Probably damaging	0.51	Tolerated
p.Arg58Ile	VUS	-0.000397103	Neutral	0.3846	Ambiguous	-9.993	Pathogenic	0.496	Neutral	0.999	Probably damaging	0.13	Tolerated
p.Arg58Met	VUS	-0.000743264	Neutral	0.4241	Ambiguous	-8.794	Pathogenic	0.489	Neutral	0.988	Probably damaging	0.07	Tolerated
p.Arg58His	VUS	-3.06736e-05	Neutral	0.1485	Benign	-6.107	Benign	0.193	Neutral	0.011	Benign	0.13	Tolerated
p.Arg58Gln	VUS	-0.0527534	Neutral	0.1117	Benign	-4.3	Benign	0.172	Neutral	0.287	Benign	0.47	Tolerated	12.76	Neutral
p.Arg58Pro	VUS	-0.217807	Neutral	0.2054	Benign	-3.629	Benign	0.181	Neutral	0.367	Benign	0.19	Tolerated	12.91	Neutral
p.Arg58Leu	VUS	-0.00313771	Neutral	0.1855	Benign	-6.609	Benign	0.467	Neutral	0.995	Probably damaging	0.21	Tolerated	14.45	Neutral
p.Arg58Asp	VUS	-0.000229364	Neutral	0.3324	Benign	-4.882	Benign	0.477	Neutral	0.99	Probably damaging	0.54	Tolerated
p.Arg58Glu	VUS	-0.00156858	Neutral	0.203	Benign	-3.13	Benign	0.253	Neutral	0.586	Possibly damaging	1	Tolerated
p.Arg58Ala	VUS	-0.0287609	Neutral	0.1563	Benign	-2.133	Benign	0.271	Neutral	0.904	Possibly damaging	0.72	Tolerated
p.Arg58Gly	VUS	-0.0351652	Neutral	0.1835	Benign	-4.398	Benign	0.199	Neutral	0.995	Probably damaging	0.27	Tolerated	17.53	Deleterious
p.Arg58Val	VUS	-0.00423303	Neutral	0.303	Benign	-6.251	Benign	0.518	Disease	0.994	Probably damaging	0.2	Tolerated
p.Arg58Tyr	VUS	-5.89529e-06	Neutral	0.498	Ambiguous	-9.91	Pathogenic	0.449	Neutral	0.691	Possibly damaging	0.03	Deleterious
p.Arg58Cys	VUS	-0.000186342	Neutral	0.3604	Ambiguous	-7.455	Benign	0.476	Neutral	1	Probably damaging	0.04	Deleterious
p.Arg58Trp	VUS	-0.0026699	Neutral	0.282	Benign	-9.553	Pathogenic	0.479	Neutral	0.995	Probably damaging	0.01	Deleterious
p.Arg58Phe	VUS	-0.00651449	Neutral	0.5892	Pathogenic	-9.883	Pathogenic	0.519	Disease	0.819	Possibly damaging	0.04	Deleterious
p.Val59Asn	VUS	-53.1508	Deleterious	0.9093	Pathogenic	-15.232	Pathogenic	0.693	Disease	0.999	Probably damaging	0	Deleterious
p.Val59Lys	VUS	-53.1508	Deleterious	0.9586	Pathogenic	-16.149	Pathogenic	0.748	Disease	0.861	Possibly damaging	0	Deleterious
p.Val59Thr	VUS	-0.211929	Neutral	0.4091	Ambiguous	-8.593	Pathogenic	0.47	Neutral	0.999	Probably damaging	0.01	Deleterious
p.Val59Arg	VUS	-53.1508	Deleterious	0.9158	Pathogenic	-14.3	Pathogenic	0.745	Disease	0.262	Benign	0	Deleterious
p.Val59Ser	VUS	-4.70041	Neutral	0.7444	Pathogenic	-10.493	Pathogenic	0.677	Disease	0.999	Probably damaging	0	Deleterious
p.Val59Ile	VUS	-0.163545	Neutral	0.1519	Benign	-7.733	Pathogenic	0.245	Neutral	0.315	Benign	0.93	Tolerated
p.Val59Met	VUS	-1.54525	Neutral	0.6448	Pathogenic	-9.242	Pathogenic	0.42	Neutral	0.563	Possibly damaging	0.01	Deleterious	21.9	Deleterious
p.Val59His	VUS	-53.1508	Deleterious	0.979	Pathogenic	-15.47	Pathogenic	0.677	Disease	0.999	Probably damaging	0	Deleterious
p.Val59Gln	VUS	-53.1508	Deleterious	0.905	Pathogenic	-14.466	Pathogenic	0.72	Disease	0.969	Probably damaging	0	Deleterious
p.Val59Pro	VUS	-53.1508	Deleterious	0.8617	Pathogenic	-12.365	Pathogenic	0.711	Disease	1	Probably damaging	0	Deleterious
p.Val59Leu	VUS	-4.3722	Neutral	0.6958	Pathogenic	-9.839	Pathogenic	0.34	Neutral	0.257	Benign	0.14	Tolerated	16.58	Deleterious
p.Val59Asp	VUS	-53.1508	Deleterious	0.959	Pathogenic	-14.031	Pathogenic	0.786	Disease	1	Probably damaging	0	Deleterious
p.Val59Glu	VUS	-53.1508	Deleterious	0.8776	Pathogenic	-12.839	Pathogenic	0.824	Disease	0.996	Probably damaging	0	Deleterious	24.4	Deleterious
p.Val59Ala	VUS	-5.42521	Neutral	0.4051	Ambiguous	-6.676	Benign	0.587	Disease	0.996	Probably damaging	0.01	Deleterious	23.8	Deleterious
p.Val59Gly	Pathogenic	-33.2172	Indeterminate	0.6413	Pathogenic	-11.202	Pathogenic	0.597	Disease	1	Probably damaging	0	Deleterious	24.3	Deleterious
p.Val59Tyr	VUS	-53.1508	Deleterious	0.9861	Pathogenic	-16.569	Pathogenic	0.69	Disease	0.998	Probably damaging	0.01	Deleterious
p.Val59Cys	VUS	-0.944072	Neutral	0.9254	Pathogenic	-8.709	Pathogenic	0.635	Disease	1	Probably damaging	0	Deleterious
p.Val59Trp	VUS	-53.1508	Deleterious	0.9946	Pathogenic	-17.035	Pathogenic	0.65	Disease	1	Probably damaging	0	Deleterious
p.Val59Phe	VUS	-53.1508	Deleterious	0.8967	Pathogenic	-15.448	Pathogenic	0.739	Disease	0.989	Probably damaging	0.01	Deleterious
p.Ala60Asn	VUS	-53.1508	Deleterious	0.9602	Pathogenic	-17.643	Pathogenic	0.717	Disease	0.983	Probably damaging	0.01	Deleterious
p.Ala60Lys	VUS	-53.1508	Deleterious	0.9921	Pathogenic	-19.214	Pathogenic	0.764	Disease	0.992	Probably damaging	0.01	Deleterious
p.Ala60Thr	VUS	-1.18249	Neutral	0.3475	Ambiguous	-7.215	Benign	0.622	Disease	0.986	Probably damaging	0.04	Deleterious	25.8	Deleterious
p.Ala60Arg	VUS	-53.1508	Deleterious	0.9613	Pathogenic	-15.848	Pathogenic	0.733	Disease	0.999	Probably damaging	0.01	Deleterious
p.Ala60Ser	VUS	-14.38	Indeterminate	0.3268	Benign	-8.42	Pathogenic	0.624	Disease	0.792	Possibly damaging	0.03	Deleterious	25.1	Deleterious
p.Ala60Ile	VUS	-22.5182	Indeterminate	0.8372	Pathogenic	-11.439	Pathogenic	0.738	Disease	1	Probably damaging	0.04	Deleterious
p.Ala60Met	VUS	-2.93996	Neutral	0.7943	Pathogenic	-10.804	Pathogenic	0.676	Disease	1	Probably damaging	0.01	Deleterious
p.Ala60His	VUS	-33.1783	Indeterminate	0.9832	Pathogenic	-18.015	Pathogenic	0.741	Disease	1	Probably damaging	0	Deleterious
p.Ala60Gln	VUS	-53.1508	Deleterious	0.9314	Pathogenic	-16.749	Pathogenic	0.737	Disease	0.958	Probably damaging	0.01	Deleterious
p.Ala60Pro	VUS	-18.8591	Indeterminate	0.9469	Pathogenic	-10.862	Pathogenic	0.8	Disease	0.999	Probably damaging	0.02	Deleterious	25.7	Deleterious
p.Ala60Leu	VUS	-2.50621	Neutral	0.6467	Pathogenic	-8.428	Pathogenic	0.686	Disease	0.998	Probably damaging	0.03	Deleterious
p.Ala60Asp	VUS	-33.2193	Indeterminate	0.9837	Pathogenic	-16.663	Pathogenic	0.843	Disease	0.996	Probably damaging	0.01	Deleterious
p.Ala60Glu	Likely pathogenic	-33.2193	Indeterminate	0.962	Pathogenic	-15.147	Pathogenic	0.788	Disease	0.989	Probably damaging	0.01	Deleterious	25.4	Deleterious
p.Ala60Gly	VUS	-1.98451	Neutral	0.3107	Benign	-8.996	Pathogenic	0.62	Disease	0.997	Probably damaging	0.03	Deleterious	26.2	Deleterious
p.Ala60Val	VUS	-5.18041	Neutral	0.4418	Ambiguous	-7.311	Benign	0.491	Neutral	0.999	Probably damaging	0.37	Tolerated	25.8	Deleterious
p.Ala60Tyr	VUS	-53.1508	Deleterious	0.9901	Pathogenic	-17.635	Pathogenic	0.75	Disease	1	Probably damaging	0	Deleterious
p.Ala60Cys	VUS	-7.25614	Indeterminate	0.6622	Pathogenic	-8.737	Pathogenic	0.668	Disease	1	Probably damaging	0.01	Deleterious
p.Ala60Trp	VUS	-53.1508	Deleterious	0.9927	Pathogenic	-15.468	Pathogenic	0.787	Disease	1	Probably damaging	0	Deleterious
p.Ala60Phe	VUS	-53.1508	Deleterious	0.9672	Pathogenic	-13.943	Pathogenic	0.737	Disease	1	Probably damaging	0.01	Deleterious
p.Glu61Asn	VUS	-1.02324	Neutral	0.7007	Pathogenic	-10.249	Pathogenic	0.412	Neutral	0.734	Possibly damaging	0.48	Tolerated
p.Glu61Lys	VUS	-0.201271	Neutral	0.3723	Ambiguous	-9.294	Pathogenic	0.232	Neutral	0.122	Benign	0.89	Tolerated	11.1	Neutral
p.Glu61Thr	VUS	-0.311111	Neutral	0.5214	Ambiguous	-8.088	Pathogenic	0.315	Neutral	0.787	Possibly damaging	0.52	Tolerated
p.Glu61Arg	VUS	-4.80138	Neutral	0.2715	Benign	-6.993	Benign	0.23	Neutral	0.003	Benign	0.52	Tolerated
p.Glu61Ser	VUS	-1.61827	Neutral	0.3724	Ambiguous	-6.912	Benign	0.291	Neutral	0.586	Possibly damaging	0.66	Tolerated
p.Glu61Ile	VUS	-2.46436	Neutral	0.8797	Pathogenic	-12.013	Pathogenic	0.501	Disease	0.748	Possibly damaging	0.17	Tolerated
p.Glu61Met	VUS	-2.35415	Neutral	0.8462	Pathogenic	-10.236	Pathogenic	0.54	Disease	0.618	Possibly damaging	0.1	Tolerated
p.Glu61His	VUS	-1.51223	Neutral	0.5801	Pathogenic	-8.601	Pathogenic	0.394	Neutral	0.819	Possibly damaging	0.11	Tolerated
p.Glu61Gln	VUS	-0.253165	Neutral	0.1632	Benign	-6.323	Benign	0.128	Neutral	0.018	Benign	0.53	Tolerated	7.744	Neutral
p.Glu61Pro	VUS	-53.1508	Deleterious	0.9409	Pathogenic	-13.417	Pathogenic	0.517	Disease	0.863	Possibly damaging	0.25	Tolerated
p.Glu61Leu	VUS	-0.265412	Neutral	0.7588	Pathogenic	-8.933	Pathogenic	0.38	Neutral	0.294	Benign	0.31	Tolerated
p.Glu61Asp	VUS	-0.831958	Neutral	0.4425	Ambiguous	-7.212	Benign	0.33	Neutral	0.216	Benign	0.6	Tolerated	12.29	Neutral
p.Glu61Ala	VUS	-0.6227	Neutral	0.2695	Benign	-6.582	Benign	0.193	Neutral	0.026	Benign	0.72	Tolerated	13.52	Neutral
p.Glu61Gly	VUS	-0.432411	Neutral	0.2971	Benign	-8.008	Pathogenic	0.384	Neutral	0.022	Benign	0.34	Tolerated	18.67	Deleterious
p.Glu61Val	VUS	-0.345727	Neutral	0.6779	Pathogenic	-9.71	Pathogenic	0.312	Neutral	0.183	Benign	0.26	Tolerated	17.51	Deleterious
p.Glu61Tyr	VUS	-4.64108	Neutral	0.871	Pathogenic	-12.657	Pathogenic	0.498	Neutral	0.981	Probably damaging	0.04	Deleterious
p.Glu61Cys	VUS	-0.541062	Neutral	0.9517	Pathogenic	-10.31	Pathogenic	0.527	Disease	1	Probably damaging	0.05	Deleterious
p.Glu61Trp	VUS	-1.42344	Neutral	0.9523	Pathogenic	-11.631	Pathogenic	0.549	Disease	0.995	Probably damaging	0.02	Deleterious
p.Glu61Phe	VUS	-2.00202	Neutral	0.9411	Pathogenic	-12.682	Pathogenic	0.513	Disease	0.951	Possibly damaging	0.05	Deleterious
p.Leu62Asn	VUS	-0.000187572	Neutral	0.8298	Pathogenic	-13.592	Pathogenic	0.678	Disease	1	Probably damaging	0.09	Tolerated
p.Leu62Lys	VUS	-1.23729	Neutral	0.7361	Pathogenic	-12.176	Pathogenic	0.694	Disease	0.437	Benign	0.36	Tolerated
p.Leu62Thr	VUS	-0.185512	Neutral	0.5488	Ambiguous	-7.197	Benign	0.638	Disease	1	Probably damaging	0.14	Tolerated
p.Leu62Arg	VUS	-28.5809	Indeterminate	0.5057	Ambiguous	-10.437	Pathogenic	0.686	Disease	0.982	Probably damaging	0.31	Tolerated	24.2	Deleterious
p.Leu62Ser	VUS	-0.0481455	Neutral	0.8354	Pathogenic	-9.566	Pathogenic	0.701	Disease	1	Probably damaging	0.11	Tolerated
p.Leu62Ile	VUS	-7.52304	Indeterminate	0.1772	Benign	-7.867	Pathogenic	0.275	Neutral	0.993	Probably damaging	0.37	Tolerated
p.Leu62Met	VUS	-5.60544e-05	Neutral	0.2382	Benign	-7.242	Benign	0.433	Neutral	1	Probably damaging	0.21	Tolerated	23	Deleterious
p.Leu62His	VUS	-1.50494e-08	Neutral	0.6562	Pathogenic	-8.783	Pathogenic	0.694	Disease	1	Probably damaging	0.08	Tolerated
p.Leu62Gln	VUS	-29.4456	Indeterminate	0.4796	Ambiguous	-7.671	Pathogenic	0.693	Disease	0.989	Probably damaging	0.17	Tolerated	25.7	Deleterious
p.Leu62Pro	VUS	-13.2773	Indeterminate	0.9602	Pathogenic	-12.348	Pathogenic	0.825	Disease	1	Probably damaging	0.09	Tolerated	26	Deleterious
p.Leu62Asp	VUS	-0.0442619	Neutral	0.8998	Pathogenic	-9.236	Pathogenic	0.681	Disease	1	Probably damaging	0.07	Tolerated
p.Leu62Glu	VUS	-0.0763014	Neutral	0.5869	Pathogenic	-4.513	Benign	0.678	Disease	0.999	Probably damaging	0.21	Tolerated
p.Leu62Ala	VUS	-0.0122222	Neutral	0.5589	Ambiguous	-5.183	Benign	0.463	Neutral	1	Probably damaging	0.19	Tolerated
p.Leu62Gly	VUS	-4.08662	Neutral	0.8549	Pathogenic	-11.876	Pathogenic	0.625	Disease	1	Probably damaging	0.07	Tolerated
p.Leu62Val	VUS	-0.179755	Neutral	0.1734	Benign	-4.375	Benign	0.262	Neutral	0.946	Possibly damaging	0.29	Tolerated	19.78	Deleterious
p.Leu62Tyr	VUS	-8.39315	Indeterminate	0.5464	Ambiguous	-8.732	Pathogenic	0.611	Disease	0.982	Probably damaging	0.08	Tolerated
p.Leu62Cys	VUS	-5.14804	Neutral	0.7386	Pathogenic	-8.673	Pathogenic	0.588	Disease	1	Probably damaging	0.03	Deleterious
p.Leu62Trp	VUS	-0.000370481	Neutral	0.543	Ambiguous	-10.966	Pathogenic	0.634	Disease	1	Probably damaging	0.03	Deleterious
p.Leu62Phe	VUS	-5.96778e-06	Neutral	0.4535	Ambiguous	-8.476	Pathogenic	0.471	Neutral	0.998	Probably damaging	0.19	Tolerated
p.Leu63Asn	VUS	-53.1508	Deleterious	0.9953	Pathogenic	-17.75	Pathogenic	0.836	Disease	1	Probably damaging	0	Deleterious
p.Leu63Lys	VUS	-53.1508	Deleterious	0.9902	Pathogenic	-18.239	Pathogenic	0.824	Disease	0.99	Probably damaging	0	Deleterious
p.Leu63Thr	VUS	-53.1508	Deleterious	0.9863	Pathogenic	-13.924	Pathogenic	0.844	Disease	1	Probably damaging	0	Deleterious
p.Leu63Arg	VUS	-53.1508	Deleterious	0.9585	Pathogenic	-13.955	Pathogenic	0.931	Disease	0.999	Probably damaging	0	Deleterious	27.6	Deleterious
p.Leu63Ser	VUS	-53.1508	Deleterious	0.9945	Pathogenic	-12.868	Pathogenic	0.923	Disease	1	Probably damaging	0	Deleterious
p.Leu63Ile	VUS	-5.21352	Neutral	0.7278	Pathogenic	-10.803	Pathogenic	0.698	Disease	0.998	Probably damaging	0	Deleterious
p.Leu63Met	VUS	-0.302138	Neutral	0.7228	Pathogenic	-9.016	Pathogenic	0.756	Disease	1	Probably damaging	0	Deleterious	25.2	Deleterious
p.Leu63His	VUS	-53.1508	Deleterious	0.9796	Pathogenic	-14.325	Pathogenic	0.906	Disease	1	Probably damaging	0	Deleterious
p.Leu63Gln	VUS	-53.1508	Deleterious	0.9753	Pathogenic	-14.729	Pathogenic	0.926	Disease	1	Probably damaging	0	Deleterious	27.1	Deleterious
p.Leu63Pro	VUS	-53.1508	Deleterious	0.9779	Pathogenic	-11.69	Pathogenic	0.927	Disease	1	Probably damaging	0	Deleterious	27.8	Deleterious
p.Leu63Asp	VUS	-53.1508	Deleterious	0.9988	Pathogenic	-17.883	Pathogenic	0.835	Disease	1	Probably damaging	0	Deleterious
p.Leu63Glu	VUS	-53.1508	Deleterious	0.9929	Pathogenic	-17.558	Pathogenic	0.853	Disease	1	Probably damaging	0	Deleterious
p.Leu63Ala	VUS	-53.1508	Deleterious	0.9699	Pathogenic	-12.36	Pathogenic	0.831	Disease	1	Probably damaging	0	Deleterious
p.Leu63Gly	VUS	-53.1508	Deleterious	0.9899	Pathogenic	-16.363	Pathogenic	0.862	Disease	1	Probably damaging	0	Deleterious
p.Leu63Val	VUS	-53.1508	Deleterious	0.7804	Pathogenic	-10.786	Pathogenic	0.83	Disease	0.994	Probably damaging	0	Deleterious	25	Deleterious
p.Leu63Tyr	VUS	-53.1508	Deleterious	0.9691	Pathogenic	-15.353	Pathogenic	0.821	Disease	0.994	Probably damaging	0	Deleterious
p.Leu63Cys	VUS	-53.1508	Deleterious	0.9661	Pathogenic	-12.614	Pathogenic	0.793	Disease	1	Probably damaging	0	Deleterious
p.Leu63Trp	VUS	-53.1508	Deleterious	0.9618	Pathogenic	-14.787	Pathogenic	0.87	Disease	1	Probably damaging	0	Deleterious
p.Leu63Phe	VUS	-33.1665	Indeterminate	0.768	Pathogenic	-9.885	Pathogenic	0.814	Disease	0.999	Probably damaging	0	Deleterious
p.Leu64Asn	VUS	-11.0702	Indeterminate	0.9826	Pathogenic	-17.641	Pathogenic	0.801	Disease	1	Probably damaging	0	Deleterious
p.Leu64Lys	VUS	-2.26656	Neutral	0.9752	Pathogenic	-17.215	Pathogenic	0.799	Disease	0.994	Probably damaging	0	Deleterious
p.Leu64Thr	VUS	-0.600382	Neutral	0.8919	Pathogenic	-12.338	Pathogenic	0.827	Disease	1	Probably damaging	0.01	Deleterious
p.Leu64Arg	VUS	-2.36745	Neutral	0.89	Pathogenic	-13.68	Pathogenic	0.878	Disease	0.999	Probably damaging	0	Deleterious	27.7	Deleterious
p.Leu64Ser	VUS	-0.647429	Neutral	0.9742	Pathogenic	-12.854	Pathogenic	0.902	Disease	1	Probably damaging	0	Deleterious
p.Leu64Ile	VUS	-10.1558	Indeterminate	0.2904	Benign	-7.109	Benign	0.552	Disease	0.998	Probably damaging	0.04	Deleterious
p.Leu64Met	VUS	-1.55563	Neutral	0.5884	Pathogenic	-8.326	Pathogenic	0.68	Disease	1	Probably damaging	0.02	Deleterious	25.3	Deleterious
p.Leu64His	VUS	-2.25137	Neutral	0.9626	Pathogenic	-15.141	Pathogenic	0.862	Disease	1	Probably damaging	0	Deleterious
p.Leu64Gln	VUS	-5.58135	Neutral	0.944	Pathogenic	-13.806	Pathogenic	0.871	Disease	1	Probably damaging	0	Deleterious	27.2	Deleterious
p.Leu64Pro	VUS	-53.1508	Deleterious	0.9709	Pathogenic	-13.506	Pathogenic	0.866	Disease	1	Probably damaging	0	Deleterious	27.8	Deleterious
p.Leu64Asp	VUS	-17.6467	Indeterminate	0.997	Pathogenic	-17.529	Pathogenic	0.81	Disease	1	Probably damaging	0	Deleterious
p.Leu64Glu	VUS	-7.31873	Indeterminate	0.9826	Pathogenic	-16.636	Pathogenic	0.827	Disease	1	Probably damaging	0	Deleterious
p.Leu64Ala	VUS	-1.79083	Neutral	0.8713	Pathogenic	-11.115	Pathogenic	0.808	Disease	1	Probably damaging	0.01	Deleterious
p.Leu64Gly	VUS	-4.23495	Neutral	0.9676	Pathogenic	-13.741	Pathogenic	0.819	Disease	1	Probably damaging	0	Deleterious
p.Leu64Val	VUS	-0.618289	Neutral	0.3207	Benign	-8.367	Pathogenic	0.692	Disease	0.996	Probably damaging	0.15	Tolerated	25	Deleterious
p.Leu64Tyr	VUS	-1.40589	Neutral	0.9719	Pathogenic	-15.938	Pathogenic	0.79	Disease	0.996	Probably damaging	0	Deleterious
p.Leu64Cys	VUS	-0.829728	Neutral	0.9069	Pathogenic	-10.919	Pathogenic	0.757	Disease	1	Probably damaging	0	Deleterious
p.Leu64Trp	VUS	-0.997579	Neutral	0.9526	Pathogenic	-14.375	Pathogenic	0.806	Disease	1	Probably damaging	0	Deleterious
p.Leu64Phe	VUS	-0.190864	Neutral	0.8411	Pathogenic	-11.58	Pathogenic	0.738	Disease	1	Probably damaging	0.02	Deleterious
p.Leu65Asn	VUS	-12.0443	Indeterminate	0.3576	Ambiguous	-7.545	Pathogenic	0.33	Neutral	1	Probably damaging	0.54	Tolerated
p.Leu65Lys	VUS	-0.287994	Neutral	0.1691	Benign	-5.4	Benign	0.318	Neutral	0.968	Probably damaging	1	Tolerated
p.Leu65Thr	VUS	-3.3529	Neutral	0.1612	Benign	-5.99	Benign	0.282	Neutral	1	Probably damaging	0.75	Tolerated
p.Leu65Arg	VUS	-0.662527	Neutral	0.0718	Benign	-2.325	Benign	0.237	Neutral	0.997	Probably damaging	0.6	Tolerated	17.13	Deleterious
p.Leu65Ser	VUS	-2.82951	Neutral	0.1969	Benign	-4.676	Benign	0.21	Neutral	1	Probably damaging	0.86	Tolerated
p.Leu65Ile	VUS	-1.68723	Neutral	0.1806	Benign	-8.578	Pathogenic	0.205	Neutral	0.17	Benign	0.21	Tolerated	17.98	Deleterious
p.Leu65Met	VUS	-0.206482	Neutral	0.1757	Benign	-7.285	Benign	0.36	Neutral	1	Probably damaging	0.12	Tolerated
p.Leu65His	VUS	-10.9262	Indeterminate	0.1732	Benign	-4.991	Benign	0.37	Neutral	1	Probably damaging	0.16	Tolerated	22.5	Deleterious
p.Leu65Gln	VUS	-3.83993	Neutral	0.0746	Benign	-2.313	Benign	0.194	Neutral	1	Probably damaging	0.61	Tolerated
p.Leu65Pro	Likely pathogenic	-53.1508	Deleterious	0.7377	Pathogenic	-9.738	Pathogenic	0.314	Neutral	1	Probably damaging	0.3	Tolerated	22.6	Deleterious
p.Leu65Asp	VUS	-0.817453	Neutral	0.4034	Ambiguous	-5.281	Benign	0.327	Neutral	1	Probably damaging	0.62	Tolerated
p.Leu65Glu	VUS	-0.419357	Neutral	0.1215	Benign	-3.102	Benign	0.263	Neutral	1	Probably damaging	0.98	Tolerated
p.Leu65Ala	VUS	-4.45819	Neutral	0.1044	Benign	-2.867	Benign	0.273	Neutral	1	Probably damaging	0.78	Tolerated
p.Leu65Gly	VUS	-8.22285	Indeterminate	0.2405	Benign	-5.062	Benign	0.428	Neutral	1	Probably damaging	0.4	Tolerated
p.Leu65Val	VUS	-2.0835	Neutral	0.1378	Benign	-6.098	Benign	0.197	Neutral	0.617	Possibly damaging	0.31	Tolerated	16.61	Deleterious
p.Leu65Tyr	VUS	-1.23338	Neutral	0.3546	Ambiguous	-8.872	Pathogenic	0.377	Neutral	0.98	Probably damaging	0.09	Tolerated
p.Leu65Cys	VUS	-13.1349	Indeterminate	0.4305	Ambiguous	-6.236	Benign	0.3	Neutral	1	Probably damaging	0.07	Tolerated
p.Leu65Trp	VUS	-7.7321	Indeterminate	0.2329	Benign	-7.168	Benign	0.432	Neutral	1	Probably damaging	0.03	Deleterious
p.Leu65Phe	VUS	-1.85201	Neutral	0.1992	Benign	-9.096	Pathogenic	0.28	Neutral	0.99	Probably damaging	0.08	Tolerated	22.6	Deleterious
p.His66Asn	VUS	-0.164934	Neutral	0.3884	Ambiguous	-7.582	Pathogenic	0.259	Neutral	0.995	Probably damaging	0.04	Deleterious	22.9	Deleterious
p.His66Lys	VUS	-0.183196	Neutral	0.5891	Pathogenic	-6.905	Benign	0.301	Neutral	0.604	Possibly damaging	0.16	Tolerated
p.His66Thr	VUS	-2.36179	Neutral	0.7957	Pathogenic	-8.869	Pathogenic	0.485	Neutral	0.985	Probably damaging	0.05	Deleterious
p.His66Arg	VUS	-1.93155	Neutral	0.1748	Benign	-4.292	Benign	0.174	Neutral	0.007	Benign	0.41	Tolerated	22.9	Deleterious
p.His66Ser	VUS	-0.928411	Neutral	0.5326	Ambiguous	-5.19	Benign	0.279	Neutral	0.999	Probably damaging	0.04	Deleterious
p.His66Ile	VUS	-7.6633	Indeterminate	0.8784	Pathogenic	-12.432	Pathogenic	0.507	Disease	0.985	Probably damaging	0.03	Deleterious
p.His66Met	VUS	-0.238401	Neutral	0.8768	Pathogenic	-8.276	Pathogenic	0.473	Neutral	0.996	Probably damaging	0.02	Deleterious
p.His66Gln	VUS	-1.10376	Neutral	0.4119	Ambiguous	-6.279	Benign	0.236	Neutral	0.989	Probably damaging	0.29	Tolerated	22.85	Deleterious
p.His66Pro	VUS	-53.1508	Deleterious	0.7036	Pathogenic	-10.868	Pathogenic	0.505	Disease	1	Probably damaging	0.03	Deleterious	25	Deleterious
p.His66Leu	VUS	-1.54967	Neutral	0.467	Ambiguous	-6.672	Benign	0.279	Neutral	0.697	Possibly damaging	0.06	Tolerated	23.4	Deleterious
p.His66Asp	VUS	-1.70277	Neutral	0.7664	Pathogenic	-8.817	Pathogenic	0.466	Neutral	0.995	Probably damaging	0.02	Deleterious	24	Deleterious
p.His66Glu	VUS	-3.11969	Neutral	0.6101	Pathogenic	-6.339	Benign	0.429	Neutral	0.995	Probably damaging	0.05	Deleterious
p.His66Ala	VUS	-2.14574	Neutral	0.4953	Ambiguous	-2.592	Benign	0.312	Neutral	0.999	Probably damaging	0.05	Deleterious
p.His66Gly	VUS	-0.744785	Neutral	0.5323	Ambiguous	-5.551	Benign	0.457	Neutral	0.999	Probably damaging	0.04	Deleterious
p.His66Val	VUS	-5.55033	Neutral	0.735	Pathogenic	-7.998	Pathogenic	0.463	Neutral	1	Probably damaging	0.04	Deleterious
p.His66Tyr	VUS	-1.24333	Neutral	0.1475	Benign	-5.713	Benign	0.25	Neutral	0.952	Possibly damaging	0.54	Tolerated	18.56	Deleterious
p.His66Cys	VUS	-0.00585881	Neutral	0.3504	Ambiguous	-7.062	Benign	0.46	Neutral	1	Probably damaging	0.01	Deleterious
p.His66Trp	VUS	-0.250486	Neutral	0.4002	Ambiguous	-6.007	Benign	0.495	Neutral	0.999	Probably damaging	0.02	Deleterious
p.His66Phe	VUS	-0.695831	Neutral	0.4537	Ambiguous	-7.031	Benign	0.436	Neutral	0.989	Probably damaging	0.05	Deleterious
p.Gly67Asn	VUS	-0.13376	Neutral	0.7348	Pathogenic	-10.554	Pathogenic	0.661	Disease	1	Probably damaging	0	Deleterious
p.Gly67Lys	VUS	-0.883124	Neutral	0.7226	Pathogenic	-10.78	Pathogenic	0.686	Disease	1	Probably damaging	0	Deleterious
p.Gly67Thr	VUS	-9.71202	Indeterminate	0.7928	Pathogenic	-13.004	Pathogenic	0.662	Disease	1	Probably damaging	0	Deleterious
p.Gly67Arg	VUS	-0.00244498	Neutral	0.5034	Ambiguous	-8.24	Pathogenic	0.759	Disease	1	Probably damaging	0	Deleterious	28.2	Deleterious
p.Gly67Ser	VUS	-0.0655662	Neutral	0.4193	Ambiguous	-9.718	Pathogenic	0.68	Disease	1	Probably damaging	0	Deleterious	27.9	Deleterious
p.Gly67Ile	VUS	-53.1508	Deleterious	0.9677	Pathogenic	-17.56	Pathogenic	0.719	Disease	1	Probably damaging	0	Deleterious
p.Gly67Met	VUS	-2.61528	Neutral	0.9648	Pathogenic	-14.645	Pathogenic	0.73	Disease	1	Probably damaging	0	Deleterious
p.Gly67His	VUS	-0.0136272	Neutral	0.687	Pathogenic	-9.443	Pathogenic	0.701	Disease	1	Probably damaging	0	Deleterious
p.Gly67Gln	VUS	-0.000847932	Neutral	0.6087	Pathogenic	-10.714	Pathogenic	0.668	Disease	1	Probably damaging	0	Deleterious
p.Gly67Pro	VUS	-53.1508	Deleterious	0.9938	Pathogenic	-15.585	Pathogenic	0.663	Disease	1	Probably damaging	0	Deleterious
p.Gly67Leu	VUS	-0.434606	Neutral	0.9284	Pathogenic	-12.851	Pathogenic	0.712	Disease	1	Probably damaging	0	Deleterious
p.Gly67Asp	VUS	-0.21863	Neutral	0.4936	Ambiguous	-9.882	Pathogenic	0.742	Disease	1	Probably damaging	0	Deleterious	26.1	Deleterious
p.Gly67Glu	VUS	-0.166618	Neutral	0.7102	Pathogenic	-11.054	Pathogenic	0.755	Disease	1	Probably damaging	0	Deleterious
p.Gly67Ala	VUS	-0.00180966	Neutral	0.5522	Ambiguous	-9.563	Pathogenic	0.488	Neutral	0.997	Probably damaging	0	Deleterious	25	Deleterious
p.Gly67Val	VUS	-53.1508	Deleterious	0.9212	Pathogenic	-13.261	Pathogenic	0.807	Disease	1	Probably damaging	0	Deleterious	25.9	Deleterious
p.Gly67Tyr	VUS	-0.16682	Neutral	0.9176	Pathogenic	-13.909	Pathogenic	0.729	Disease	1	Probably damaging	0	Deleterious
p.Gly67Cys	VUS	-1.95584	Neutral	0.7922	Pathogenic	-11.774	Pathogenic	0.562	Disease	1	Probably damaging	0	Deleterious	29.3	Deleterious
p.Gly67Trp	VUS	-5.92128	Indeterminate	0.9304	Pathogenic	-13.322	Pathogenic	0.754	Disease	1	Probably damaging	0	Deleterious
p.Gly67Phe	VUS	-1.32414	Neutral	0.9653	Pathogenic	-14.694	Pathogenic	0.723	Disease	1	Probably damaging	0	Deleterious
p.Ala68Asn	VUS	-53.1508	Deleterious	0.9679	Pathogenic	-18.242	Pathogenic	0.747	Disease	0.996	Probably damaging	0	Deleterious
p.Ala68Lys	VUS	-53.1508	Deleterious	0.9925	Pathogenic	-22.221	Pathogenic	0.779	Disease	1	Probably damaging	0	Deleterious
p.Ala68Thr	VUS	-2.88289	Neutral	0.5914	Pathogenic	-11.272	Pathogenic	0.727	Disease	0.999	Probably damaging	0	Deleterious	26.2	Deleterious
p.Ala68Arg	VUS	-53.1508	Deleterious	0.9558	Pathogenic	-20.107	Pathogenic	0.761	Disease	1	Probably damaging	0	Deleterious
p.Ala68Ser	VUS	-0.589716	Neutral	0.293	Benign	-10.098	Pathogenic	0.541	Disease	0.989	Probably damaging	0	Deleterious	25.5	Deleterious
p.Ala68Ile	VUS	-53.1508	Deleterious	0.9189	Pathogenic	-17.353	Pathogenic	0.779	Disease	1	Probably damaging	0	Deleterious
p.Ala68Met	VUS	-33.1738	Indeterminate	0.9229	Pathogenic	-16.44	Pathogenic	0.718	Disease	1	Probably damaging	0	Deleterious
p.Ala68His	VUS	-24.8816	Indeterminate	0.9743	Pathogenic	-19.039	Pathogenic	0.785	Disease	1	Probably damaging	0	Deleterious
p.Ala68Gln	VUS	-53.1508	Deleterious	0.9384	Pathogenic	-18.209	Pathogenic	0.766	Disease	1	Probably damaging	0	Deleterious
p.Ala68Pro	VUS	-53.1508	Deleterious	0.9539	Pathogenic	-15.218	Pathogenic	0.815	Disease	1	Probably damaging	0	Deleterious	26.3	Deleterious
p.Ala68Leu	Likely pathogenic	-53.1508	Deleterious	0.8086	Pathogenic	-16.575	Pathogenic	0.764	Disease	1	Probably damaging	0	Deleterious
p.Ala68Asp	VUS	-32.9461	Indeterminate	0.9549	Pathogenic	-15.958	Pathogenic	0.838	Disease	1	Probably damaging	0	Deleterious
p.Ala68Glu	VUS	-32.0173	Indeterminate	0.9619	Pathogenic	-16.6	Pathogenic	0.811	Disease	1	Probably damaging	0	Deleterious	25.7	Deleterious
p.Ala68Gly	VUS	-1.38052	Neutral	0.3176	Benign	-8.949	Pathogenic	0.623	Disease	0.999	Probably damaging	0	Deleterious	26	Deleterious
p.Ala68Val	VUS	-9.99991	Indeterminate	0.676	Pathogenic	-10.832	Pathogenic	0.699	Disease	1	Probably damaging	0	Deleterious	26.1	Deleterious
p.Ala68Tyr	VUS	-53.1508	Deleterious	0.9825	Pathogenic	-19.507	Pathogenic	0.783	Disease	1	Probably damaging	0	Deleterious
p.Ala68Cys	VUS	-0.835593	Neutral	0.7551	Pathogenic	-11.433	Pathogenic	0.697	Disease	1	Probably damaging	0	Deleterious
p.Ala68Trp	VUS	-53.1508	Deleterious	0.9882	Pathogenic	-19.708	Pathogenic	0.775	Disease	1	Probably damaging	0	Deleterious
p.Ala68Phe	VUS	-53.1508	Deleterious	0.9666	Pathogenic	-18.415	Pathogenic	0.789	Disease	1	Probably damaging	0	Deleterious
p.Glu69Asn	VUS	-53.1508	Deleterious	0.3183	Benign	-3.888	Benign	0.208	Neutral	0.043	Benign	1	Tolerated
p.Glu69Lys	VUS	-32.9955	Indeterminate	0.472	Ambiguous	-9.745	Pathogenic	0.251	Neutral	0	Benign	0.49	Tolerated	22	Deleterious
p.Glu69Thr	VUS	-9.92885	Indeterminate	0.4956	Ambiguous	-8.387	Pathogenic	0.325	Neutral	0.108	Benign	0.22	Tolerated
p.Glu69Arg	VUS	-1.74833	Neutral	0.3922	Ambiguous	-8.308	Pathogenic	0.241	Neutral	0.014	Benign	0.18	Tolerated
p.Glu69Ser	VUS	-13.9258	Indeterminate	0.3272	Benign	-5.694	Benign	0.334	Neutral	0.044	Benign	0.51	Tolerated
p.Glu69Ile	VUS	-3.57062	Neutral	0.7085	Pathogenic	-11.52	Pathogenic	0.368	Neutral	0.089	Benign	0.06	Tolerated
p.Glu69Met	VUS	-30.6648	Indeterminate	0.7565	Pathogenic	-10.827	Pathogenic	0.381	Neutral	0.166	Benign	0.04	Deleterious
p.Glu69His	VUS	-7.5124	Indeterminate	0.5094	Ambiguous	-6.311	Benign	0.302	Neutral	0.129	Benign	0.09	Tolerated
p.Glu69Gln	VUS	-6.50853	Indeterminate	0.2181	Benign	-6.806	Benign	0.191	Neutral	0.008	Benign	0.25	Tolerated	20.6	Deleterious
p.Glu69Pro	VUS	-53.1508	Deleterious	0.6727	Pathogenic	-10.697	Pathogenic	0.396	Neutral	0.056	Benign	0.13	Tolerated
p.Glu69Leu	VUS	-33.2189	Indeterminate	0.5672	Pathogenic	-8.777	Pathogenic	0.352	Neutral	0.013	Benign	0.1	Tolerated
p.Glu69Asp	VUS	-5.22072	Neutral	0.0782	Benign	0.946	Benign	0.093	Neutral	0	Benign	0.65	Tolerated	5.42	Neutral
p.Glu69Ala	VUS	-0.172772	Neutral	0.2904	Benign	-6.886	Benign	0.271	Neutral	0.013	Benign	0.28	Tolerated	23.6	Deleterious
p.Glu69Gly	VUS	-13.0341	Indeterminate	0.5256	Ambiguous	-8.229	Pathogenic	0.261	Neutral	0.361	Benign	0.27	Tolerated	24	Deleterious
p.Glu69Val	VUS	-25.3859	Indeterminate	0.4395	Ambiguous	-9.187	Pathogenic	0.32	Neutral	0.007	Benign	0.09	Tolerated	24.1	Deleterious
p.Glu69Tyr	VUS	-8.93155	Indeterminate	0.7874	Pathogenic	-8.992	Pathogenic	0.36	Neutral	0.357	Benign	0.04	Deleterious
p.Glu69Cys	VUS	-5.93541	Indeterminate	0.8994	Pathogenic	-7.547	Pathogenic	0.39	Neutral	0.995	Probably damaging	0.03	Deleterious
p.Glu69Trp	VUS	-19.3841	Indeterminate	0.9321	Pathogenic	-10.108	Pathogenic	0.4	Neutral	0.864	Possibly damaging	0.01	Deleterious
p.Glu69Phe	VUS	-11.3008	Indeterminate	0.8778	Pathogenic	-8.34	Pathogenic	0.38	Neutral	0.387	Benign	0.03	Deleterious
p.Pro70Asn	VUS	-3.0971	Neutral	0.9617	Pathogenic	-19.189	Pathogenic	0.662	Disease	1	Probably damaging	0.44	Tolerated
p.Pro70Lys	VUS	-33.215	Indeterminate	0.8971	Pathogenic	-17.548	Pathogenic	0.705	Disease	1	Probably damaging	0.25	Tolerated
p.Pro70Thr	VUS	-4.42215	Neutral	0.4658	Ambiguous	-10.148	Pathogenic	0.606	Disease	1	Probably damaging	0.97	Tolerated	24.3	Deleterious
p.Pro70Arg	VUS	-0.464977	Neutral	0.76	Pathogenic	-14.695	Pathogenic	0.707	Disease	1	Probably damaging	0.16	Tolerated	27.3	Deleterious
p.Pro70Ser	VUS	-32.6282	Indeterminate	0.6826	Pathogenic	-12.102	Pathogenic	0.308	Neutral	1	Probably damaging	1	Tolerated	24.5	Deleterious
p.Pro70Ile	VUS	-0.383066	Neutral	0.628	Pathogenic	-9.419	Pathogenic	0.671	Disease	1	Probably damaging	0.18	Tolerated
p.Pro70Met	VUS	-1.72555e-06	Neutral	0.8289	Pathogenic	-11.402	Pathogenic	0.669	Disease	1	Probably damaging	0.08	Tolerated
p.Pro70His	VUS	-0.00173841	Neutral	0.9162	Pathogenic	-15.451	Pathogenic	0.663	Disease	1	Probably damaging	0.09	Tolerated	27.9	Deleterious
p.Pro70Gln	VUS	-4.4267e-05	Neutral	0.805	Pathogenic	-14.982	Pathogenic	0.628	Disease	1	Probably damaging	0.17	Tolerated
p.Pro70Leu	VUS	-3.38588	Neutral	0.6032	Pathogenic	-9.001	Pathogenic	0.675	Disease	1	Probably damaging	0.19	Tolerated	28.8	Deleterious
p.Pro70Asp	VUS	-53.1508	Deleterious	0.9737	Pathogenic	-19.201	Pathogenic	0.699	Disease	1	Probably damaging	0.29	Tolerated
p.Pro70Glu	VUS	-53.1508	Deleterious	0.8773	Pathogenic	-17.436	Pathogenic	0.653	Disease	0.999	Probably damaging	0.22	Tolerated
p.Pro70Ala	VUS	-2.00824	Neutral	0.2232	Benign	-7.482	Benign	0.333	Neutral	1	Probably damaging	0.82	Tolerated	23.8	Deleterious
p.Pro70Gly	VUS	-2.54089	Neutral	0.7794	Pathogenic	-11.938	Pathogenic	0.614	Disease	1	Probably damaging	0.44	Tolerated
p.Pro70Val	VUS	-0.0180402	Neutral	0.363	Ambiguous	-5.393	Benign	0.643	Disease	1	Probably damaging	0.57	Tolerated
p.Pro70Tyr	VUS	-1.89576	Neutral	0.9689	Pathogenic	-17.9	Pathogenic	0.664	Disease	1	Probably damaging	0.09	Tolerated
p.Pro70Cys	VUS	-1.46367e-08	Neutral	0.8804	Pathogenic	-13.039	Pathogenic	0.656	Disease	1	Probably damaging	0.11	Tolerated
p.Pro70Trp	VUS	-53.1508	Deleterious	0.9728	Pathogenic	-16.091	Pathogenic	0.641	Disease	1	Probably damaging	0.03	Deleterious
p.Pro70Phe	VUS	-0.10798	Neutral	0.9674	Pathogenic	-15.593	Pathogenic	0.684	Disease	1	Probably damaging	0.08	Tolerated
p.Asn71Lys	VUS	-53.1508	Deleterious	0.9616	Pathogenic	-13.498	Pathogenic	0.76	Disease	0.997	Probably damaging	0.02	Deleterious	24.4	Deleterious
p.Asn71Thr	VUS	-53.1508	Deleterious	0.5918	Pathogenic	-7.814	Pathogenic	0.691	Disease	0.978	Probably damaging	0.02	Deleterious	26.7	Deleterious
p.Asn71Arg	VUS	-53.1508	Deleterious	0.9005	Pathogenic	-9.377	Pathogenic	0.685	Disease	0.999	Probably damaging	0.12	Tolerated
p.Asn71Ser	Likely pathogenic	-53.1508	Deleterious	0.2129	Benign	-6.582	Benign	0.668	Disease	0.998	Probably damaging	0.04	Deleterious	25.3	Deleterious
p.Asn71Ile	VUS	-53.1508	Deleterious	0.9352	Pathogenic	-11.047	Pathogenic	0.825	Disease	0.998	Probably damaging	0	Deleterious	28.1	Deleterious
p.Asn71Met	VUS	-53.1508	Deleterious	0.9288	Pathogenic	-9.36	Pathogenic	0.767	Disease	1	Probably damaging	0	Deleterious
p.Asn71His	VUS	-20.6439	Indeterminate	0.5902	Pathogenic	-8.692	Pathogenic	0.748	Disease	0.998	Probably damaging	0.02	Deleterious	25.9	Deleterious
p.Asn71Gln	VUS	-13.4734	Indeterminate	0.8669	Pathogenic	-9.793	Pathogenic	0.671	Disease	0.998	Probably damaging	0.02	Deleterious
p.Asn71Pro	VUS	-53.1508	Deleterious	0.9656	Pathogenic	-11.366	Pathogenic	0.731	Disease	0.999	Probably damaging	0.01	Deleterious
p.Asn71Leu	VUS	-53.1508	Deleterious	0.8076	Pathogenic	-9.535	Pathogenic	0.744	Disease	0.998	Probably damaging	0	Deleterious
p.Asn71Asp	VUS	-26.2589	Indeterminate	0.223	Benign	-2.529	Benign	0.427	Neutral	0.998	Probably damaging	0.16	Tolerated	24	Deleterious
p.Asn71Glu	VUS	-12.424	Indeterminate	0.7821	Pathogenic	-6.869	Benign	0.631	Disease	0.992	Probably damaging	0.02	Deleterious
p.Asn71Ala	VUS	-20.515	Indeterminate	0.7043	Pathogenic	-6.891	Benign	0.71	Disease	0.986	Probably damaging	0.02	Deleterious
p.Asn71Gly	VUS	-1.92924	Neutral	0.5961	Pathogenic	-7.239	Benign	0.668	Disease	1	Probably damaging	0.05	Deleterious
p.Asn71Val	VUS	-53.1508	Deleterious	0.8789	Pathogenic	-9.191	Pathogenic	0.749	Disease	0.981	Probably damaging	0	Deleterious
p.Asn71Tyr	VUS	-53.1508	Deleterious	0.7956	Pathogenic	-12.453	Pathogenic	0.822	Disease	0.999	Probably damaging	0.01	Deleterious	26.8	Deleterious
p.Asn71Cys	VUS	-16.5022	Indeterminate	0.8283	Pathogenic	-5.763	Benign	0.73	Disease	1	Probably damaging	0	Deleterious
p.Asn71Trp	VUS	-53.1508	Deleterious	0.9803	Pathogenic	-11.426	Pathogenic	0.769	Disease	1	Probably damaging	0	Deleterious
p.Asn71Phe	VUS	-53.1508	Deleterious	0.9648	Pathogenic	-11.103	Pathogenic	0.761	Disease	1	Probably damaging	0	Deleterious
p.Cys72Asn	VUS	-5.59925	Neutral	0.4565	Ambiguous	-7.489	Benign	0.431	Neutral	0.789	Possibly damaging	0.27	Tolerated
p.Cys72Lys	VUS	-6.70991	Indeterminate	0.7865	Pathogenic	-9.855	Pathogenic	0.426	Neutral	0.666	Possibly damaging	0.51	Tolerated
p.Cys72Thr	VUS	-3.39641	Neutral	0.256	Benign	-3.637	Benign	0.249	Neutral	0.516	Possibly damaging	0.56	Tolerated
p.Cys72Arg	VUS	-0.610658	Neutral	0.3115	Benign	-6.411	Benign	0.106	Neutral	0.009	Benign	0.3	Tolerated	14.36	Neutral
p.Cys72Ser	VUS	-8.34087	Indeterminate	0.2006	Benign	-3.02	Benign	0.352	Neutral	0.981	Probably damaging	0.41	Tolerated	16.24	Deleterious
p.Cys72Ile	VUS	-7.24411	Indeterminate	0.3465	Ambiguous	-6.646	Benign	0.421	Neutral	0.966	Probably damaging	0.49	Tolerated
p.Cys72Met	VUS	-3.23955	Neutral	0.5647	Pathogenic	-6.741	Benign	0.428	Neutral	0.989	Probably damaging	0.16	Tolerated
p.Cys72His	VUS	-10.1279	Indeterminate	0.3639	Ambiguous	-5.639	Benign	0.42	Neutral	0.976	Probably damaging	0.17	Tolerated
p.Cys72Gln	VUS	-12.5777	Indeterminate	0.4744	Ambiguous	-5.573	Benign	0.407	Neutral	0.84	Possibly damaging	0.38	Tolerated
p.Cys72Pro	VUS	-7.7087	Indeterminate	0.7099	Pathogenic	-5.4	Benign	0.429	Neutral	0.915	Possibly damaging	0.22	Tolerated
p.Cys72Leu	VUS	-19.9707	Indeterminate	0.2665	Benign	-4.256	Benign	0.262	Neutral	0.8	Possibly damaging	0.55	Tolerated
p.Cys72Asp	VUS	-1.90733	Neutral	0.4226	Ambiguous	-4.463	Benign	0.457	Neutral	0.779	Possibly damaging	0.29	Tolerated
p.Cys72Glu	VUS	-3.07735	Neutral	0.5005	Ambiguous	-3.909	Benign	0.431	Neutral	0.84	Possibly damaging	0.48	Tolerated
p.Cys72Ala	VUS	-4.8068	Neutral	0.1581	Benign	-0.642	Benign	0.267	Neutral	0.965	Probably damaging	0.79	Tolerated
p.Cys72Gly	VUS	-2.96929	Neutral	0.134	Benign	-3.042	Benign	0.365	Neutral	0.987	Probably damaging	0.21	Tolerated	15.02	Deleterious
p.Cys72Val	VUS	-5.22731	Neutral	0.2264	Benign	-3.233	Benign	0.213	Neutral	0.752	Possibly damaging	1	Tolerated
p.Cys72Tyr	VUS	-0.681576	Neutral	0.3384	Benign	-7.294	Benign	0.189	Neutral	0.985	Probably damaging	0.23	Tolerated	18.34	Deleterious
p.Cys72Trp	VUS	-11.0219	Indeterminate	0.4589	Ambiguous	-8.483	Pathogenic	0.403	Neutral	0.998	Probably damaging	0.05	Deleterious	24	Deleterious
p.Cys72Phe	VUS	-8.51237	Indeterminate	0.1717	Benign	-6.378	Benign	0.373	Neutral	0.985	Probably damaging	0.2	Tolerated	19.45	Deleterious
p.Ala73Asn	VUS	-7.83095	Indeterminate	0.4928	Ambiguous	-12.711	Pathogenic	0.381	Neutral	0.499	Possibly damaging	0.3	Tolerated
p.Ala73Lys	VUS	-2.90265	Neutral	0.6144	Pathogenic	-15.546	Pathogenic	0.244	Neutral	0.819	Possibly damaging	0.65	Tolerated
p.Ala73Thr	VUS	-0.561778	Neutral	0.132	Benign	-6.872	Benign	0.166	Neutral	0.871	Possibly damaging	0.35	Tolerated	23.2	Deleterious
p.Ala73Arg	VUS	-4.0353	Neutral	0.3606	Ambiguous	-9.937	Pathogenic	0.24	Neutral	0.969	Probably damaging	0.31	Tolerated
p.Ala73Ser	VUS	-3.47763	Neutral	0.1403	Benign	-5.741	Benign	0.297	Neutral	0.255	Benign	0.44	Tolerated	22.9	Deleterious
p.Ala73Ile	VUS	-1.38305	Neutral	0.3864	Ambiguous	-10.332	Pathogenic	0.388	Neutral	0.985	Probably damaging	0.11	Tolerated
p.Ala73Met	VUS	-2.95748	Neutral	0.4562	Ambiguous	-10.245	Pathogenic	0.403	Neutral	0.999	Probably damaging	0.07	Tolerated
p.Ala73His	VUS	-0.197028	Neutral	0.4991	Ambiguous	-10.25	Pathogenic	0.389	Neutral	0.996	Probably damaging	0.09	Tolerated
p.Ala73Gln	VUS	-5.57121	Neutral	0.3172	Benign	-9.385	Pathogenic	0.208	Neutral	0.941	Possibly damaging	0.45	Tolerated
p.Ala73Pro	VUS	-2.47156	Neutral	0.1182	Benign	-4.704	Benign	0.155	Neutral	0.971	Probably damaging	0.23	Tolerated	20.9	Deleterious
p.Ala73Leu	VUS	-1.54454	Neutral	0.2858	Benign	-7.241	Benign	0.378	Neutral	0.9	Possibly damaging	0.18	Tolerated
p.Ala73Asp	VUS	-5.38652	Neutral	0.3899	Ambiguous	-12.169	Pathogenic	0.404	Neutral	0.477	Possibly damaging	0.58	Tolerated	21.9	Deleterious
p.Ala73Glu	VUS	-1.95015	Neutral	0.2439	Benign	-10.585	Pathogenic	0.155	Neutral	0.01	Benign	1	Tolerated
p.Ala73Gly	VUS	-2.98878	Neutral	0.1805	Benign	-6.596	Benign	0.185	Neutral	0.717	Possibly damaging	0.24	Tolerated	21	Deleterious
p.Ala73Val	VUS	-2.21029	Neutral	0.1819	Benign	-6.668	Benign	0.2	Neutral	0.838	Possibly damaging	0.17	Tolerated	17.4	Deleterious
p.Ala73Tyr	VUS	-4.05807	Neutral	0.6755	Pathogenic	-12.537	Pathogenic	0.419	Neutral	0.995	Probably damaging	0.03	Deleterious
p.Ala73Cys	VUS	-2.99268	Neutral	0.4259	Ambiguous	-8.85	Pathogenic	0.356	Neutral	0.995	Probably damaging	0.03	Deleterious
p.Ala73Trp	VUS	-7.09038	Indeterminate	0.7274	Pathogenic	-11.985	Pathogenic	0.483	Neutral	0.999	Probably damaging	0.01	Deleterious
p.Ala73Phe	VUS	-3.00421	Neutral	0.5232	Ambiguous	-10.971	Pathogenic	0.392	Neutral	0.995	Probably damaging	0.03	Deleterious
p.Asp74Asn	VUS	-53.1508	Deleterious	0.8381	Pathogenic	-9.623	Pathogenic	0.801	Disease	0.998	Probably damaging	0.17	Tolerated	31	Deleterious
p.Asp74Lys	VUS	-53.1508	Deleterious	0.9891	Pathogenic	-14.483	Pathogenic	0.799	Disease	1	Probably damaging	0.01	Deleterious
p.Asp74Thr	VUS	-53.1508	Deleterious	0.9723	Pathogenic	-10.826	Pathogenic	0.79	Disease	0.997	Probably damaging	0.01	Deleterious
p.Asp74Arg	VUS	-53.1508	Deleterious	0.9747	Pathogenic	-13.088	Pathogenic	0.801	Disease	1	Probably damaging	0.01	Deleterious
p.Asp74Ser	VUS	-12.5	Indeterminate	0.8258	Pathogenic	-11.424	Pathogenic	0.739	Disease	0.999	Probably damaging	0.02	Deleterious
p.Asp74Ile	VUS	-53.1508	Deleterious	0.9679	Pathogenic	-14.477	Pathogenic	0.802	Disease	1	Probably damaging	0	Deleterious
p.Asp74Met	VUS	-53.1508	Deleterious	0.9937	Pathogenic	-15.229	Pathogenic	0.812	Disease	1	Probably damaging	0	Deleterious
p.Asp74His	VUS	-5.47159	Neutral	0.8861	Pathogenic	-9.178	Pathogenic	0.901	Disease	1	Probably damaging	0.01	Deleterious	29.8	Deleterious
p.Asp74Gln	VUS	-53.1508	Deleterious	0.9741	Pathogenic	-12.133	Pathogenic	0.785	Disease	0.999	Probably damaging	0.01	Deleterious
p.Asp74Pro	VUS	-53.1508	Deleterious	0.9834	Pathogenic	-14.642	Pathogenic	0.753	Disease	0.982	Probably damaging	0.01	Deleterious
p.Asp74Leu	VUS	-53.1508	Deleterious	0.95	Pathogenic	-13.733	Pathogenic	0.786	Disease	1	Probably damaging	0	Deleterious
p.Asp74Glu	VUS	-1.98846e-08	Neutral	0.867	Pathogenic	-7.6	Pathogenic	0.781	Disease	0.886	Possibly damaging	0.01	Deleterious	24.05	Deleterious
p.Asp74Ala	VUS	-53.1508	Deleterious	0.8943	Pathogenic	-10.974	Pathogenic	0.854	Disease	1	Probably damaging	0.01	Deleterious	29.2	Deleterious
p.Asp74Gly	VUS	-53.1508	Deleterious	0.9501	Pathogenic	-10.998	Pathogenic	0.881	Disease	0.999	Probably damaging	0.03	Deleterious	29.2	Deleterious
p.Asp74Val	VUS	-53.1508	Deleterious	0.9289	Pathogenic	-12.814	Pathogenic	0.902	Disease	0.997	Probably damaging	0	Deleterious	29	Deleterious
p.Asp74Tyr	VUS	-53.1508	Deleterious	0.8956	Pathogenic	-13.082	Pathogenic	0.901	Disease	1	Probably damaging	0	Deleterious	30	Deleterious
p.Asp74Cys	VUS	-0.00678806	Neutral	0.929	Pathogenic	-11.524	Pathogenic	0.791	Disease	1	Probably damaging	0	Deleterious
p.Asp74Trp	VUS	-53.1508	Deleterious	0.9936	Pathogenic	-14.649	Pathogenic	0.81	Disease	1	Probably damaging	0	Deleterious
p.Asp74Phe	VUS	-53.1508	Deleterious	0.9831	Pathogenic	-15.304	Pathogenic	0.817	Disease	1	Probably damaging	0	Deleterious
p.Pro75Asn	VUS	-2.20983	Neutral	0.6079	Pathogenic	-11.437	Pathogenic	0.443	Neutral	0.999	Probably damaging	0.68	Tolerated
p.Pro75Lys	VUS	-4.73416	Neutral	0.5067	Ambiguous	-10.135	Pathogenic	0.306	Neutral	1	Probably damaging	0.83	Tolerated
p.Pro75Thr	VUS	-1.79981	Neutral	0.2037	Benign	-8.881	Pathogenic	0.403	Neutral	0.999	Probably damaging	0.53	Tolerated	25.2	Deleterious
p.Pro75Arg	VUS	-0.725878	Neutral	0.249	Benign	-7.821	Pathogenic	0.227	Neutral	1	Probably damaging	0.64	Tolerated	23.6	Deleterious
p.Pro75Ser	VUS	-1.66805	Neutral	0.2505	Benign	-7.869	Pathogenic	0.168	Neutral	1	Probably damaging	0.57	Tolerated	24	Deleterious
p.Pro75Ile	VUS	-2.22247	Neutral	0.5196	Ambiguous	-12.882	Pathogenic	0.524	Disease	1	Probably damaging	0.14	Tolerated
p.Pro75Met	VUS	-4.48345	Neutral	0.5736	Pathogenic	-12.248	Pathogenic	0.481	Neutral	1	Probably damaging	0.08	Tolerated
p.Pro75His	VUS	-0.31093	Neutral	0.3661	Ambiguous	-10.099	Pathogenic	0.426	Neutral	1	Probably damaging	0.13	Tolerated	26.3	Deleterious
p.Pro75Gln	VUS	-3.70403	Neutral	0.3196	Benign	-9.248	Pathogenic	0.401	Neutral	1	Probably damaging	0.48	Tolerated
p.Pro75Leu	VUS	-1.79301	Neutral	0.2612	Benign	-9.645	Pathogenic	0.302	Neutral	1	Probably damaging	0.24	Tolerated	27	Deleterious
p.Pro75Asp	VUS	-1.92822	Neutral	0.5776	Pathogenic	-10.893	Pathogenic	0.462	Neutral	0.999	Probably damaging	0.54	Tolerated
p.Pro75Glu	VUS	-1.03278	Neutral	0.3748	Ambiguous	-10.344	Pathogenic	0.43	Neutral	0.998	Probably damaging	1	Tolerated
p.Pro75Ala	VUS	-1.00124	Neutral	0.1356	Benign	-7.189	Benign	0.28	Neutral	0.999	Probably damaging	0.55	Tolerated	23.1	Deleterious
p.Pro75Gly	VUS	-1.32951	Neutral	0.4257	Ambiguous	-8.308	Pathogenic	0.299	Neutral	1	Probably damaging	0.33	Tolerated
p.Pro75Val	VUS	-1.3098	Neutral	0.3043	Benign	-10.138	Pathogenic	0.444	Neutral	1	Probably damaging	0.21	Tolerated
p.Pro75Tyr	VUS	-1.28392	Neutral	0.7005	Pathogenic	-13.031	Pathogenic	0.471	Neutral	1	Probably damaging	0.07	Tolerated
p.Pro75Cys	VUS	-1.57607	Neutral	0.7905	Pathogenic	-11.331	Pathogenic	0.489	Neutral	1	Probably damaging	0.05	Deleterious
p.Pro75Trp	VUS	-2.94947	Neutral	0.7735	Pathogenic	-12.091	Pathogenic	0.515	Disease	1	Probably damaging	0.02	Deleterious
p.Pro75Phe	VUS	-1.54405	Neutral	0.7006	Pathogenic	-13.156	Pathogenic	0.496	Neutral	1	Probably damaging	0.06	Tolerated
p.Ala76Asn	VUS	-13.4047	Indeterminate	0.31	Benign	-4.571	Benign	0.285	Neutral	0.002	Benign	0.3	Tolerated
p.Ala76Lys	VUS	-10.5445	Indeterminate	0.4685	Ambiguous	-3.806	Benign	0.289	Neutral	0.8	Possibly damaging	0.74	Tolerated
p.Ala76Thr	VUS	-2.82553	Neutral	0.1157	Benign	-4.13	Benign	0.165	Neutral	0.038	Benign	0.66	Tolerated	15.16	Deleterious
p.Ala76Arg	VUS	-12.3957	Indeterminate	0.3049	Benign	-2.131	Benign	0.244	Neutral	0.966	Probably damaging	0.31	Tolerated
p.Ala76Ser	VUS	-7.14007	Indeterminate	0.1173	Benign	-4.435	Benign	0.168	Neutral	0.03	Benign	0.51	Tolerated	14.18	Neutral
p.Ala76Ile	VUS	-20.1721	Indeterminate	0.3135	Benign	-5.744	Benign	0.303	Neutral	0.666	Possibly damaging	0.11	Tolerated
p.Ala76Met	VUS	-1.827	Neutral	0.3062	Benign	-7.015	Benign	0.304	Neutral	0.966	Probably damaging	0.06	Tolerated
p.Ala76His	VUS	-4.71193	Neutral	0.3524	Ambiguous	-5.189	Benign	0.244	Neutral	0.991	Probably damaging	0.07	Tolerated
p.Ala76Gln	VUS	-16.2211	Indeterminate	0.256	Benign	-5.006	Benign	0.277	Neutral	0.966	Probably damaging	0.35	Tolerated
p.Ala76Pro	VUS	-3.4067	Neutral	0.3909	Ambiguous	-7.152	Benign	0.281	Neutral	0.936	Possibly damaging	0.17	Tolerated	21	Deleterious
p.Ala76Leu	VUS	-9.04734	Indeterminate	0.1986	Benign	-5.093	Benign	0.305	Neutral	0.452	Benign	0.18	Tolerated
p.Ala76Asp	VUS	-4.79292	Neutral	0.2923	Benign	-6.19	Benign	0.27	Neutral	0.003	Benign	0.38	Tolerated	14.35	Neutral
p.Ala76Glu	VUS	-8.61312	Indeterminate	0.2402	Benign	-6.081	Benign	0.244	Neutral	0.428	Benign	0.82	Tolerated
p.Ala76Gly	VUS	-2.53031	Neutral	0.1588	Benign	-3.437	Benign	0.269	Neutral	0.316	Benign	0.35	Tolerated	13.15	Neutral
p.Ala76Val	VUS	-3.7775	Neutral	0.1339	Benign	-3.223	Benign	0.161	Neutral	0.001	Benign	0.17	Tolerated	13.15	Neutral
p.Ala76Tyr	VUS	-3.09132	Neutral	0.4651	Ambiguous	-7.666	Pathogenic	0.353	Neutral	0.966	Probably damaging	0.03	Deleterious
p.Ala76Cys	VUS	-14.4952	Indeterminate	0.4836	Ambiguous	-5.99	Benign	0.323	Neutral	0.989	Probably damaging	0.03	Deleterious
p.Ala76Trp	VUS	-1.23871	Neutral	0.6791	Pathogenic	-8.049	Pathogenic	0.372	Neutral	0.997	Probably damaging	0.01	Deleterious
p.Ala76Phe	VUS	-6.82382	Indeterminate	0.3737	Ambiguous	-8.797	Pathogenic	0.342	Neutral	0.933	Possibly damaging	0.03	Deleterious
p.Thr77Asn	VUS	-4.52043	Neutral	0.4401	Ambiguous	-3.958	Benign	0.527	Disease	0.999	Probably damaging	0.22	Tolerated	25.8	Deleterious
p.Thr77Lys	VUS	-4.4024	Neutral	0.6986	Pathogenic	-9.953	Pathogenic	0.597	Disease	0.998	Probably damaging	0.15	Tolerated
p.Thr77Arg	VUS	-12.2633	Indeterminate	0.5249	Ambiguous	-9.091	Pathogenic	0.573	Disease	0.999	Probably damaging	0.1	Tolerated
p.Thr77Ser	VUS	-6.48282	Indeterminate	0.2652	Benign	-5.226	Benign	0.28	Neutral	0.993	Probably damaging	1	Tolerated	23.4	Deleterious
p.Thr77Ile	VUS	-2.45868	Neutral	0.8141	Pathogenic	-9.666	Pathogenic	0.572	Disease	0.998	Probably damaging	0.09	Tolerated	26.8	Deleterious
p.Thr77Met	VUS	-6.22807	Indeterminate	0.3921	Ambiguous	-9.205	Pathogenic	0.569	Disease	1	Probably damaging	0.05	Deleterious
p.Thr77His	VUS	-4.94936	Neutral	0.5887	Pathogenic	-6.654	Benign	0.571	Disease	1	Probably damaging	0.05	Deleterious
p.Thr77Gln	VUS	-5.14317	Neutral	0.6083	Pathogenic	-8.482	Pathogenic	0.545	Disease	0.997	Probably damaging	0.11	Tolerated
p.Thr77Pro	VUS	-33.2185	Indeterminate	0.5	Ambiguous	-12.094	Pathogenic	0.349	Neutral	1	Probably damaging	0.19	Tolerated	26	Deleterious
p.Thr77Leu	VUS	-5.03008	Neutral	0.3219	Benign	-8.756	Pathogenic	0.557	Disease	0.994	Probably damaging	0.13	Tolerated
p.Thr77Asp	VUS	-7.24691	Indeterminate	0.7915	Pathogenic	-5.715	Benign	0.569	Disease	0.999	Probably damaging	0.15	Tolerated
p.Thr77Glu	VUS	-16.5574	Indeterminate	0.7672	Pathogenic	-7.606	Pathogenic	0.562	Disease	0.998	Probably damaging	0.12	Tolerated
p.Thr77Ala	VUS	-6.60546	Indeterminate	0.276	Benign	-6.632	Benign	0.506	Disease	0.982	Probably damaging	0.56	Tolerated	23.3	Deleterious
p.Thr77Gly	VUS	-1.41062	Neutral	0.3456	Ambiguous	-7.905	Pathogenic	0.551	Disease	1	Probably damaging	0.3	Tolerated
p.Thr77Val	VUS	-8.27466	Indeterminate	0.5823	Pathogenic	-9.17	Pathogenic	0.484	Neutral	0.992	Probably damaging	0.16	Tolerated
p.Thr77Tyr	VUS	-2.85658	Neutral	0.7131	Pathogenic	-9.024	Pathogenic	0.592	Disease	0.999	Probably damaging	0.06	Tolerated
p.Thr77Cys	VUS	-2.08431	Neutral	0.7422	Pathogenic	-7.943	Pathogenic	0.582	Disease	1	Probably damaging	0.08	Tolerated
p.Thr77Trp	VUS	-3.70231	Neutral	0.8587	Pathogenic	-11.811	Pathogenic	0.59	Disease	1	Probably damaging	0.02	Deleterious
p.Thr77Phe	VUS	-3.56047	Neutral	0.7102	Pathogenic	-10.34	Pathogenic	0.581	Disease	0.999	Probably damaging	0.05	Deleterious
p.Leu78Asn	VUS	-0.00446599	Neutral	0.3776	Ambiguous	-8.32	Pathogenic	0.474	Neutral	1	Probably damaging	0.09	Tolerated
p.Leu78Lys	VUS	-0.101431	Neutral	0.2747	Benign	-7.819	Pathogenic	0.472	Neutral	0.99	Probably damaging	0.1	Tolerated
p.Leu78Thr	VUS	-0.223474	Neutral	0.3528	Ambiguous	-8.986	Pathogenic	0.448	Neutral	1	Probably damaging	0.14	Tolerated
p.Leu78Arg	VUS	-16.9466	Indeterminate	0.1211	Benign	-4.663	Benign	0.497	Neutral	0.999	Probably damaging	0.11	Tolerated	27	Deleterious
p.Leu78Ser	VUS	-0.00146288	Neutral	0.3317	Benign	-5.841	Benign	0.422	Neutral	1	Probably damaging	0.13	Tolerated
p.Leu78Ile	VUS	-0.322998	Neutral	0.3375	Benign	-13.34	Pathogenic	0.341	Neutral	0.997	Probably damaging	0.38	Tolerated	18.47	Deleterious
p.Leu78Met	VUS	-11.966	Indeterminate	0.1891	Benign	-7.19	Benign	0.363	Neutral	1	Probably damaging	0.23	Tolerated
p.Leu78His	VUS	-1.17059	Neutral	0.2993	Benign	-6.423	Benign	0.443	Neutral	1	Probably damaging	0.15	Tolerated	27	Deleterious
p.Leu78Gln	VUS	-5.65565	Neutral	0.1461	Benign	-6.008	Benign	0.448	Neutral	1	Probably damaging	0.1	Tolerated
p.Leu78Pro	VUS	-10.9726	Indeterminate	0.4528	Ambiguous	-11.561	Pathogenic	0.521	Disease	1	Probably damaging	0.08	Tolerated	27.5	Deleterious
p.Leu78Asp	VUS	-4.16297e-10	Neutral	0.606	Pathogenic	-9.005	Pathogenic	0.485	Neutral	1	Probably damaging	0.06	Tolerated
p.Leu78Glu	VUS	-5.40621	Neutral	0.3396	Benign	-8.874	Pathogenic	0.476	Neutral	1	Probably damaging	0.09	Tolerated
p.Leu78Ala	VUS	-14.3217	Indeterminate	0.2132	Benign	-5.392	Benign	0.404	Neutral	1	Probably damaging	0.21	Tolerated
p.Leu78Gly	VUS	0	Neutral	0.1888	Benign	-1.073	Benign	0.209	Neutral	1	Probably damaging	0.11	Tolerated
p.Leu78Val	VUS	-0.0780439	Neutral	0.1929	Benign	-9.48	Pathogenic	0.336	Neutral	0.994	Probably damaging	0.3	Tolerated	18.18	Deleterious
p.Leu78Tyr	VUS	-3.31055	Neutral	0.3986	Ambiguous	-10.109	Pathogenic	0.4	Neutral	0.994	Probably damaging	0.52	Tolerated
p.Leu78Cys	VUS	-2.33172	Neutral	0.5088	Ambiguous	-5.348	Benign	0.41	Neutral	1	Probably damaging	0.07	Tolerated
p.Leu78Trp	VUS	-0.174886	Neutral	0.3248	Benign	-10.056	Pathogenic	0.416	Neutral	1	Probably damaging	0.13	Tolerated
p.Leu78Phe	VUS	-0.0337845	Neutral	0.2207	Benign	-9.28	Pathogenic	0.228	Neutral	0.999	Probably damaging	0.61	Tolerated	19.6	Deleterious
p.Thr79Asn	VUS	-0.322777	Neutral	0.5472	Ambiguous	-10.597	Pathogenic	0.384	Neutral	0.93	Possibly damaging	0.04	Deleterious	25.3	Deleterious
p.Thr79Lys	VUS	-2.10046	Neutral	0.773	Pathogenic	-13.858	Pathogenic	0.393	Neutral	0.852	Possibly damaging	0.02	Deleterious
p.Thr79Arg	VUS	-12.6403	Indeterminate	0.5924	Pathogenic	-10.005	Pathogenic	0.405	Neutral	0.982	Probably damaging	0.02	Deleterious
p.Thr79Ser	VUS	-0.659761	Neutral	0.2456	Benign	-3.941	Benign	0.115	Neutral	0.055	Benign	0.38	Tolerated	20.74	Deleterious
p.Thr79Ile	VUS	-0.336062	Neutral	0.8117	Pathogenic	-6.627	Benign	0.168	Neutral	0.938	Possibly damaging	0.02	Deleterious	26.4	Deleterious
p.Thr79Met	VUS	-1.2368	Neutral	0.5079	Ambiguous	-7.079	Benign	0.355	Neutral	0.998	Probably damaging	0.01	Deleterious
p.Thr79His	VUS	-1.60553	Neutral	0.6363	Pathogenic	-11.015	Pathogenic	0.403	Neutral	0.998	Probably damaging	0.01	Deleterious
p.Thr79Gln	VUS	-0.842168	Neutral	0.5363	Ambiguous	-8.943	Pathogenic	0.388	Neutral	0.95	Possibly damaging	0.02	Deleterious
p.Thr79Pro	VUS	-53.1508	Deleterious	0.6573	Pathogenic	-11.218	Pathogenic	0.344	Neutral	0.998	Probably damaging	0.03	Deleterious	24.8	Deleterious
p.Thr79Leu	VUS	-4.79544	Neutral	0.48	Ambiguous	-5.734	Benign	0.396	Neutral	0.852	Possibly damaging	0.02	Deleterious
p.Thr79Asp	VUS	-3.25003	Neutral	0.8238	Pathogenic	-11.557	Pathogenic	0.405	Neutral	0.946	Possibly damaging	0.02	Deleterious
p.Thr79Glu	VUS	-1.73887	Neutral	0.7004	Pathogenic	-10.323	Pathogenic	0.408	Neutral	0.805	Possibly damaging	0.02	Deleterious
p.Thr79Ala	VUS	-1.9485	Neutral	0.3031	Benign	-4.346	Benign	0.089	Neutral	0.006	Benign	0.16	Tolerated	19.41	Deleterious
p.Thr79Gly	VUS	-2.54362	Neutral	0.4236	Ambiguous	-8.449	Pathogenic	0.384	Neutral	0.997	Probably damaging	0.03	Deleterious
p.Thr79Val	VUS	-1.04831	Neutral	0.5979	Pathogenic	-3.113	Benign	0.277	Neutral	0.673	Possibly damaging	0.03	Deleterious
p.Thr79Tyr	VUS	-4.53867	Neutral	0.8001	Pathogenic	-9.482	Pathogenic	0.419	Neutral	0.997	Probably damaging	0.01	Deleterious
p.Thr79Cys	VUS	-3.23727	Neutral	0.7324	Pathogenic	-6.026	Benign	0.228	Neutral	1	Probably damaging	0.01	Deleterious
p.Thr79Trp	VUS	-5.35526	Neutral	0.8715	Pathogenic	-7.97	Pathogenic	0.424	Neutral	0.999	Probably damaging	0	Deleterious
p.Thr79Phe	VUS	-1.91309	Neutral	0.8125	Pathogenic	-8.811	Pathogenic	0.229	Neutral	0.991	Probably damaging	0.09	Tolerated
p.Arg80Asn	VUS	-17.84	Indeterminate	0.8009	Pathogenic	-13.18	Pathogenic	0.456	Neutral	1	Probably damaging	0.47	Tolerated
p.Arg80Lys	VUS	-4.54981	Neutral	0.4406	Ambiguous	-11.678	Pathogenic	0.319	Neutral	0.985	Probably damaging	0.9	Tolerated
p.Arg80Thr	VUS	-10.8589	Indeterminate	0.4117	Ambiguous	-4.447	Benign	0.162	Neutral	0.998	Probably damaging	0.82	Tolerated
p.Arg80Ser	VUS	-3.31469	Neutral	0.6392	Pathogenic	-6.99	Benign	0.126	Neutral	1	Probably damaging	0.93	Tolerated
p.Arg80Ile	VUS	-53.1508	Deleterious	0.5159	Ambiguous	-12.709	Pathogenic	0.475	Neutral	0.998	Probably damaging	0.24	Tolerated
p.Arg80Met	VUS	-12.6136	Indeterminate	0.5624	Ambiguous	-9.13	Pathogenic	0.471	Neutral	0.992	Probably damaging	0.13	Tolerated
p.Arg80His	VUS	-7.90898	Indeterminate	0.2263	Benign	-7.352	Benign	0.145	Neutral	0.999	Probably damaging	0.18	Tolerated
p.Arg80Gln	VUS	-17.5028	Indeterminate	0.2243	Benign	-7.279	Benign	0.136	Neutral	1	Probably damaging	0.54	Tolerated	22.7	Deleterious
p.Arg80Pro	VUS	-53.1508	Deleterious	0.8603	Pathogenic	-9.743	Pathogenic	0.229	Neutral	1	Probably damaging	0.31	Tolerated	24.5	Deleterious
p.Arg80Leu	VUS	-10.6052	Indeterminate	0.2514	Benign	-7.891	Pathogenic	0.138	Neutral	0.869	Possibly damaging	0.4	Tolerated	22.3	Deleterious
p.Arg80Asp	VUS	-15.1108	Indeterminate	0.9354	Pathogenic	-15.84	Pathogenic	0.499	Neutral	1	Probably damaging	0.51	Tolerated
p.Arg80Glu	VUS	-4.74122	Neutral	0.6812	Pathogenic	-13.852	Pathogenic	0.471	Neutral	0.998	Probably damaging	0.81	Tolerated
p.Arg80Ala	VUS	-6.71774	Indeterminate	0.5359	Ambiguous	-7.559	Pathogenic	0.266	Neutral	0.995	Probably damaging	1	Tolerated
p.Arg80Gly	VUS	-7.39469	Indeterminate	0.5276	Ambiguous	-9.898	Pathogenic	0.418	Neutral	1	Probably damaging	0.43	Tolerated	24.5	Deleterious
p.Arg80Val	VUS	-20.0512	Indeterminate	0.4465	Ambiguous	-10.292	Pathogenic	0.49	Neutral	0.998	Probably damaging	0.38	Tolerated
p.Arg80Tyr	VUS	-9.68994	Indeterminate	0.4691	Ambiguous	-6.988	Benign	0.419	Neutral	0.993	Probably damaging	0.16	Tolerated
p.Arg80Cys	VUS	-1.99502	Neutral	0.2644	Benign	-7.999	Pathogenic	0.478	Neutral	1	Probably damaging	0.09	Tolerated
p.Arg80Trp	VUS	-9.72227	Indeterminate	0.2873	Benign	-9.485	Pathogenic	0.457	Neutral	0.999	Probably damaging	0.04	Deleterious
p.Arg80Phe	VUS	-14.9773	Indeterminate	0.6496	Pathogenic	-7.787	Pathogenic	0.339	Neutral	0.956	Possibly damaging	0.14	Tolerated
p.Pro81Asn	VUS	-53.1508	Deleterious	0.9894	Pathogenic	-18.84	Pathogenic	0.819	Disease	1	Probably damaging	0.02	Deleterious
p.Pro81Lys	VUS	-53.1508	Deleterious	0.9967	Pathogenic	-21.446	Pathogenic	0.852	Disease	1	Probably damaging	0.03	Deleterious
p.Pro81Thr	VUS	-33.2193	Indeterminate	0.8388	Pathogenic	-13.288	Pathogenic	0.846	Disease	1	Probably damaging	0.07	Tolerated	27.8	Deleterious
p.Pro81Arg	VUS	-53.1508	Deleterious	0.9753	Pathogenic	-17.076	Pathogenic	0.927	Disease	1	Probably damaging	0.02	Deleterious	29.1	Deleterious
p.Pro81Ser	VUS	-53.1508	Deleterious	0.8599	Pathogenic	-12.546	Pathogenic	0.815	Disease	1	Probably damaging	0.07	Tolerated	29	Deleterious
p.Pro81Ile	VUS	-53.1508	Deleterious	0.9406	Pathogenic	-18.389	Pathogenic	0.81	Disease	1	Probably damaging	0.07	Tolerated
p.Pro81Met	VUS	-53.1508	Deleterious	0.9665	Pathogenic	-15.358	Pathogenic	0.828	Disease	1	Probably damaging	0.02	Deleterious
p.Pro81His	VUS	-53.1508	Deleterious	0.9778	Pathogenic	-18.007	Pathogenic	0.871	Disease	1	Probably damaging	0.01	Deleterious	29.6	Deleterious
p.Pro81Gln	VUS	-53.1508	Deleterious	0.9612	Pathogenic	-16.672	Pathogenic	0.817	Disease	1	Probably damaging	0.02	Deleterious
p.Pro81Leu	VUS	-53.1508	Deleterious	0.8411	Pathogenic	-14.011	Pathogenic	0.895	Disease	1	Probably damaging	0.07	Tolerated	31	Deleterious
p.Pro81Asp	VUS	-53.1508	Deleterious	0.994	Pathogenic	-19.156	Pathogenic	0.85	Disease	1	Probably damaging	0.02	Deleterious
p.Pro81Glu	VUS	-53.1508	Deleterious	0.9834	Pathogenic	-17.894	Pathogenic	0.808	Disease	0.999	Probably damaging	0.03	Deleterious
p.Pro81Ala	VUS	-20.0762	Indeterminate	0.4524	Ambiguous	-10.676	Pathogenic	0.707	Disease	1	Probably damaging	0.17	Tolerated	27	Deleterious
p.Pro81Gly	VUS	-53.1508	Deleterious	0.9254	Pathogenic	-15.726	Pathogenic	0.773	Disease	1	Probably damaging	0.07	Tolerated
p.Pro81Val	VUS	-33.2186	Indeterminate	0.8183	Pathogenic	-15.018	Pathogenic	0.618	Disease	1	Probably damaging	0.31	Tolerated
p.Pro81Tyr	VUS	-53.1508	Deleterious	0.9942	Pathogenic	-20.198	Pathogenic	0.827	Disease	1	Probably damaging	0.01	Deleterious
p.Pro81Cys	VUS	-19.6635	Indeterminate	0.9474	Pathogenic	-14.434	Pathogenic	0.817	Disease	1	Probably damaging	0.02	Deleterious
p.Pro81Trp	VUS	-53.1508	Deleterious	0.996	Pathogenic	-20.708	Pathogenic	0.837	Disease	1	Probably damaging	0	Deleterious
p.Pro81Phe	VUS	-53.1508	Deleterious	0.994	Pathogenic	-18.683	Pathogenic	0.816	Disease	1	Probably damaging	0.02	Deleterious
p.Val82Asn	VUS	-53.1508	Deleterious	0.9718	Pathogenic	-16.388	Pathogenic	0.697	Disease	1	Probably damaging	0	Deleterious
p.Val82Lys	VUS	-53.1508	Deleterious	0.9855	Pathogenic	-18.366	Pathogenic	0.768	Disease	0.987	Probably damaging	0.01	Deleterious
p.Val82Thr	VUS	-8.2931	Indeterminate	0.7058	Pathogenic	-6.907	Benign	0.498	Neutral	0.998	Probably damaging	0.03	Deleterious
p.Val82Arg	VUS	-53.1508	Deleterious	0.9597	Pathogenic	-14.362	Pathogenic	0.742	Disease	0.997	Probably damaging	0	Deleterious
p.Val82Ser	VUS	-7.81921	Indeterminate	0.7613	Pathogenic	-8.134	Pathogenic	0.691	Disease	0.999	Probably damaging	0.01	Deleterious
p.Val82Ile	VUS	-7.72751	Indeterminate	0.1255	Benign	-7.877	Pathogenic	0.246	Neutral	0.768	Possibly damaging	0.6	Tolerated
p.Val82Met	VUS	-1.58767	Neutral	0.5783	Pathogenic	-8.195	Pathogenic	0.451	Neutral	1	Probably damaging	0.02	Deleterious	27.6	Deleterious
p.Val82His	VUS	-33.2166	Indeterminate	0.9819	Pathogenic	-15.183	Pathogenic	0.684	Disease	1	Probably damaging	0	Deleterious
p.Val82Gln	VUS	-13.1059	Indeterminate	0.9388	Pathogenic	-12.302	Pathogenic	0.713	Disease	0.997	Probably damaging	0	Deleterious
p.Val82Pro	VUS	-30.464	Indeterminate	0.8379	Pathogenic	-11.82	Pathogenic	0.68	Disease	0.999	Probably damaging	0.01	Deleterious
p.Val82Leu	VUS	-5.30169	Neutral	0.422	Ambiguous	-6.551	Benign	0.219	Neutral	0.758	Possibly damaging	0.53	Tolerated	22.7	Deleterious
p.Val82Asp	VUS	-53.1508	Deleterious	0.9883	Pathogenic	-16.635	Pathogenic	0.789	Disease	1	Probably damaging	0	Deleterious
p.Val82Glu	VUS	-33.2051	Indeterminate	0.9406	Pathogenic	-13.403	Pathogenic	0.8	Disease	1	Probably damaging	0.01	Deleterious	27.7	Deleterious
p.Val82Ala	VUS	-2.05005	Neutral	0.3786	Ambiguous	-1.311	Benign	0.315	Neutral	0.868	Possibly damaging	0.1	Tolerated	22.8	Deleterious
p.Val82Gly	VUS	-33.2191	Indeterminate	0.6991	Pathogenic	-9.378	Pathogenic	0.553	Disease	0.999	Probably damaging	0	Deleterious	26.8	Deleterious
p.Val82Tyr	VUS	-53.1508	Deleterious	0.9744	Pathogenic	-15.755	Pathogenic	0.668	Disease	0.999	Probably damaging	0.01	Deleterious
p.Val82Cys	VUS	-13.8993	Indeterminate	0.8291	Pathogenic	-10.097	Pathogenic	0.644	Disease	1	Probably damaging	0.01	Deleterious
p.Val82Trp	VUS	-53.1508	Deleterious	0.9889	Pathogenic	-14.308	Pathogenic	0.636	Disease	1	Probably damaging	0	Deleterious
p.Val82Phe	VUS	-21.2916	Indeterminate	0.7499	Pathogenic	-13.042	Pathogenic	0.638	Disease	0.999	Probably damaging	0.02	Deleterious
p.His83Asn	VUS	-53.1508	Deleterious	0.7844	Pathogenic	-16.366	Pathogenic	0.911	Disease	0.999	Probably damaging	0	Deleterious	29.4	Deleterious
p.His83Lys	VUS	-53.1508	Deleterious	0.9871	Pathogenic	-18.725	Pathogenic	0.844	Disease	0.971	Probably damaging	0	Deleterious
p.His83Thr	VUS	-53.1508	Deleterious	0.96	Pathogenic	-15.151	Pathogenic	0.837	Disease	0.999	Probably damaging	0	Deleterious
p.His83Arg	Pathogenic	-53.1508	Deleterious	0.9431	Pathogenic	-14.578	Pathogenic	0.895	Disease	0.962	Probably damaging	0	Deleterious	27.1	Deleterious
p.His83Ser	VUS	-53.1508	Deleterious	0.9106	Pathogenic	-15.71	Pathogenic	0.832	Disease	1	Probably damaging	0	Deleterious
p.His83Ile	VUS	-53.1508	Deleterious	0.9602	Pathogenic	-14.147	Pathogenic	0.871	Disease	0.992	Probably damaging	0	Deleterious
p.His83Met	VUS	-30.4897	Indeterminate	0.9481	Pathogenic	-12.73	Pathogenic	0.868	Disease	0.998	Probably damaging	0	Deleterious
p.His83Gln	VUS	-53.1508	Deleterious	0.8794	Pathogenic	-10.993	Pathogenic	0.877	Disease	1	Probably damaging	0	Deleterious	25.7	Deleterious
p.His83Pro	VUS	-53.1508	Deleterious	0.8982	Pathogenic	-12.252	Pathogenic	0.901	Disease	1	Probably damaging	0	Deleterious	28.5	Deleterious
p.His83Leu	VUS	-53.1508	Deleterious	0.8031	Pathogenic	-12.52	Pathogenic	0.896	Disease	0.989	Probably damaging	0	Deleterious	29.4	Deleterious
p.His83Asp	Likely pathogenic	-53.1508	Deleterious	0.8932	Pathogenic	-14.146	Pathogenic	0.904	Disease	0.999	Probably damaging	0	Deleterious	29.8	Deleterious
p.His83Glu	VUS	-53.1508	Deleterious	0.937	Pathogenic	-13.4	Pathogenic	0.84	Disease	1	Probably damaging	0	Deleterious
p.His83Ala	VUS	-33.2172	Indeterminate	0.9429	Pathogenic	-12.387	Pathogenic	0.822	Disease	1	Probably damaging	0	Deleterious
p.His83Gly	VUS	-53.1508	Deleterious	0.9562	Pathogenic	-14.624	Pathogenic	0.825	Disease	1	Probably damaging	0	Deleterious
p.His83Val	VUS	-53.1508	Deleterious	0.9547	Pathogenic	-13.93	Pathogenic	0.872	Disease	1	Probably damaging	0	Deleterious
p.His83Tyr	Likely pathogenic	-53.1508	Deleterious	0.7859	Pathogenic	-14.356	Pathogenic	0.898	Disease	0.973	Probably damaging	0	Deleterious	29.4	Deleterious
p.His83Cys	VUS	-53.1508	Deleterious	0.7785	Pathogenic	-14.255	Pathogenic	0.821	Disease	1	Probably damaging	0	Deleterious
p.His83Trp	VUS	-53.1508	Deleterious	0.8026	Pathogenic	-16.774	Pathogenic	0.864	Disease	0.999	Probably damaging	0	Deleterious
p.His83Phe	VUS	-53.1508	Deleterious	0.8484	Pathogenic	-14.898	Pathogenic	0.858	Disease	0.994	Probably damaging	0	Deleterious
p.Asp84Asn	Likely pathogenic	-53.1508	Deleterious	0.8357	Pathogenic	-11.468	Pathogenic	0.708	Disease	0.999	Probably damaging	0.52	Tolerated	32	Deleterious
p.Asp84Lys	VUS	-53.1508	Deleterious	0.9685	Pathogenic	-16.419	Pathogenic	0.778	Disease	1	Probably damaging	0.45	Tolerated
p.Asp84Thr	VUS	-53.1508	Deleterious	0.9381	Pathogenic	-12.782	Pathogenic	0.767	Disease	0.999	Probably damaging	0.36	Tolerated
p.Asp84Arg	VUS	-53.1508	Deleterious	0.9309	Pathogenic	-15.978	Pathogenic	0.765	Disease	1	Probably damaging	0.34	Tolerated
p.Asp84Ser	VUS	-53.1508	Deleterious	0.8767	Pathogenic	-11.876	Pathogenic	0.692	Disease	1	Probably damaging	0.55	Tolerated
p.Asp84Ile	VUS	-53.1508	Deleterious	0.9329	Pathogenic	-15.863	Pathogenic	0.777	Disease	1	Probably damaging	0.17	Tolerated
p.Asp84Met	VUS	-53.1508	Deleterious	0.9818	Pathogenic	-15.99	Pathogenic	0.767	Disease	1	Probably damaging	0.1	Tolerated
p.Asp84His	VUS	-53.1508	Deleterious	0.8323	Pathogenic	-12.457	Pathogenic	0.836	Disease	1	Probably damaging	0.24	Tolerated	32	Deleterious
p.Asp84Gln	VUS	-53.1508	Deleterious	0.9182	Pathogenic	-14.077	Pathogenic	0.672	Disease	1	Probably damaging	0.36	Tolerated
p.Asp84Pro	VUS	-53.1508	Deleterious	0.9957	Pathogenic	-18.922	Pathogenic	0.77	Disease	0.994	Probably damaging	0.26	Tolerated
p.Asp84Leu	VUS	-53.1508	Deleterious	0.8899	Pathogenic	-15.558	Pathogenic	0.775	Disease	1	Probably damaging	0.29	Tolerated
p.Asp84Glu	VUS	-11.5727	Indeterminate	0.7934	Pathogenic	-9.494	Pathogenic	0.685	Disease	0.983	Probably damaging	0.78	Tolerated	27.3	Deleterious
p.Asp84Ala	VUS	-53.1508	Deleterious	0.8398	Pathogenic	-11.915	Pathogenic	0.832	Disease	1	Probably damaging	0.73	Tolerated	31	Deleterious
p.Asp84Gly	VUS	-53.1508	Deleterious	0.9245	Pathogenic	-12.25	Pathogenic	0.822	Disease	1	Probably damaging	0.5	Tolerated	32	Deleterious
p.Asp84Val	VUS	-53.1508	Deleterious	0.8435	Pathogenic	-13.702	Pathogenic	0.839	Disease	0.999	Probably damaging	0.26	Tolerated	31	Deleterious
p.Asp84Tyr	VUS	-53.1508	Deleterious	0.7537	Pathogenic	-13.747	Pathogenic	0.843	Disease	1	Probably damaging	0.31	Tolerated	32	Deleterious
p.Asp84Cys	VUS	-53.1508	Deleterious	0.9561	Pathogenic	-14.289	Pathogenic	0.779	Disease	1	Probably damaging	0.09	Tolerated
p.Asp84Trp	VUS	-53.1508	Deleterious	0.9764	Pathogenic	-15.311	Pathogenic	0.778	Disease	1	Probably damaging	0.06	Tolerated
p.Asp84Phe	VUS	-53.1508	Deleterious	0.9455	Pathogenic	-14.89	Pathogenic	0.785	Disease	1	Probably damaging	0.28	Tolerated
p.Ala85Asn	VUS	-18.2593	Indeterminate	0.9879	Pathogenic	-15.325	Pathogenic	0.788	Disease	0.995	Probably damaging	0	Deleterious
p.Ala85Lys	VUS	-33.219	Indeterminate	0.9973	Pathogenic	-17.929	Pathogenic	0.829	Disease	1	Probably damaging	0	Deleterious
p.Ala85Thr	VUS	-17.8217	Indeterminate	0.6836	Pathogenic	-7.991	Pathogenic	0.834	Disease	0.999	Probably damaging	0	Deleterious	32	Deleterious
p.Ala85Arg	VUS	-33.2192	Indeterminate	0.978	Pathogenic	-14.779	Pathogenic	0.821	Disease	1	Probably damaging	0	Deleterious
p.Ala85Ser	VUS	-3.75151	Neutral	0.4337	Ambiguous	-9.738	Pathogenic	0.696	Disease	0.986	Probably damaging	0	Deleterious	31	Deleterious
p.Ala85Ile	VUS	-14.3175	Indeterminate	0.9512	Pathogenic	-15.306	Pathogenic	0.828	Disease	1	Probably damaging	0	Deleterious
p.Ala85Met	VUS	-1.40423	Neutral	0.9375	Pathogenic	-12.326	Pathogenic	0.781	Disease	1	Probably damaging	0	Deleterious
p.Ala85His	VUS	-27.3559	Indeterminate	0.9894	Pathogenic	-14.457	Pathogenic	0.831	Disease	1	Probably damaging	0	Deleterious
p.Ala85Gln	VUS	-17.6652	Indeterminate	0.9782	Pathogenic	-10.376	Pathogenic	0.83	Disease	1	Probably damaging	0	Deleterious
p.Ala85Pro	VUS	-13.7874	Indeterminate	0.9715	Pathogenic	-13.259	Pathogenic	0.856	Disease	1	Probably damaging	0	Deleterious	32	Deleterious
p.Ala85Leu	VUS	-2.77351	Neutral	0.8177	Pathogenic	-11.9	Pathogenic	0.814	Disease	0.999	Probably damaging	0	Deleterious
p.Ala85Asp	VUS	-33.2185	Indeterminate	0.9893	Pathogenic	-18.562	Pathogenic	0.872	Disease	0.999	Probably damaging	0	Deleterious	32	Deleterious
p.Ala85Glu	VUS	-33.1956	Indeterminate	0.986	Pathogenic	-16.148	Pathogenic	0.866	Disease	1	Probably damaging	0	Deleterious
p.Ala85Gly	VUS	-0.45736	Neutral	0.5102	Ambiguous	-10.762	Pathogenic	0.761	Disease	0.998	Probably damaging	0	Deleterious	31	Deleterious
p.Ala85Val	VUS	-9.0767	Indeterminate	0.7195	Pathogenic	-9.685	Pathogenic	0.638	Disease	0.998	Probably damaging	0	Deleterious	27.2	Deleterious
p.Ala85Tyr	VUS	-33.0956	Indeterminate	0.9938	Pathogenic	-16.677	Pathogenic	0.83	Disease	1	Probably damaging	0	Deleterious
p.Ala85Cys	VUS	-1.78294	Neutral	0.8193	Pathogenic	-9.919	Pathogenic	0.762	Disease	1	Probably damaging	0	Deleterious
p.Ala85Trp	VUS	-53.1508	Deleterious	0.9971	Pathogenic	-15.39	Pathogenic	0.851	Disease	1	Probably damaging	0	Deleterious
p.Ala85Phe	VUS	-30.243	Indeterminate	0.9849	Pathogenic	-15.979	Pathogenic	0.827	Disease	1	Probably damaging	0	Deleterious
p.Ala86Asn	VUS	-53.1508	Deleterious	0.9923	Pathogenic	-21.151	Pathogenic	0.819	Disease	0.975	Probably damaging	0	Deleterious
p.Ala86Lys	VUS	-53.1508	Deleterious	0.9984	Pathogenic	-22.109	Pathogenic	0.864	Disease	0.999	Probably damaging	0	Deleterious
p.Ala86Thr	VUS	-0.0625374	Neutral	0.4991	Ambiguous	-8.246	Pathogenic	0.869	Disease	0.959	Probably damaging	0.01	Deleterious	32	Deleterious
p.Ala86Arg	VUS	-53.1508	Deleterious	0.9881	Pathogenic	-17.107	Pathogenic	0.815	Disease	1	Probably damaging	0	Deleterious
p.Ala86Ser	VUS	-2.71111	Neutral	0.281	Benign	-7.748	Pathogenic	0.747	Disease	0.169	Benign	0.12	Tolerated	29.6	Deleterious
p.Ala86Ile	VUS	-5.79675	Indeterminate	0.8519	Pathogenic	-14.37	Pathogenic	0.854	Disease	1	Probably damaging	0	Deleterious
p.Ala86Met	VUS	-53.1508	Deleterious	0.906	Pathogenic	-15.484	Pathogenic	0.804	Disease	1	Probably damaging	0	Deleterious
p.Ala86His	VUS	-53.1508	Deleterious	0.9941	Pathogenic	-21.217	Pathogenic	0.851	Disease	1	Probably damaging	0	Deleterious
p.Ala86Gln	VUS	-53.1508	Deleterious	0.9798	Pathogenic	-20.626	Pathogenic	0.852	Disease	1	Probably damaging	0	Deleterious
p.Ala86Pro	VUS	-53.1508	Deleterious	0.9789	Pathogenic	-15.352	Pathogenic	0.917	Disease	0.998	Probably damaging	0.01	Deleterious	32	Deleterious
p.Ala86Leu	VUS	-53.1508	Deleterious	0.7887	Pathogenic	-13.857	Pathogenic	0.839	Disease	0.999	Probably damaging	0	Deleterious
p.Ala86Asp	VUS	-53.1508	Deleterious	0.9955	Pathogenic	-18.42	Pathogenic	0.919	Disease	0.996	Probably damaging	0	Deleterious	32	Deleterious
p.Ala86Glu	VUS	-53.1508	Deleterious	0.9873	Pathogenic	-18.096	Pathogenic	0.916	Disease	0.998	Probably damaging	0	Deleterious
p.Ala86Gly	VUS	-0.019767	Neutral	0.5397	Ambiguous	-10.003	Pathogenic	0.718	Disease	0.99	Probably damaging	0.03	Deleterious	31	Deleterious
p.Ala86Val	VUS	-0.0964476	Neutral	0.4564	Ambiguous	-8.223	Pathogenic	0.836	Disease	0.995	Probably damaging	0.01	Deleterious	32	Deleterious
p.Ala86Tyr	VUS	-53.1508	Deleterious	0.9965	Pathogenic	-20.612	Pathogenic	0.851	Disease	1	Probably damaging	0	Deleterious
p.Ala86Cys	VUS	-3.99762e-05	Neutral	0.716	Pathogenic	-9.008	Pathogenic	0.769	Disease	1	Probably damaging	0	Deleterious
p.Ala86Trp	VUS	-53.1508	Deleterious	0.998	Pathogenic	-18.816	Pathogenic	0.862	Disease	1	Probably damaging	0	Deleterious
p.Ala86Phe	VUS	-53.1508	Deleterious	0.9859	Pathogenic	-17.774	Pathogenic	0.869	Disease	1	Probably damaging	0	Deleterious
p.Arg87Asn	VUS	-3.50509	Neutral	0.972	Pathogenic	-12.314	Pathogenic	0.656	Disease	1	Probably damaging	0.12	Tolerated
p.Arg87Lys	VUS	-0.000752822	Neutral	0.583	Pathogenic	-7.993	Pathogenic	0.579	Disease	0.993	Probably damaging	0.17	Tolerated
p.Arg87Thr	VUS	-7.09026	Indeterminate	0.9022	Pathogenic	-9.787	Pathogenic	0.741	Disease	1	Probably damaging	0.88	Tolerated
p.Arg87Ser	VUS	-53.1508	Deleterious	0.9346	Pathogenic	-6.622	Benign	0.733	Disease	1	Probably damaging	0.53	Tolerated
p.Arg87Ile	VUS	-9.72982	Indeterminate	0.8709	Pathogenic	-11.765	Pathogenic	0.706	Disease	1	Probably damaging	0.04	Deleterious
p.Arg87Met	VUS	-19.9181	Indeterminate	0.9082	Pathogenic	-11.205	Pathogenic	0.68	Disease	0.999	Probably damaging	0.02	Deleterious
p.Arg87His	VUS	-33.2054	Indeterminate	0.6262	Pathogenic	-11.016	Pathogenic	0.64	Disease	0.999	Probably damaging	0.03	Deleterious
p.Arg87Gln	VUS	-31.794	Indeterminate	0.4766	Ambiguous	-9.612	Pathogenic	0.624	Disease	1	Probably damaging	0.08	Tolerated	32	Deleterious
p.Arg87Pro	Pathogenic	-53.1508	Deleterious	0.9811	Pathogenic	-17.26	Pathogenic	0.806	Disease	1	Probably damaging	0.08	Tolerated	32	Deleterious
p.Arg87Leu	VUS	-15.6719	Indeterminate	0.7068	Pathogenic	-12.082	Pathogenic	0.77	Disease	1	Probably damaging	0.05	Deleterious	32	Deleterious
p.Arg87Asp	VUS	-53.1508	Deleterious	0.9683	Pathogenic	-16.226	Pathogenic	0.692	Disease	1	Probably damaging	0.07	Tolerated
p.Arg87Glu	VUS	-53.1508	Deleterious	0.8133	Pathogenic	-13.219	Pathogenic	0.654	Disease	0.999	Probably damaging	0.06	Tolerated
p.Arg87Ala	VUS	-33.2193	Indeterminate	0.8485	Pathogenic	-7.664	Pathogenic	0.598	Disease	0.999	Probably damaging	0.16	Tolerated
p.Arg87Gly	VUS	-1.06773	Neutral	0.8043	Pathogenic	-8.754	Pathogenic	0.763	Disease	1	Probably damaging	0.07	Tolerated	27.8	Deleterious
p.Arg87Val	VUS	-6.1054	Indeterminate	0.8731	Pathogenic	-11.388	Pathogenic	0.697	Disease	1	Probably damaging	0.07	Tolerated
p.Arg87Tyr	VUS	-53.1508	Deleterious	0.8984	Pathogenic	-14.412	Pathogenic	0.657	Disease	0.979	Probably damaging	0.02	Deleterious
p.Arg87Cys	VUS	-0.106139	Neutral	0.7911	Pathogenic	-7.862	Pathogenic	0.756	Disease	1	Probably damaging	0.03	Deleterious
p.Arg87Trp	Likely pathogenic	-53.1508	Deleterious	0.6316	Pathogenic	-12.632	Pathogenic	0.575	Disease	0.395	Benign	0.01	Deleterious	31	Deleterious
p.Arg87Phe	VUS	-6.793	Indeterminate	0.9377	Pathogenic	-14.69	Pathogenic	0.675	Disease	0.979	Probably damaging	0.02	Deleterious
p.Glu88Asn	VUS	-8.96147	Indeterminate	0.7893	Pathogenic	-10.272	Pathogenic	0.439	Neutral	1	Probably damaging	0.63	Tolerated
p.Glu88Lys	VUS	-26.5472	Indeterminate	0.7692	Pathogenic	-11.553	Pathogenic	0.461	Neutral	0.98	Probably damaging	0.84	Tolerated	29	Deleterious
p.Glu88Thr	VUS	-13.656	Indeterminate	0.8562	Pathogenic	-7.38	Benign	0.261	Neutral	0.993	Probably damaging	0.93	Tolerated
p.Glu88Arg	VUS	-23.6525	Indeterminate	0.5865	Pathogenic	-11.022	Pathogenic	0.459	Neutral	0.996	Probably damaging	0.49	Tolerated
p.Glu88Ser	VUS	-8.02392	Indeterminate	0.6826	Pathogenic	-8.33	Pathogenic	0.29	Neutral	0.992	Probably damaging	1	Tolerated
p.Glu88Ile	VUS	-5.96787	Indeterminate	0.9304	Pathogenic	-11.789	Pathogenic	0.481	Neutral	0.991	Probably damaging	0.23	Tolerated
p.Glu88Met	VUS	-4.02341	Neutral	0.8959	Pathogenic	-10.442	Pathogenic	0.528	Disease	0.996	Probably damaging	0.12	Tolerated
p.Glu88His	VUS	-13.1792	Indeterminate	0.7291	Pathogenic	-10.464	Pathogenic	0.428	Neutral	0.998	Probably damaging	0.16	Tolerated
p.Glu88Gln	VUS	-9.17172	Indeterminate	0.3834	Ambiguous	-8.589	Pathogenic	0.355	Neutral	0.991	Probably damaging	0.55	Tolerated	26.9	Deleterious
p.Glu88Pro	VUS	-53.1508	Deleterious	0.9891	Pathogenic	-14.031	Pathogenic	0.547	Disease	0.996	Probably damaging	0.33	Tolerated
p.Glu88Leu	VUS	-11.276	Indeterminate	0.8529	Pathogenic	-9.54	Pathogenic	0.488	Neutral	0.939	Possibly damaging	0.33	Tolerated
p.Glu88Asp	VUS	-8.8867	Indeterminate	0.7631	Pathogenic	-8.593	Pathogenic	0.264	Neutral	0.98	Probably damaging	0.68	Tolerated	21.45	Deleterious
p.Glu88Ala	VUS	-4.75012	Neutral	0.5098	Ambiguous	-5.3	Benign	0.182	Neutral	0.499	Possibly damaging	0.9	Tolerated	22.7	Deleterious
p.Glu88Gly	VUS	-5.36182	Neutral	0.5315	Ambiguous	-8.429	Pathogenic	0.223	Neutral	0.998	Probably damaging	0.48	Tolerated	23.4	Deleterious
p.Glu88Val	VUS	-3.01708	Neutral	0.8221	Pathogenic	-9.899	Pathogenic	0.44	Neutral	0.892	Possibly damaging	0.38	Tolerated	26.9	Deleterious
p.Glu88Tyr	VUS	-7.58663	Indeterminate	0.8342	Pathogenic	-12.664	Pathogenic	0.495	Neutral	0.999	Probably damaging	0.11	Tolerated
p.Glu88Cys	VUS	-4.8755	Neutral	0.8882	Pathogenic	-10.646	Pathogenic	0.532	Disease	1	Probably damaging	0.1	Tolerated
p.Glu88Trp	VUS	-4.24749	Neutral	0.9523	Pathogenic	-14.185	Pathogenic	0.566	Disease	1	Probably damaging	0.03	Deleterious
p.Glu88Phe	VUS	-10.2099	Indeterminate	0.9337	Pathogenic	-12.783	Pathogenic	0.498	Neutral	0.999	Probably damaging	0.09	Tolerated
p.Gly89Asn	VUS	-16.9707	Indeterminate	0.9434	Pathogenic	-10.518	Pathogenic	0.81	Disease	1	Probably damaging	0	Deleterious
p.Gly89Lys	VUS	-53.1508	Deleterious	0.9852	Pathogenic	-17.072	Pathogenic	0.838	Disease	1	Probably damaging	0	Deleterious
p.Gly89Thr	VUS	-53.1508	Deleterious	0.9692	Pathogenic	-18.409	Pathogenic	0.817	Disease	1	Probably damaging	0	Deleterious
p.Gly89Arg	VUS	-53.1508	Deleterious	0.9629	Pathogenic	-15.205	Pathogenic	0.871	Disease	1	Probably damaging	0	Deleterious	32	Deleterious
p.Gly89Ser	VUS	-53.1508	Deleterious	0.8246	Pathogenic	-13.011	Pathogenic	0.836	Disease	1	Probably damaging	0	Deleterious	32	Deleterious
p.Gly89Ile	VUS	-53.1508	Deleterious	0.9909	Pathogenic	-21.625	Pathogenic	0.863	Disease	1	Probably damaging	0	Deleterious
p.Gly89Met	VUS	-53.1508	Deleterious	0.9948	Pathogenic	-19.695	Pathogenic	0.866	Disease	1	Probably damaging	0	Deleterious
p.Gly89His	VUS	-53.1508	Deleterious	0.9876	Pathogenic	-16.296	Pathogenic	0.842	Disease	1	Probably damaging	0	Deleterious
p.Gly89Gln	VUS	-53.1508	Deleterious	0.9814	Pathogenic	-17.419	Pathogenic	0.821	Disease	1	Probably damaging	0	Deleterious
p.Gly89Pro	VUS	-53.1508	Deleterious	0.998	Pathogenic	-17.631	Pathogenic	0.829	Disease	1	Probably damaging	0	Deleterious
p.Gly89Leu	VUS	-53.1508	Deleterious	0.991	Pathogenic	-18.751	Pathogenic	0.854	Disease	1	Probably damaging	0	Deleterious
p.Gly89Asp	VUS	-53.1508	Deleterious	0.9296	Pathogenic	-10.886	Pathogenic	0.86	Disease	1	Probably damaging	0	Deleterious	32	Deleterious
p.Gly89Glu	VUS	-53.1508	Deleterious	0.9738	Pathogenic	-15.051	Pathogenic	0.849	Disease	1	Probably damaging	0	Deleterious
p.Gly89Ala	VUS	-23.6094	Indeterminate	0.8544	Pathogenic	-12.936	Pathogenic	0.867	Disease	0.999	Probably damaging	0	Deleterious	29.3	Deleterious
p.Gly89Val	VUS	-53.1508	Deleterious	0.981	Pathogenic	-17.256	Pathogenic	0.907	Disease	1	Probably damaging	0	Deleterious	31	Deleterious
p.Gly89Tyr	VUS	-53.1508	Deleterious	0.9872	Pathogenic	-18.699	Pathogenic	0.848	Disease	1	Probably damaging	0	Deleterious
p.Gly89Cys	VUS	-53.1508	Deleterious	0.9645	Pathogenic	-14.56	Pathogenic	0.907	Disease	1	Probably damaging	0	Deleterious	32	Deleterious
p.Gly89Trp	VUS	-53.1508	Deleterious	0.9907	Pathogenic	-17.792	Pathogenic	0.893	Disease	1	Probably damaging	0	Deleterious
p.Gly89Phe	VUS	-53.1508	Deleterious	0.9964	Pathogenic	-19.662	Pathogenic	0.871	Disease	1	Probably damaging	0	Deleterious
p.Phe90Asn	VUS	-0.07654	Neutral	0.8549	Pathogenic	-9.534	Pathogenic	0.825	Disease	1	Probably damaging	0.15	Tolerated
p.Phe90Lys	VUS	-2.62759	Neutral	0.9421	Pathogenic	-5.704	Benign	0.785	Disease	1	Probably damaging	0.13	Tolerated
p.Phe90Thr	VUS	-3.68718	Neutral	0.9749	Pathogenic	-11.432	Pathogenic	0.827	Disease	1	Probably damaging	0.19	Tolerated
p.Phe90Arg	VUS	-0.308202	Neutral	0.8195	Pathogenic	-6.106	Benign	0.834	Disease	1	Probably damaging	0.14	Tolerated
p.Phe90Ser	VUS	-0.470469	Neutral	0.8915	Pathogenic	-8.461	Pathogenic	0.873	Disease	1	Probably damaging	0.33	Tolerated	32	Deleterious
p.Phe90Ile	VUS	-0.424382	Neutral	0.9075	Pathogenic	-9.548	Pathogenic	0.767	Disease	0.999	Probably damaging	0.15	Tolerated	32	Deleterious
p.Phe90Met	VUS	-0.0884661	Neutral	0.9148	Pathogenic	-6.675	Benign	0.756	Disease	1	Probably damaging	0.09	Tolerated
p.Phe90His	VUS	-0.170817	Neutral	0.6115	Pathogenic	-6.309	Benign	0.854	Disease	1	Probably damaging	0.36	Tolerated
p.Phe90Gln	VUS	-0.0550687	Neutral	0.8916	Pathogenic	-7.914	Pathogenic	0.812	Disease	1	Probably damaging	0.12	Tolerated
p.Phe90Pro	VUS	-8.66497	Indeterminate	0.9992	Pathogenic	-15.494	Pathogenic	0.826	Disease	1	Probably damaging	0.1	Tolerated
p.Phe90Leu	VUS	-0.0590504	Neutral	0.9825	Pathogenic	-4.194	Benign	0.802	Disease	0.999	Probably damaging	0.25	Tolerated	29.17	Deleterious
p.Phe90Asp	VUS	-17.5115	Indeterminate	0.9453	Pathogenic	-13.214	Pathogenic	0.767	Disease	1	Probably damaging	0.11	Tolerated
p.Phe90Glu	VUS	-1.91472	Neutral	0.963	Pathogenic	-12.391	Pathogenic	0.817	Disease	1	Probably damaging	0.12	Tolerated
p.Phe90Ala	VUS	-0.397642	Neutral	0.9492	Pathogenic	-8.678	Pathogenic	0.806	Disease	1	Probably damaging	0.43	Tolerated
p.Phe90Gly	VUS	-0.758297	Neutral	0.9762	Pathogenic	-11.209	Pathogenic	0.821	Disease	1	Probably damaging	0.19	Tolerated
p.Phe90Val	VUS	-1.39549	Neutral	0.8919	Pathogenic	-9.156	Pathogenic	0.849	Disease	0.999	Probably damaging	0.2	Tolerated	31	Deleterious
p.Phe90Tyr	VUS	-0.0503415	Neutral	0.1801	Benign	-7.156	Benign	0.721	Disease	0.987	Probably damaging	0.36	Tolerated	32	Deleterious
p.Phe90Cys	VUS	-0.460146	Neutral	0.7307	Pathogenic	-7.776	Pathogenic	0.882	Disease	1	Probably damaging	0.07	Tolerated	32	Deleterious
p.Phe90Trp	VUS	-0.343463	Neutral	0.6305	Pathogenic	-9.88	Pathogenic	0.71	Disease	1	Probably damaging	0.07	Tolerated
p.Leu91Asn	VUS	-0.0201779	Neutral	0.8419	Pathogenic	-17.484	Pathogenic	0.7	Disease	1	Probably damaging	0	Deleterious
p.Leu91Lys	VUS	-7.33936	Indeterminate	0.5184	Ambiguous	-13.806	Pathogenic	0.688	Disease	0.993	Probably damaging	0	Deleterious
p.Leu91Thr	VUS	-8.94941	Indeterminate	0.3834	Ambiguous	-11.504	Pathogenic	0.663	Disease	1	Probably damaging	0.01	Deleterious
p.Leu91Arg	VUS	-1.49464	Neutral	0.2806	Benign	-11.669	Pathogenic	0.827	Disease	0.999	Probably damaging	0	Deleterious	32	Deleterious
p.Leu91Ser	VUS	-18.2387	Indeterminate	0.6895	Pathogenic	-13.577	Pathogenic	0.723	Disease	1	Probably damaging	0	Deleterious
p.Leu91Ile	VUS	-19.5254	Indeterminate	0.2114	Benign	-10.905	Pathogenic	0.47	Neutral	0.57	Possibly damaging	0.24	Tolerated
p.Leu91Met	VUS	-33.0511	Indeterminate	0.3357	Benign	-8.491	Pathogenic	0.464	Neutral	1	Probably damaging	0.02	Deleterious	23.9	Deleterious
p.Leu91His	VUS	-16.6071	Indeterminate	0.5598	Ambiguous	-13.095	Pathogenic	0.719	Disease	1	Probably damaging	0	Deleterious
p.Leu91Gln	VUS	-0.159151	Neutral	0.4213	Ambiguous	-11.718	Pathogenic	0.523	Disease	1	Probably damaging	0	Deleterious	31	Deleterious
p.Leu91Pro	VUS	-7.4899	Indeterminate	0.4079	Ambiguous	-11.7	Pathogenic	0.841	Disease	1	Probably damaging	0	Deleterious	32	Deleterious
p.Leu91Asp	VUS	-6.27579	Indeterminate	0.9074	Pathogenic	-15.924	Pathogenic	0.692	Disease	1	Probably damaging	0	Deleterious
p.Leu91Glu	VUS	-4.76325	Neutral	0.6245	Pathogenic	-13.294	Pathogenic	0.675	Disease	1	Probably damaging	0	Deleterious
p.Leu91Ala	VUS	-1.03239	Neutral	0.4238	Ambiguous	-11.832	Pathogenic	0.612	Disease	1	Probably damaging	0.01	Deleterious
p.Leu91Gly	VUS	-4.74477	Neutral	0.6454	Pathogenic	-14.229	Pathogenic	0.68	Disease	1	Probably damaging	0	Deleterious
p.Leu91Val	VUS	-2.64842	Neutral	0.1689	Benign	-8.721	Pathogenic	0.387	Neutral	0.888	Possibly damaging	0.18	Tolerated	23.4	Deleterious
p.Leu91Tyr	VUS	-53.1508	Deleterious	0.7318	Pathogenic	-14.265	Pathogenic	0.597	Disease	0.996	Probably damaging	0	Deleterious
p.Leu91Cys	VUS	-0.685459	Neutral	0.749	Pathogenic	-13.624	Pathogenic	0.608	Disease	1	Probably damaging	0	Deleterious
p.Leu91Trp	VUS	-8.01946	Indeterminate	0.5174	Ambiguous	-13.639	Pathogenic	0.646	Disease	1	Probably damaging	0	Deleterious
p.Leu91Phe	VUS	-21.0873	Indeterminate	0.4145	Ambiguous	-10.967	Pathogenic	0.607	Disease	0.998	Probably damaging	0.02	Deleterious
p.Asp92Asn	VUS	-3.33641	Neutral	0.4396	Ambiguous	-10.261	Pathogenic	0.595	Disease	0.993	Probably damaging	0.35	Tolerated	32	Deleterious
p.Asp92Lys	VUS	-7.04567	Indeterminate	0.7779	Pathogenic	-13.341	Pathogenic	0.657	Disease	1	Probably damaging	0.05	Deleterious
p.Asp92Thr	VUS	-1.00055	Neutral	0.6917	Pathogenic	-11.065	Pathogenic	0.645	Disease	0.998	Probably damaging	0.04	Deleterious
p.Asp92Arg	VUS	-1.00542	Neutral	0.643	Pathogenic	-11.512	Pathogenic	0.64	Disease	1	Probably damaging	0.02	Deleterious
p.Asp92Ser	VUS	-3.98629	Neutral	0.4136	Ambiguous	-8.283	Pathogenic	0.576	Disease	1	Probably damaging	0.08	Tolerated
p.Asp92Ile	VUS	-2.31715	Neutral	0.9298	Pathogenic	-16.374	Pathogenic	0.635	Disease	1	Probably damaging	0	Deleterious
p.Asp92Met	VUS	-0.609019	Neutral	0.9641	Pathogenic	-14.356	Pathogenic	0.68	Disease	1	Probably damaging	0	Deleterious
p.Asp92His	VUS	-4.27507	Neutral	0.5663	Pathogenic	-11.152	Pathogenic	0.655	Disease	1	Probably damaging	0.03	Deleterious	32	Deleterious
p.Asp92Gln	VUS	-0.892134	Neutral	0.5609	Ambiguous	-10.846	Pathogenic	0.591	Disease	0.999	Probably damaging	0.03	Deleterious
p.Asp92Pro	VUS	-1.59344	Neutral	0.4936	Ambiguous	-10.199	Pathogenic	0.663	Disease	0.99	Probably damaging	0.03	Deleterious
p.Asp92Leu	VUS	-0.525409	Neutral	0.8186	Pathogenic	-12.763	Pathogenic	0.678	Disease	1	Probably damaging	0.01	Deleterious
p.Asp92Glu	VUS	-3.92584	Neutral	0.3017	Benign	-6.36	Benign	0.186	Neutral	0.934	Possibly damaging	0.07	Tolerated	22.8	Deleterious
p.Asp92Ala	VUS	-0.991296	Neutral	0.3843	Ambiguous	-7.594	Pathogenic	0.387	Neutral	1	Probably damaging	0.16	Tolerated	28.2	Deleterious
p.Asp92Gly	VUS	-5.17248	Neutral	0.3826	Ambiguous	-6.769	Benign	0.402	Neutral	1	Probably damaging	0.1	Tolerated	31	Deleterious
p.Asp92Val	VUS	-0.821747	Neutral	0.7553	Pathogenic	-12.766	Pathogenic	0.722	Disease	0.999	Probably damaging	0.01	Deleterious	30	Deleterious
p.Asp92Tyr	VUS	-4.06048	Neutral	0.7255	Pathogenic	-15.329	Pathogenic	0.778	Disease	1	Probably damaging	0.02	Deleterious	32	Deleterious
p.Asp92Cys	VUS	-0.573381	Neutral	0.9254	Pathogenic	-13.016	Pathogenic	0.63	Disease	1	Probably damaging	0.01	Deleterious
p.Asp92Trp	VUS	-3.71711	Neutral	0.9587	Pathogenic	-13.865	Pathogenic	0.672	Disease	1	Probably damaging	0	Deleterious
p.Asp92Phe	VUS	-4.81752	Neutral	0.9489	Pathogenic	-16.787	Pathogenic	0.677	Disease	1	Probably damaging	0.01	Deleterious
p.Thr93Asn	VUS	-16.5146	Indeterminate	0.697	Pathogenic	-9.47	Pathogenic	0.807	Disease	1	Probably damaging	0.07	Tolerated
p.Thr93Lys	VUS	-53.1508	Deleterious	0.9499	Pathogenic	-12.302	Pathogenic	0.862	Disease	1	Probably damaging	0.07	Tolerated	29.5	Deleterious
p.Thr93Arg	VUS	-33.1373	Indeterminate	0.914	Pathogenic	-15.351	Pathogenic	0.87	Disease	1	Probably damaging	0.04	Deleterious	29	Deleterious
p.Thr93Ser	VUS	-8.91031	Indeterminate	0.4599	Ambiguous	-8.446	Pathogenic	0.676	Disease	0.998	Probably damaging	0.29	Tolerated	26.9	Deleterious
p.Thr93Ile	VUS	-0.810524	Neutral	0.6269	Pathogenic	-9.657	Pathogenic	0.86	Disease	1	Probably damaging	0.23	Tolerated
p.Thr93Met	VUS	-13.2942	Indeterminate	0.4101	Ambiguous	-9.462	Pathogenic	0.797	Disease	1	Probably damaging	0.08	Tolerated	29.7	Deleterious
p.Thr93His	VUS	-25.8853	Indeterminate	0.8809	Pathogenic	-11.97	Pathogenic	0.779	Disease	1	Probably damaging	0.02	Deleterious
p.Thr93Gln	VUS	-20.8254	Indeterminate	0.8851	Pathogenic	-11.615	Pathogenic	0.745	Disease	0.999	Probably damaging	0.05	Deleterious
p.Thr93Pro	VUS	-53.1508	Deleterious	0.6064	Pathogenic	-14.328	Pathogenic	0.718	Disease	1	Probably damaging	0.08	Tolerated	28.2	Deleterious
p.Thr93Leu	VUS	-9.11594	Indeterminate	0.4735	Ambiguous	-11.973	Pathogenic	0.78	Disease	0.999	Probably damaging	0.39	Tolerated
p.Thr93Asp	VUS	-53.1508	Deleterious	0.933	Pathogenic	-15.099	Pathogenic	0.787	Disease	1	Probably damaging	0.05	Deleterious
p.Thr93Glu	VUS	-53.1508	Deleterious	0.9352	Pathogenic	-14.206	Pathogenic	0.793	Disease	1	Probably damaging	0.05	Deleterious
p.Thr93Ala	VUS	-23.126	Indeterminate	0.2995	Benign	-8.205	Pathogenic	0.678	Disease	0.996	Probably damaging	0.28	Tolerated	27.1	Deleterious
p.Thr93Gly	VUS	-23.7897	Indeterminate	0.6733	Pathogenic	-10.977	Pathogenic	0.73	Disease	1	Probably damaging	0.06	Tolerated
p.Thr93Val	VUS	-5.99259	Indeterminate	0.3711	Ambiguous	-7.085	Benign	0.514	Disease	0.998	Probably damaging	0.4	Tolerated
p.Thr93Tyr	VUS	-33.219	Indeterminate	0.9494	Pathogenic	-16.268	Pathogenic	0.81	Disease	1	Probably damaging	0.03	Deleterious
p.Thr93Cys	VUS	-9.43648	Indeterminate	0.6612	Pathogenic	-10.248	Pathogenic	0.768	Disease	1	Probably damaging	0.14	Tolerated
p.Thr93Trp	VUS	-24.6727	Indeterminate	0.9837	Pathogenic	-17.349	Pathogenic	0.791	Disease	1	Probably damaging	0.01	Deleterious
p.Thr93Phe	VUS	-15.2465	Indeterminate	0.9286	Pathogenic	-14.729	Pathogenic	0.805	Disease	1	Probably damaging	0.06	Tolerated
p.Leu94Asn	VUS	-32.6879	Indeterminate	0.986	Pathogenic	-19.968	Pathogenic	0.756	Disease	1	Probably damaging	0	Deleterious
p.Leu94Lys	VUS	-53.1508	Deleterious	0.9865	Pathogenic	-23.403	Pathogenic	0.749	Disease	0.994	Probably damaging	0.01	Deleterious
p.Leu94Thr	VUS	-32.2218	Indeterminate	0.6064	Pathogenic	-12.315	Pathogenic	0.701	Disease	1	Probably damaging	0.01	Deleterious
p.Leu94Arg	VUS	-53.1508	Deleterious	0.9491	Pathogenic	-19.072	Pathogenic	0.705	Disease	0.999	Probably damaging	0	Deleterious	32	Deleterious
p.Leu94Ser	VUS	-0.470002	Neutral	0.9449	Pathogenic	-15.677	Pathogenic	0.749	Disease	1	Probably damaging	0	Deleterious
p.Leu94Ile	VUS	-0.00836018	Neutral	0.1938	Benign	-6.649	Benign	0.313	Neutral	0.998	Probably damaging	0.09	Tolerated
p.Leu94Met	VUS	-0.00841261	Neutral	0.2911	Benign	-9.483	Pathogenic	0.472	Neutral	1	Probably damaging	0.03	Deleterious	24.1	Deleterious
p.Leu94His	VUS	-53.1508	Deleterious	0.9832	Pathogenic	-17.38	Pathogenic	0.797	Disease	1	Probably damaging	0	Deleterious
p.Leu94Gln	Likely pathogenic	-53.1508	Deleterious	0.9434	Pathogenic	-17.936	Pathogenic	0.858	Disease	1	Probably damaging	0.01	Deleterious	31	Deleterious
p.Leu94Pro	Likely pathogenic	-53.1508	Deleterious	0.9693	Pathogenic	-14.987	Pathogenic	0.916	Disease	1	Probably damaging	0.01	Deleterious	31	Deleterious
p.Leu94Asp	VUS	-53.1508	Deleterious	0.9968	Pathogenic	-19.017	Pathogenic	0.732	Disease	1	Probably damaging	0	Deleterious
p.Leu94Glu	VUS	-53.1508	Deleterious	0.9784	Pathogenic	-18.62	Pathogenic	0.735	Disease	1	Probably damaging	0	Deleterious
p.Leu94Ala	VUS	-33.2192	Indeterminate	0.5738	Pathogenic	-10.938	Pathogenic	0.638	Disease	1	Probably damaging	0.02	Deleterious
p.Leu94Gly	VUS	-53.1508	Deleterious	0.9556	Pathogenic	-16.15	Pathogenic	0.701	Disease	1	Probably damaging	0	Deleterious
p.Leu94Val	VUS	-3.55535	Neutral	0.096	Benign	-5.531	Benign	0.217	Neutral	0.996	Probably damaging	0.45	Tolerated	18.64	Deleterious
p.Leu94Tyr	VUS	-53.1508	Deleterious	0.9829	Pathogenic	-15.31	Pathogenic	0.677	Disease	0.996	Probably damaging	0.01	Deleterious
p.Leu94Cys	VUS	-8.77125	Indeterminate	0.8797	Pathogenic	-12.707	Pathogenic	0.631	Disease	1	Probably damaging	0	Deleterious
p.Leu94Trp	VUS	-53.1508	Deleterious	0.9769	Pathogenic	-16.426	Pathogenic	0.722	Disease	1	Probably damaging	0	Deleterious
p.Leu94Phe	VUS	-9.93755	Indeterminate	0.8065	Pathogenic	-10.876	Pathogenic	0.524	Disease	1	Probably damaging	0.03	Deleterious
p.Val95Asn	VUS	-4.64476	Neutral	0.5539	Ambiguous	-12.79	Pathogenic	0.37	Neutral	0.901	Possibly damaging	0.38	Tolerated
p.Val95Lys	VUS	-0.825482	Neutral	0.3308	Benign	-8.072	Pathogenic	0.188	Neutral	0.333	Benign	1	Tolerated
p.Val95Thr	VUS	-4.37941	Neutral	0.2304	Benign	-7.249	Benign	0.276	Neutral	0.667	Possibly damaging	0.45	Tolerated
p.Val95Arg	VUS	-3.32042	Neutral	0.1836	Benign	-6.754	Benign	0.17	Neutral	0.516	Possibly damaging	0.65	Tolerated
p.Val95Ser	VUS	-4.98823	Neutral	0.3177	Benign	-9.043	Pathogenic	0.329	Neutral	0.833	Possibly damaging	0.52	Tolerated
p.Val95Ile	VUS	-2.10692	Neutral	0.1425	Benign	-6.022	Benign	0.2	Neutral	0.005	Benign	0.18	Tolerated
p.Val95Met	VUS	-5.87616	Indeterminate	0.2892	Benign	-7.983	Pathogenic	0.12	Neutral	0.015	Benign	0.1	Tolerated	15.05	Deleterious
p.Val95His	VUS	-0.477764	Neutral	0.5271	Ambiguous	-10.301	Pathogenic	0.226	Neutral	0.947	Possibly damaging	0.15	Tolerated
p.Val95Gln	VUS	-11.3088	Indeterminate	0.2673	Benign	-7.771	Pathogenic	0.202	Neutral	0.418	Benign	0.56	Tolerated
p.Val95Pro	VUS	-53.1508	Deleterious	0.7501	Pathogenic	-13.482	Pathogenic	0.378	Neutral	0.818	Possibly damaging	0.25	Tolerated
p.Val95Leu	VUS	-1.9307	Neutral	0.1973	Benign	-7.697	Pathogenic	0.104	Neutral	0.004	Benign	0.28	Tolerated	13.66	Neutral
p.Val95Asp	VUS	-2.24013	Neutral	0.5199	Ambiguous	-13.25	Pathogenic	0.372	Neutral	0.988	Probably damaging	0.53	Tolerated
p.Val95Glu	VUS	-3.94643	Neutral	0.2418	Benign	-10.866	Pathogenic	0.406	Neutral	0.913	Possibly damaging	0.97	Tolerated	12.13	Neutral
p.Val95Ala	VUS	-0.532406	Neutral	0.1371	Benign	-5.306	Benign	0.087	Neutral	0.023	Benign	0.6	Tolerated	10.96	Neutral
p.Val95Gly	VUS	-2.19313	Neutral	0.2822	Benign	-9.771	Pathogenic	0.267	Neutral	0.926	Possibly damaging	0.29	Tolerated	14.08	Neutral
p.Val95Tyr	VUS	-5.69063	Neutral	0.6414	Pathogenic	-12.316	Pathogenic	0.374	Neutral	0.684	Possibly damaging	0.08	Tolerated
p.Val95Cys	VUS	-1.00553	Neutral	0.7598	Pathogenic	-7.332	Benign	0.373	Neutral	0.961	Probably damaging	0.05	Deleterious
p.Val95Trp	VUS	-8.18324	Indeterminate	0.8085	Pathogenic	-11.118	Pathogenic	0.396	Neutral	0.985	Probably damaging	0.03	Deleterious
p.Val95Phe	VUS	-6.72712	Indeterminate	0.2799	Benign	-12.403	Pathogenic	0.348	Neutral	0.516	Possibly damaging	0.07	Tolerated
p.Val96Asn	VUS	-5.0649	Neutral	0.7289	Pathogenic	-13.541	Pathogenic	0.507	Disease	0.772	Possibly damaging	0.02	Deleterious
p.Val96Lys	VUS	-0.444153	Neutral	0.7191	Pathogenic	-14.079	Pathogenic	0.514	Disease	0.051	Benign	0.04	Deleterious
p.Val96Thr	VUS	-0.491189	Neutral	0.2976	Benign	-6.391	Benign	0.232	Neutral	0.555	Possibly damaging	0.23	Tolerated
p.Val96Arg	VUS	-0.439361	Neutral	0.4778	Ambiguous	-10.882	Pathogenic	0.501	Disease	0.187	Benign	0.12	Tolerated
p.Val96Ser	VUS	-0.0477824	Neutral	0.4376	Ambiguous	-8.347	Pathogenic	0.412	Neutral	0.608	Possibly damaging	0.04	Deleterious
p.Val96Ile	VUS	-5.80832	Indeterminate	0.1363	Benign	-7.68	Pathogenic	0.104	Neutral	0.004	Benign	0.48	Tolerated
p.Val96Met	VUS	-0.696248	Neutral	0.3646	Ambiguous	-8.527	Pathogenic	0.106	Neutral	0.005	Benign	0.06	Tolerated	20.9	Deleterious
p.Val96His	VUS	-4.73037	Neutral	0.7703	Pathogenic	-12.653	Pathogenic	0.464	Neutral	0.539	Possibly damaging	0.01	Deleterious
p.Val96Gln	VUS	-2.81578	Neutral	0.538	Ambiguous	-11.348	Pathogenic	0.451	Neutral	0.071	Benign	0.03	Deleterious
p.Val96Pro	VUS	-1.22731	Neutral	0.7634	Pathogenic	-10.283	Pathogenic	0.475	Neutral	0.662	Possibly damaging	0.05	Deleterious
p.Val96Leu	VUS	-12.8272	Indeterminate	0.2539	Benign	-5.168	Benign	0.066	Neutral	0.001	Benign	0.36	Tolerated	15.88	Deleterious
p.Val96Asp	VUS	-10.7199	Indeterminate	0.7853	Pathogenic	-13.819	Pathogenic	0.586	Disease	0.902	Possibly damaging	0.02	Deleterious
p.Val96Glu	VUS	-1.00016	Neutral	0.5405	Ambiguous	-12.296	Pathogenic	0.285	Neutral	0.007	Benign	0.04	Deleterious	14.61	Neutral
p.Val96Ala	VUS	-53.1508	Deleterious	0.2136	Benign	-4.198	Benign	0.079	Neutral	0.002	Benign	0.32	Tolerated	6.237	Neutral
p.Val96Gly	VUS	-5.35194	Neutral	0.4053	Ambiguous	-10.467	Pathogenic	0.367	Neutral	0.796	Possibly damaging	0.01	Deleterious	18.21	Deleterious
p.Val96Tyr	VUS	-7.43299	Indeterminate	0.7911	Pathogenic	-13.565	Pathogenic	0.397	Neutral	0.833	Possibly damaging	0.02	Deleterious
p.Val96Cys	VUS	-8.48223	Indeterminate	0.766	Pathogenic	-6.529	Benign	0.377	Neutral	0.831	Possibly damaging	0.05	Deleterious
p.Val96Trp	VUS	-17.9817	Indeterminate	0.8816	Pathogenic	-11.545	Pathogenic	0.399	Neutral	0.98	Probably damaging	0.01	Deleterious
p.Val96Phe	VUS	-3.30422	Neutral	0.3632	Ambiguous	-10.933	Pathogenic	0.381	Neutral	0.446	Benign	0.04	Deleterious
p.Leu97Asn	VUS	-53.1508	Deleterious	0.9929	Pathogenic	-18.021	Pathogenic	0.898	Disease	1	Probably damaging	0	Deleterious
p.Leu97Lys	VUS	-53.1508	Deleterious	0.9869	Pathogenic	-20.26	Pathogenic	0.866	Disease	0.994	Probably damaging	0	Deleterious
p.Leu97Thr	VUS	-53.1508	Deleterious	0.974	Pathogenic	-14.283	Pathogenic	0.889	Disease	1	Probably damaging	0	Deleterious
p.Leu97Arg	VUS	-53.1508	Deleterious	0.9325	Pathogenic	-14.97	Pathogenic	0.976	Disease	0.999	Probably damaging	0	Deleterious	29.9	Deleterious
p.Leu97Ser	VUS	-53.1508	Deleterious	0.9912	Pathogenic	-12.949	Pathogenic	0.973	Disease	1	Probably damaging	0	Deleterious
p.Leu97Ile	VUS	-0.263869	Neutral	0.5969	Pathogenic	-12.022	Pathogenic	0.755	Disease	0.998	Probably damaging	0	Deleterious
p.Leu97Met	VUS	-0.0303429	Neutral	0.6247	Pathogenic	-8.974	Pathogenic	0.821	Disease	1	Probably damaging	0	Deleterious	28.2	Deleterious
p.Leu97His	VUS	-53.1508	Deleterious	0.9765	Pathogenic	-13.978	Pathogenic	0.963	Disease	1	Probably damaging	0	Deleterious
p.Leu97Gln	VUS	-53.1508	Deleterious	0.9516	Pathogenic	-13.042	Pathogenic	0.977	Disease	1	Probably damaging	0	Deleterious	29.2	Deleterious
p.Leu97Pro	VUS	-53.1508	Deleterious	0.9583	Pathogenic	-11.162	Pathogenic	0.988	Disease	1	Probably damaging	0	Deleterious	29.7	Deleterious
p.Leu97Asp	VUS	-53.1508	Deleterious	0.9983	Pathogenic	-18.543	Pathogenic	0.881	Disease	1	Probably damaging	0	Deleterious
p.Leu97Glu	VUS	-53.1508	Deleterious	0.9855	Pathogenic	-17.432	Pathogenic	0.903	Disease	1	Probably damaging	0	Deleterious
p.Leu97Ala	VUS	-53.1508	Deleterious	0.9489	Pathogenic	-12.121	Pathogenic	0.866	Disease	1	Probably damaging	0	Deleterious
p.Leu97Gly	VUS	-53.1508	Deleterious	0.98	Pathogenic	-16.624	Pathogenic	0.9	Disease	1	Probably damaging	0	Deleterious
p.Leu97Val	VUS	-11.8853	Indeterminate	0.6824	Pathogenic	-12.002	Pathogenic	0.864	Disease	0.996	Probably damaging	0	Deleterious	27.7	Deleterious
p.Leu97Tyr	VUS	-0.831866	Neutral	0.9699	Pathogenic	-14.705	Pathogenic	0.861	Disease	0.996	Probably damaging	0	Deleterious
p.Leu97Cys	VUS	-0.816216	Neutral	0.9414	Pathogenic	-13.952	Pathogenic	0.822	Disease	1	Probably damaging	0	Deleterious
p.Leu97Trp	VUS	-53.1508	Deleterious	0.9348	Pathogenic	-13.485	Pathogenic	0.893	Disease	1	Probably damaging	0	Deleterious
p.Leu97Phe	VUS	-0.446167	Neutral	0.7408	Pathogenic	-11.257	Pathogenic	0.86	Disease	1	Probably damaging	0	Deleterious
p.His98Asn	VUS	-0.6686	Neutral	0.6006	Pathogenic	-11.169	Pathogenic	0.567	Disease	0.997	Probably damaging	0.05	Deleterious	24.3	Deleterious
p.His98Lys	VUS	-1.46786	Neutral	0.8132	Pathogenic	-11.459	Pathogenic	0.542	Disease	0.648	Possibly damaging	0.08	Tolerated
p.His98Thr	VUS	-2.76757	Neutral	0.8741	Pathogenic	-13.121	Pathogenic	0.582	Disease	0.995	Probably damaging	0.16	Tolerated
p.His98Arg	VUS	-0.448114	Neutral	0.4032	Ambiguous	-6.795	Benign	0.32	Neutral	0.021	Benign	0.07	Tolerated	21.3	Deleterious
p.His98Ser	VUS	-3.54929	Neutral	0.6155	Pathogenic	-10.391	Pathogenic	0.554	Disease	0.999	Probably damaging	0.07	Tolerated
p.His98Ile	VUS	-0.497762	Neutral	0.8886	Pathogenic	-13.549	Pathogenic	0.613	Disease	0.984	Probably damaging	0.45	Tolerated
p.His98Met	VUS	-0.871958	Neutral	0.9337	Pathogenic	-13.32	Pathogenic	0.556	Disease	0.995	Probably damaging	0.23	Tolerated
p.His98Gln	VUS	-4.71409	Neutral	0.5458	Ambiguous	-7.968	Pathogenic	0.535	Disease	0.796	Possibly damaging	0.07	Tolerated	21.2	Deleterious
p.His98Pro	VUS	-53.1508	Deleterious	0.9124	Pathogenic	-16.704	Pathogenic	0.598	Disease	1	Probably damaging	0.07	Tolerated	23.9	Deleterious
p.His98Leu	VUS	-2.41521	Neutral	0.4531	Ambiguous	-10.136	Pathogenic	0.326	Neutral	0.87	Possibly damaging	1	Tolerated	21.1	Deleterious
p.His98Asp	VUS	-3.96515	Neutral	0.6312	Pathogenic	-11.832	Pathogenic	0.624	Disease	0.997	Probably damaging	0.03	Deleterious	24.6	Deleterious
p.His98Glu	VUS	-0.451459	Neutral	0.714	Pathogenic	-12.403	Pathogenic	0.546	Disease	0.991	Probably damaging	0.06	Tolerated
p.His98Ala	VUS	-0.198655	Neutral	0.6583	Pathogenic	-10.805	Pathogenic	0.556	Disease	0.998	Probably damaging	0.23	Tolerated
p.His98Gly	VUS	-2.34865	Neutral	0.7349	Pathogenic	-11.638	Pathogenic	0.557	Disease	1	Probably damaging	0.04	Deleterious
p.His98Val	VUS	-0.15756	Neutral	0.7307	Pathogenic	-10.196	Pathogenic	0.294	Neutral	1	Probably damaging	0.49	Tolerated
p.His98Tyr	VUS	-0.560878	Neutral	0.2623	Benign	-8.493	Pathogenic	0.54	Disease	0.983	Probably damaging	0.08	Tolerated	23.2	Deleterious
p.His98Cys	VUS	-0.935978	Neutral	0.6208	Pathogenic	-10.683	Pathogenic	0.54	Disease	1	Probably damaging	0.05	Deleterious
p.His98Trp	VUS	-0.286795	Neutral	0.6278	Pathogenic	-10.624	Pathogenic	0.592	Disease	1	Probably damaging	0.03	Deleterious
p.His98Phe	VUS	-0.369033	Neutral	0.7347	Pathogenic	-10.965	Pathogenic	0.383	Neutral	0.996	Probably damaging	0.21	Tolerated
p.Arg99Asn	VUS	-8.75881	Indeterminate	0.5313	Ambiguous	-11.414	Pathogenic	0.496	Neutral	0.958	Probably damaging	0.48	Tolerated
p.Arg99Lys	VUS	-6.836	Indeterminate	0.2293	Benign	-7.883	Pathogenic	0.402	Neutral	0.015	Benign	0.79	Tolerated
p.Arg99Thr	VUS	-18.0304	Indeterminate	0.3207	Benign	-12.371	Pathogenic	0.525	Disease	0.958	Probably damaging	0.25	Tolerated
p.Arg99Ser	VUS	-10.5606	Indeterminate	0.4364	Ambiguous	-10.446	Pathogenic	0.301	Neutral	0.99	Probably damaging	0.3	Tolerated
p.Arg99Ile	VUS	-7.16735	Indeterminate	0.5564	Ambiguous	-15.762	Pathogenic	0.537	Disease	0.999	Probably damaging	0.08	Tolerated
p.Arg99Met	VUS	-15.3228	Indeterminate	0.5306	Ambiguous	-14.305	Pathogenic	0.514	Disease	0.988	Probably damaging	0.05	Deleterious
p.Arg99His	VUS	-1.53223	Neutral	0.1437	Benign	-8.538	Pathogenic	0.472	Neutral	0.963	Probably damaging	0.07	Tolerated
p.Arg99Gln	VUS	-2.50745	Neutral	0.1211	Benign	-8.628	Pathogenic	0.311	Neutral	0.49	Possibly damaging	0.68	Tolerated	14.3	Neutral
p.Arg99Pro	Likely pathogenic	-53.1508	Deleterious	0.9146	Pathogenic	-15.875	Pathogenic	0.654	Disease	0.999	Probably damaging	0.13	Tolerated	22.4	Deleterious
p.Arg99Leu	VUS	-26.0399	Indeterminate	0.2472	Benign	-11.472	Pathogenic	0.349	Neutral	0.995	Probably damaging	0.14	Tolerated	17.52	Deleterious
p.Arg99Asp	VUS	-30.5439	Indeterminate	0.4469	Ambiguous	-12.386	Pathogenic	0.391	Neutral	0.99	Probably damaging	0.25	Tolerated
p.Arg99Glu	VUS	-10.5136	Indeterminate	0.2565	Benign	-11.971	Pathogenic	0.364	Neutral	0.586	Possibly damaging	1	Tolerated
p.Arg99Ala	VUS	-33.0846	Indeterminate	0.2617	Benign	-10.289	Pathogenic	0.388	Neutral	0.904	Possibly damaging	0.31	Tolerated
p.Arg99Gly	VUS	-1.22054	Neutral	0.1947	Benign	-9.366	Pathogenic	0.321	Neutral	0.995	Probably damaging	0.26	Tolerated	22.9	Deleterious
p.Arg99Val	VUS	-33.2192	Indeterminate	0.4828	Ambiguous	-13.312	Pathogenic	0.571	Disease	0.998	Probably damaging	0.12	Tolerated
p.Arg99Tyr	VUS	-3.06859	Neutral	0.5805	Pathogenic	-14.209	Pathogenic	0.489	Neutral	0.932	Possibly damaging	0.03	Deleterious
p.Arg99Cys	VUS	-21.7346	Indeterminate	0.3804	Ambiguous	-10.672	Pathogenic	0.547	Disease	1	Probably damaging	0.02	Deleterious
p.Arg99Trp	VUS	-21.3478	Indeterminate	0.3409	Ambiguous	-11.966	Pathogenic	0.517	Disease	0.999	Probably damaging	0.01	Deleterious	26.3	Deleterious
p.Arg99Phe	VUS	-4.69377	Neutral	0.6897	Pathogenic	-15.153	Pathogenic	0.549	Disease	0.932	Possibly damaging	0.02	Deleterious
p.Ala100Asn	VUS	-1.08019	Neutral	0.4496	Ambiguous	-6.826	Benign	0.327	Neutral	0.996	Probably damaging	0.32	Tolerated
p.Ala100Lys	VUS	-0.00035444	Neutral	0.6223	Pathogenic	-8.593	Pathogenic	0.529	Disease	1	Probably damaging	0.29	Tolerated
p.Ala100Thr	VUS	-1.43931	Neutral	0.2533	Benign	-10.195	Pathogenic	0.407	Neutral	0.997	Probably damaging	0.39	Tolerated	18.57	Deleterious
p.Ala100Arg	VUS	-0.000187041	Neutral	0.3656	Ambiguous	-4.541	Benign	0.515	Disease	1	Probably damaging	0.35	Tolerated
p.Ala100Ser	Benign	-0.00877295	Neutral	0.1502	Benign	-5.629	Benign	0.246	Neutral	0.972	Probably damaging	0.4	Tolerated	16.8	Deleterious
p.Ala100Ile	VUS	-0.0843269	Neutral	0.6148	Pathogenic	-13.158	Pathogenic	0.368	Neutral	1	Probably damaging	0.39	Tolerated
p.Ala100Met	VUS	-0.0501977	Neutral	0.4862	Ambiguous	-10.758	Pathogenic	0.466	Neutral	1	Probably damaging	0.22	Tolerated
p.Ala100His	VUS	-0.000567986	Neutral	0.2773	Benign	-2.801	Benign	0.469	Neutral	1	Probably damaging	0.54	Tolerated
p.Ala100Gln	VUS	-0.060883	Neutral	0.3302	Benign	-8.152	Pathogenic	0.481	Neutral	1	Probably damaging	0.29	Tolerated
p.Ala100Pro	VUS	-53.1508	Deleterious	0.9671	Pathogenic	-12.764	Pathogenic	0.564	Disease	0.999	Probably damaging	0.2	Tolerated	22.6	Deleterious
p.Ala100Leu	VUS	-0.0060813	Neutral	0.4268	Ambiguous	-8.477	Pathogenic	0.343	Neutral	1	Probably damaging	0.65	Tolerated
p.Ala100Asp	VUS	-1.07442	Neutral	0.6518	Pathogenic	-11.386	Pathogenic	0.595	Disease	0.999	Probably damaging	0.21	Tolerated	22.8	Deleterious
p.Ala100Glu	VUS	-3.6597	Neutral	0.4117	Ambiguous	-10.243	Pathogenic	0.322	Neutral	1	Probably damaging	0.28	Tolerated
p.Ala100Gly	VUS	-53.1508	Deleterious	0.1742	Benign	-5.185	Benign	0.266	Neutral	0.998	Probably damaging	0.34	Tolerated	19.2	Deleterious
p.Ala100Val	VUS	-0.000207161	Neutral	0.2647	Benign	-8.74	Pathogenic	0.26	Neutral	0.998	Probably damaging	0.5	Tolerated	22.4	Deleterious
p.Ala100Tyr	VUS	-1.41821	Neutral	0.5139	Ambiguous	-4.039	Benign	0.505	Disease	1	Probably damaging	1	Tolerated
p.Ala100Cys	VUS	-0.000506151	Neutral	0.4116	Ambiguous	-6.214	Benign	0.462	Neutral	1	Probably damaging	0.18	Tolerated
p.Ala100Trp	VUS	-2.12411e-06	Neutral	0.6812	Pathogenic	-4.527	Benign	0.55	Disease	1	Probably damaging	0.18	Tolerated
p.Ala100Phe	VUS	-0.00266404	Neutral	0.4423	Ambiguous	-4.043	Benign	0.358	Neutral	1	Probably damaging	0.7	Tolerated
p.Gly101Asn	VUS	-6.4256	Indeterminate	0.8106	Pathogenic	-12.58	Pathogenic	0.558	Disease	1	Probably damaging	0.09	Tolerated
p.Gly101Lys	VUS	-13.624	Indeterminate	0.7814	Pathogenic	-12.514	Pathogenic	0.42	Neutral	1	Probably damaging	0.09	Tolerated
p.Gly101Thr	VUS	-26.8401	Indeterminate	0.8392	Pathogenic	-13.879	Pathogenic	0.471	Neutral	1	Probably damaging	0.04	Deleterious
p.Gly101Arg	VUS	-10.3263	Indeterminate	0.6226	Pathogenic	-9.29	Pathogenic	0.53	Disease	1	Probably damaging	0.04	Deleterious	26.75	Deleterious
p.Gly101Ser	VUS	-7.04856	Indeterminate	0.5163	Ambiguous	-10.721	Pathogenic	0.542	Disease	0.999	Probably damaging	0.07	Tolerated
p.Gly101Ile	VUS	-53.1508	Deleterious	0.9774	Pathogenic	-19.7	Pathogenic	0.645	Disease	1	Probably damaging	0.01	Deleterious
p.Gly101Met	VUS	-14.549	Indeterminate	0.9705	Pathogenic	-15.369	Pathogenic	0.661	Disease	1	Probably damaging	0.01	Deleterious
p.Gly101His	VUS	-12.9585	Indeterminate	0.8225	Pathogenic	-11.045	Pathogenic	0.404	Neutral	1	Probably damaging	0.03	Deleterious
p.Gly101Gln	VUS	-7.17699	Indeterminate	0.7227	Pathogenic	-12.079	Pathogenic	0.434	Neutral	1	Probably damaging	0.25	Tolerated
p.Gly101Pro	VUS	-53.1508	Deleterious	0.9934	Pathogenic	-17.018	Pathogenic	0.618	Disease	1	Probably damaging	0.04	Deleterious
p.Gly101Leu	VUS	-53.1508	Deleterious	0.9599	Pathogenic	-14.187	Pathogenic	0.649	Disease	1	Probably damaging	0.02	Deleterious
p.Gly101Asp	VUS	-3.89949	Neutral	0.6576	Pathogenic	-11.78	Pathogenic	0.608	Disease	1	Probably damaging	0.17	Tolerated
p.Gly101Glu	VUS	-15.0248	Indeterminate	0.759	Pathogenic	-13.109	Pathogenic	0.628	Disease	1	Probably damaging	0.35	Tolerated	26.8	Deleterious
p.Gly101Ala	VUS	-11.6524	Indeterminate	0.6391	Pathogenic	-10.206	Pathogenic	0.506	Disease	0.996	Probably damaging	0.09	Tolerated	25.6	Deleterious
p.Gly101Val	VUS	-53.1508	Deleterious	0.9342	Pathogenic	-15.057	Pathogenic	0.672	Disease	1	Probably damaging	0.02	Deleterious	26.6	Deleterious
p.Gly101Tyr	VUS	-33.1674	Indeterminate	0.9532	Pathogenic	-15.854	Pathogenic	0.648	Disease	1	Probably damaging	0.01	Deleterious
p.Gly101Cys	VUS	-5.63707	Neutral	0.8484	Pathogenic	-12.72	Pathogenic	0.645	Disease	1	Probably damaging	0.01	Deleterious
p.Gly101Trp	Pathogenic	-53.1508	Deleterious	0.9495	Pathogenic	-14.73	Pathogenic	0.714	Disease	1	Probably damaging	0	Deleterious	28.9	Deleterious
p.Gly101Phe	VUS	-32.0117	Indeterminate	0.9773	Pathogenic	-15.882	Pathogenic	0.645	Disease	1	Probably damaging	0.01	Deleterious
p.Ala102Asn	VUS	-53.1508	Deleterious	0.9525	Pathogenic	-17.843	Pathogenic	0.801	Disease	0.906	Possibly damaging	0	Deleterious
p.Ala102Lys	VUS	-53.1508	Deleterious	0.9904	Pathogenic	-22.379	Pathogenic	0.833	Disease	0.997	Probably damaging	0	Deleterious
p.Ala102Thr	VUS	-53.1508	Deleterious	0.6023	Pathogenic	-11.133	Pathogenic	0.792	Disease	0.921	Possibly damaging	0.01	Deleterious	28.4	Deleterious
p.Ala102Arg	VUS	-53.1508	Deleterious	0.9445	Pathogenic	-18.16	Pathogenic	0.789	Disease	0.999	Probably damaging	0	Deleterious
p.Ala102Ser	VUS	-53.1508	Deleterious	0.2741	Benign	-9.435	Pathogenic	0.736	Disease	0.393	Benign	0.02	Deleterious	27	Deleterious
p.Ala102Ile	VUS	-53.1508	Deleterious	0.9049	Pathogenic	-16.425	Pathogenic	0.832	Disease	0.999	Probably damaging	0	Deleterious
p.Ala102Met	VUS	-53.1508	Deleterious	0.8938	Pathogenic	-15.762	Pathogenic	0.778	Disease	1	Probably damaging	0	Deleterious
p.Ala102His	VUS	-53.1508	Deleterious	0.9635	Pathogenic	-18.362	Pathogenic	0.806	Disease	1	Probably damaging	0	Deleterious
p.Ala102Gln	VUS	-53.1508	Deleterious	0.9233	Pathogenic	-17.474	Pathogenic	0.835	Disease	0.999	Probably damaging	0	Deleterious
p.Ala102Pro	VUS	-53.1508	Deleterious	0.9353	Pathogenic	-13.215	Pathogenic	0.856	Disease	0.995	Probably damaging	0.01	Deleterious	28.3	Deleterious
p.Ala102Leu	VUS	-53.1508	Deleterious	0.7181	Pathogenic	-14.148	Pathogenic	0.821	Disease	0.989	Probably damaging	0	Deleterious
p.Ala102Asp	VUS	-53.1508	Deleterious	0.9578	Pathogenic	-15.692	Pathogenic	0.876	Disease	0.988	Probably damaging	0	Deleterious
p.Ala102Glu	VUS	-53.1508	Deleterious	0.9565	Pathogenic	-16.007	Pathogenic	0.857	Disease	0.999	Probably damaging	0	Deleterious	27.7	Deleterious
p.Ala102Gly	VUS	-0.0294067	Neutral	0.2432	Benign	-8.208	Pathogenic	0.662	Disease	0.039	Benign	0.06	Tolerated	28.8	Deleterious
p.Ala102Val	VUS	-18.0143	Indeterminate	0.639	Pathogenic	-9.186	Pathogenic	0.753	Disease	0.998	Probably damaging	0.01	Deleterious	28.7	Deleterious
p.Ala102Tyr	VUS	-53.1508	Deleterious	0.9663	Pathogenic	-19.067	Pathogenic	0.832	Disease	0.999	Probably damaging	0	Deleterious
p.Ala102Cys	VUS	-12.4118	Indeterminate	0.6812	Pathogenic	-10.368	Pathogenic	0.754	Disease	0.999	Probably damaging	0	Deleterious
p.Ala102Trp	VUS	-53.1508	Deleterious	0.981	Pathogenic	-17.784	Pathogenic	0.83	Disease	1	Probably damaging	0	Deleterious
p.Ala102Phe	VUS	-53.1508	Deleterious	0.9308	Pathogenic	-18.426	Pathogenic	0.844	Disease	0.999	Probably damaging	0	Deleterious
p.Arg103Asn	VUS	-0.013621	Neutral	0.4251	Ambiguous	-11.536	Pathogenic	0.378	Neutral	0.996	Probably damaging	0.89	Tolerated
p.Arg103Lys	VUS	-0.482326	Neutral	0.2025	Benign	-7.775	Pathogenic	0.362	Neutral	0.775	Possibly damaging	0.26	Tolerated
p.Arg103Thr	VUS	-6.15613	Indeterminate	0.1995	Benign	-10.46	Pathogenic	0.5	Neutral	0.996	Probably damaging	0.17	Tolerated
p.Arg103Ser	VUS	-0.0121076	Neutral	0.2587	Benign	-9.192	Pathogenic	0.299	Neutral	0.998	Probably damaging	0.41	Tolerated
p.Arg103Ile	VUS	-3.14069	Neutral	0.3389	Benign	-12.156	Pathogenic	0.528	Disease	1	Probably damaging	0.02	Deleterious
p.Arg103Met	VUS	-3.90051	Neutral	0.3543	Ambiguous	-11.897	Pathogenic	0.535	Disease	0.998	Probably damaging	0.02	Deleterious
p.Arg103His	VUS	-0.98631	Neutral	0.1323	Benign	-7.95	Pathogenic	0.319	Neutral	0.994	Probably damaging	0.16	Tolerated
p.Arg103Gln	VUS	-0.972429	Neutral	0.1029	Benign	-8.154	Pathogenic	0.279	Neutral	0.944	Possibly damaging	0.17	Tolerated	19.34	Deleterious
p.Arg103Pro	VUS	-0.626483	Neutral	0.3065	Benign	-10.103	Pathogenic	0.576	Disease	1	Probably damaging	0.13	Tolerated	22.9	Deleterious
p.Arg103Leu	VUS	-0.00608239	Neutral	0.1593	Benign	-9.922	Pathogenic	0.546	Disease	0.999	Probably damaging	0.04	Deleterious	20.3	Deleterious
p.Arg103Asp	VUS	-0.000798319	Neutral	0.3581	Ambiguous	-10.154	Pathogenic	0.289	Neutral	0.998	Probably damaging	1	Tolerated
p.Arg103Glu	VUS	-2.72187	Neutral	0.2591	Benign	-10.018	Pathogenic	0.371	Neutral	0.896	Possibly damaging	0.28	Tolerated
p.Arg103Ala	VUS	-0.00166252	Neutral	0.1801	Benign	-8.3	Pathogenic	0.454	Neutral	0.983	Probably damaging	0.17	Tolerated
p.Arg103Gly	VUS	-0.0131756	Neutral	0.1779	Benign	-10.948	Pathogenic	0.323	Neutral	1	Probably damaging	0.52	Tolerated	22.6	Deleterious
p.Arg103Val	VUS	-0.161577	Neutral	0.2474	Benign	-9.948	Pathogenic	0.548	Disease	1	Probably damaging	0.03	Deleterious
p.Arg103Tyr	VUS	-0.629754	Neutral	0.4737	Ambiguous	-11.606	Pathogenic	0.5	Neutral	0.988	Probably damaging	0.08	Tolerated
p.Arg103Cys	VUS	-0.0082809	Neutral	0.2144	Benign	-9.271	Pathogenic	0.556	Disease	1	Probably damaging	0.04	Deleterious
p.Arg103Trp	VUS	-0.237152	Neutral	0.2676	Benign	-11.131	Pathogenic	0.539	Disease	1	Probably damaging	0.02	Deleterious	26.4	Deleterious
p.Arg103Phe	VUS	-0.00134895	Neutral	0.5257	Ambiguous	-12.213	Pathogenic	0.534	Disease	0.988	Probably damaging	0.03	Deleterious
p.Leu104Asn	VUS	-6.41084e-09	Neutral	0.8502	Pathogenic	-17.132	Pathogenic	0.624	Disease	1	Probably damaging	0	Deleterious
p.Leu104Lys	VUS	-11.3533	Indeterminate	0.7882	Pathogenic	-17.241	Pathogenic	0.636	Disease	0.982	Probably damaging	0.01	Deleterious
p.Leu104Thr	VUS	-2.4045e-06	Neutral	0.3934	Ambiguous	-9.663	Pathogenic	0.609	Disease	1	Probably damaging	0.02	Deleterious
p.Leu104Arg	VUS	-53.1508	Deleterious	0.5814	Pathogenic	-13.143	Pathogenic	0.728	Disease	0.998	Probably damaging	0.01	Deleterious	28	Deleterious
p.Leu104Ser	VUS	-2.07558e-08	Neutral	0.7933	Pathogenic	-12.464	Pathogenic	0.645	Disease	1	Probably damaging	0.01	Deleterious
p.Leu104Ile	VUS	0	Neutral	0.2168	Benign	-7.726	Pathogenic	0.453	Neutral	0.996	Probably damaging	0.41	Tolerated
p.Leu104Met	VUS	0	Neutral	0.2598	Benign	-5.419	Benign	0.46	Neutral	1	Probably damaging	0.04	Deleterious	25.7	Deleterious
p.Leu104His	VUS	0	Neutral	0.7805	Pathogenic	-14.473	Pathogenic	0.622	Disease	1	Probably damaging	0	Deleterious
p.Leu104Gln	VUS	-0.00369256	Neutral	0.6621	Pathogenic	-13.354	Pathogenic	0.694	Disease	1	Probably damaging	0.01	Deleterious	27.4	Deleterious
p.Leu104Pro	VUS	-0.00864371	Neutral	0.2401	Benign	-9.683	Pathogenic	0.266	Neutral	1	Probably damaging	0.01	Deleterious	24.5	Deleterious
p.Leu104Asp	VUS	-1.04001e-08	Neutral	0.9278	Pathogenic	-16.574	Pathogenic	0.639	Disease	1	Probably damaging	0	Deleterious
p.Leu104Glu	VUS	-0.000133341	Neutral	0.7798	Pathogenic	-15.904	Pathogenic	0.643	Disease	1	Probably damaging	0.01	Deleterious
p.Leu104Ala	VUS	0	Neutral	0.5071	Ambiguous	-10.474	Pathogenic	0.374	Neutral	1	Probably damaging	0.02	Deleterious
p.Leu104Gly	VUS	-53.1508	Deleterious	0.7488	Pathogenic	-12.869	Pathogenic	0.607	Disease	1	Probably damaging	0.01	Deleterious
p.Leu104Val	VUS	0	Neutral	0.1816	Benign	-7.257	Benign	0.161	Neutral	0.989	Probably damaging	0.84	Tolerated	23.5	Deleterious
p.Leu104Tyr	VUS	0	Neutral	0.8168	Pathogenic	-14.669	Pathogenic	0.546	Disease	0.989	Probably damaging	0.01	Deleterious
p.Leu104Cys	VUS	0	Neutral	0.7713	Pathogenic	-11.821	Pathogenic	0.558	Disease	1	Probably damaging	0.01	Deleterious
p.Leu104Trp	VUS	0	Neutral	0.5661	Pathogenic	-12.838	Pathogenic	0.567	Disease	1	Probably damaging	0	Deleterious
p.Leu104Phe	VUS	0	Neutral	0.439	Ambiguous	-10.345	Pathogenic	0.499	Neutral	0.999	Probably damaging	0.03	Deleterious
p.Asp105Asn	VUS	-2.86155	Neutral	0.2727	Benign	-8.411	Pathogenic	0.238	Neutral	0.978	Probably damaging	1	Tolerated	19.47	Deleterious
p.Asp105Lys	VUS	-15.8699	Indeterminate	0.8635	Pathogenic	-11.285	Pathogenic	0.496	Neutral	0.999	Probably damaging	0.15	Tolerated
p.Asp105Thr	VUS	-12.2135	Indeterminate	0.5806	Pathogenic	-7.968	Pathogenic	0.472	Neutral	0.995	Probably damaging	0.12	Tolerated
p.Asp105Arg	VUS	-32.9262	Indeterminate	0.7381	Pathogenic	-7.213	Benign	0.475	Neutral	0.999	Probably damaging	0.08	Tolerated
p.Asp105Ser	VUS	-53.1508	Deleterious	0.4241	Ambiguous	-7.284	Benign	0.431	Neutral	0.999	Probably damaging	0.26	Tolerated
p.Asp105Ile	VUS	-53.1508	Deleterious	0.861	Pathogenic	-13.448	Pathogenic	0.498	Neutral	0.999	Probably damaging	0.02	Deleterious
p.Asp105Met	VUS	-15.6854	Indeterminate	0.9269	Pathogenic	-11.011	Pathogenic	0.523	Disease	1	Probably damaging	0.01	Deleterious
p.Asp105His	VUS	-11.7095	Indeterminate	0.5656	Pathogenic	-6.835	Benign	0.303	Neutral	0.999	Probably damaging	0.1	Tolerated	23.1	Deleterious
p.Asp105Gln	VUS	-18.8513	Indeterminate	0.6735	Pathogenic	-7.916	Pathogenic	0.292	Neutral	0.998	Probably damaging	0.1	Tolerated
p.Asp105Pro	VUS	-53.1508	Deleterious	0.9092	Pathogenic	-11.629	Pathogenic	0.51	Disease	0.971	Probably damaging	0.08	Tolerated
p.Asp105Leu	VUS	-18.1704	Indeterminate	0.8148	Pathogenic	-8.909	Pathogenic	0.502	Disease	0.999	Probably damaging	0.18	Tolerated
p.Asp105Glu	VUS	-17.3814	Indeterminate	0.4885	Ambiguous	-6.272	Benign	0.269	Neutral	0.922	Possibly damaging	0.2	Tolerated	13.08	Neutral
p.Asp105Ala	VUS	-6.08212	Indeterminate	0.4992	Ambiguous	-6.149	Benign	0.421	Neutral	0.999	Probably damaging	0.11	Tolerated	24.1	Deleterious
p.Asp105Gly	VUS	-53.1508	Deleterious	0.4131	Ambiguous	-4.394	Benign	0.381	Neutral	0.999	Probably damaging	0.33	Tolerated	24.6	Deleterious
p.Asp105Val	VUS	-29.1592	Indeterminate	0.6699	Pathogenic	-9.734	Pathogenic	0.527	Disease	0.995	Probably damaging	0.03	Deleterious	25.9	Deleterious
p.Asp105Tyr	VUS	-0.000321536	Neutral	0.6581	Pathogenic	-11.049	Pathogenic	0.572	Disease	1	Probably damaging	0.05	Deleterious	23.4	Deleterious
p.Asp105Cys	VUS	-0.227681	Neutral	0.888	Pathogenic	-9.065	Pathogenic	0.493	Neutral	1	Probably damaging	0.02	Deleterious
p.Asp105Trp	VUS	-6.73342	Indeterminate	0.9483	Pathogenic	-10.193	Pathogenic	0.423	Neutral	1	Probably damaging	0.01	Deleterious
p.Asp105Phe	VUS	-16.1454	Indeterminate	0.9163	Pathogenic	-12.056	Pathogenic	0.509	Disease	1	Probably damaging	0.03	Deleterious
p.Val106Asn	VUS	-8.17163	Indeterminate	0.5709	Pathogenic	-13.949	Pathogenic	0.507	Disease	1	Probably damaging	0.03	Deleterious
p.Val106Lys	VUS	-16.7022	Indeterminate	0.5522	Ambiguous	-15.075	Pathogenic	0.55	Disease	0.999	Probably damaging	0.05	Deleterious
[truncated: 967 more rows]
