# Supplementary material for: Functional characterization of all CDKN2A missense variants and comparison to in silico models of pathogenicity
Source: eLife. 2025 Apr 16;13:RP95347. doi: 10.7554/eLife.95347 (PMC12002794; doi:10.7554/eLife.95347)
Supplement: Supplementary file 8. [file elife-95347-supp8.xlsx]

## Sheet: Appendix 1-table 8
Supplementary File 8. Assessment of in silico variant effect prediction models.
In silico model	Accuracy (%)	Sensitivity	Specificity	Positive predictive value	Negative predictive value
CADD	45.0549	0.967105	0.346966	0.228972	0.981343
Polyphen-2	39.5412	0.975238	0.270603	0.223483	0.980684
SIFT	60.8974	0.794286	0.569086	0.28406	0.927807
VEST	71.9298	0.908571	0.678557	0.378271	0.971814
AlphaMissense	71.5587	0.937143	0.667897	0.37788	0.980144
ESM1b	59.2443	0.952381	0.514965	0.297089	0.980484
PrimateAI-3D	85.3982	0.25	0.976064	0.678571	0.865566
