# Supplementary material for: Functional characterization of all CDKN2A missense variants and comparison to in silico models of pathogenicity
Source: eLife. 2025 Apr 16;13:RP95347. doi: 10.7554/eLife.95347 (PMC12002794; doi:10.7554/eLife.95347)
Supplement: Supplementary file 10. [file elife-95347-supp10.xlsx]

## Sheet: Appendix 1-table 10
Supplementary File 10. CDKN2A missense and synonymous variants reproted in gnomAD.
Residue	Variant	Transcript Consequence	Missense or synonymous	Benchmark	Functionally reported VUS	P value	Fucntional characterization	Allele Count	Allele Number	Allele Frequency	ClinVar Clinical Significance	ClinVar Variation ID
1	p.Met1Arg	c.2T>G	Missense			0.859926	Neutral	2	1440078	1.38881e-06	Uncertain significance	660169
1	p.Met1Lys	c.2T>A	Missense			0.994354	Neutral	11	1591956	6.90974e-06	Uncertain significance	487018
1	p.Met1Val	c.1A>G	Missense			0.0560056	Neutral	1	606364	1.64917e-06	Uncertain significance	820481
2	p.Glu2Gln	c.4G>C	Missense			1	Neutral	2	1592086	1.25621e-06	Uncertain significance	406722
2	p.Glu2Glu	c.6G>A	Synonymous			0.479132	Neutral	3	1439810	2.08361e-06	Likely benign	483322
2	p.Glu2Gly	c.5A>G	Missense			0.999999	Neutral	1	1439958	6.94465e-07
3	p.Pro3Ala	c.7C>G	Missense			0.0768582	Neutral	2	1439510	1.38936e-06
3	p.Pro3Leu	c.8C>T	Missense			3.00362e-05	Deleterious	2	1446148	1.38298e-06	Uncertain significance	1448238
3	p.Pro3Pro	c.9G>A	Synonymous			0.479132	Neutral	12	1598072	7.50905e-06	Likely benign	389468
3	p.Pro3Ser	c.7C>T	Missense			1.63735e-07	Deleterious	3	1591586	1.88491e-06	Uncertain significance	532281
3	p.Pro3Thr	c.7C>A	Missense			0.000559822	Deleterious	4	1439508	2.77873e-06
4	p.Ala4Ala	c.12G>A	Synonymous			0.479132	Neutral	1	152000	6.57895e-06	Likely benign	1101964
4	p.Ala4Ala	c.12G>T	Synonymous			0.479132	Neutral	1	1448522	6.90359e-07
4	p.Ala4Gly	c.11C>G	Missense			0.0104778	Deleterious	5	1447740	3.45366e-06	Uncertain significance	628437
4	p.Ala4Val	c.11C>T	Missense			0.925264	Neutral	1	1447738	6.90733e-07	Uncertain significance	1058585
5	p.Ala5Ala	c.15G>C	Synonymous			0.479132	Neutral	2	1449148	1.38012e-06
5	p.Ala5Ala	c.15G>A	Synonymous			0.479132	Neutral	2	1449148	1.38012e-06	Likely benign	2129711
5	p.Ala5Ala	c.15G>T	Synonymous			0.479132	Neutral	3	1449148	2.07018e-06	Likely benign	229890
5	p.Ala5Glu	c.14C>A	Missense			0.0111803	Deleterious	1	151816	6.58692e-06	Uncertain significance	489864
5	p.Ala5Thr	c.13G>A	Missense			0.587271	Neutral	6	1448480	4.14227e-06	Uncertain significance	233536
6	p.Gly6Glu	c.17G>A	Missense			0.606052	Neutral	2	1449782	1.37952e-06	Uncertain significance	483323
6	p.Gly6Trp	c.16G>T	Missense			0.105627	Neutral	1	616342	1.62248e-06	Uncertain significance	1525531
6	p.Gly6Val	c.17G>T	Missense			0.96715	Neutral	1	1449780	6.8976e-07	Uncertain significance	220777
7	p.Ser7Asn	c.20G>A	Missense			0.95256	Neutral	1	617530	1.61935e-06
7	p.Ser7Cys	c.19A>T	Missense			0.113703	Neutral	2	1450466	1.37887e-06	Uncertain significance	489865
7	p.Ser7Gly	c.19A>G	Missense			0.989304	Neutral	1	151766	6.58909e-06
8	p.Ser8Arg	c.22A>C	Missense			0.973917	Neutral	1	1451436	6.88973e-07	Uncertain significance	968555
8	p.Ser8Gly	c.22A>G	Missense			0.747086	Neutral	1	1451436	6.88973e-07	Uncertain significance	480814
9	p.Met9Arg	c.26T>G	Missense			0.949989	Neutral	7	1604276	4.36334e-06	Uncertain significance	821690
9	p.Met9Ile	c.27G>A	Missense			0.818778	Neutral	2	619538	3.22821e-06	Uncertain significance	656960
9	p.Met9Leu	c.25A>T	Missense			0.99216	Neutral	9	1604328	5.60983e-06	Uncertain significance	483321
9	p.Met9Lys	c.26T>A	Missense			0.854328	Neutral	48	1604394	2.99178e-05	Conflicting interpretations of pathogenicity	236985
9	p.Met9Thr	c.26T>C	Missense		Functionally neutral	0.828186	Neutral	2	1452556	1.37688e-06	Uncertain significance	483319
9	p.Met9Val	c.25A>G	Missense			0.72822	Neutral	1	151942	6.58146e-06	Uncertain significance	483345
10	p.Glu10Asp	c.30G>C	Missense			0.230442	Neutral	1	619520	1.61415e-06	Uncertain significance	822896
10	p.Glu10Asp	c.30G>T	Missense			0.230442	Neutral	2	619520	3.22831e-06
11	p.Pro11Leu	c.32C>T	Missense		Functionally neutral	0.290502	Neutral	2	1454026	1.37549e-06	Conflicting interpretations of pathogenicity	584734
11	p.Pro11Pro	c.33T>G	Synonymous			0.479132	Neutral	1	1454498	6.87522e-07
11	p.Pro11Pro	c.33T>C	Synonymous			0.479132	Neutral	1	1454498	6.87522e-07
11	p.Pro11Ser	c.31C>T	Missense			0.207899	Neutral	1	619456	1.61432e-06
12	p.Ser12Ser	c.36G>T	Synonymous			0.479132	Neutral	1	1455028	6.87272e-07	Likely benign	1559185
12	p.Ser12Ser	c.36G>A	Synonymous			0.479132	Neutral	2	1455028	1.37454e-06	Likely benign	1172273
13	p.Ala13Ala	c.39T>G	Synonymous			0.479132	Neutral	3	1607248	1.86654e-06	Likely benign	185104
13	p.Ala13Asp	c.38C>A	Missense			0.995304	Neutral	2	622070	3.21507e-06	Uncertain significance	483348
13	p.Ala13Gly	c.38C>G	Missense			0.998142	Neutral	1	622070	1.60754e-06
13	p.Ala13Pro	c.37G>C	Missense			0.999916	Neutral	1	1454934	6.87316e-07
13	p.Ala13Thr	c.37G>A	Missense			0.983046	Neutral	3	1454934	2.06195e-06
14	p.Asp14Glu	c.42C>A	Missense			0.251622	Neutral	2	622370	3.21352e-06	Uncertain significance	863866
15	p.Trp15Arg	c.43T>C	Missense			0.317683	Neutral	3	622444	4.81971e-06
15	p.Trp15Leu	c.44G>T	Missense			0.696048	Neutral	1	833110	1.20032e-06
16	p.Leu16Arg	c.47T>G	Missense	Pathogenic		1e-10	Deleterious	1	1455866	6.86876e-07	Pathogenic/Likely pathogenic	219815
16	p.Leu16Pro	c.47T>C	Missense	Pathogenic		1e-10	Deleterious	3	1455866	2.06063e-06	Pathogenic/Likely pathogenic	649266
17	p.Ala17Ala	c.51C>T	Synonymous			0.479132	Neutral	2	1454700	1.37485e-06	Likely benign	631355
17	p.Ala17Ala	c.51C>G	Synonymous			0.479132	Neutral	3	1606690	1.86719e-06	Likely benign	532299
17	p.Ala17Ala	c.51C>A	Synonymous			0.479132	Neutral	37	1606690	2.30287e-05	Benign/Likely benign	215440
17	p.Ala17Pro	c.49G>C	Missense			0.32387	Neutral	1	1456126	6.86754e-07
17	p.Ala17Val	c.50C>T	Missense			0.487761	Neutral	1	619864	1.61326e-06	Uncertain significance	825441
18	p.Thr18Ala	c.52A>G	Missense			1.64532e-10	Deleterious	2	620722	3.22205e-06	Conflicting interpretations of pathogenicity	920669
18	p.Thr18Lys	c.53C>A	Missense			6.08881e-05	Deleterious	1	152026	6.57782e-06	Uncertain significance	491580
18	p.Thr18Pro	c.52A>C	Missense		Functionally deleterious	1e-10	Deleterious	2	620722	3.22205e-06	Uncertain significance	232702
18	p.Thr18Thr	c.54G>C	Synonymous			0.479132	Neutral	1	621138	1.60995e-06	Likely benign	2560570
18	p.Thr18Thr	c.54G>T	Synonymous			0.479132	Neutral	1	621138	1.60995e-06	Likely benign	514155
18	p.Thr18Thr	c.54G>A	Synonymous			0.479132	Neutral	7	773146	9.05392e-06	Likely benign	1376569
19	p.Ala19Ala	c.57C>G	Synonymous			0.479132	Neutral	1	1455558	6.87022e-07	Likely benign	1077933
19	p.Ala19Ala	c.57C>A	Synonymous			0.479132	Neutral	2	1455558	1.37404e-06
19	p.Ala19Ala	c.57C>T	Synonymous			0.479132	Neutral	9	1607400	5.5991e-06	Likely benign	414094
19	p.Ala19Thr	c.55G>A	Missense			0.998108	Neutral	1	621320	1.60948e-06
20	p.Ala20Gly	c.59C>G	Missense		Functionally deleterious	2.33147e-15	Deleterious	2	1455702	1.37391e-06	Uncertain significance	220344
20	p.Ala20Ser	c.58G>T	Missense			3.21654e-08	Deleterious	2	1455404	1.37419e-06	Uncertain significance	664488
21	p.Ala21Ala	c.63C>G	Synonymous			0.479132	Neutral	1	623564	1.60368e-06
21	p.Ala21Asp	c.62C>A	Missense			1e-10	Deleterious	1	623328	1.60429e-06	Uncertain significance	1392805
22	p.Arg22Arg	c.66G>C	Synonymous			0.479132	Neutral	1	152034	6.57748e-06
22	p.Arg22Arg	c.64C>A	Synonymous			0.479132	Neutral	2	1457054	1.37263e-06	Likely benign	630709
22	p.Arg22Arg	c.66G>A	Synonymous			0.479132	Neutral	2	624216	3.20402e-06	Likely benign	230052
22	p.Arg22Gln	c.65G>A	Missense			1	Neutral	2	1456978	1.3727e-06	Uncertain significance	491581
22	p.Arg22Gly	c.64C>G	Missense			1e-10	Deleterious	2	1457056	1.37263e-06	Uncertain significance	863230
23	p.Gly23Asp	c.68G>A	Missense	Pathogenic		1e-10	Deleterious	2	833110	2.40064e-06	Pathogenic/Likely pathogenic	420108
24	p.Arg24Arg	c.72G>T	Synonymous			0.567389	Neutral	3	1458286	2.05721e-06	Likely benign	463511
24	p.Arg24Arg	c.72G>A	Synonymous			0.567389	Neutral	4	1458286	2.74295e-06
24	p.Arg24Gln	c.71G>A	Missense			1.31865e-05	Deleterious	6	1457942	4.11539e-06	Uncertain significance	406714
24	p.Arg24Gly	c.70C>G	Missense			0.128845	Neutral	1	624724	1.60071e-06	Uncertain significance	1481554
24	p.Arg24Pro	c.71G>C	Missense	Pathogenic		0	Deleterious	13	1609864	8.07522e-06	Pathogenic/Likely pathogenic	9415
25	p.Val25Ile	c.73G>A	Missense			0.706391	Neutral	1	833110	1.20032e-06	Uncertain significance	1376284
25	p.Val25Val	c.75A>T	Synonymous			0.479132	Neutral	1	1458796	6.85497e-07
25	p.Val25Val	c.75A>G	Synonymous			0.479132	Neutral	11	1458796	7.54046e-06	Likely benign	827146
26	p.Glu26Gln	c.76G>C	Missense			0.167292	Neutral	2	625858	3.19561e-06	Uncertain significance	919572
26	p.Glu26Glu	c.78G>A	Synonymous			0.479132	Neutral	1	833108	1.20032e-06	Likely benign	1761123
26	p.Glu26Val	c.77A>T	Missense			0.868903	Neutral	1	1459254	6.85282e-07
27	p.Glu27Ala	c.80A>C	Missense			0.117156	Neutral	1	626382	1.59647e-06	Uncertain significance	628014
27	p.Glu27Asp	c.81G>C	Missense			1.98247e-08	Deleterious	1	626370	1.5965e-06	Uncertain significance	483354
27	p.Glu27Asp	c.81G>T	Missense			1.98247e-08	Deleterious	2	151976	1.316e-05	Uncertain significance	949317
28	p.Val28Met	c.82G>A	Missense			0.819061	Neutral	1	626354	1.59654e-06	Uncertain significance	827567
28	p.Val28Val	c.84G>A	Synonymous			0.479132	Neutral	2	1460032	1.36983e-06	Conflicting interpretations of pathogenicity	917571
29	p.Arg29Arg	c.87G>C	Synonymous			0.479132	Neutral	1	1460268	6.84806e-07	Likely benign	927182
29	p.Arg29Arg	c.87G>A	Synonymous			0.479132	Neutral	20	1612530	1.24029e-05	Likely benign	230671
29	p.Arg29Pro	c.86G>C	Missense			1e-10	Deleterious	1	626996	1.59491e-06	Uncertain significance	1041690
30	p.Ala30Thr	c.88G>A	Missense			6.13339e-08	Deleterious	2	833108	2.40065e-06
30	p.Ala30Val	c.89C>T	Missense			0.00668782	Deleterious	3	1460210	2.0545e-06	Uncertain significance	246070
31	p.Leu31Leu	c.93G>A	Synonymous			0.479132	Neutral	2	1460414	1.36947e-06
32	p.Leu32Pro	c.95T>C	Missense	Pathogenic		0	Deleterious	6	833108	7.20195e-06	Pathogenic/Likely pathogenic	236992
32	p.Leu32Val	c.94C>G	Missense			0.96861	Neutral	3	1460394	2.05424e-06	Uncertain significance	532278
33	p.Glu33Glu	c.99G>A	Synonymous			0.479132	Neutral	1	627582	1.59342e-06
34	p.Ala34Ala	c.102G>C	Synonymous			0.567389	Neutral	33	779890	4.23137e-05
34	p.Ala34Glu	c.101C>A	Missense			0.219056	Neutral	1	1460594	6.84653e-07
34	p.Ala34Ser	c.100G>T	Missense			0.146517	Neutral	1	1460706	6.846e-07
34	p.Ala34Thr	c.100G>A	Missense			0.0201242	Neutral	10	1460706	6.846e-06	Uncertain significance	489862
34	p.Ala34Val	c.101C>T	Missense			0.000201667	Deleterious	2	1460594	1.36931e-06	Uncertain significance	483329
35	p.Gly35Ala	c.104G>C	Missense			0.00533711	Deleterious	64	1612992	3.96778e-05	Conflicting interpretations of pathogenicity	463481
35	p.Gly35Arg	c.103G>A	Missense		Functionally neutral	0.186916	Neutral	4	1460806	2.73821e-06	Uncertain significance	483347
35	p.Gly35Glu	c.104G>A	Missense		Functionally neutral	0.00073533	Deleterious	2	1460806	1.36911e-06	Uncertain significance	188292
35	p.Gly35Val	c.104G>T	Missense		Functionally deleterious	0	Deleterious	1	1460806	6.84554e-07	Uncertain significance	406709
36	p.Ala36Ala	c.108G>C	Synonymous			0.479132	Neutral	5	1458686	3.42774e-06	Likely benign	822139
36	p.Ala36Pro	c.106G>C	Missense			1e-10	Deleterious	1	1460710	6.84599e-07
36	p.Ala36Ser	c.106G>T	Missense			0.112087	Neutral	3	1460710	2.0538e-06	Uncertain significance	532277
36	p.Ala36Thr	c.106G>A	Missense			2.06254e-05	Deleterious	7	1612882	4.34006e-06	Uncertain significance	489863
36	p.Ala36Val	c.107C>T	Missense			0.956636	Neutral	7	617654	1.13332e-05	Uncertain significance	483324
37	p.Leu37Arg	c.110T>G	Missense			0.999986	Neutral	4	833108	4.8013e-06	Uncertain significance	1331763
37	p.Leu37Leu	c.109C>T	Synonymous			0.479132	Neutral	1	1458504	6.85634e-07	Likely benign	2563917
37	p.Leu37Leu	c.111G>A	Synonymous			0.479132	Neutral	1	625942	1.59759e-06	Likely benign	532301
38	p.Pro38Arg	c.113C>G	Missense			1e-10	Deleterious	1	1459894	6.84981e-07	Likely pathogenic	1730766
38	p.Pro38His	c.113C>A	Missense			1e-10	Deleterious	1	1459894	6.84981e-07
38	p.Pro38Ser	c.112C>T	Missense			6.06043e-06	Deleterious	1	626538	1.59607e-06	Uncertain significance	822217
39	p.Asn39Lys	c.117C>A	Missense			1.24279e-07	Deleterious	1	626904	1.59514e-06	Uncertain significance	220249
40	p.Ala40Gly	c.119C>G	Missense			0.520023	Neutral	1	626832	1.59532e-06
40	p.Ala40Ser	c.118G>T	Missense			0.561079	Neutral	7	1459870	4.79495e-06	Uncertain significance	491563
41	p.Pro41Ala	c.121C>G	Missense			0.828482	Neutral	2	1612966	1.23995e-06	Uncertain significance	406713
41	p.Pro41Gln	c.122C>A	Missense		Functionally neutral	0.178791	Neutral	6	1612890	3.72003e-06	Conflicting interpretations of pathogenicity	141111
41	p.Pro41Leu	c.122C>T	Missense			0.976674	Neutral	3	1460848	2.0536e-06	Uncertain significance	1755177
41	p.Pro41Pro	c.123G>A	Synonymous			0.479132	Neutral	1	627930	1.59253e-06	Conflicting interpretations of pathogenicity	923492
42	p.Asn42Asn	c.126T>C	Synonymous			0.479132	Neutral	3	628174	4.77575e-06	Likely benign	1101776
42	p.Asn42Ser	c.125A>G	Missense			0.10961	Neutral	3	1461208	2.0531e-06	Uncertain significance	406711
43	p.Ser43Gly	c.127A>G	Missense			0.0614273	Neutral	4	780364	5.12581e-06	Uncertain significance	630389
44	p.Tyr44Cys	c.131A>G	Missense			0.236197	Neutral	1	833108	1.20032e-06	Uncertain significance	630012
44	p.Tyr44Tyr	c.132C>T	Synonymous			0.479132	Neutral	4	1461440	2.73703e-06	Likely benign	483351
45	p.Gly45Arg	c.133G>C	Missense			0.706944	Neutral	1	1461522	6.84218e-07	Uncertain significance	463483
45	p.Gly45Ser	c.133G>A	Missense			0.00067365	Deleterious	1	1461522	6.84218e-07	Uncertain significance	463482
46	p.Arg46Gln	c.137G>A	Missense			5.0302e-05	Deleterious	1	628584	1.59088e-06	Uncertain significance	631208
47	p.Arg47Arg	c.139A>C	Synonymous			0.479132	Neutral	1	628580	1.59089e-06	Likely benign	1160771
48	p.Pro48Pro	c.144G>A	Synonymous			0.479132	Neutral	3	780826	3.84209e-06	Likely benign	232233
48	p.Pro48Thr	c.142C>A	Missense	Pathogenic		1.54746e-06	Deleterious	1	628604	1.59083e-06	Pathogenic/Likely pathogenic	188286
49	p.Ile49Ile	c.147C>A	Synonymous			0.479132	Neutral	77	1613900	4.77105e-05	Likely benign	184680
49	p.Ile49Ser	c.146T>G	Missense	Likely pathogenic		1e-10	Deleterious	2	1461744	1.36823e-06	Pathogenic/Likely pathogenic	430217
49	p.Ile49Thr	c.146T>C	Missense	Likely pathogenic		9.6349e-10	Deleterious	178	1613956	0.000110288	Conflicting interpretations of pathogenicity	127523
50	p.Gln50Arg	c.149A>G	Missense		Functionally deleterious	1e-10	Deleterious	1	628592	1.59086e-06	Pathogenic/Likely pathogenic	232304
50	p.Gln50Leu	c.149A>T	Missense			9.85871e-07	Deleterious	1	628592	1.59086e-06	Uncertain significance	133878
51	p.Val51Ile	c.151G>A	Missense			0.0208997	Neutral	7	1597372	4.3822e-06	Uncertain significance	463485
51	p.Val51Leu	c.151G>C	Missense			0.279856	Neutral	5	1445136	3.45988e-06
53	p.Met53Ile	c.159G>C	Missense	Pathogenic		1e-10	Deleterious	29	1597670	1.81514e-05	Pathogenic	9414
54	p.Met54Ile	c.162G>A	Missense			0.808745	Neutral	1	612304	1.63318e-06	Uncertain significance	819708
54	p.Met54Leu	c.160A>T	Missense			0.94486	Neutral	2	1445492	1.38361e-06	Uncertain significance	1483043
54	p.Met54Leu	c.160A>C	Missense			0.94486	Neutral	11	1597750	6.88468e-06	Conflicting interpretations of pathogenicity	463486
55	p.Gly55Ala	c.164G>C	Missense			0.000472923	Deleterious	1	1445362	6.91868e-07	Uncertain significance	2563916
55	p.Gly55Ser	c.163G>A	Missense			2.44552e-10	Deleterious	1	612334	1.6331e-06
55	p.Gly55Val	c.164G>T	Missense			1e-10	Deleterious	1	152332	6.56461e-06	Uncertain significance	2136747
56	p.Ser56Ile	c.167G>T	Missense	Pathogenic		1e-10	Deleterious	2	1445436	1.38367e-06	Pathogenic/Likely pathogenic	9425
57	p.Ala57Asp	c.170C>A	Missense			0.918522	Neutral	11	1597598	6.88534e-06	Uncertain significance	483325
57	p.Ala57Gly	c.170C>G	Missense			0.454135	Neutral	22	1597598	1.37707e-05	Uncertain significance	187272
57	p.Ala57Val	c.170C>T	Missense	Benign		0.894114	Neutral	163	1597598	0.000102028	Conflicting interpretations of pathogenicity	220562
58	p.Arg58Gly	c.172C>G	Missense			0.97592	Neutral	8	1445042	5.53617e-06	Uncertain significance	532285
59	p.Val59Gly	c.176T>G	Missense	Pathogenic		1.00142e-10	Deleterious	3	1444950	2.0762e-06	Pathogenic/Likely pathogenic	9423
59	p.Val59Met	c.175G>A	Missense			0.342635	Neutral	1	612098	1.63373e-06	Uncertain significance	1007891
60	p.Ala60Thr	c.178G>A	Missense			0.440589	Neutral	2	764162	2.61725e-06	Uncertain significance	406705
61	p.Glu61Asp	c.183G>C	Missense			0.561766	Neutral	1	1443704	6.92663e-07	Uncertain significance	236982
61	p.Glu61Lys	c.181G>A	Missense			0.869784	Neutral	1	611732	1.6347e-06
62	p.Leu62Val	c.184C>G	Missense			0.977796	Neutral	1	152214	6.5697e-06	Uncertain significance	969307
63	p.Leu63Pro	c.188T>C	Missense			1e-10	Deleterious	2	1443526	1.3855e-06	Conflicting interpretations of pathogenicity	1367946
66	p.His66Arg	c.197A>G	Missense		Functionally neutral	0.262148	Neutral	303	1594708	0.000190003	Conflicting interpretations of pathogenicity	246117
66	p.His66Gln	c.198C>G	Missense			0.465304	Neutral	9	1442770	6.238e-06	Uncertain significance	573530
67	p.Gly67Arg	c.199G>C	Missense		Functionally neutral	0.998307	Neutral	4	1442608	2.77276e-06	Conflicting interpretations of pathogenicity	216272
67	p.Gly67Asp	c.200G>A	Missense			0.859381	Neutral	3	761738	3.93836e-06	Uncertain significance	216273
67	p.Gly67Ser	c.199G>A	Missense			0.95557	Neutral	2	1442606	1.38638e-06	Uncertain significance	925139
68	p.Ala68Gly	c.203C>G	Missense			0.38408	Neutral	13	1441598	9.01777e-06	Uncertain significance	628976
68	p.Ala68Val	c.203C>T	Missense			0.000976625	Deleterious	1	1441598	6.93675e-07	Conflicting interpretations of pathogenicity	406701
69	p.Glu69Gly	c.206A>G	Missense			0.000119222	Deleterious	67	1593674	4.20412e-05	Conflicting interpretations of pathogenicity	186615
70	p.Pro70Arg	c.209C>G	Missense			0.724483	Neutral	1	1442188	6.93391e-07	Uncertain significance	185936
70	p.Pro70Thr	c.208C>A	Missense			0.0466446	Neutral	4	1441902	2.77411e-06	Uncertain significance	1374577
71	p.Asn71Ser	c.212A>G	Missense	Likely pathogenic		1e-10	Deleterious	6	1593656	3.76493e-06	Likely pathogenic	418121
71	p.Asn71Thr	c.212A>C	Missense			1e-10	Deleterious	4	1441448	2.77499e-06	Uncertain significance	1786361
73	p.Ala73Ala	c.219C>A	Synonymous			0.567389	Neutral	2	152226	1.31384e-05	Likely benign	653470
73	p.Ala73Thr	c.217G>A	Missense			0.677467	Neutral	1	606262	1.64945e-06	Uncertain significance	1986070
74	p.Asp74Asn	c.220G>A	Missense			5.1904e-12	Deleterious	1	605542	1.65141e-06	Uncertain significance	483340
75	p.Pro75Leu	c.224C>T	Missense			0.288569	Neutral	9	1596408	5.63766e-06	Uncertain significance	483326
75	p.Pro75Ser	c.223C>T	Missense			0.314679	Neutral	1	610794	1.63721e-06	Uncertain significance	644311
76	p.Ala76Ser	c.226G>T	Missense			0.00708967	Deleterious	1	152148	6.57255e-06	Uncertain significance	2059365
76	p.Ala76Thr	c.226G>A	Missense			0.141069	Neutral	18	1595206	1.12838e-05	Uncertain significance	489866
77	p.Thr77Ala	c.229A>G	Missense			0.0102697	Deleterious	1	611264	1.63595e-06	Uncertain significance	567670
77	p.Thr77Asn	c.230C>A	Missense			0.0435728	Neutral	2	1445234	1.38386e-06
78	p.Leu78Phe	c.232C>T	Missense			0.976854	Neutral	2	1445644	1.38347e-06	Uncertain significance	630762
79	p.Thr79Asn	c.236C>A	Missense			0.799529	Neutral	3	1603784	1.87058e-06	Uncertain significance	491570
79	p.Thr79Ile	c.236C>T	Missense			0.792201	Neutral	5	1451540	3.44462e-06	Uncertain significance	630548
80	p.Arg80Gln	c.239G>A	Missense			5.38447e-06	Deleterious	6	1451726	4.13301e-06	Uncertain significance	376385
80	p.Arg80Leu	c.239G>T	Missense			0.000641969	Deleterious	2	1451724	1.37767e-06
80	p.Arg80Pro	c.239G>C	Missense			1e-10	Deleterious	1	152196	6.57047e-06
81	p.Pro81Leu	c.242C>T	Missense		Functionally deleterious	1e-10	Deleterious	1	618752	1.61616e-06	Likely pathogenic	833629
81	p.Pro81Ser	c.241C>T	Missense			1e-10	Deleterious	1	152230	6.56901e-06	Uncertain significance	664812
82	p.Val82Leu	c.244G>T	Missense			0.0253531	Neutral	2	1451914	1.37749e-06	Uncertain significance	406718
82	p.Val82Met	c.244G>A	Missense			0.332708	Neutral	2	1451914	1.37749e-06	Uncertain significance	1063226
83	p.His83Arg	c.248A>G	Missense	Pathogenic		1e-10	Deleterious	1	152338	6.56435e-06	Conflicting interpretations of pathogenicity	376379
83	p.His83Asn	c.247C>A	Missense			1e-10	Deleterious	1	618816	1.61599e-06
83	p.His83Gln	c.249C>G	Missense			1e-10	Deleterious	1	1452118	6.88649e-07	Pathogenic	376381
83	p.His83Gln	c.249C>A	Missense			1e-10	Deleterious	2	1452116	1.3773e-06	Conflicting interpretations of pathogenicity	429110
84	p.Asp84Ala	c.251A>C	Missense		Functionally deleterious	1e-10	Deleterious	7	1452176	4.82035e-06	Conflicting interpretations of pathogenicity	142882
84	p.Asp84Tyr	c.250G>T	Missense		Functionally deleterious	1e-10	Deleterious	1	619038	1.61541e-06	Conflicting interpretations of pathogenicity	376306
85	p.Ala85Ser	c.253G>T	Missense			0.0742478	Neutral	5	771240	6.48307e-06	Uncertain significance	532289
85	p.Ala85Thr	c.253G>A	Missense			4.31663e-06	Deleterious	3	619004	4.8465e-06	Uncertain significance	236983
86	p.Ala86Ser	c.256G>T	Missense			0.152712	Neutral	1	619124	1.61519e-06	Uncertain significance	1793230
86	p.Ala86Thr	c.256G>A	Missense			0.957578	Neutral	3	771478	3.88864e-06
87	p.Arg87Trp	c.259C>T	Missense	Likely pathogenic		1e-10	Deleterious	6	1604616	3.73921e-06	Likely pathogenic	406707
88	p.Glu88Gln	c.262G>C	Missense			0.00173395	Deleterious	1	619464	1.6143e-06	Uncertain significance	619828
89	p.Gly89Ser	c.265G>A	Missense			1e-10	Deleterious	4	619634	6.45542e-06	Uncertain significance	9408
91	p.Leu91Arg	c.272T>G	Missense			0.35487	Neutral	1	1453016	6.88224e-07
92	p.Asp92Glu	c.276C>A	Missense			0.0657969	Neutral	2	619946	3.22609e-06	Uncertain significance	645261
93	p.Thr93Met	c.278C>T	Missense			9.95532e-05	Deleterious	1	619998	1.61291e-06	Uncertain significance	1796019
96	p.Val96Gly	c.287T>G	Missense			0.0244852	Neutral	1	1453218	6.88128e-07
96	p.Val96Leu	c.286G>T	Missense			0.000137607	Deleterious	1	1453266	6.88105e-07	Uncertain significance	2106366
96	p.Val96Met	c.286G>A	Missense			0.617175	Neutral	1	1453266	6.88105e-07	Uncertain significance	821875
98	p.His98Asn	c.292C>A	Missense			0.629117	Neutral	1	620158	1.61249e-06
98	p.His98Tyr	c.292C>T	Missense			0.67789	Neutral	1	620158	1.61249e-06	Uncertain significance	419560
99	p.Arg99Gln	c.296G>A	Missense			0.175866	Neutral	4	1453046	2.75284e-06	Conflicting interpretations of pathogenicity	628568
99	p.Arg99Gly	c.295C>G	Missense		Functionally neutral	0.429122	Neutral	7	1453094	4.81731e-06	Conflicting interpretations of pathogenicity	372062
99	p.Arg99Trp	c.295C>T	Missense			3.74698e-07	Deleterious	3	1453094	2.06456e-06	Uncertain significance	483350
100	p.Ala100Ser	c.298G>T	Missense	Benign		0.993938	Neutral	98	1605346	6.1046e-05	Conflicting interpretations of pathogenicity	127524
100	p.Ala100Thr	c.298G>A	Missense			0.368744	Neutral	1	1453014	6.88225e-07	Uncertain significance	629701
100	p.Ala100Val	c.299C>T	Missense			0.999856	Neutral	2	772064	2.59046e-06	Uncertain significance	924911
101	p.Gly101Arg	c.301G>A	Missense		Functionally neutral	0.000778901	Deleterious	4	1605208	2.49189e-06	Uncertain significance	463494
101	p.Gly101Arg	c.301G>C	Missense		Functionally neutral	0.000778901	Deleterious	7	1452982	4.81768e-06	Uncertain significance	216274
101	p.Gly101Trp	c.301G>T	Missense	Pathogenic		1e-10	Deleterious	12	1605210	7.47566e-06	Pathogenic	9412
102	p.Ala102Thr	c.304G>A	Missense			1e-10	Deleterious	2	772270	2.58977e-06	Uncertain significance	463495
102	p.Ala102Val	c.305C>T	Missense			3.77702e-06	Deleterious	5	1452980	3.4412e-06	Uncertain significance	234071
103	p.Arg103Gln	c.308G>A	Missense			0.509647	Neutral	1	833110	1.20032e-06	Uncertain significance	1141816
103	p.Arg103Trp	c.307C>T	Missense			0.848418	Neutral	12	1605324	7.47513e-06	Uncertain significance	423630
105	p.Asp105Asn	c.313G>A	Missense			0.13759	Neutral	2	1453262	1.37621e-06	Uncertain significance	491573
105	p.Asp105Glu	c.315C>A	Missense			5.85704e-06	Deleterious	20	1605504	1.24571e-05	Conflicting interpretations of pathogenicity	406702
106	p.Val106Ala	c.317T>C	Missense			0.0203566	Neutral	2	833110	2.40064e-06	Uncertain significance	463497
106	p.Val106Gly	c.317T>G	Missense			0.00129781	Deleterious	1	833110	1.20032e-06
106	p.Val106Leu	c.316G>C	Missense			0.00113842	Deleterious	1	1453226	6.88124e-07	Uncertain significance	1318653
106	p.Val106Leu	c.316G>T	Missense			0.00113842	Deleterious	1	152232	6.56892e-06	Uncertain significance	1728421
106	p.Val106Met	c.316G>A	Missense			0.572235	Neutral	1	1453226	6.88124e-07	Uncertain significance	1392243
107	p.Arg107Cys	c.319C>T	Missense			0.0027354	Deleterious	3	1453408	2.06411e-06	Conflicting interpretations of pathogenicity	483352
107	p.Arg107Gly	c.319C>G	Missense			0.330931	Neutral	2	1453408	1.37608e-06
107	p.Arg107His	c.320G>A	Missense			0.315812	Neutral	25	1605852	1.55681e-05	Conflicting interpretations of pathogenicity	182413
107	p.Arg107Leu	c.320G>T	Missense			0.237246	Neutral	1	1453632	6.87932e-07
107	p.Arg107Ser	c.319C>A	Missense			0.0876282	Neutral	1	1453408	6.88038e-07	Uncertain significance	463498
108	p.Asp108Val	c.323A>T	Missense			1e-10	Deleterious	1	620726	1.61102e-06
109	p.Ala109Ala	c.327C>T	Synonymous			0.567389	Neutral	1	1454144	6.8769e-07	Likely benign	1123298
109	p.Ala109Pro	c.325G>C	Missense		Functionally deleterious	0	Deleterious	19	1606256	1.18287e-05	Uncertain significance	127525
110	p.Trp110Arg	c.328T>C	Missense			0.917379	Neutral	1	152190	6.57073e-06	Uncertain significance	2109926
110	p.Trp110Gly	c.328T>G	Missense			0.893184	Neutral	1	621072	1.61012e-06
111	p.Gly111Ser	c.331G>A	Missense		Functionally neutral	0.814835	Neutral	6	1454378	4.12547e-06	Uncertain significance	463499
111	p.Gly111Val	c.332G>T	Missense			1e-10	Deleterious	1	621180	1.60984e-06	Uncertain significance	1487529
112	p.Arg112Gly	c.334C>G	Missense	Pathogenic		1.39502e-09	Deleterious	2	1454592	1.37496e-06	Pathogenic/Likely pathogenic	233484
112	p.Arg112His	c.335G>A	Missense			0.424605	Neutral	1	1454582	6.87483e-07	Uncertain significance	142887
112	p.Arg112Leu	c.335G>T	Missense			4.24197e-05	Deleterious	7	1606934	4.35612e-06	Uncertain significance	823661
113	p.Leu113Val	c.337C>G	Missense			0.914707	Neutral	1	152250	6.56814e-06
114	p.Pro114Ser	c.340C>T	Missense			0.00186219	Deleterious	1	152346	6.56401e-06	Uncertain significance	1405931
115	p.Val115Glu	c.344T>A	Missense			0.00170168	Deleterious	10	1607670	6.22018e-06	Uncertain significance	246437
115	p.Val115Leu	c.343G>T	Missense			0.13469	Neutral	32	1607650	1.99048e-05	Uncertain significance	419130
115	p.Val115Met	c.343G>A	Missense			0.369822	Neutral	3	1455412	2.06127e-06	Uncertain significance	1469323
116	p.Asp116Glu	c.348C>G	Missense			0.300594	Neutral	1	622926	1.60533e-06
116	p.Asp116Tyr	c.346G>T	Missense			0.562535	Neutral	1	622770	1.60573e-06	Uncertain significance	2563909
117	p.Leu117Gln	c.350T>A	Missense			0.0687407	Neutral	1	833110	1.20032e-06
118	p.Ala118Gly	c.353C>G	Missense			0.133648	Neutral	1	623472	1.60392e-06
118	p.Ala118Thr	c.352G>A	Missense			0.0337412	Neutral	7	1608806	4.35105e-06	Uncertain significance	491574
118	p.Ala118Val	c.353C>T	Missense			0.00991208	Deleterious	1	623472	1.60392e-06	Conflicting interpretations of pathogenicity	406719
119	p.Glu119Glu	c.357G>A	Synonymous			0.479132	Neutral	1	623920	1.60277e-06
119	p.Glu119Lys	c.355G>A	Missense			0.811981	Neutral	2	1456610	1.37305e-06	Uncertain significance	570565
120	p.Glu120Asp	c.360G>T	Missense			0.205674	Neutral	5	1457182	3.43128e-06	Uncertain significance	823988
120	p.Glu120Gln	c.358G>C	Missense			0.0561948	Neutral	1	623948	1.6027e-06
120	p.Glu120Glu	c.360G>A	Synonymous			0.567389	Neutral	2	1457184	1.37251e-06	Likely benign	463502
120	p.Glu120Val	c.359A>T	Missense			0.327136	Neutral	1	624016	1.60252e-06
121	p.Leu121Arg	c.362T>G	Missense			0.00024334	Deleterious	1	152228	6.56909e-06
121	p.Leu121Leu	c.361C>T	Synonymous			0.479132	Neutral	146	1609492	9.07119e-05	Benign/Likely benign	630387
121	p.Leu121Met	c.361C>A	Missense			1e-10	Deleterious	1	1457230	6.86233e-07
121	p.Leu121Val	c.361C>G	Missense			0.9726	Neutral	29	1609610	1.80168e-05	Conflicting interpretations of pathogenicity	219905
122	p.Gly122Asp	c.365G>A	Missense			0.954669	Neutral	1	1457356	6.86174e-07
122	p.Gly122Gly	c.366C>G	Synonymous			0.620746	Neutral	1	624330	1.60172e-06
122	p.Gly122Gly	c.366C>T	Synonymous			0.620746	Neutral	1	624330	1.60172e-06	Likely benign	1133481
122	p.Gly122Val	c.365G>T	Missense			0.490042	Neutral	38	1609606	2.36083e-05	Conflicting interpretations of pathogenicity	182419
123	p.His123Gln	c.369T>A	Missense	Benign		0.101048	Neutral	359	1610194	0.000222955	Conflicting interpretations of pathogenicity	127526
123	p.His123His	c.369T>C	Synonymous			0.620746	Neutral	15	1610076	9.31633e-06	Likely benign	220829
124	p.Arg124Cys	c.370C>T	Missense		Functionally neutral	0.386286	Neutral	73	1610132	4.53379e-05	Conflicting interpretations of pathogenicity	231362
124	p.Arg124Gly	c.370C>G	Missense			0.00047318	Deleterious	9	1610014	5.59001e-06	Uncertain significance	582036
124	p.Arg124His	c.371G>A	Missense			0.804725	Neutral	1	624836	1.60042e-06
125	p.Asp125Asn	c.373G>A	Missense			0.62054	Neutral	2	1610302	1.242e-06	Uncertain significance	858988
125	p.Asp125Glu	c.375T>A	Missense			0.804258	Neutral	2	777462	2.57247e-06	Uncertain significance	1329079
125	p.Asp125His	c.373G>C	Missense		Functionally neutral	0.947366	Neutral	569	1610420	0.000353324	Conflicting interpretations of pathogenicity	41577
126	p.Val126Asp	c.377T>A	Missense	Pathogenic		1e-10	Deleterious	3	1458484	2.05693e-06	Pathogenic	9420
126	p.Val126Leu	c.376G>C	Missense			0.99984	Neutral	1	1458368	6.85698e-07	Uncertain significance	489868
126	p.Val126Phe	c.376G>T	Missense			0.746325	Neutral	1	1458368	6.85698e-07
126	p.Val126Val	c.378C>T	Synonymous			0.479132	Neutral	1	1458494	6.85639e-07	Likely benign	1692141
126	p.Val126Val	c.378C>G	Synonymous			0.479132	Neutral	1	1458494	6.85639e-07
127	p.Ala127Pro	c.379G>C	Missense		Functionally deleterious	1e-10	Deleterious	1	1458444	6.85662e-07	Conflicting interpretations of pathogenicity	571866
127	p.Ala127Ser	c.379G>T	Missense	Likely benign		0.232638	Neutral	1532	1610798	0.000951081	Benign/Likely benign	41578
127	p.Ala127Val	c.380C>T	Missense			0.834738	Neutral	1	152238	6.56866e-06	Uncertain significance	2030143
128	p.Arg128Gln	c.383G>A	Missense			0.928564	Neutral	19	1610916	1.17945e-05	Uncertain significance	581636
128	p.Arg128Pro	c.383G>C	Missense			1e-10	Deleterious	1	1458694	6.85545e-07	Uncertain significance	483344
130	p.Leu130Leu	c.388C>T	Synonymous			0.479132	Neutral	2	778188	2.57007e-06	Conflicting interpretations of pathogenicity	491575
131	p.Arg131Cys	c.391C>T	Missense			1e-10	Deleterious	1	1459134	6.85338e-07	Uncertain significance	1350948
131	p.Arg131His	c.392G>A	Missense			0.640615	Neutral	2	1459184	1.37063e-06	Uncertain significance	620615
132	p.Ala132Ala	c.396G>C	Synonymous			0.479132	Neutral	1	152250	6.56814e-06	Likely benign	382703
132	p.Ala132Ala	c.396G>T	Synonymous			0.479132	Neutral	1	626296	1.59669e-06
132	p.Ala132Val	c.395C>T	Missense			0.0482684	Neutral	5	1459290	3.42632e-06	Uncertain significance	630452
133	p.Ala133Ala	c.399T>C	Synonymous			0.479132	Neutral	2	1459450	1.37038e-06
134	p.Ala134Ala	c.402G>A	Synonymous			0.567389	Neutral	1	1459422	6.85203e-07	Conflicting interpretations of pathogenicity	583214
134	p.Ala134Ala	c.402G>T	Synonymous			0.567389	Neutral	9	1611668	5.58428e-06	Likely benign	236989
134	p.Ala134Pro	c.400G>C	Missense			0.681609	Neutral	5	1611668	3.10238e-06	Uncertain significance	495536
134	p.Ala134Val	c.401C>T	Missense			0.933281	Neutral	3	626164	4.79108e-06	Uncertain significance	650117
135	p.Gly135Glu	c.404G>A	Missense			4.62749e-10	Deleterious	5	1611926	3.10188e-06	Uncertain significance	463504
135	p.Gly135Gly	c.405G>A	Synonymous			0.479132	Neutral	306	1611984	0.000189828	Benign/Likely benign	383182
135	p.Gly135Val	c.404G>T	Missense			0.365388	Neutral	1	1459674	6.85084e-07	Uncertain significance	843913
136	p.Gly136Ala	c.407G>C	Missense			0.656668	Neutral	2	152212	1.31396e-05	Uncertain significance	483335
136	p.Gly136Asp	c.407G>A	Missense			2.31187e-07	Deleterious	5	626354	7.98271e-06	Uncertain significance	925925
136	p.Gly136Ser	c.406G>A	Missense			0.0275223	Neutral	5	1612104	3.10154e-06	Uncertain significance	483342
137	p.Thr137Pro	c.409A>C	Missense			0.698846	Neutral	1	1459840	6.85007e-07
137	p.Thr137Ser	c.410C>G	Missense			0.768266	Neutral	1	626710	1.59563e-06
138	p.Arg138Gly	c.412A>G	Missense			0.770588	Neutral	15	1612210	9.304e-06	Uncertain significance	233990
139	p.Gly139Arg	c.415G>C	Missense		Functionally neutral	0.327635	Neutral	27	1460010	1.8493e-05	Conflicting interpretations of pathogenicity	216276
139	p.Gly139Asp	c.416G>A	Missense			0.00737325	Deleterious	9	1612280	5.58216e-06	Uncertain significance	491576
139	p.Gly139Ser	c.415G>A	Missense			0.0516845	Neutral	4	1460010	2.73971e-06	Uncertain significance	141419
139	p.Gly139Val	c.416G>T	Missense			0.834997	Neutral	1	1459922	6.84968e-07	Uncertain significance	2172999
140	p.Ser140Ser	c.420T>C	Synonymous			0.479132	Neutral	2	1460096	1.36977e-06	Likely benign	1738745
141	p.Asn141Asn	c.423C>T	Synonymous			0.479132	Neutral	1	1460072	6.84898e-07	Likely benign	924813
141	p.Asn141Asp	c.421A>G	Missense			0.866419	Neutral	1	152230	6.56901e-06	Uncertain significance	631362
142	p.His142Arg	c.425A>G	Missense			1	Neutral	25	1612402	1.55048e-05	Uncertain significance	184564
142	p.His142Gln	c.426T>G	Missense			0.995819	Neutral	1	833110	1.20032e-06	Uncertain significance	246046
142	p.His142Tyr	c.424C>T	Missense			0.999969	Neutral	2	626994	3.18982e-06	Uncertain significance	824721
143	p.Ala143Ala	c.429C>A	Synonymous			0.479132	Neutral	1	1460104	6.84883e-07	Likely benign	414090
143	p.Ala143Gly	c.428C>G	Missense			0.564384	Neutral	5	626918	7.97552e-06	Uncertain significance	630386
143	p.Ala143Thr	c.427G>A	Missense		Functionally neutral	0.718582	Neutral	16	1460132	1.09579e-05	Uncertain significance	245681
144	p.Arg144Arg	c.432C>T	Synonymous			0.479132	Neutral	1	627030	1.59482e-06
144	p.Arg144Cys	c.430C>T	Missense	Likely benign		0.982095	Neutral	763	1612398	0.000473208	Benign/Likely benign	41579
144	p.Arg144His	c.431G>A	Missense			0.678299	Neutral	1	152236	6.56875e-06	Uncertain significance	406723
144	p.Arg144Leu	c.431G>T	Missense			0.890045	Neutral	10	1612274	6.20242e-06	Uncertain significance	463505
144	p.Arg144Ser	c.430C>A	Missense			0.750536	Neutral	1	152216	6.56961e-06
145	p.Ile145Met	c.435A>G	Missense			0.115299	Neutral	1	627006	1.59488e-06
145	p.Ile145Thr	c.434T>C	Missense			0.488773	Neutral	7	1460132	4.79409e-06	Conflicting interpretations of pathogenicity	182420
145	p.Ile145Val	c.433A>G	Missense			0.212155	Neutral	1	1460158	6.84857e-07	Uncertain significance	645545
146	p.Asp146Asn	c.436G>A	Missense			0.118245	Neutral	1	1460116	6.84877e-07	Uncertain significance	578446
146	p.Asp146Glu	c.438T>A	Missense			0.606209	Neutral	1	833110	1.20032e-06
146	p.Asp146His	c.436G>C	Missense			0.217956	Neutral	1	1460116	6.84877e-07	Uncertain significance	824834
146	p.Asp146Val	c.437A>T	Missense			0.587991	Neutral	1	152216	6.56961e-06	Uncertain significance	928297
147	p.Ala147Ala	c.441C>A	Synonymous			0.479132	Neutral	4	1459910	2.73989e-06	Likely benign	391388
147	p.Ala147Val	c.440C>T	Missense			0.312689	Neutral	3	779052	3.85083e-06	Uncertain significance	406716
148	p.Ala148Ala	c.444G>A	Synonymous			0.479132	Neutral	5	1459850	3.42501e-06	Likely benign	923208
148	p.Ala148Gly	c.443C>G	Missense			0.383266	Neutral	1	1459882	6.84987e-07
148	p.Ala148Thr	c.442G>A	Missense	Likely benign		0.4016	Neutral	39384	1612214	0.0244285	Benign	41580
148	p.Ala148Val	c.443C>T	Missense			0.000545313	Deleterious	5	1612130	3.10149e-06	Uncertain significance	231700
150	p.Gly150Asp	c.449G>A	Missense			0.295278	Neutral	3	778834	3.85191e-06	Uncertain significance	483331
150	p.Gly150Gly	c.450T>C	Synonymous			0.479132	Neutral	5	1459644	3.42549e-06	Likely benign	630385
150	p.Gly150Ser	c.448G>A	Missense			0.403107	Neutral	1	626658	1.59577e-06
151	p.Pro151His	c.452C>A	Missense			0.542191	Neutral	1	1459568	6.85134e-07
151	p.Pro151Leu	c.452C>T	Missense			0.0846735	Neutral	4	1611804	2.48169e-06	Uncertain significance	406724
154	p.Ile154Asn	c.461T>A	Missense			0.0573376	Neutral	6	628748	9.54277e-06	Uncertain significance	491579
156	p.Asp156Ala	c.467A>C	Missense			0.00167858	Deleterious	1	833022	1.20045e-06
156	p.Asp156Asn	c.466G>A	Missense			0.109786	Neutral	1	1461724	6.84124e-07	Uncertain significance	629192
156	p.Asp156Asp	c.468T>C	Synonymous			0.479132	Neutral	4	780878	5.12244e-06	Likely benign	215633
156	p.Asp156Tyr	c.466G>T	Missense			0.0126243	Deleterious	2	1461722	1.36825e-06	Uncertain significance	1171898
