# Supplementary material for: Functional characterization of all CDKN2A missense variants and comparison to in silico models of pathogenicity
Source: eLife. 2025 Apr 16;13:RP95347. doi: 10.7554/eLife.95347 (PMC12002794; doi:10.7554/eLife.95347)
Supplement: Supplementary file 12. [file elife-95347-supp12.xlsx]

## Sheet: Appendix 1-table 12
Supplementary File 12. Codon optimized CDKN2A sequence.
Sequence
ATGGAACCCGCCGCTGGCTCATCAATGGAACCCTCTGCAGATTGGCTCGCTACCGCAGCCGCGCGAGGACGAGTGGAAGAAGTCCGAGCGCTCCTTGAAGCCGGTGCATTGCCAAATGCGCCTAACTCCTATGGACGCCGCCCAATACAAGTTATGATGATGGGATCTGCAAGGGTAGCTGAACTTCTCCTCTTGCATGGAGCAGAACCTAATTGTGCTGATCCAGCGACCCTGACTAGACCTGTACATGATGCCGCGCGTGAAGGGTTTCTCGATACCCTTGTCGTCCTTCATCGAGCTGGTGCCCGCCTCGATGTCCGGGACGCATGGGGACGGCTCCCAGTCGATCTCGCAGAAGAACTTGGGCACAGGGACGTAGCCAGATATTTGCGTGCAGCC…
